# Supplementary material
Source: publisher figshare collection journal article supplement (https://gsajournals.figshare.com/ndownloader/files/33924890)
Supplement: Supplementary file 1 [file 33924890]

## Sheet: Cover
An interolog-based barley interactome as an integration framework for NLR immune signaling.
Valeria Velásquez-Zapata, J. Mitch Elmore, Greg Fuerst, Roger P. Wise
S4 Data. Resistant and susceptible subnetworks.
Column	Details
Source	source node
Target	target node
Weight	weight given by expression distance correlation
Source description	source description
Target description	target description
ID	GO ID
Description	gene description
GeneRatio	ratio of the genes with the GO term in the cluster
BgRatio	ratio of the genes with the GO term in the whole network
pvalue	hipergeometric test p-value
p.adjust	hipergeometric test p-adjusted
qvalue	false discovery rate
geneID	gene ID
Count	number of the genes with the GO term in the cluster
GO_definition	definition of the GO term
GO_ontology	ontology of the GO term
GO_term	description of the GO term
group	cluster number

## Sheet: HvInt(R)
Source	Target	Weight	Source description	Target description
HORVU.MOREX.r2.4HG0323930	HORVU.MOREX.r2.1HG0000740	0.889682	Receptor-like protein kinase	Charged multivesicular body protein 5
HORVU.MOREX.r2.5HG0385110	HORVU.MOREX.r2.1HG0000740	0.890117	PRA1 family protein	Charged multivesicular body protein 5
HORVU.MOREX.r2.2HG0079060	HORVU.MOREX.r2.1HG0000740	0.818182	Ethylene receptor	Charged multivesicular body protein 5
HORVU.MOREX.r2.6HG0478620	HORVU.MOREX.r2.1HG0000740	0.906018	ADP,ATP carrier protein	Charged multivesicular body protein 5
HORVU.MOREX.r2.3HG0232400	HORVU.MOREX.r2.1HG0000740	0.828794	O-acyltransferase WSD1	Charged multivesicular body protein 5
HORVU.MOREX.r2.7HG0530810	HORVU.MOREX.r2.1HG0000740	0.826947	Cellulose synthase-like protein	Charged multivesicular body protein 5
HORVU.MOREX.r2.7HG0599010	HORVU.MOREX.r2.1HG0000740	0.76892	extracellular ligand-gated ion channel protein (DUF3537)	Charged multivesicular body protein 5
HORVU.MOREX.r2.7HG0557110	HORVU.MOREX.r2.1HG0000740	0.787026	Potassium transporter	Charged multivesicular body protein 5
HORVU.MOREX.r2.3HG0233190	HORVU.MOREX.r2.1HG0000740	0.808494	Protein kinase family protein	Charged multivesicular body protein 5
HORVU.MOREX.r2.7HG0612440	HORVU.MOREX.r2.1HG0000740	0.902351	LEM3 (Ligand-effect modulator 3)-like	Charged multivesicular body protein 5
HORVU.MOREX.r2.2HG0083720	HORVU.MOREX.r2.1HG0000740	0.8772	Sugar transporter, putative	Charged multivesicular body protein 5
HORVU.MOREX.r2.2HG0111520	HORVU.MOREX.r2.1HG0000740	0.826844	Sugar transporter, putative	Charged multivesicular body protein 5
HORVU.MOREX.r2.2HG0171110	HORVU.MOREX.r2.1HG0000740	0.947195	Cyclic nucleotide-gated channel	Charged multivesicular body protein 5
HORVU.MOREX.r2.7HG0583590	HORVU.MOREX.r2.1HG0000740	0.808271	Amino acid transporter, putative	Charged multivesicular body protein 5
HORVU.MOREX.r2.5HG0401210	HORVU.MOREX.r2.1HG0000740	0.950407	RING/FYVE/PHD zinc finger superfamily protein	Charged multivesicular body protein 5
HORVU.MOREX.r2.3HG0206370	HORVU.MOREX.r2.1HG0000740	0.851978	Peroxisomal membrane 22 kDa (Mpv17/PMP22) family protein	Charged multivesicular body protein 5
HORVU.MOREX.r2.3HG0264820	HORVU.MOREX.r2.1HG0000740	0.78831	Sugar transporter, putative	Charged multivesicular body protein 5
HORVU.MOREX.r2.6HG0507580	HORVU.MOREX.r2.1HG0000740	0.816165	NHL repeat-containing protein-like	Charged multivesicular body protein 5
HORVU.MOREX.r2.2HG0160580	HORVU.MOREX.r2.1HG0000740	0.951689	Ubiquinol oxidase	Charged multivesicular body protein 5
HORVU.MOREX.r2.3HG0188960	HORVU.MOREX.r2.1HG0000740	0.940654	Katanin p60 ATPase-containing subunit, putative	Charged multivesicular body protein 5
HORVU.MOREX.r2.3HG0187370	HORVU.MOREX.r2.1HG0000740	0.80917	Hexose transporter	Charged multivesicular body protein 5
HORVU.MOREX.r2.1HG0057670	HORVU.MOREX.r2.1HG0000740	0.949507	Plant cadmium resistance protein	Charged multivesicular body protein 5
HORVU.MOREX.r2.2HG0117130	HORVU.MOREX.r2.1HG0000740	0.864887	Potassium transporter	Charged multivesicular body protein 5
HORVU.MOREX.r2.2HG0160590	HORVU.MOREX.r2.1HG0000740	0.934632	Ubiquinol oxidase	Charged multivesicular body protein 5
HORVU.MOREX.r2.6HG0476220	HORVU.MOREX.r2.1HG0000740	0.902243	Receptor-like protein kinase	Charged multivesicular body protein 5
HORVU.MOREX.r2.3HG0202690	HORVU.MOREX.r2.1HG0000740	0.771722	Alpha/beta-Hydrolases superfamily protein	Charged multivesicular body protein 5
HORVU.MOREX.r2.3HG0228420	HORVU.MOREX.r2.1HG0000740	0.83732	ADP,ATP carrier protein	Charged multivesicular body protein 5
HORVU.MOREX.r2.6HG0473310	HORVU.MOREX.r2.1HG0000740	0.974466	LEM3 (Ligand-effect modulator 3)-like	Charged multivesicular body protein 5
HORVU.MOREX.r2.4HG0343360	HORVU.MOREX.r2.1HG0000740	0.816694	Multidrug resistance protein ABC transporter family protein	Charged multivesicular body protein 5
HORVU.MOREX.r2.1HG0057800	HORVU.MOREX.r2.1HG0000740	0.874217	PRA1 family protein	Charged multivesicular body protein 5
HORVU.MOREX.r2.1HG0063620	HORVU.MOREX.r2.1HG0000740	0.873102	Phosphate transporter	Charged multivesicular body protein 5
HORVU.MOREX.r2.7HG0593780	HORVU.MOREX.r2.1HG0000740	0.803903	Transmembrane protein, putative	Charged multivesicular body protein 5
HORVU.MOREX.r2.1HG0068840	HORVU.MOREX.r2.1HG0000740	0.853569	Protein kinase family protein	Charged multivesicular body protein 5
HORVU.MOREX.r2.3HG0264880	HORVU.MOREX.r2.1HG0000740	0.765405	Phosphate transporter	Charged multivesicular body protein 5
HORVU.MOREX.r2.3HG0187720	HORVU.MOREX.r2.1HG0000740	0.917686	Protein kinase family protein	Charged multivesicular body protein 5
HORVU.MOREX.r2.4HG0295780	HORVU.MOREX.r2.1HG0000740	0.858277	PRA1 family protein	Charged multivesicular body protein 5
HORVU.MOREX.r2.3HG0200760	HORVU.MOREX.r2.1HG0000740	0.797756	Triose phosphate/phosphate translocator, chloroplastic	Charged multivesicular body protein 5
HORVU.MOREX.r2.3HG0198850	HORVU.MOREX.r2.1HG0000740	0.776058	RING/U-box superfamily protein	Charged multivesicular body protein 5
HORVU.MOREX.r2.2HG0146410	HORVU.MOREX.r2.1HG0000740	0.905837	Receptor-like kinase	Charged multivesicular body protein 5
HORVU.MOREX.r2.1HG0000740	HORVU.MOREX.r2.1HG0000740	1	Charged multivesicular body protein 5	Charged multivesicular body protein 5
HORVU.MOREX.r2.1HG0017530	HORVU.MOREX.r2.1HG0041270	0.871143	Anaphase-promoting complex subunit 7	Carbohydrate kinase, putative, expressed
HORVU.MOREX.r2.7HG0549490	HORVU.MOREX.r2.1HG0056110	0.795819	T-complex protein 1 subunit delta	Proteasome subunit alpha type
HORVU.MOREX.r2.1HG0056110	HORVU.MOREX.r2.1HG0056110	1	Proteasome subunit alpha type	Proteasome subunit alpha type
HORVU.MOREX.r2.2HG0161350	HORVU.MOREX.r2.1HG0056110	0.879025	26S proteasome regulatory subunit family protein	Proteasome subunit alpha type
HORVU.MOREX.r2.4HG0337290	HORVU.MOREX.r2.1HG0056110	0.88957	Proteasome subunit alpha type	Proteasome subunit alpha type
HORVU.MOREX.r2.6HG0520000	HORVU.MOREX.r2.1HG0056110	0.838641	26S protease regulatory subunit-like protein	Proteasome subunit alpha type
HORVU.MOREX.r2.1HG0074920	HORVU.MOREX.r2.1HG0056110	0.777077	Proteasome subunit beta type	Proteasome subunit alpha type
HORVU.MOREX.r2.4HG0279770	HORVU.MOREX.r2.1HG0056110	0.926893	Proteasome subunit beta type	Proteasome subunit alpha type
HORVU.MOREX.r2.5HG0415180	HORVU.MOREX.r2.1HG0056110	0.891774	Proteasome subunit alpha type	Proteasome subunit alpha type
HORVU.MOREX.r2.4HG0338920	HORVU.MOREX.r2.1HG0056110	0.788336	60 kDa chaperonin	Proteasome subunit alpha type
HORVU.MOREX.r2.7HG0570790	HORVU.MOREX.r2.1HG0056110	0.767602	Proteasome subunit alpha type	Proteasome subunit alpha type
HORVU.MOREX.r2.7HG0544550	HORVU.MOREX.r2.1HG0056110	0.861356	Proteasome subunit alpha type	Proteasome subunit alpha type
HORVU.MOREX.r2.4HG0344760	HORVU.MOREX.r2.1HG0056110	0.797952	26S proteasome non-ATPase regulatory subunit-like protein	Proteasome subunit alpha type
HORVU.MOREX.r2.6HG0490320	HORVU.MOREX.r2.1HG0056110	0.832894	26S proteasome non-atpase regulatory subunit, putative	Proteasome subunit alpha type
HORVU.MOREX.r2.4HG0308660	HORVU.MOREX.r2.1HG0056110	0.82807	Proteasome subunit alpha type	Proteasome subunit alpha type
HORVU.MOREX.r2.2HG0167640	HORVU.MOREX.r2.1HG0056110	0.768547	Eukaryotic translation initiation factor 3 subunit F	Proteasome subunit alpha type
HORVU.MOREX.r2.5HG0409440	HORVU.MOREX.r2.1HG0056110	0.891995	Proteasome subunit beta type	Proteasome subunit alpha type
HORVU.MOREX.r2.6HG0515910	HORVU.MOREX.r2.1HG0056110	0.781291	26S protease regulatory subunit	Proteasome subunit alpha type
HORVU.MOREX.r2.2HG0146120	HORVU.MOREX.r2.1HG0056110	0.827365	26S proteasome non-atpase regulatory subunit, putative	Proteasome subunit alpha type
HORVU.MOREX.r2.1HG0023540	HORVU.MOREX.r2.1HG0056110	0.856583	Proteasome subunit beta type	Proteasome subunit alpha type
HORVU.MOREX.r2.7HG0537870	HORVU.MOREX.r2.1HG0056110	0.876555	Proteasome subunit beta type	Proteasome subunit alpha type
HORVU.MOREX.r2.7HG0541070	HORVU.MOREX.r2.1HG0056110	0.840579	Proteasome subunit beta type	Proteasome subunit alpha type
HORVU.MOREX.r2.5HG0411360	HORVU.MOREX.r2.1HG0056110	0.823883	Proteasome subunit beta type	Proteasome subunit alpha type
HORVU.MOREX.r2.7HG0597220	HORVU.MOREX.r2.1HG0056110	0.801254	26S protease regulatory subunit	Proteasome subunit alpha type
HORVU.MOREX.r2.2HG0088730	HORVU.MOREX.r2.1HG0056110	0.79361	26S protease regulatory subunit	Proteasome subunit alpha type
HORVU.MOREX.r2.5HG0382390	HORVU.MOREX.r2.1HG0056110	0.87865	Proteasome-associated protein ECM29-like protein	Proteasome subunit alpha type
HORVU.MOREX.r2.2HG0129920	HORVU.MOREX.r2.1HG0056110	0.773711	26S proteasome non-ATPase regulatory subunit-like protein	Proteasome subunit alpha type
HORVU.MOREX.r2.5HG0434930	HORVU.MOREX.r2.1HG0056110	0.875326	Proteasome subunit beta type	Proteasome subunit alpha type
HORVU.MOREX.r2.5HG0447070	HORVU.MOREX.r2.1HG0056110	0.827043	60 kDa chaperonin	Proteasome subunit alpha type
HORVU.MOREX.r2.6HG0505220	HORVU.MOREX.r2.1HG0056090	0.797241	Pyrophosphate--fructose 6-phosphate 1-phosphotransferase subunit alpha	Calmodulin
HORVU.MOREX.r2.7HG0612760	HORVU.MOREX.r2.1HG0056090	0.809353	Receptor-like kinase	Calmodulin
HORVU.MOREX.r2.7HG0552530	HORVU.MOREX.r2.1HG0056090	0.779186	Shikimate kinase	Calmodulin
HORVU.MOREX.r2.3HG0230390	HORVU.MOREX.r2.1HG0056090	0.791992	Mitogen-activated protein kinase	Calmodulin
HORVU.MOREX.r2.5HG0406220	HORVU.MOREX.r2.1HG0056090	0.859764	Heat shock protein 90	Calmodulin
HORVU.MOREX.r2.1HG0071870	HORVU.MOREX.r2.1HG0056090	0.783101	Calcium binding	Calmodulin
HORVU.MOREX.r2.3HG0255840	HORVU.MOREX.r2.1HG0056090	0.765351	Protein kinase, putative	Calmodulin
HORVU.MOREX.r2.1HG0033960	HORVU.MOREX.r2.1HG0056090	0.77093	Double stranded RNA binding protein 3	Calmodulin
HORVU.MOREX.r2.4HG0281090	HORVU.MOREX.r2.1HG0056090	0.840232	14-3-3 protein	Calmodulin
HORVU.MOREX.r2.3HG0198600	HORVU.MOREX.r2.1HG0061210	0.874047	Syntaxin, putative	Coiled-coil domain-containing protein 47
HORVU.MOREX.r2.7HG0599740	HORVU.MOREX.r2.1HG0066230	0.771663	PLATZ transcription factor family protein	WRKY transcription factor
HORVU.MOREX.r2.1HG0066990	HORVU.MOREX.r2.1HG0066990	1	Phosphotransferase	Phosphotransferase
HORVU.MOREX.r2.5HG0387370	HORVU.MOREX.r2.2HG0079060	0.77223	Divalent metal cation transporter MntH 2	Ethylene receptor
HORVU.MOREX.r2.7HG0587840	HORVU.MOREX.r2.2HG0079060	0.836532	Cyclic nucleotide-gated ion channel-like protein	Ethylene receptor
HORVU.MOREX.r2.2HG0079060	HORVU.MOREX.r2.2HG0079060	1	Ethylene receptor	Ethylene receptor
HORVU.MOREX.r2.5HG0423360	HORVU.MOREX.r2.2HG0102030	0.860213	Magnesium transporter MRS2-like protein	Signal peptidase subunit-12
HORVU.MOREX.r2.1HG0066850	HORVU.MOREX.r2.2HG0102030	0.804131	Glycerophosphodiester phosphodiesterase	Signal peptidase subunit-12
HORVU.MOREX.r2.2HG0110730	HORVU.MOREX.r2.2HG0102030	0.815324	Protein DETOXIFICATION	Signal peptidase subunit-12
HORVU.MOREX.r2.3HG0270990	HORVU.MOREX.r2.2HG0102030	0.806536	Alkaline phytoceramidase (APHC)	Signal peptidase subunit-12
HORVU.MOREX.r2.1HG0053940	HORVU.MOREX.r2.2HG0102030	0.922525	1-acyl-sn-glycerol-3-phosphate acyltransferase	Signal peptidase subunit-12
HORVU.MOREX.r2.7HG0613640	HORVU.MOREX.r2.2HG0102030	0.915625	transmembrane protein, putative (DUF679)	Signal peptidase subunit-12
HORVU.MOREX.r2.7HG0593030	HORVU.MOREX.r2.2HG0102030	0.915363	UDP-galactose transporter, putative	Signal peptidase subunit-12
HORVU.MOREX.r2.2HG0146410	HORVU.MOREX.r2.2HG0102030	0.912498	Receptor-like kinase	Signal peptidase subunit-12
HORVU.MOREX.r2.6HG0522160	HORVU.MOREX.r2.2HG0102030	0.862932	transmembrane protein, putative (DUF679)	Signal peptidase subunit-12
HORVU.MOREX.r2.7HG0534430	HORVU.MOREX.r2.2HG0102030	0.800898	LMBR1-like membrane protein	Signal peptidase subunit-12
HORVU.MOREX.r2.7HG0588100	HORVU.MOREX.r2.2HG0102030	0.79791	Glucan endo-1,3-beta-glucosidase, putative	Signal peptidase subunit-12
HORVU.MOREX.r2.5HG0401690	HORVU.MOREX.r2.2HG0102030	0.855059	Transmembrane protein 45B	Signal peptidase subunit-12
HORVU.MOREX.r2.5HG0419570	HORVU.MOREX.r2.2HG0102030	0.913626	Transmembrane 9 superfamily member	Signal peptidase subunit-12
HORVU.MOREX.r2.5HG0414770	HORVU.MOREX.r2.2HG0102030	0.861889	Protein DETOXIFICATION	Signal peptidase subunit-12
HORVU.MOREX.r2.4HG0279230	HORVU.MOREX.r2.2HG0102030	0.909515	NRT1/PTR family protein 2.2	Signal peptidase subunit-12
HORVU.MOREX.r2.3HG0198850	HORVU.MOREX.r2.2HG0102030	0.793118	RING/U-box superfamily protein	Signal peptidase subunit-12
HORVU.MOREX.r2.4HG0344600	HORVU.MOREX.r2.2HG0102030	0.938577	UDP-galactose transporter	Signal peptidase subunit-12
HORVU.MOREX.r2.5HG0423810	HORVU.MOREX.r2.2HG0102030	0.868267	Tryptophan RNA-binding attenuator-like protein	Signal peptidase subunit-12
HORVU.MOREX.r2.5HG0445510	HORVU.MOREX.r2.2HG0102030	0.877352	Derlin	Signal peptidase subunit-12
HORVU.MOREX.r2.3HG0249370	HORVU.MOREX.r2.2HG0102030	0.822641	Embryogenesis-associated protein EMB8	Signal peptidase subunit-12
HORVU.MOREX.r2.4HG0332820	HORVU.MOREX.r2.2HG0102030	0.925211	Cytochrome b561 and DOMON domain-containing protein	Signal peptidase subunit-12
HORVU.MOREX.r2.4HG0339940	HORVU.MOREX.r2.2HG0102030	0.899836	HR-like lesion-inducing protein-related protein	Signal peptidase subunit-12
HORVU.MOREX.r2.1HG0063620	HORVU.MOREX.r2.2HG0102030	0.843742	Phosphate transporter	Signal peptidase subunit-12
HORVU.MOREX.r2.2HG0083720	HORVU.MOREX.r2.2HG0102030	0.86696	Sugar transporter, putative	Signal peptidase subunit-12
HORVU.MOREX.r2.4HG0295800	HORVU.MOREX.r2.2HG0102030	0.832488	Protein DETOXIFICATION	Signal peptidase subunit-12
HORVU.MOREX.r2.4HG0327430	HORVU.MOREX.r2.2HG0102030	0.866824	Transmembrane 9 superfamily member	Signal peptidase subunit-12
HORVU.MOREX.r2.2HG0105150	HORVU.MOREX.r2.2HG0105150	1	MADS box transcription factor	MADS box transcription factor
HORVU.MOREX.r2.5HG0424650	HORVU.MOREX.r2.2HG0105150	0.845533	MADS box transcription factor	MADS box transcription factor
HORVU.MOREX.r2.1HG0009310	HORVU.MOREX.r2.2HG0112050	0.768971	DNA repair RAD51-like protein	DNA repair family protein
HORVU.MOREX.r2.2HG0137960	HORVU.MOREX.r2.2HG0137960	1	U-box domain-containing family protein	U-box domain-containing family protein
HORVU.MOREX.r2.6HG0521380	HORVU.MOREX.r2.2HG0137960	0.901354	U-box domain-containing family protein	U-box domain-containing family protein
HORVU.MOREX.r2.6HG0521570	HORVU.MOREX.r2.2HG0137960	0.856095	U-box domain-containing family protein	U-box domain-containing family protein
HORVU.MOREX.r2.3HG0250080	HORVU.MOREX.r2.2HG0137960	0.83436	U-box domain-containing family protein	U-box domain-containing family protein
HORVU.MOREX.r2.5HG0437010	HORVU.MOREX.r2.2HG0137270	0.931809	30S ribosomal protein S12	30S ribosomal protein S11
HORVU.MOREX.r2.3HG0182650	HORVU.MOREX.r2.2HG0137270	0.946787	50S ribosomal protein L6	30S ribosomal protein S11
HORVU.MOREX.r2.2HG0158350	HORVU.MOREX.r2.2HG0137270	0.977791	30S ribosomal protein S17	30S ribosomal protein S11
HORVU.MOREX.r2.1HG0058860	HORVU.MOREX.r2.2HG0137270	0.982348	30S ribosomal protein S12	30S ribosomal protein S11
HORVU.MOREX.r2.2HG0161120	HORVU.MOREX.r2.2HG0137270	0.976373	Ribosomal protein L11	30S ribosomal protein S11
HORVU.MOREX.r2.5HG0401170	HORVU.MOREX.r2.2HG0137270	0.896252	30S ribosomal protein S12	30S ribosomal protein S11
HORVU.MOREX.r2.2HG0086170	HORVU.MOREX.r2.2HG0137270	0.948759	40S ribosomal protein S6	30S ribosomal protein S11
HORVU.MOREX.r2.5HG0409860	HORVU.MOREX.r2.2HG0137270	0.988599	60S ribosomal protein L7a	30S ribosomal protein S11
HORVU.MOREX.r2.7HG0528960	HORVU.MOREX.r2.2HG0137270	0.958745	50S ribosomal protein L6	30S ribosomal protein S11
HORVU.MOREX.r2.5HG0389330	HORVU.MOREX.r2.2HG0137270	0.985328	40S ribosomal protein S19	30S ribosomal protein S11
HORVU.MOREX.r2.2HG0103970	HORVU.MOREX.r2.2HG0137270	0.816624	30S ribosomal protein S3	30S ribosomal protein S11
HORVU.MOREX.r2.5HG0433840	HORVU.MOREX.r2.2HG0137270	0.980046	60S ribosomal protein L7	30S ribosomal protein S11
HORVU.MOREX.r2.3HG0182620	HORVU.MOREX.r2.2HG0137270	0.962922	50S ribosomal protein L6	30S ribosomal protein S11
HORVU.MOREX.r2.4HG0331970	HORVU.MOREX.r2.2HG0137270	0.982724	40S ribosomal protein S3a	30S ribosomal protein S11
HORVU.MOREX.r2.3HG0201870	HORVU.MOREX.r2.2HG0137270	0.966345	50S ribosomal protein L5	30S ribosomal protein S11
HORVU.MOREX.r2.1HG0024100	HORVU.MOREX.r2.2HG0137270	0.98451	50S ribosomal protein L5	30S ribosomal protein S11
HORVU.MOREX.r2.2HG0102110	HORVU.MOREX.r2.2HG0137270	0.944972	40S ribosomal protein S6	30S ribosomal protein S11
HORVU.MOREX.r2.5HG0389360	HORVU.MOREX.r2.2HG0137270	0.975614	50S ribosomal protein L22	30S ribosomal protein S11
HORVU.MOREX.r2.2HG0100920	HORVU.MOREX.r2.2HG0137270	0.933407	30S ribosomal protein S4	30S ribosomal protein S11
HORVU.MOREX.r2.5HG0431510	HORVU.MOREX.r2.2HG0137270	0.930287	60S ribosomal protein L4	30S ribosomal protein S11
HORVU.MOREX.r2.7HG0568170	HORVU.MOREX.r2.2HG0137270	0.97983	60S ribosomal protein L7a	30S ribosomal protein S11
HORVU.MOREX.r2.7HG0584290	HORVU.MOREX.r2.2HG0137270	0.939508	40S ribosomal protein S13	30S ribosomal protein S11
HORVU.MOREX.r2.2HG0159710	HORVU.MOREX.r2.2HG0137270	0.984158	60S ribosomal protein L7	30S ribosomal protein S11
HORVU.MOREX.r2.5HG0378380	HORVU.MOREX.r2.2HG0137270	0.95263	30S ribosomal protein S4	30S ribosomal protein S11
HORVU.MOREX.r2.7HG0567650	HORVU.MOREX.r2.2HG0137270	0.957794	50S ribosomal protein L22	30S ribosomal protein S11
HORVU.MOREX.r2.7HG0577600	HORVU.MOREX.r2.2HG0137270	0.977379	60S ribosomal protein L13	30S ribosomal protein S11
HORVU.MOREX.r2.3HG0202480	HORVU.MOREX.r2.2HG0137270	0.942284	50S ribosomal protein L24	30S ribosomal protein S11
HORVU.MOREX.r2.3HG0192970	HORVU.MOREX.r2.2HG0137270	0.964746	30S ribosomal protein S7	30S ribosomal protein S11
HORVU.MOREX.r2.6HG0502730	HORVU.MOREX.r2.2HG0137270	0.963495	50S ribosomal protein L11	30S ribosomal protein S11
HORVU.MOREX.r2.7HG0584220	HORVU.MOREX.r2.2HG0137270	0.985608	40S ribosomal protein S13	30S ribosomal protein S11
HORVU.MOREX.r2.7HG0577670	HORVU.MOREX.r2.2HG0137270	0.979301	30S ribosomal protein S3	30S ribosomal protein S11
HORVU.MOREX.r2.4HG0314500	HORVU.MOREX.r2.2HG0137270	0.989291	Ribosomal protein L19	30S ribosomal protein S11
HORVU.MOREX.r2.2HG0092790	HORVU.MOREX.r2.2HG0137270	0.978256	60S ribosomal protein L18	30S ribosomal protein S11
HORVU.MOREX.r2.4HG0291480	HORVU.MOREX.r2.2HG0137270	0.97125	Ribosomal protein L3	30S ribosomal protein S11
HORVU.MOREX.r2.2HG0092650	HORVU.MOREX.r2.2HG0137270	0.99279	Ribosomal protein L19	30S ribosomal protein S11
HORVU.MOREX.r2.3HG0253300	HORVU.MOREX.r2.2HG0137270	0.983553	30S ribosomal protein S12	30S ribosomal protein S11
HORVU.MOREX.r2.1HG0018910	HORVU.MOREX.r2.2HG0137270	0.987351	60S ribosomal protein L18-like protein	30S ribosomal protein S11
HORVU.MOREX.r2.5HG0430630	HORVU.MOREX.r2.2HG0137270	0.959907	30S ribosomal protein S13	30S ribosomal protein S11
HORVU.MOREX.r2.6HG0488990	HORVU.MOREX.r2.2HG0137270	0.982426	60S ribosomal protein L6	30S ribosomal protein S11
HORVU.MOREX.r2.4HG0336330	HORVU.MOREX.r2.2HG0137270	0.953999	60S ribosomal protein L4	30S ribosomal protein S11
HORVU.MOREX.r2.5HG0376740	HORVU.MOREX.r2.2HG0137270	0.981344	Ribosomal protein L3	30S ribosomal protein S11
HORVU.MOREX.r2.1HG0026750	HORVU.MOREX.r2.2HG0137270	0.930114	40S ribosomal protein S3a	30S ribosomal protein S11
HORVU.MOREX.r2.6HG0454200	HORVU.MOREX.r2.2HG0137270	0.982968	60S ribosomal protein L13	30S ribosomal protein S11
HORVU.MOREX.r2.6HG0492210	HORVU.MOREX.r2.2HG0137270	0.919344	30S ribosomal protein S17	30S ribosomal protein S11
HORVU.MOREX.r2.1HG0018040	HORVU.MOREX.r2.2HG0137270	0.984232	40S ribosomal protein S4	30S ribosomal protein S11
HORVU.MOREX.r2.6HG0497980	HORVU.MOREX.r2.2HG0138950	0.850746	Anaphase-promoting complex subunit 8-like protein	40S ribosomal protein S10
HORVU.MOREX.r2.5HG0430630	HORVU.MOREX.r2.2HG0138950	0.970052	30S ribosomal protein S13	40S ribosomal protein S10
HORVU.MOREX.r2.1HG0059160	HORVU.MOREX.r2.2HG0138950	0.977369	30S ribosomal protein S8, putative	40S ribosomal protein S10
HORVU.MOREX.r2.7HG0577670	HORVU.MOREX.r2.2HG0138950	0.97404	30S ribosomal protein S3	40S ribosomal protein S10
HORVU.MOREX.r2.6HG0492210	HORVU.MOREX.r2.2HG0138950	0.930373	30S ribosomal protein S17	40S ribosomal protein S10
HORVU.MOREX.r2.6HG0484240	HORVU.MOREX.r2.2HG0138950	0.982877	40S ribosomal protein S24	40S ribosomal protein S10
HORVU.MOREX.r2.2HG0103970	HORVU.MOREX.r2.2HG0138950	0.821419	30S ribosomal protein S3	40S ribosomal protein S10
HORVU.MOREX.r2.7HG0595620	HORVU.MOREX.r2.2HG0138950	0.990616	40S ribosomal protein S24	40S ribosomal protein S10
HORVU.MOREX.r2.4HG0294910	HORVU.MOREX.r2.2HG0138950	0.982327	30S ribosomal protein S9	40S ribosomal protein S10
HORVU.MOREX.r2.2HG0100920	HORVU.MOREX.r2.2HG0138950	0.94919	30S ribosomal protein S4	40S ribosomal protein S10
HORVU.MOREX.r2.5HG0383630	HORVU.MOREX.r2.2HG0138950	0.904021	30S ribosomal protein S9	40S ribosomal protein S10
HORVU.MOREX.r2.4HG0294890	HORVU.MOREX.r2.2HG0138950	0.887047	30S ribosomal protein S9	40S ribosomal protein S10
HORVU.MOREX.r2.5HG0378380	HORVU.MOREX.r2.2HG0138950	0.954039	30S ribosomal protein S4	40S ribosomal protein S10
HORVU.MOREX.r2.2HG0152320	HORVU.MOREX.r2.2HG0138950	0.797771	Short chain dehydrogenase/reductase	40S ribosomal protein S10
HORVU.MOREX.r2.3HG0252910	HORVU.MOREX.r2.2HG0138950	0.98565	30S ribosomal protein S8, putative	40S ribosomal protein S10
HORVU.MOREX.r2.1HG0026750	HORVU.MOREX.r2.2HG0138950	0.934777	40S ribosomal protein S3a	40S ribosomal protein S10
HORVU.MOREX.r2.3HG0192970	HORVU.MOREX.r2.2HG0138950	0.979774	30S ribosomal protein S7	40S ribosomal protein S10
HORVU.MOREX.r2.4HG0331970	HORVU.MOREX.r2.2HG0138950	0.989429	40S ribosomal protein S3a	40S ribosomal protein S10
HORVU.MOREX.r2.2HG0168870	HORVU.MOREX.r2.2HG0138950	0.874882	COP9 signalosome complex subunit 5	40S ribosomal protein S10
HORVU.MOREX.r2.2HG0158350	HORVU.MOREX.r2.2HG0138950	0.982614	30S ribosomal protein S17	40S ribosomal protein S10
HORVU.MOREX.r2.1HG0018040	HORVU.MOREX.r2.2HG0138950	0.993596	40S ribosomal protein S4	40S ribosomal protein S10
HORVU.MOREX.r2.1HG0069340	HORVU.MOREX.r2.2HG0143170	0.768175	Guanine nucleotide-binding protein subunit beta-1	Glyceraldehyde-3-phosphate dehydrogenase
HORVU.MOREX.r2.6HG0501850	HORVU.MOREX.r2.2HG0143170	0.814093	AP-2 complex subunit mu	Glyceraldehyde-3-phosphate dehydrogenase
HORVU.MOREX.r2.4HG0281090	HORVU.MOREX.r2.2HG0143770	0.837915	14-3-3 protein	Peroxidase
HORVU.MOREX.r2.5HG0385050	HORVU.MOREX.r2.2HG0177320	0.856768	Zinc finger HIT domain-containing protein 1	Actin-related protein
HORVU.MOREX.r2.7HG0528960	HORVU.MOREX.r2.7HG0528960	1	50S ribosomal protein L6	50S ribosomal protein L6
HORVU.MOREX.r2.7HG0528960	HORVU.MOREX.r2.3HG0182650	0.977415	50S ribosomal protein L6	50S ribosomal protein L6
HORVU.MOREX.r2.7HG0528960	HORVU.MOREX.r2.3HG0182620	0.993439	50S ribosomal protein L6	50S ribosomal protein L6
HORVU.MOREX.r2.3HG0182620	HORVU.MOREX.r2.3HG0182650	0.978447	50S ribosomal protein L6	50S ribosomal protein L6
HORVU.MOREX.r2.3HG0182620	HORVU.MOREX.r2.3HG0182620	1	50S ribosomal protein L6	50S ribosomal protein L6
HORVU.MOREX.r2.3HG0182650	HORVU.MOREX.r2.3HG0182650	1	50S ribosomal protein L6	50S ribosomal protein L6
HORVU.MOREX.r2.2HG0098990	HORVU.MOREX.r2.7HG0528960	0.942331	Eukaryotic translation initiation factor 6	50S ribosomal protein L6
HORVU.MOREX.r2.2HG0098990	HORVU.MOREX.r2.3HG0182650	0.940145	Eukaryotic translation initiation factor 6	50S ribosomal protein L6
HORVU.MOREX.r2.2HG0098990	HORVU.MOREX.r2.3HG0182620	0.948245	Eukaryotic translation initiation factor 6	50S ribosomal protein L6
HORVU.MOREX.r2.4HG0339250	HORVU.MOREX.r2.7HG0528960	0.907415	Ankyrin repeat domain protein, putative	50S ribosomal protein L6
HORVU.MOREX.r2.4HG0339250	HORVU.MOREX.r2.3HG0182650	0.917552	Ankyrin repeat domain protein, putative	50S ribosomal protein L6
HORVU.MOREX.r2.4HG0339250	HORVU.MOREX.r2.3HG0182620	0.910636	Ankyrin repeat domain protein, putative	50S ribosomal protein L6
HORVU.MOREX.r2.1HG0035670	HORVU.MOREX.r2.7HG0528960	0.88401	Nucleolar complex protein 2	50S ribosomal protein L6
HORVU.MOREX.r2.1HG0035670	HORVU.MOREX.r2.3HG0182650	0.908499	Nucleolar complex protein 2	50S ribosomal protein L6
HORVU.MOREX.r2.1HG0035670	HORVU.MOREX.r2.3HG0182620	0.886044	Nucleolar complex protein 2	50S ribosomal protein L6
HORVU.MOREX.r2.3HG0236190	HORVU.MOREX.r2.7HG0528960	0.798337	KRR1 small subunit processome component	50S ribosomal protein L6
HORVU.MOREX.r2.3HG0236190	HORVU.MOREX.r2.3HG0182650	0.838239	KRR1 small subunit processome component	50S ribosomal protein L6
HORVU.MOREX.r2.3HG0236190	HORVU.MOREX.r2.3HG0182620	0.816263	KRR1 small subunit processome component	50S ribosomal protein L6
HORVU.MOREX.r2.1HG0003480	HORVU.MOREX.r2.7HG0528960	0.888948	Pumilio-like protein	50S ribosomal protein L6
HORVU.MOREX.r2.1HG0003480	HORVU.MOREX.r2.3HG0182650	0.880237	Pumilio-like protein	50S ribosomal protein L6
HORVU.MOREX.r2.1HG0003480	HORVU.MOREX.r2.3HG0182620	0.903569	Pumilio-like protein	50S ribosomal protein L6
HORVU.MOREX.r2.4HG0314300	HORVU.MOREX.r2.7HG0528960	0.899423	Nucleolar GTP-binding protein 2	50S ribosomal protein L6
HORVU.MOREX.r2.4HG0314300	HORVU.MOREX.r2.3HG0182650	0.907201	Nucleolar GTP-binding protein 2	50S ribosomal protein L6
HORVU.MOREX.r2.4HG0314300	HORVU.MOREX.r2.3HG0182620	0.911186	Nucleolar GTP-binding protein 2	50S ribosomal protein L6
HORVU.MOREX.r2.1HG0031760	HORVU.MOREX.r2.7HG0528960	0.962382	60S ribosomal protein L21	50S ribosomal protein L6
HORVU.MOREX.r2.1HG0031760	HORVU.MOREX.r2.3HG0182650	0.966981	60S ribosomal protein L21	50S ribosomal protein L6
HORVU.MOREX.r2.1HG0031760	HORVU.MOREX.r2.3HG0182620	0.971334	60S ribosomal protein L21	50S ribosomal protein L6
HORVU.MOREX.r2.1HG0026750	HORVU.MOREX.r2.7HG0528960	0.883983	40S ribosomal protein S3a	50S ribosomal protein L6
HORVU.MOREX.r2.1HG0026750	HORVU.MOREX.r2.3HG0182650	0.924622	40S ribosomal protein S3a	50S ribosomal protein L6
HORVU.MOREX.r2.1HG0026750	HORVU.MOREX.r2.3HG0182620	0.89651	40S ribosomal protein S3a	50S ribosomal protein L6
HORVU.MOREX.r2.4HG0314500	HORVU.MOREX.r2.7HG0528960	0.936188	Ribosomal protein L19	50S ribosomal protein L6
HORVU.MOREX.r2.4HG0314500	HORVU.MOREX.r2.3HG0182650	0.934571	Ribosomal protein L19	50S ribosomal protein L6
HORVU.MOREX.r2.4HG0314500	HORVU.MOREX.r2.3HG0182620	0.942063	Ribosomal protein L19	50S ribosomal protein L6
HORVU.MOREX.r2.3HG0253280	HORVU.MOREX.r2.7HG0528960	0.764829	zinc finger CCCH domain protein	50S ribosomal protein L6
HORVU.MOREX.r2.3HG0253280	HORVU.MOREX.r2.3HG0182650	0.813851	zinc finger CCCH domain protein	50S ribosomal protein L6
HORVU.MOREX.r2.3HG0253280	HORVU.MOREX.r2.3HG0182620	0.768164	zinc finger CCCH domain protein	50S ribosomal protein L6
HORVU.MOREX.r2.2HG0092650	HORVU.MOREX.r2.7HG0528960	0.956417	Ribosomal protein L19	50S ribosomal protein L6
HORVU.MOREX.r2.2HG0092650	HORVU.MOREX.r2.3HG0182650	0.94076	Ribosomal protein L19	50S ribosomal protein L6
HORVU.MOREX.r2.2HG0092650	HORVU.MOREX.r2.3HG0182620	0.962023	Ribosomal protein L19	50S ribosomal protein L6
HORVU.MOREX.r2.2HG0129270	HORVU.MOREX.r2.7HG0528960	0.975431	50S ribosomal protein L13	50S ribosomal protein L6
HORVU.MOREX.r2.2HG0129270	HORVU.MOREX.r2.3HG0182650	0.977979	50S ribosomal protein L13	50S ribosomal protein L6
HORVU.MOREX.r2.2HG0129270	HORVU.MOREX.r2.3HG0182620	0.981664	50S ribosomal protein L13	50S ribosomal protein L6
HORVU.MOREX.r2.4HG0343460	HORVU.MOREX.r2.7HG0528960	0.971964	60S ribosomal protein L21	50S ribosomal protein L6
HORVU.MOREX.r2.4HG0343460	HORVU.MOREX.r2.3HG0182650	0.968954	60S ribosomal protein L21	50S ribosomal protein L6
HORVU.MOREX.r2.4HG0343460	HORVU.MOREX.r2.3HG0182620	0.977095	60S ribosomal protein L21	50S ribosomal protein L6
HORVU.MOREX.r2.5HG0397940	HORVU.MOREX.r2.7HG0528960	0.913067	Ribosome production factor 2-like protein	50S ribosomal protein L6
HORVU.MOREX.r2.5HG0397940	HORVU.MOREX.r2.3HG0182650	0.933169	Ribosome production factor 2-like protein	50S ribosomal protein L6
HORVU.MOREX.r2.5HG0397940	HORVU.MOREX.r2.3HG0182620	0.919087	Ribosome production factor 2-like protein	50S ribosomal protein L6
HORVU.MOREX.r2.2HG0095700	HORVU.MOREX.r2.7HG0528960	0.932246	Ubiquitin carboxyl-terminal hydrolase	50S ribosomal protein L6
HORVU.MOREX.r2.2HG0095700	HORVU.MOREX.r2.3HG0182650	0.919298	Ubiquitin carboxyl-terminal hydrolase	50S ribosomal protein L6
HORVU.MOREX.r2.2HG0095700	HORVU.MOREX.r2.3HG0182620	0.932844	Ubiquitin carboxyl-terminal hydrolase	50S ribosomal protein L6
HORVU.MOREX.r2.4HG0331970	HORVU.MOREX.r2.7HG0528960	0.976649	40S ribosomal protein S3a	50S ribosomal protein L6
HORVU.MOREX.r2.4HG0331970	HORVU.MOREX.r2.3HG0182650	0.968439	40S ribosomal protein S3a	50S ribosomal protein L6
HORVU.MOREX.r2.4HG0331970	HORVU.MOREX.r2.3HG0182620	0.979635	40S ribosomal protein S3a	50S ribosomal protein L6
HORVU.MOREX.r2.4HG0314380	HORVU.MOREX.r2.3HG0200670	0.788055	Uroporphyrinogen decarboxylase	Peroxidase
HORVU.MOREX.r2.3HG0223560	HORVU.MOREX.r2.3HG0215210	0.816883	Pentatricopeptide repeat-containing protein	WD40 repeat-containing protein
HORVU.MOREX.r2.5HG0446060	HORVU.MOREX.r2.3HG0215210	0.901921	Polyribonucleotide nucleotidyltransferase	WD40 repeat-containing protein
HORVU.MOREX.r2.1HG0071030	HORVU.MOREX.r2.3HG0215210	0.917467	Ribonuclease PH	WD40 repeat-containing protein
HORVU.MOREX.r2.5HG0419110	HORVU.MOREX.r2.3HG0215210	0.884467	Exosome complex component CSL4	WD40 repeat-containing protein
HORVU.MOREX.r2.7HG0552920	HORVU.MOREX.r2.3HG0215210	0.974173	Exosome complex component rrp4	WD40 repeat-containing protein
HORVU.MOREX.r2.4HG0285380	HORVU.MOREX.r2.3HG0215210	0.926243	Exosome complex component	WD40 repeat-containing protein
HORVU.MOREX.r2.1HG0066810	HORVU.MOREX.r2.3HG0215210	0.770085	Pentatricopeptide repeat-containing protein	WD40 repeat-containing protein
HORVU.MOREX.r2.7HG0581760	HORVU.MOREX.r2.3HG0215210	0.925806	Exosome complex component	WD40 repeat-containing protein
HORVU.MOREX.r2.6HG0518390	HORVU.MOREX.r2.3HG0215210	0.823054	DNA helicase	WD40 repeat-containing protein
HORVU.MOREX.r2.3HG0234350	HORVU.MOREX.r2.3HG0234350	1	Myb transcription factor	Myb transcription factor
HORVU.MOREX.r2.4HG0280470	HORVU.MOREX.r2.4HG0280470	1	Zinc finger family protein	Zinc finger family protein
HORVU.MOREX.r2.2HG0129270	HORVU.MOREX.r2.4HG0280470	0.875218	50S ribosomal protein L13	Zinc finger family protein
HORVU.MOREX.r2.4HG0314300	HORVU.MOREX.r2.4HG0280470	0.838258	Nucleolar GTP-binding protein 2	Zinc finger family protein
HORVU.MOREX.r2.4HG0325410	HORVU.MOREX.r2.4HG0325410	1	Topless-related protein 1	Topless-related protein 1
HORVU.MOREX.r2.4HG0335030	HORVU.MOREX.r2.4HG0325400	0.852583	Glutathione reductase	Chorismate synthase
HORVU.MOREX.r2.3HG0222430	HORVU.MOREX.r2.5HG0354360	0.83575	DNA damage-binding protein 1	1-deoxy-D-xylulose 5-phosphate synthase 1
HORVU.MOREX.r2.5HG0355760	HORVU.MOREX.r2.5HG0355760	1	Bidirectional sugar transporter SWEET	Bidirectional sugar transporter SWEET
HORVU.MOREX.r2.6HG0491780	HORVU.MOREX.r2.5HG0355760	0.838418	Bidirectional sugar transporter SWEET	Bidirectional sugar transporter SWEET
HORVU.MOREX.r2.1HG0003070	HORVU.MOREX.r2.5HG0383160	0.90131	50S ribosomal protein L22	Ephrin type-B receptor 3
HORVU.MOREX.r2.3HG0209490	HORVU.MOREX.r2.5HG0383160	0.877833	50S ribosomal protein L3, putative	Ephrin type-B receptor 3
HORVU.MOREX.r2.3HG0245120	HORVU.MOREX.r2.5HG0383160	0.860759	Pentatricopeptide repeat-containing protein	Ephrin type-B receptor 3
HORVU.MOREX.r2.2HG0096310	HORVU.MOREX.r2.5HG0383160	0.874222	30S ribosomal protein S9	Ephrin type-B receptor 3
HORVU.MOREX.r2.1HG0034150	HORVU.MOREX.r2.5HG0383160	0.924826	28S ribosomal protein S29, mitochondrial	Ephrin type-B receptor 3
HORVU.MOREX.r2.3HG0232100	HORVU.MOREX.r2.5HG0383160	0.891935	50S ribosomal protein L15, putative, expressed	Ephrin type-B receptor 3
HORVU.MOREX.r2.6HG0519490	HORVU.MOREX.r2.5HG0383160	0.916549	30S ribosomal protein S15	Ephrin type-B receptor 3
HORVU.MOREX.r2.3HG0197100	HORVU.MOREX.r2.5HG0363250	0.886171	Glutamine--tRNA ligase	Methionine--tRNA ligase
HORVU.MOREX.r2.7HG0581610	HORVU.MOREX.r2.5HG0363250	0.848185	Tyrosine--tRNA ligase	Methionine--tRNA ligase
HORVU.MOREX.r2.3HG0190470	HORVU.MOREX.r2.5HG0363250	0.977828	Threonine--tRNA ligase	Methionine--tRNA ligase
HORVU.MOREX.r2.3HG0208150	HORVU.MOREX.r2.5HG0363250	0.92828	Leucine--tRNA ligase	Methionine--tRNA ligase
HORVU.MOREX.r2.5HG0363250	HORVU.MOREX.r2.5HG0363250	1	Methionine--tRNA ligase	Methionine--tRNA ligase
HORVU.MOREX.r2.1HG0000700	HORVU.MOREX.r2.5HG0363250	0.898215	Transcription initiation factor TFIID subunit 6	Methionine--tRNA ligase
HORVU.MOREX.r2.3HG0258190	HORVU.MOREX.r2.5HG0363250	0.880589	Proline--tRNA ligase	Methionine--tRNA ligase
HORVU.MOREX.r2.2HG0099480	HORVU.MOREX.r2.5HG0363250	0.932067	Leucine--tRNA ligase	Methionine--tRNA ligase
HORVU.MOREX.r2.5HG0387260	HORVU.MOREX.r2.5HG0363250	0.956996	Aspartate--tRNA ligase	Methionine--tRNA ligase
HORVU.MOREX.r2.5HG0432020	HORVU.MOREX.r2.5HG0363250	0.939376	Lysine--tRNA ligase	Methionine--tRNA ligase
HORVU.MOREX.r2.2HG0132890	HORVU.MOREX.r2.5HG0388170	0.771498	3-oxoacyl-reductase	Dehydrogenase/reductase SDR family member 2
HORVU.MOREX.r2.2HG0163370	HORVU.MOREX.r2.5HG0388190	0.793047	Chaperone protein DNAj, putative	Plastid-lipid-associated protein
HORVU.MOREX.r2.6HG0457700	HORVU.MOREX.r2.5HG0388190	0.83924	Protein kinase	Plastid-lipid-associated protein
HORVU.MOREX.r2.5HG0388190	HORVU.MOREX.r2.5HG0388190	1	Plastid-lipid-associated protein	Plastid-lipid-associated protein
HORVU.MOREX.r2.3HG0237390	HORVU.MOREX.r2.5HG0386030	0.824736	Pleiotropic drug resistance ABC transporter	Phosphoinositide phospholipase C
HORVU.MOREX.r2.2HG0143420	HORVU.MOREX.r2.5HG0427220	0.876389	14-3-3 protein	Succinate dehydrogenase [ubiquinone] flavoprotein subunit, mitochondrial
HORVU.MOREX.r2.4HG0281090	HORVU.MOREX.r2.5HG0427220	0.889238	14-3-3 protein	Succinate dehydrogenase [ubiquinone] flavoprotein subunit, mitochondrial
HORVU.MOREX.r2.7HG0563540	HORVU.MOREX.r2.5HG0429370	0.979861	Alanine:glyoxylate aminotransferase	Peroxisomal (S)-2-hydroxy-acid oxidase
HORVU.MOREX.r2.6HG0468640	HORVU.MOREX.r2.6HG0468640	1	Non-specific serine/threonine protein kinase	Non-specific serine/threonine protein kinase
HORVU.MOREX.r2.3HG0237260	HORVU.MOREX.r2.6HG0471070	0.792272	Proteasome subunit alpha type	Proteasome subunit beta type
HORVU.MOREX.r2.5HG0409440	HORVU.MOREX.r2.6HG0471070	0.798449	Proteasome subunit beta type	Proteasome subunit beta type
HORVU.MOREX.r2.4HG0337290	HORVU.MOREX.r2.6HG0471070	0.806625	Proteasome subunit alpha type	Proteasome subunit beta type
HORVU.MOREX.r2.4HG0279770	HORVU.MOREX.r2.6HG0471070	0.832803	Proteasome subunit beta type	Proteasome subunit beta type
HORVU.MOREX.r2.1HG0056110	HORVU.MOREX.r2.6HG0471070	0.79174	Proteasome subunit alpha type	Proteasome subunit beta type
HORVU.MOREX.r2.5HG0415180	HORVU.MOREX.r2.6HG0471070	0.822688	Proteasome subunit alpha type	Proteasome subunit beta type
HORVU.MOREX.r2.2HG0108030	HORVU.MOREX.r2.6HG0471070	0.765408	Proteasome subunit alpha type	Proteasome subunit beta type
HORVU.MOREX.r2.5HG0434930	HORVU.MOREX.r2.6HG0471070	0.799809	Proteasome subunit beta type	Proteasome subunit beta type
HORVU.MOREX.r2.6HG0491140	HORVU.MOREX.r2.6HG0491140	1	Ergosterol biosynthetic protein 28	Ergosterol biosynthetic protein 28
HORVU.MOREX.r2.7HG0593030	HORVU.MOREX.r2.6HG0493980	0.779757	UDP-galactose transporter, putative	Long-chain-alcohol oxidase
HORVU.MOREX.r2.6HG0482600	HORVU.MOREX.r2.6HG0482600	1	Protein kinase family protein	Protein kinase family protein
HORVU.MOREX.r2.6HG0469000	HORVU.MOREX.r2.6HG0494410	0.843938	Polyubiquitin	Phenylalanine ammonia-lyase
HORVU.MOREX.r2.6HG0494410	HORVU.MOREX.r2.6HG0494410	1	Phenylalanine ammonia-lyase	Phenylalanine ammonia-lyase
HORVU.MOREX.r2.7HG0562220	HORVU.MOREX.r2.6HG0501040	0.892701	Acetylglutamate kinase	WD-repeat 1
HORVU.MOREX.r2.3HG0201840	HORVU.MOREX.r2.6HG0501040	0.849074	Kinase family protein	WD-repeat 1
HORVU.MOREX.r2.4HG0289970	HORVU.MOREX.r2.6HG0500460	0.844618	SWI/SNF complex subunit SWI3C	Dehydration-responsive element-binding factor 1
HORVU.MOREX.r2.6HG0502970	HORVU.MOREX.r2.6HG0502970	1	Kinase-like protein	Kinase-like protein
HORVU.MOREX.r2.6HG0508580	HORVU.MOREX.r2.6HG0508580	1	Microtubule-associated protein 70-2	Microtubule-associated protein 70-2
HORVU.MOREX.r2.3HG0194750	HORVU.MOREX.r2.6HG0518390	0.770332	Mini-chromosome maintenance complex-binding protein	DNA helicase
HORVU.MOREX.r2.3HG0266870	HORVU.MOREX.r2.6HG0518390	0.772886	Pyrroline-5-carboxylate reductase	DNA helicase
HORVU.MOREX.r2.3HG0227320	HORVU.MOREX.r2.6HG0520620	0.842263	Transducin/WD40 repeat protein	Kinase, putative
HORVU.MOREX.r2.6HG0520620	HORVU.MOREX.r2.6HG0520620	1	Kinase, putative	Kinase, putative
HORVU.MOREX.r2.6HG0498050	HORVU.MOREX.r2.6HG0498050	1	E3 ubiquitin-protein ligase BRE1-like 1	E3 ubiquitin-protein ligase BRE1-like 1
HORVU.MOREX.r2.7HG0544560	HORVU.MOREX.r2.6HG0460020	0.846781	Metaxin-related	MALE GAMETOPHYTE DEFECTIVE 1
HORVU.MOREX.r2.2HG0166380	HORVU.MOREX.r2.2HG0166380	1	Cell division protein ftsZ	Cell division protein ftsZ
HORVU.MOREX.r2.7HG0537910	HORVU.MOREX.r2.7HG0537910	1	Glutathione S-transferase	Glutathione S-transferase
HORVU.MOREX.r2.6HG0505220	HORVU.MOREX.r2.7HG0537910	0.888439	Pyrophosphate--fructose 6-phosphate 1-phosphotransferase subunit alpha	Glutathione S-transferase
HORVU.MOREX.r2.4HG0331210	HORVU.MOREX.r2.7HG0560150	0.814339	Protein kinase	Carboxyl methyltransferase
HORVU.MOREX.r2.4HG0319410	HORVU.MOREX.r2.7HG0560150	0.887745	Eukaryotic translation initiation factor 2 subunit alpha	Carboxyl methyltransferase
HORVU.MOREX.r2.5HG0431990	HORVU.MOREX.r2.7HG0581610	0.887198	rRNA-processing protein efg1	Tyrosine--tRNA ligase
HORVU.MOREX.r2.6HG0464080	HORVU.MOREX.r2.7HG0581610	0.81917	26S proteasome non-ATPase regulatory subunit-like protein	Tyrosine--tRNA ligase
HORVU.MOREX.r2.3HG0190470	HORVU.MOREX.r2.7HG0581610	0.86125	Threonine--tRNA ligase	Tyrosine--tRNA ligase
HORVU.MOREX.r2.7HG0549250	HORVU.MOREX.r2.7HG0589900	0.882884	Auxin response factor	Auxin-responsive protein
HORVU.MOREX.r2.7HG0589900	HORVU.MOREX.r2.7HG0589900	1	Auxin-responsive protein	Auxin-responsive protein
HORVU.MOREX.r2.4HG0314380	HORVU.MOREX.r2.7HG0598850	0.79263	Uroporphyrinogen decarboxylase	Cysteine sulfinate desulfinase/cysteine desulfurase and related enzymes
HORVU.MOREX.r2.3HG0236950	HORVU.MOREX.r2.3HG0236950	1	Serine acetyltransferase	Serine acetyltransferase
HORVU.MOREX.r2.4HG0279970	HORVU.MOREX.r2.7HG0618580	0.91381	Pescadillo homolog	Protein mak16
HORVU.MOREX.r2.1HG0035670	HORVU.MOREX.r2.7HG0618580	0.878607	Nucleolar complex protein 2	Protein mak16
HORVU.MOREX.r2.5HG0354740	HORVU.MOREX.r2.7HG0618580	0.896921	60S ribosomal protein L24	Protein mak16
HORVU.MOREX.r2.7HG0588940	HORVU.MOREX.r2.7HG0618580	0.899563	U3 small nucleolar RNA-associated protein 14	Protein mak16
HORVU.MOREX.r2.2HG0173950	HORVU.MOREX.r2.7HG0618580	0.876216	Bystin	Protein mak16
HORVU.MOREX.r2.5HG0369750	HORVU.MOREX.r2.7HG0618580	0.911387	Nucleolar complex 3-like protein	Protein mak16
HORVU.MOREX.r2.4HG0312690	HORVU.MOREX.r2.7HG0618580	0.917544	Peter Pan-like protein	Protein mak16
HORVU.MOREX.r2.3HG0236190	HORVU.MOREX.r2.7HG0618580	0.90783	KRR1 small subunit processome component	Protein mak16
HORVU.MOREX.r2.5HG0397940	HORVU.MOREX.r2.7HG0618580	0.924462	Ribosome production factor 2-like protein	Protein mak16
HORVU.MOREX.r2.6HG0497960	HORVU.MOREX.r2.6HG0497960	1	Cationic amino acid transporter, putative	Cationic amino acid transporter, putative
HORVU.MOREX.r2.1HG0003480	HORVU.MOREX.r2.6HG0497960	0.814024	Pumilio-like protein	Cationic amino acid transporter, putative
HORVU.MOREX.r2.7HG0608370	HORVU.MOREX.r2.6HG0501260	0.794834	Polyubiquitin	Germin-like protein
HORVU.MOREX.r2.4HG0344580	HORVU.MOREX.r2.1HG0055870	0.782177	Protein kinase	Cyclin
HORVU.MOREX.r2.7HG0568440	HORVU.MOREX.r2.6HG0501060	0.80616	Mitochondrial import inner membrane translocase subunit	Mitochondrial import inner membrane translocase subunit
HORVU.MOREX.r2.5HG0438880	HORVU.MOREX.r2.6HG0501060	0.907182	Mitochondrial import inner membrane translocase subunit	Mitochondrial import inner membrane translocase subunit
HORVU.MOREX.r2.5HG0428870	HORVU.MOREX.r2.1HG0053940	0.920656	AP-1 complex subunit sigma-1	1-acyl-sn-glycerol-3-phosphate acyltransferase
HORVU.MOREX.r2.6HG0480450	HORVU.MOREX.r2.6HG0501530	0.774297	Aminopeptidase	UPF0160 protein MYG1, mitochondrial
HORVU.MOREX.r2.6HG0501530	HORVU.MOREX.r2.6HG0501530	1	UPF0160 protein MYG1, mitochondrial	UPF0160 protein MYG1, mitochondrial
HORVU.MOREX.r2.1HG0003480	HORVU.MOREX.r2.6HG0501530	0.898391	Pumilio-like protein	UPF0160 protein MYG1, mitochondrial
HORVU.MOREX.r2.4HG0336370	HORVU.MOREX.r2.6HG0501530	0.878533	Adenylosuccinate synthetase	UPF0160 protein MYG1, mitochondrial
HORVU.MOREX.r2.7HG0549020	HORVU.MOREX.r2.5HG0419700	0.970389	Nucleolar GTP-binding protein 1	Ribosome biogenesis protein BOP1 homolog
HORVU.MOREX.r2.5HG0354740	HORVU.MOREX.r2.5HG0419700	0.914372	60S ribosomal protein L24	Ribosome biogenesis protein BOP1 homolog
HORVU.MOREX.r2.2HG0165560	HORVU.MOREX.r2.5HG0419700	0.970864	Protein SDA1-like protein	Ribosome biogenesis protein BOP1 homolog
HORVU.MOREX.r2.2HG0093330	HORVU.MOREX.r2.5HG0419700	0.794045	Ribosomal protein S8e/ribosomal biogenesis NSA2	Ribosome biogenesis protein BOP1 homolog
HORVU.MOREX.r2.7HG0619910	HORVU.MOREX.r2.5HG0419700	0.92154	WD40 repeat-like protein	Ribosome biogenesis protein BOP1 homolog
HORVU.MOREX.r2.6HG0488970	HORVU.MOREX.r2.5HG0419700	0.939692	Ribosome biogenesis protein BRX1-like protein	Ribosome biogenesis protein BOP1 homolog
HORVU.MOREX.r2.2HG0095700	HORVU.MOREX.r2.5HG0419700	0.967163	Ubiquitin carboxyl-terminal hydrolase	Ribosome biogenesis protein BOP1 homolog
HORVU.MOREX.r2.4HG0312690	HORVU.MOREX.r2.5HG0419700	0.957494	Peter Pan-like protein	Ribosome biogenesis protein BOP1 homolog
HORVU.MOREX.r2.3HG0236190	HORVU.MOREX.r2.5HG0419700	0.872664	KRR1 small subunit processome component	Ribosome biogenesis protein BOP1 homolog
HORVU.MOREX.r2.4HG0314300	HORVU.MOREX.r2.5HG0419700	0.9257	Nucleolar GTP-binding protein 2	Ribosome biogenesis protein BOP1 homolog
HORVU.MOREX.r2.1HG0003480	HORVU.MOREX.r2.5HG0419700	0.957454	Pumilio-like protein	Ribosome biogenesis protein BOP1 homolog
HORVU.MOREX.r2.2HG0173950	HORVU.MOREX.r2.5HG0419700	0.910738	Bystin	Ribosome biogenesis protein BOP1 homolog
HORVU.MOREX.r2.5HG0411320	HORVU.MOREX.r2.5HG0419700	0.871524	ATP-dependent zinc metalloprotease FtsH	Ribosome biogenesis protein BOP1 homolog
HORVU.MOREX.r2.2HG0094430	HORVU.MOREX.r2.5HG0419700	0.972694	Nucleolar protein	Ribosome biogenesis protein BOP1 homolog
HORVU.MOREX.r2.6HG0507260	HORVU.MOREX.r2.5HG0419700	0.977759	H/ACA ribonucleoprotein complex subunit 2-like protein	Ribosome biogenesis protein BOP1 homolog
HORVU.MOREX.r2.1HG0035670	HORVU.MOREX.r2.5HG0419700	0.90613	Nucleolar complex protein 2	Ribosome biogenesis protein BOP1 homolog
HORVU.MOREX.r2.5HG0439890	HORVU.MOREX.r2.5HG0419700	0.981705	Pumilio	Ribosome biogenesis protein BOP1 homolog
HORVU.MOREX.r2.4HG0279970	HORVU.MOREX.r2.5HG0419700	0.910521	Pescadillo homolog	Ribosome biogenesis protein BOP1 homolog
HORVU.MOREX.r2.5HG0419700	HORVU.MOREX.r2.5HG0419700	1	Ribosome biogenesis protein BOP1 homolog	Ribosome biogenesis protein BOP1 homolog
HORVU.MOREX.r2.1HG0011220	HORVU.MOREX.r2.5HG0419700	0.97673	Polyribonucleotide nucleotidyltransferase	Ribosome biogenesis protein BOP1 homolog
HORVU.MOREX.r2.6HG0506700	HORVU.MOREX.r2.5HG0419700	0.986618	Ribosomal RNA small subunit methyltransferase b	Ribosome biogenesis protein BOP1 homolog
HORVU.MOREX.r2.6HG0490110	HORVU.MOREX.r2.5HG0419700	0.944731	CCAAT/enhancer-binding protein zeta	Ribosome biogenesis protein BOP1 homolog
HORVU.MOREX.r2.6HG0457760	HORVU.MOREX.r2.5HG0419700	0.879911	pumilio 9	Ribosome biogenesis protein BOP1 homolog
HORVU.MOREX.r2.2HG0098990	HORVU.MOREX.r2.5HG0419700	0.915113	Eukaryotic translation initiation factor 6	Ribosome biogenesis protein BOP1 homolog
HORVU.MOREX.r2.7HG0588940	HORVU.MOREX.r2.5HG0419700	0.907828	U3 small nucleolar RNA-associated protein 14	Ribosome biogenesis protein BOP1 homolog
HORVU.MOREX.r2.2HG0180900	HORVU.MOREX.r2.2HG0180900	1	Fatty acid hydroxylase superfamily protein	Fatty acid hydroxylase superfamily protein
HORVU.MOREX.r2.6HG0454350	HORVU.MOREX.r2.6HG0454350	1	Glutamate receptor	Glutamate receptor
HORVU.MOREX.r2.4HG0333510	HORVU.MOREX.r2.6HG0485390	0.89035	Transcription factor	E2F transcription factor
HORVU.MOREX.r2.7HG0569030	HORVU.MOREX.r2.6HG0485390	0.829383	Retinoblastoma-related protein	E2F transcription factor
HORVU.MOREX.r2.6HG0457700	HORVU.MOREX.r2.6HG0485390	0.851223	Protein kinase	E2F transcription factor
HORVU.MOREX.r2.2HG0088730	HORVU.MOREX.r2.5HG0446440	0.787523	26S protease regulatory subunit	ATP-dependent DNA helicase 2 subunit KU80
HORVU.MOREX.r2.1HG0076940	HORVU.MOREX.r2.7HG0590960	0.808761	TPR repeat-containing thioredoxin TTL1	Protein kinase-like
HORVU.MOREX.r2.7HG0582460	HORVU.MOREX.r2.2HG0124800	0.821601	Fertilization independent endosperm 1 protein	Cytosine-specific methyltransferase
HORVU.MOREX.r2.2HG0168290	HORVU.MOREX.r2.2HG0168290	1	C2 domain-containing protein	C2 domain-containing protein
HORVU.MOREX.r2.7HG0602800	HORVU.MOREX.r2.7HG0602800	1	Dolichyl-diphosphooligosaccharide--protein glycosyltransferase 48 kDa subunit	Dolichyl-diphosphooligosaccharide--protein glycosyltransferase 48 kDa subunit
HORVU.MOREX.r2.7HG0530900	HORVU.MOREX.r2.7HG0602800	0.82324	Dolichyl-diphosphooligosaccharide--protein glycosyltransferase subunit DAD1	Dolichyl-diphosphooligosaccharide--protein glycosyltransferase 48 kDa subunit
HORVU.MOREX.r2.7HG0548900	HORVU.MOREX.r2.7HG0602800	0.864596	Alpha-amylase 2	Dolichyl-diphosphooligosaccharide--protein glycosyltransferase 48 kDa subunit
HORVU.MOREX.r2.1HG0012650	HORVU.MOREX.r2.1HG0012650	1	RNA polymerase II-associated protein 3	RNA polymerase II-associated protein 3
HORVU.MOREX.r2.2HG0108340	HORVU.MOREX.r2.2HG0108340	1	BES1/BZR1 homolog 1	BES1/BZR1 homolog 1
HORVU.MOREX.r2.6HG0454040	HORVU.MOREX.r2.6HG0454040	1	DNA-directed RNA polymerase II subunit rpb4	DNA-directed RNA polymerase II subunit rpb4
HORVU.MOREX.r2.5HG0434930	HORVU.MOREX.r2.4HG0279770	0.876441	Proteasome subunit beta type	Proteasome subunit beta type
HORVU.MOREX.r2.5HG0415180	HORVU.MOREX.r2.4HG0279770	0.969742	Proteasome subunit alpha type	Proteasome subunit beta type
HORVU.MOREX.r2.2HG0088730	HORVU.MOREX.r2.4HG0279770	0.807141	26S protease regulatory subunit	Proteasome subunit beta type
HORVU.MOREX.r2.7HG0541070	HORVU.MOREX.r2.4HG0279770	0.849144	Proteasome subunit beta type	Proteasome subunit beta type
HORVU.MOREX.r2.7HG0570790	HORVU.MOREX.r2.4HG0279770	0.799717	Proteasome subunit alpha type	Proteasome subunit beta type
HORVU.MOREX.r2.3HG0237260	HORVU.MOREX.r2.4HG0279770	0.929353	Proteasome subunit alpha type	Proteasome subunit beta type
HORVU.MOREX.r2.2HG0108030	HORVU.MOREX.r2.4HG0279770	0.817854	Proteasome subunit alpha type	Proteasome subunit beta type
HORVU.MOREX.r2.6HG0515910	HORVU.MOREX.r2.4HG0279770	0.768154	26S protease regulatory subunit	Proteasome subunit beta type
HORVU.MOREX.r2.4HG0279770	HORVU.MOREX.r2.4HG0279770	1	Proteasome subunit beta type	Proteasome subunit beta type
HORVU.MOREX.r2.5HG0421800	HORVU.MOREX.r2.4HG0307130	0.974371	Chaperone protein dnaJ, putative	Pimeloyl-[acyl-carrier protein] methyl ester esterase
HORVU.MOREX.r2.2HG0147250	HORVU.MOREX.r2.4HG0307130	0.823144	Chitinase	Pimeloyl-[acyl-carrier protein] methyl ester esterase
HORVU.MOREX.r2.2HG0147240	HORVU.MOREX.r2.4HG0307130	0.769685	Chitinase	Pimeloyl-[acyl-carrier protein] methyl ester esterase
HORVU.MOREX.r2.5HG0436100	HORVU.MOREX.r2.1HG0000110	0.862571	50S ribosomal protein L17	50S ribosomal protein L28
HORVU.MOREX.r2.6HG0469000	HORVU.MOREX.r2.1HG0000020	0.855337	Polyubiquitin	Phospholipid-transporting ATPase
HORVU.MOREX.r2.1HG0000280	HORVU.MOREX.r2.1HG0000280	1	Paired amphipathic helix protein Sin3	Paired amphipathic helix protein Sin3
HORVU.MOREX.r2.1HG0000720	HORVU.MOREX.r2.1HG0000720	1	RING-finger E3 ubiquitin ligase, putative	RING-finger E3 ubiquitin ligase, putative
HORVU.MOREX.r2.5HG0411320	HORVU.MOREX.r2.1HG0000700	0.883588	ATP-dependent zinc metalloprotease FtsH	Transcription initiation factor TFIID subunit 6
HORVU.MOREX.r2.1HG0000700	HORVU.MOREX.r2.1HG0000700	1	Transcription initiation factor TFIID subunit 6	Transcription initiation factor TFIID subunit 6
HORVU.MOREX.r2.1HG0035590	HORVU.MOREX.r2.1HG0000700	0.807434	DNA-directed RNA polymerase subunit beta	Transcription initiation factor TFIID subunit 6
HORVU.MOREX.r2.5HG0441020	HORVU.MOREX.r2.1HG0000700	0.84404	DNA-directed RNA polymerase subunit	Transcription initiation factor TFIID subunit 6
HORVU.MOREX.r2.7HG0560390	HORVU.MOREX.r2.1HG0000700	0.781335	CDK5RAP3-like protein	Transcription initiation factor TFIID subunit 6
HORVU.MOREX.r2.6HG0464080	HORVU.MOREX.r2.1HG0002180	0.828216	26S proteasome non-ATPase regulatory subunit-like protein	Tubulin-specific chaperone cofactor E-like protein
HORVU.MOREX.r2.5HG0444970	HORVU.MOREX.r2.1HG0002180	0.886135	26S proteasome non-ATPase regulatory subunit	Tubulin-specific chaperone cofactor E-like protein
HORVU.MOREX.r2.4HG0326700	HORVU.MOREX.r2.1HG0002180	0.788219	26S proteasome non-ATPase regulatory subunit 4	Tubulin-specific chaperone cofactor E-like protein
HORVU.MOREX.r2.1HG0036120	HORVU.MOREX.r2.1HG0002190	0.898159	Myosin	Ras-like protein
HORVU.MOREX.r2.4HG0295780	HORVU.MOREX.r2.1HG0002190	0.92985	PRA1 family protein	Ras-like protein
HORVU.MOREX.r2.5HG0385110	HORVU.MOREX.r2.1HG0002190	0.87728	PRA1 family protein	Ras-like protein
HORVU.MOREX.r2.1HG0057800	HORVU.MOREX.r2.1HG0002190	0.897048	PRA1 family protein	Ras-like protein
HORVU.MOREX.r2.4HG0291260	HORVU.MOREX.r2.4HG0291260	1	V-type proton ATPase proteolipid subunit	V-type proton ATPase proteolipid subunit
HORVU.MOREX.r2.1HG0001710	HORVU.MOREX.r2.1HG0001710	1	V-type proton ATPase proteolipid subunit	V-type proton ATPase proteolipid subunit
HORVU.MOREX.r2.3HG0198600	HORVU.MOREX.r2.1HG0001540	0.922788	Syntaxin, putative	Actin
HORVU.MOREX.r2.3HG0185180	HORVU.MOREX.r2.1HG0001540	0.772073	WD repeat-containing protein 1	Actin
HORVU.MOREX.r2.5HG0427860	HORVU.MOREX.r2.1HG0001540	0.868737	Actin-depolymerizing factor	Actin
HORVU.MOREX.r2.1HG0001540	HORVU.MOREX.r2.1HG0001540	1	Actin	Actin
HORVU.MOREX.r2.6HG0457370	HORVU.MOREX.r2.1HG0003070	0.973014	50S ribosomal protein L4	50S ribosomal protein L22
HORVU.MOREX.r2.5HG0403140	HORVU.MOREX.r2.1HG0003070	0.938044	50S ribosomal protein L4	50S ribosomal protein L22
HORVU.MOREX.r2.7HG0587840	HORVU.MOREX.r2.1HG0003210	0.770147	Cyclic nucleotide-gated ion channel-like protein	Kinase family protein
HORVU.MOREX.r2.5HG0357890	HORVU.MOREX.r2.1HG0003210	0.78163	Kinase, putative	Kinase family protein
HORVU.MOREX.r2.7HG0615980	HORVU.MOREX.r2.1HG0003210	0.813773	Protein kinase	Kinase family protein
HORVU.MOREX.r2.2HG0156810	HORVU.MOREX.r2.1HG0003480	0.782857	WD40 repeat-containing protein	Pumilio-like protein
HORVU.MOREX.r2.5HG0381520	HORVU.MOREX.r2.1HG0003480	0.889913	2-isopropylmalate synthase	Pumilio-like protein
HORVU.MOREX.r2.1HG0069340	HORVU.MOREX.r2.1HG0003480	0.889385	Guanine nucleotide-binding protein subunit beta-1	Pumilio-like protein
HORVU.MOREX.r2.3HG0232920	HORVU.MOREX.r2.1HG0003480	0.908844	Guanine nucleotide-binding protein beta subunit-like protein	Pumilio-like protein
HORVU.MOREX.r2.1HG0004060	HORVU.MOREX.r2.1HG0004060	1	Transducin/WD40 repeat protein	Transducin/WD40 repeat protein
HORVU.MOREX.r2.6HG0452280	HORVU.MOREX.r2.1HG0004830	0.923413	Histone H2A	Histone H2A
HORVU.MOREX.r2.5HG0435220	HORVU.MOREX.r2.1HG0004830	0.935147	Histone H2A	Histone H2A
HORVU.MOREX.r2.6HG0452310	HORVU.MOREX.r2.1HG0004830	0.952141	Histone H2A	Histone H2A
HORVU.MOREX.r2.6HG0455810	HORVU.MOREX.r2.1HG0004830	0.918945	Histone H2A	Histone H2A
HORVU.MOREX.r2.5HG0434240	HORVU.MOREX.r2.1HG0004830	0.808402	Histone H2A	Histone H2A
HORVU.MOREX.r2.1HG0004830	HORVU.MOREX.r2.1HG0004830	1	Histone H2A	Histone H2A
HORVU.MOREX.r2.5HG0404000	HORVU.MOREX.r2.1HG0004830	0.891987	Histone H2A	Histone H2A
HORVU.MOREX.r2.7HG0595210	HORVU.MOREX.r2.1HG0004870	0.833644	Pollen-specific protein SF21	Inorganic pyrophosphatase family protein
HORVU.MOREX.r2.1HG0004900	HORVU.MOREX.r2.1HG0004900	1	Poly [ADP-ribose] polymerase	Poly [ADP-ribose] polymerase
HORVU.MOREX.r2.2HG0129090	HORVU.MOREX.r2.1HG0006240	0.829324	Protein DETOXIFICATION	Glutathione S-transferase
HORVU.MOREX.r2.7HG0529000	HORVU.MOREX.r2.1HG0006240	0.809412	WAT1-related protein	Glutathione S-transferase
HORVU.MOREX.r2.3HG0255410	HORVU.MOREX.r2.1HG0006240	0.885369	Calcium sensing receptor, chloroplastic	Glutathione S-transferase
HORVU.MOREX.r2.2HG0155090	HORVU.MOREX.r2.1HG0006240	0.812487	Cytochrome P450	Glutathione S-transferase
HORVU.MOREX.r2.3HG0240030	HORVU.MOREX.r2.1HG0006240	0.845666	tobamovirus multiplication protein	Glutathione S-transferase
HORVU.MOREX.r2.6HG0493980	HORVU.MOREX.r2.1HG0006240	0.814947	Long-chain-alcohol oxidase	Glutathione S-transferase
HORVU.MOREX.r2.6HG0490180	HORVU.MOREX.r2.1HG0006240	0.885286	transmembrane protein	Glutathione S-transferase
HORVU.MOREX.r2.1HG0033820	HORVU.MOREX.r2.1HG0006240	0.818258	Transporter-related family protein	Glutathione S-transferase
HORVU.MOREX.r2.6HG0508670	HORVU.MOREX.r2.1HG0006240	0.836988	Nicastrin	Glutathione S-transferase
HORVU.MOREX.r2.3HG0203430	HORVU.MOREX.r2.1HG0006240	0.831724	Receptor-like kinase	Glutathione S-transferase
HORVU.MOREX.r2.1HG0006350	HORVU.MOREX.r2.1HG0006350	1	Agamous MADS-box transcription factor	Agamous MADS-box transcription factor
HORVU.MOREX.r2.3HG0239350	HORVU.MOREX.r2.1HG0007670	0.845433	Nuclear pore complex protein NUP85	Nuclear pore complex protein Nup107
HORVU.MOREX.r2.6HG0449520	HORVU.MOREX.r2.1HG0007880	0.76839	Bidirectional sugar transporter SWEET	Bidirectional sugar transporter SWEET
HORVU.MOREX.r2.1HG0007880	HORVU.MOREX.r2.1HG0007880	1	Bidirectional sugar transporter SWEET	Bidirectional sugar transporter SWEET
HORVU.MOREX.r2.4HG0337290	HORVU.MOREX.r2.1HG0008950	0.90766	Proteasome subunit alpha type	Pyrimidine-specific ribonucleoside hydrolase
HORVU.MOREX.r2.1HG0010080	HORVU.MOREX.r2.1HG0010080	1	Glycosyltransferase	Glycosyltransferase
HORVU.MOREX.r2.6HG0504040	HORVU.MOREX.r2.1HG0010520	0.867238	Protein KINESIN LIGHT CHAIN-RELATED 3	Protein IQ-DOMAIN 1
HORVU.MOREX.r2.1HG0010970	HORVU.MOREX.r2.1HG0010970	1	E3 SUMO-protein ligase SIZ1	E3 SUMO-protein ligase SIZ1
HORVU.MOREX.r2.3HG0232100	HORVU.MOREX.r2.1HG0011220	0.930114	50S ribosomal protein L15, putative, expressed	Polyribonucleotide nucleotidyltransferase
HORVU.MOREX.r2.2HG0094430	HORVU.MOREX.r2.1HG0011220	0.961923	Nucleolar protein	Polyribonucleotide nucleotidyltransferase
HORVU.MOREX.r2.2HG0105280	HORVU.MOREX.r2.1HG0011220	0.889057	Ribosome biogenesis protein WDR12 homolog	Polyribonucleotide nucleotidyltransferase
HORVU.MOREX.r2.5HG0421920	HORVU.MOREX.r2.1HG0011220	0.834508	Large subunit GTPase 1	Polyribonucleotide nucleotidyltransferase
HORVU.MOREX.r2.1HG0065910	HORVU.MOREX.r2.1HG0011220	0.903822	Flap endonuclease 1	Polyribonucleotide nucleotidyltransferase
HORVU.MOREX.r2.1HG0003480	HORVU.MOREX.r2.1HG0011220	0.93666	Pumilio-like protein	Polyribonucleotide nucleotidyltransferase
HORVU.MOREX.r2.2HG0114700	HORVU.MOREX.r2.1HG0011220	0.790211	Pre-rRNA-processing protein esf1	Polyribonucleotide nucleotidyltransferase
HORVU.MOREX.r2.7HG0549020	HORVU.MOREX.r2.1HG0011220	0.946623	Nucleolar GTP-binding protein 1	Polyribonucleotide nucleotidyltransferase
HORVU.MOREX.r2.4HG0284740	HORVU.MOREX.r2.1HG0011220	0.931791	WD40 repeat-like protein	Polyribonucleotide nucleotidyltransferase
HORVU.MOREX.r2.6HG0452850	HORVU.MOREX.r2.1HG0011220	0.860452	RNA-binding NOB1	Polyribonucleotide nucleotidyltransferase
HORVU.MOREX.r2.5HG0381520	HORVU.MOREX.r2.1HG0011220	0.924172	2-isopropylmalate synthase	Polyribonucleotide nucleotidyltransferase
HORVU.MOREX.r2.2HG0173950	HORVU.MOREX.r2.1HG0011220	0.864892	Bystin	Polyribonucleotide nucleotidyltransferase
HORVU.MOREX.r2.6HG0488970	HORVU.MOREX.r2.1HG0011220	0.897122	Ribosome biogenesis protein BRX1-like protein	Polyribonucleotide nucleotidyltransferase
HORVU.MOREX.r2.2HG0092790	HORVU.MOREX.r2.1HG0011220	0.929733	60S ribosomal protein L18	Polyribonucleotide nucleotidyltransferase
HORVU.MOREX.r2.4HG0283890	HORVU.MOREX.r2.1HG0011220	0.864969	Transducin/WD-like repeat-protein	Polyribonucleotide nucleotidyltransferase
HORVU.MOREX.r2.6HG0457760	HORVU.MOREX.r2.1HG0011220	0.858426	pumilio 9	Polyribonucleotide nucleotidyltransferase
HORVU.MOREX.r2.5HG0356470	HORVU.MOREX.r2.1HG0011220	0.918124	Transducin/WD40 repeat protein	Polyribonucleotide nucleotidyltransferase
HORVU.MOREX.r2.6HG0506700	HORVU.MOREX.r2.1HG0011220	0.972996	Ribosomal RNA small subunit methyltransferase b	Polyribonucleotide nucleotidyltransferase
HORVU.MOREX.r2.1HG0076630	HORVU.MOREX.r2.1HG0011220	0.903571	Transducin/WD40 repeat-like superfamily protein	Polyribonucleotide nucleotidyltransferase
HORVU.MOREX.r2.1HG0056240	HORVU.MOREX.r2.1HG0011220	0.765684	Protein KRI1	Polyribonucleotide nucleotidyltransferase
HORVU.MOREX.r2.2HG0095700	HORVU.MOREX.r2.1HG0011220	0.956076	Ubiquitin carboxyl-terminal hydrolase	Polyribonucleotide nucleotidyltransferase
HORVU.MOREX.r2.1HG0078080	HORVU.MOREX.r2.1HG0011220	0.899867	Translation initiation factor if-2, putative	Polyribonucleotide nucleotidyltransferase
HORVU.MOREX.r2.1HG0035670	HORVU.MOREX.r2.1HG0011220	0.880587	Nucleolar complex protein 2	Polyribonucleotide nucleotidyltransferase
HORVU.MOREX.r2.5HG0439890	HORVU.MOREX.r2.1HG0011220	0.95518	Pumilio	Polyribonucleotide nucleotidyltransferase
HORVU.MOREX.r2.5HG0409330	HORVU.MOREX.r2.1HG0011220	0.900585	Nucleolar protein 14	Polyribonucleotide nucleotidyltransferase
HORVU.MOREX.r2.5HG0431560	HORVU.MOREX.r2.1HG0011220	0.886826	U3 small nucleolar RNA-associated protein 18-like protein	Polyribonucleotide nucleotidyltransferase
HORVU.MOREX.r2.3HG0225410	HORVU.MOREX.r2.1HG0011220	0.822732	N-alpha-acetyltransferase 16, NatA auxiliary subunit	Polyribonucleotide nucleotidyltransferase
HORVU.MOREX.r2.2HG0098990	HORVU.MOREX.r2.1HG0011220	0.889915	Eukaryotic translation initiation factor 6	Polyribonucleotide nucleotidyltransferase
HORVU.MOREX.r2.2HG0158620	HORVU.MOREX.r2.1HG0011220	0.770289	RNA binding protein	Polyribonucleotide nucleotidyltransferase
HORVU.MOREX.r2.1HG0011220	HORVU.MOREX.r2.1HG0011220	1	Polyribonucleotide nucleotidyltransferase	Polyribonucleotide nucleotidyltransferase
HORVU.MOREX.r2.1HG0071380	HORVU.MOREX.r2.1HG0011220	0.968856	WD40 repeat-like protein	Polyribonucleotide nucleotidyltransferase
HORVU.MOREX.r2.6HG0515310	HORVU.MOREX.r2.1HG0011220	0.921191	RRP12-like protein	Polyribonucleotide nucleotidyltransferase
HORVU.MOREX.r2.7HG0580620	HORVU.MOREX.r2.1HG0011220	0.838808	U3 small nucleolar ribonucleoprotein IMP4	Polyribonucleotide nucleotidyltransferase
HORVU.MOREX.r2.1HG0078260	HORVU.MOREX.r2.1HG0011720	0.789913	Phosphatase 2C	RRP15-like protein
HORVU.MOREX.r2.1HG0011940	HORVU.MOREX.r2.1HG0011940	1	Aminotransferase-related family protein	Aminotransferase-related family protein
HORVU.MOREX.r2.2HG0143420	HORVU.MOREX.r2.1HG0012450	0.867975	14-3-3 protein	Carotenoid isomerase, putative, expressed
HORVU.MOREX.r2.4HG0281090	HORVU.MOREX.r2.1HG0012450	0.831055	14-3-3 protein	Carotenoid isomerase, putative, expressed
HORVU.MOREX.r2.1HG0013160	HORVU.MOREX.r2.1HG0013160	1	Nitrogen regulatory protein P-II-like protein	Nitrogen regulatory protein P-II-like protein
HORVU.MOREX.r2.1HG0013190	HORVU.MOREX.r2.1HG0013190	1	Protein kinase	Protein kinase
HORVU.MOREX.r2.1HG0013930	HORVU.MOREX.r2.1HG0013930	1	Non-specific serine/threonine protein kinase	Non-specific serine/threonine protein kinase
HORVU.MOREX.r2.1HG0013960	HORVU.MOREX.r2.1HG0013960	1	Non-specific serine/threonine protein kinase	Non-specific serine/threonine protein kinase
HORVU.MOREX.r2.6HG0513890	HORVU.MOREX.r2.1HG0014210	0.836517	THO complex subunit 5	Bushy growth protein
HORVU.MOREX.r2.2HG0133370	HORVU.MOREX.r2.1HG0014210	0.873014	SWI/SNF complex component SNF12-like protein	Bushy growth protein
HORVU.MOREX.r2.1HG0014550	HORVU.MOREX.r2.1HG0014550	1	RNA-binding family protein	RNA-binding family protein
HORVU.MOREX.r2.6HG0463980	HORVU.MOREX.r2.1HG0014550	0.771198	ATP-dependent RNA helicase	RNA-binding family protein
HORVU.MOREX.r2.3HG0232920	HORVU.MOREX.r2.1HG0014990	0.84525	Guanine nucleotide-binding protein beta subunit-like protein	N-acetyltransferase, putative
HORVU.MOREX.r2.1HG0069340	HORVU.MOREX.r2.1HG0014990	0.827376	Guanine nucleotide-binding protein subunit beta-1	N-acetyltransferase, putative
HORVU.MOREX.r2.1HG0019760	HORVU.MOREX.r2.1HG0015010	0.867722	Dihydrolipoyl dehydrogenase	Aminotransferase
HORVU.MOREX.r2.2HG0134380	HORVU.MOREX.r2.1HG0015100	0.773785	Chaperone protein dnaJ	Mitogen-activated protein kinase
HORVU.MOREX.r2.4HG0339840	HORVU.MOREX.r2.1HG0015100	0.840929	Receptor-like kinase	Mitogen-activated protein kinase
HORVU.MOREX.r2.2HG0126140	HORVU.MOREX.r2.1HG0015100	0.800857	Non-specific serine/threonine protein kinase	Mitogen-activated protein kinase
HORVU.MOREX.r2.7HG0616250	HORVU.MOREX.r2.1HG0015100	0.822484	WRKY transcription factor	Mitogen-activated protein kinase
HORVU.MOREX.r2.7HG0616260	HORVU.MOREX.r2.1HG0015100	0.821745	WRKY transcription factor	Mitogen-activated protein kinase
HORVU.MOREX.r2.2HG0149380	HORVU.MOREX.r2.1HG0015640	0.824347	GTF2H2	DNA repair helicase
HORVU.MOREX.r2.6HG0470810	HORVU.MOREX.r2.1HG0015850	0.766739	Sucrose-phosphate synthase	Sucrose-phosphatase
HORVU.MOREX.r2.1HG0015920	HORVU.MOREX.r2.1HG0015920	1	SAD1/UNC-84 domain protein, putative	SAD1/UNC-84 domain protein, putative
HORVU.MOREX.r2.2HG0105740	HORVU.MOREX.r2.1HG0015930	0.849011	Pentatricopeptide repeat-containing protein	Pentatricopeptide repeat superfamily protein
HORVU.MOREX.r2.1HG0015950	HORVU.MOREX.r2.1HG0015950	1	Nucleolar MIF4G domain-containing protein 1	Nucleolar MIF4G domain-containing protein 1
HORVU.MOREX.r2.4HG0283890	HORVU.MOREX.r2.1HG0015950	0.904227	Transducin/WD-like repeat-protein	Nucleolar MIF4G domain-containing protein 1
HORVU.MOREX.r2.7HG0588940	HORVU.MOREX.r2.1HG0015950	0.94381	U3 small nucleolar RNA-associated protein 14	Nucleolar MIF4G domain-containing protein 1
HORVU.MOREX.r2.2HG0173950	HORVU.MOREX.r2.1HG0015950	0.93461	Bystin	Nucleolar MIF4G domain-containing protein 1
HORVU.MOREX.r2.6HG0464080	HORVU.MOREX.r2.1HG0017460	0.764285	26S proteasome non-ATPase regulatory subunit-like protein	Cullin-1
HORVU.MOREX.r2.2HG0146110	HORVU.MOREX.r2.1HG0017160	0.908866	Elongator complex protein 3	Elongator complex protein 2
HORVU.MOREX.r2.2HG0111080	HORVU.MOREX.r2.1HG0017160	0.933162	Elongator complex protein 1	Elongator complex protein 2
HORVU.MOREX.r2.3HG0208150	HORVU.MOREX.r2.1HG0016780	0.816849	Leucine--tRNA ligase	Asparagine--tRNA ligase
HORVU.MOREX.r2.2HG0099480	HORVU.MOREX.r2.1HG0016780	0.847179	Leucine--tRNA ligase	Asparagine--tRNA ligase
HORVU.MOREX.r2.1HG0075740	HORVU.MOREX.r2.1HG0017530	0.822511	Anaphase-promoting complex subunit 10	Anaphase-promoting complex subunit 7
HORVU.MOREX.r2.1HG0017830	HORVU.MOREX.r2.1HG0017830	1	Transport inhibitor response 1	Transport inhibitor response 1
HORVU.MOREX.r2.1HG0017860	HORVU.MOREX.r2.1HG0017860	1	Starch synthase family protein	Starch synthase family protein
HORVU.MOREX.r2.7HG0527390	HORVU.MOREX.r2.1HG0017990	0.77432	Acyl-coenzyme A oxidase	Bifunctional protein FolD
HORVU.MOREX.r2.3HG0190470	HORVU.MOREX.r2.1HG0018010	0.914045	Threonine--tRNA ligase	Histidine--tRNA ligase
HORVU.MOREX.r2.2HG0099480	HORVU.MOREX.r2.1HG0018010	0.872287	Leucine--tRNA ligase	Histidine--tRNA ligase
HORVU.MOREX.r2.5HG0432020	HORVU.MOREX.r2.1HG0018010	0.924915	Lysine--tRNA ligase	Histidine--tRNA ligase
HORVU.MOREX.r2.3HG0208150	HORVU.MOREX.r2.1HG0018010	0.885645	Leucine--tRNA ligase	Histidine--tRNA ligase
HORVU.MOREX.r2.3HG0182620	HORVU.MOREX.r2.1HG0018040	0.980397	50S ribosomal protein L6	40S ribosomal protein S4
HORVU.MOREX.r2.7HG0582810	HORVU.MOREX.r2.1HG0018040	0.922667	60S acidic ribosomal protein P0	40S ribosomal protein S4
HORVU.MOREX.r2.2HG0086170	HORVU.MOREX.r2.1HG0018040	0.968715	40S ribosomal protein S6	40S ribosomal protein S4
HORVU.MOREX.r2.1HG0071380	HORVU.MOREX.r2.1HG0018040	0.959198	WD40 repeat-like protein	40S ribosomal protein S4
HORVU.MOREX.r2.7HG0588940	HORVU.MOREX.r2.1HG0018040	0.92596	U3 small nucleolar RNA-associated protein 14	40S ribosomal protein S4
HORVU.MOREX.r2.3HG0236190	HORVU.MOREX.r2.1HG0018040	0.864981	KRR1 small subunit processome component	40S ribosomal protein S4
HORVU.MOREX.r2.5HG0356470	HORVU.MOREX.r2.1HG0018040	0.915155	Transducin/WD40 repeat protein	40S ribosomal protein S4
HORVU.MOREX.r2.2HG0173950	HORVU.MOREX.r2.1HG0018040	0.935001	Bystin	40S ribosomal protein S4
HORVU.MOREX.r2.6HG0515310	HORVU.MOREX.r2.1HG0018040	0.946243	RRP12-like protein	40S ribosomal protein S4
HORVU.MOREX.r2.4HG0331970	HORVU.MOREX.r2.1HG0018040	0.991414	40S ribosomal protein S3a	40S ribosomal protein S4
HORVU.MOREX.r2.1HG0011220	HORVU.MOREX.r2.1HG0018040	0.936251	Polyribonucleotide nucleotidyltransferase	40S ribosomal protein S4
HORVU.MOREX.r2.2HG0094430	HORVU.MOREX.r2.1HG0018040	0.947922	Nucleolar protein	40S ribosomal protein S4
HORVU.MOREX.r2.2HG0102110	HORVU.MOREX.r2.1HG0018040	0.946335	40S ribosomal protein S6	40S ribosomal protein S4
HORVU.MOREX.r2.2HG0103970	HORVU.MOREX.r2.1HG0018040	0.828143	30S ribosomal protein S3	40S ribosomal protein S4
HORVU.MOREX.r2.5HG0376250	HORVU.MOREX.r2.1HG0018040	0.893616	Nucleolar protein 6	40S ribosomal protein S4
HORVU.MOREX.r2.7HG0528960	HORVU.MOREX.r2.1HG0018040	0.974966	50S ribosomal protein L6	40S ribosomal protein S4
HORVU.MOREX.r2.6HG0491430	HORVU.MOREX.r2.1HG0018040	0.928494	Eukaryotic translation initiation factor	40S ribosomal protein S4
HORVU.MOREX.r2.1HG0078080	HORVU.MOREX.r2.1HG0018040	0.87039	Translation initiation factor if-2, putative	40S ribosomal protein S4
HORVU.MOREX.r2.3HG0272890	HORVU.MOREX.r2.1HG0018040	0.935659	Malignant T-cell-amplified sequence 1	40S ribosomal protein S4
HORVU.MOREX.r2.3HG0182650	HORVU.MOREX.r2.1HG0018040	0.978104	50S ribosomal protein L6	40S ribosomal protein S4
HORVU.MOREX.r2.4HG0343460	HORVU.MOREX.r2.1HG0018040	0.990967	60S ribosomal protein L21	40S ribosomal protein S4
HORVU.MOREX.r2.3HG0192970	HORVU.MOREX.r2.1HG0018040	0.987963	30S ribosomal protein S7	40S ribosomal protein S4
HORVU.MOREX.r2.6HG0492210	HORVU.MOREX.r2.1HG0018040	0.930225	30S ribosomal protein S17	40S ribosomal protein S4
HORVU.MOREX.r2.3HG0256170	HORVU.MOREX.r2.1HG0018040	0.963041	Protein serine/threonine kinase	40S ribosomal protein S4
HORVU.MOREX.r2.2HG0095700	HORVU.MOREX.r2.1HG0018040	0.918642	Ubiquitin carboxyl-terminal hydrolase	40S ribosomal protein S4
HORVU.MOREX.r2.7HG0584220	HORVU.MOREX.r2.1HG0018040	0.994136	40S ribosomal protein S13	40S ribosomal protein S4
HORVU.MOREX.r2.1HG0056240	HORVU.MOREX.r2.1HG0018040	0.872737	Protein KRI1	40S ribosomal protein S4
HORVU.MOREX.r2.7HG0577670	HORVU.MOREX.r2.1HG0018040	0.967961	30S ribosomal protein S3	40S ribosomal protein S4
HORVU.MOREX.r2.2HG0092790	HORVU.MOREX.r2.1HG0018040	0.989465	60S ribosomal protein L18	40S ribosomal protein S4
HORVU.MOREX.r2.3HG0253280	HORVU.MOREX.r2.1HG0018040	0.826635	zinc finger CCCH domain protein	40S ribosomal protein S4
HORVU.MOREX.r2.4HG0343110	HORVU.MOREX.r2.1HG0018040	0.894922	WD40 repeat-like protein	40S ribosomal protein S4
HORVU.MOREX.r2.4HG0339250	HORVU.MOREX.r2.1HG0018040	0.935391	Ankyrin repeat domain protein, putative	40S ribosomal protein S4
HORVU.MOREX.r2.5HG0440720	HORVU.MOREX.r2.1HG0018040	0.955486	RNA 3-terminal phosphate cyclase-like protein	40S ribosomal protein S4
HORVU.MOREX.r2.2HG0129270	HORVU.MOREX.r2.1HG0018040	0.987543	50S ribosomal protein L13	40S ribosomal protein S4
HORVU.MOREX.r2.6HG0452850	HORVU.MOREX.r2.1HG0018040	0.911238	RNA-binding NOB1	40S ribosomal protein S4
HORVU.MOREX.r2.1HG0018910	HORVU.MOREX.r2.1HG0018040	0.990947	60S ribosomal protein L18-like protein	40S ribosomal protein S4
HORVU.MOREX.r2.1HG0026750	HORVU.MOREX.r2.1HG0018040	0.941888	40S ribosomal protein S3a	40S ribosomal protein S4
HORVU.MOREX.r2.5HG0382390	HORVU.MOREX.r2.1HG0018040	0.771831	Proteasome-associated protein ECM29-like protein	40S ribosomal protein S4
HORVU.MOREX.r2.1HG0003480	HORVU.MOREX.r2.1HG0018040	0.892293	Pumilio-like protein	40S ribosomal protein S4
HORVU.MOREX.r2.2HG0158350	HORVU.MOREX.r2.1HG0018040	0.982669	30S ribosomal protein S17	40S ribosomal protein S4
HORVU.MOREX.r2.7HG0591270	HORVU.MOREX.r2.1HG0018040	0.959014	Pre-rRNA-processing protein TSR1-like protein	40S ribosomal protein S4
HORVU.MOREX.r2.4HG0332760	HORVU.MOREX.r2.1HG0018040	0.932907	RNA cytidine acetyltransferase	40S ribosomal protein S4
HORVU.MOREX.r2.3HG0259330	HORVU.MOREX.r2.1HG0018040	0.896372	Mannosyl-oligosaccharide glucosidase	40S ribosomal protein S4
HORVU.MOREX.r2.6HG0488990	HORVU.MOREX.r2.1HG0018040	0.991699	60S ribosomal protein L6	40S ribosomal protein S4
HORVU.MOREX.r2.4HG0314500	HORVU.MOREX.r2.1HG0018040	0.978065	Ribosomal protein L19	40S ribosomal protein S4
HORVU.MOREX.r2.5HG0397940	HORVU.MOREX.r2.1HG0018040	0.956525	Ribosome production factor 2-like protein	40S ribosomal protein S4
HORVU.MOREX.r2.1HG0031760	HORVU.MOREX.r2.1HG0018040	0.987614	60S ribosomal protein L21	40S ribosomal protein S4
HORVU.MOREX.r2.7HG0584290	HORVU.MOREX.r2.1HG0018040	0.923648	40S ribosomal protein S13	40S ribosomal protein S4
HORVU.MOREX.r2.5HG0427890	HORVU.MOREX.r2.1HG0018040	0.86314	Inosine-5'-monophosphate dehydrogenase	40S ribosomal protein S4
HORVU.MOREX.r2.5HG0409330	HORVU.MOREX.r2.1HG0018040	0.920669	Nucleolar protein 14	40S ribosomal protein S4
HORVU.MOREX.r2.2HG0092650	HORVU.MOREX.r2.1HG0018040	0.975728	Ribosomal protein L19	40S ribosomal protein S4
HORVU.MOREX.r2.3HG0210540	HORVU.MOREX.r2.1HG0018040	0.827965	Syntaxin related protein	40S ribosomal protein S4
HORVU.MOREX.r2.1HG0018440	HORVU.MOREX.r2.1HG0018440	1	Phenylalanine ammonia-lyase	Phenylalanine ammonia-lyase
HORVU.MOREX.r2.2HG0153500	HORVU.MOREX.r2.1HG0018770	0.772899	Glutamate dehydrogenase	Leucine aminopeptidase, putative
HORVU.MOREX.r2.1HG0018770	HORVU.MOREX.r2.1HG0018770	1	Leucine aminopeptidase, putative	Leucine aminopeptidase, putative
HORVU.MOREX.r2.6HG0488990	HORVU.MOREX.r2.1HG0018910	0.986232	60S ribosomal protein L6	60S ribosomal protein L18-like protein
HORVU.MOREX.r2.3HG0192970	HORVU.MOREX.r2.1HG0018910	0.978523	30S ribosomal protein S7	60S ribosomal protein L18-like protein
HORVU.MOREX.r2.3HG0182620	HORVU.MOREX.r2.1HG0018910	0.981658	50S ribosomal protein L6	60S ribosomal protein L18-like protein
HORVU.MOREX.r2.7HG0528960	HORVU.MOREX.r2.1HG0018910	0.973682	50S ribosomal protein L6	60S ribosomal protein L18-like protein
HORVU.MOREX.r2.1HG0049050	HORVU.MOREX.r2.1HG0018910	0.94001	Ran-binding protein 1 domain-containing	60S ribosomal protein L18-like protein
HORVU.MOREX.r2.3HG0182650	HORVU.MOREX.r2.1HG0018910	0.96367	50S ribosomal protein L6	60S ribosomal protein L18-like protein
HORVU.MOREX.r2.2HG0158350	HORVU.MOREX.r2.1HG0018910	0.973419	30S ribosomal protein S17	60S ribosomal protein L18-like protein
HORVU.MOREX.r2.7HG0577670	HORVU.MOREX.r2.1HG0018910	0.982154	30S ribosomal protein S3	60S ribosomal protein L18-like protein
HORVU.MOREX.r2.2HG0103970	HORVU.MOREX.r2.1HG0018910	0.809038	30S ribosomal protein S3	60S ribosomal protein L18-like protein
HORVU.MOREX.r2.4HG0331970	HORVU.MOREX.r2.1HG0018910	0.985156	40S ribosomal protein S3a	60S ribosomal protein L18-like protein
HORVU.MOREX.r2.6HG0492210	HORVU.MOREX.r2.1HG0018910	0.92858	30S ribosomal protein S17	60S ribosomal protein L18-like protein
HORVU.MOREX.r2.1HG0031760	HORVU.MOREX.r2.1HG0018910	0.991197	60S ribosomal protein L21	60S ribosomal protein L18-like protein
HORVU.MOREX.r2.4HG0343460	HORVU.MOREX.r2.1HG0018910	0.991684	60S ribosomal protein L21	60S ribosomal protein L18-like protein
HORVU.MOREX.r2.2HG0086170	HORVU.MOREX.r2.1HG0018910	0.948345	40S ribosomal protein S6	60S ribosomal protein L18-like protein
HORVU.MOREX.r2.1HG0026750	HORVU.MOREX.r2.1HG0018910	0.921207	40S ribosomal protein S3a	60S ribosomal protein L18-like protein
HORVU.MOREX.r2.4HG0314500	HORVU.MOREX.r2.1HG0018910	0.978771	Ribosomal protein L19	60S ribosomal protein L18-like protein
HORVU.MOREX.r2.2HG0129270	HORVU.MOREX.r2.1HG0018910	0.988429	50S ribosomal protein L13	60S ribosomal protein L18-like protein
HORVU.MOREX.r2.2HG0102110	HORVU.MOREX.r2.1HG0018910	0.930948	40S ribosomal protein S6	60S ribosomal protein L18-like protein
HORVU.MOREX.r2.2HG0092650	HORVU.MOREX.r2.1HG0018910	0.986723	Ribosomal protein L19	60S ribosomal protein L18-like protein
HORVU.MOREX.r2.7HG0540790	HORVU.MOREX.r2.1HG0019030	0.812504	2,3,4,5-tetrahydropyridine-2,6-dicarboxylate N-acetyltransferase	Fe/S biogenesis protein nfuA
HORVU.MOREX.r2.2HG0098330	HORVU.MOREX.r2.1HG0019030	0.92419	2,3,4,5-tetrahydropyridine-2,6-dicarboxylate N-acetyltransferase	Fe/S biogenesis protein nfuA
HORVU.MOREX.r2.1HG0019030	HORVU.MOREX.r2.1HG0019030	1	Fe/S biogenesis protein nfuA	Fe/S biogenesis protein nfuA
HORVU.MOREX.r2.2HG0133160	HORVU.MOREX.r2.1HG0019110	0.871465	Acyl-[acyl-carrier-protein] desaturase	Disulfide-isomerase
HORVU.MOREX.r2.1HG0055800	HORVU.MOREX.r2.1HG0019290	0.875994	Cyclin	Tubulin beta chain
HORVU.MOREX.r2.1HG0019290	HORVU.MOREX.r2.1HG0019290	1	Tubulin beta chain	Tubulin beta chain
HORVU.MOREX.r2.1HG0055870	HORVU.MOREX.r2.1HG0019290	0.786598	Cyclin	Tubulin beta chain
HORVU.MOREX.r2.1HG0019520	HORVU.MOREX.r2.1HG0019520	1	Universal stress protein	Universal stress protein
HORVU.MOREX.r2.1HG0019570	HORVU.MOREX.r2.1HG0019570	1	DNA-directed RNA polymerase subunit	DNA-directed RNA polymerase subunit
HORVU.MOREX.r2.7HG0532700	HORVU.MOREX.r2.1HG0019680	0.869455	Syntaxin	Golgi apparatus membrane protein TVP23
HORVU.MOREX.r2.1HG0056230	HORVU.MOREX.r2.1HG0019790	0.981066	60S ribosomal protein L30	Ubiquitin
HORVU.MOREX.r2.3HG0226490	HORVU.MOREX.r2.1HG0020140	0.770572	Calcium-dependent protein kinase	Receptor-like kinase, putative
HORVU.MOREX.r2.6HG0491960	HORVU.MOREX.r2.1HG0020650	0.805389	S-adenosylmethionine decarboxylase proenzyme	Thioredoxin-like protein
HORVU.MOREX.r2.2HG0147840	HORVU.MOREX.r2.1HG0020650	0.912228	S-adenosylmethionine decarboxylase proenzyme	Thioredoxin-like protein
HORVU.MOREX.r2.1HG0049050	HORVU.MOREX.r2.1HG0020680	0.830675	Ran-binding protein 1 domain-containing	Ribosomal protein
HORVU.MOREX.r2.3HG0192970	HORVU.MOREX.r2.1HG0020680	0.856175	30S ribosomal protein S7	Ribosomal protein
HORVU.MOREX.r2.2HG0088730	HORVU.MOREX.r2.1HG0020680	0.808558	26S protease regulatory subunit	Ribosomal protein
HORVU.MOREX.r2.3HG0229390	HORVU.MOREX.r2.1HG0020680	0.846779	Myosin heavy chain-like	Ribosomal protein
HORVU.MOREX.r2.1HG0018910	HORVU.MOREX.r2.1HG0020680	0.776255	60S ribosomal protein L18-like protein	Ribosomal protein
HORVU.MOREX.r2.2HG0129270	HORVU.MOREX.r2.1HG0020680	0.792227	50S ribosomal protein L13	Ribosomal protein
HORVU.MOREX.r2.7HG0572270	HORVU.MOREX.r2.1HG0020680	0.79428	Ribosomal protein	Ribosomal protein
HORVU.MOREX.r2.5HG0397940	HORVU.MOREX.r2.1HG0020680	0.770522	Ribosome production factor 2-like protein	Ribosomal protein
HORVU.MOREX.r2.5HG0423580	HORVU.MOREX.r2.1HG0020680	0.804279	Transmembrane emp24 domain-containing protein	Ribosomal protein
HORVU.MOREX.r2.2HG0102110	HORVU.MOREX.r2.1HG0020680	0.885665	40S ribosomal protein S6	Ribosomal protein
HORVU.MOREX.r2.3HG0182650	HORVU.MOREX.r2.1HG0020680	0.809899	50S ribosomal protein L6	Ribosomal protein
HORVU.MOREX.r2.2HG0092790	HORVU.MOREX.r2.1HG0020680	0.816169	60S ribosomal protein L18	Ribosomal protein
HORVU.MOREX.r2.6HG0454200	HORVU.MOREX.r2.1HG0020680	0.802479	60S ribosomal protein L13	Ribosomal protein
HORVU.MOREX.r2.1HG0035670	HORVU.MOREX.r2.1HG0020680	0.847129	Nucleolar complex protein 2	Ribosomal protein
HORVU.MOREX.r2.7HG0584220	HORVU.MOREX.r2.1HG0020680	0.791058	40S ribosomal protein S13	Ribosomal protein
HORVU.MOREX.r2.4HG0312690	HORVU.MOREX.r2.1HG0020680	0.825369	Peter Pan-like protein	Ribosomal protein
HORVU.MOREX.r2.2HG0103970	HORVU.MOREX.r2.1HG0020680	0.925746	30S ribosomal protein S3	Ribosomal protein
HORVU.MOREX.r2.2HG0098990	HORVU.MOREX.r2.1HG0020680	0.779937	Eukaryotic translation initiation factor 6	Ribosomal protein
HORVU.MOREX.r2.5HG0382390	HORVU.MOREX.r2.1HG0020680	0.905635	Proteasome-associated protein ECM29-like protein	Ribosomal protein
HORVU.MOREX.r2.6HG0488990	HORVU.MOREX.r2.1HG0020680	0.813544	60S ribosomal protein L6	Ribosomal protein
HORVU.MOREX.r2.6HG0464080	HORVU.MOREX.r2.1HG0020680	0.856004	26S proteasome non-ATPase regulatory subunit-like protein	Ribosomal protein
HORVU.MOREX.r2.7HG0577600	HORVU.MOREX.r2.1HG0020680	0.784167	60S ribosomal protein L13	Ribosomal protein
HORVU.MOREX.r2.4HG0314300	HORVU.MOREX.r2.1HG0020680	0.764764	Nucleolar GTP-binding protein 2	Ribosomal protein
HORVU.MOREX.r2.1HG0018040	HORVU.MOREX.r2.1HG0020680	0.800507	40S ribosomal protein S4	Ribosomal protein
HORVU.MOREX.r2.5HG0376740	HORVU.MOREX.r2.1HG0020680	0.801704	Ribosomal protein L3	Ribosomal protein
HORVU.MOREX.r2.3HG0253280	HORVU.MOREX.r2.1HG0020680	0.903841	zinc finger CCCH domain protein	Ribosomal protein
HORVU.MOREX.r2.5HG0354740	HORVU.MOREX.r2.1HG0020680	0.858384	60S ribosomal protein L24	Ribosomal protein
HORVU.MOREX.r2.2HG0173950	HORVU.MOREX.r2.1HG0020680	0.855755	Bystin	Ribosomal protein
HORVU.MOREX.r2.4HG0314500	HORVU.MOREX.r2.1HG0020680	0.810619	Ribosomal protein L19	Ribosomal protein
HORVU.MOREX.r2.2HG0086170	HORVU.MOREX.r2.1HG0020680	0.88197	40S ribosomal protein S6	Ribosomal protein
HORVU.MOREX.r2.4HG0343460	HORVU.MOREX.r2.1HG0020680	0.798308	60S ribosomal protein L21	Ribosomal protein
HORVU.MOREX.r2.7HG0557300	HORVU.MOREX.r2.1HG0020680	0.796356	Receptor-like kinase	Ribosomal protein
HORVU.MOREX.r2.1HG0031760	HORVU.MOREX.r2.1HG0020680	0.795061	60S ribosomal protein L21	Ribosomal protein
HORVU.MOREX.r2.1HG0026750	HORVU.MOREX.r2.1HG0020680	0.857517	40S ribosomal protein S3a	Ribosomal protein
HORVU.MOREX.r2.2HG0158350	HORVU.MOREX.r2.1HG0020680	0.854516	30S ribosomal protein S17	Ribosomal protein
HORVU.MOREX.r2.4HG0343480	HORVU.MOREX.r2.1HG0020680	0.798929	50S ribosomal protein L5	Ribosomal protein
HORVU.MOREX.r2.4HG0291480	HORVU.MOREX.r2.1HG0020680	0.839641	Ribosomal protein L3	Ribosomal protein
HORVU.MOREX.r2.5HG0427890	HORVU.MOREX.r2.1HG0020750	0.827354	Inosine-5'-monophosphate dehydrogenase	DNA-directed RNA polymerase
HORVU.MOREX.r2.4HG0315830	HORVU.MOREX.r2.1HG0021340	0.771028	Ricin B-like lectin R40C1	Embryo-specific 3
HORVU.MOREX.r2.2HG0143420	HORVU.MOREX.r2.1HG0021500	0.859873	14-3-3 protein	Serine/threonine protein phosphatase 2A regulatory subunit B
HORVU.MOREX.r2.4HG0281090	HORVU.MOREX.r2.1HG0021500	0.893547	14-3-3 protein	Serine/threonine protein phosphatase 2A regulatory subunit B
HORVU.MOREX.r2.6HG0448760	HORVU.MOREX.r2.1HG0022310	0.830642	Protein disulfide-isomerase	70 kDa heat shock protein
HORVU.MOREX.r2.7HG0619420	HORVU.MOREX.r2.1HG0022310	0.874784	Chaperone protein htpG family protein	70 kDa heat shock protein
HORVU.MOREX.r2.6HG0448760	HORVU.MOREX.r2.1HG0022960	0.808319	Protein disulfide-isomerase	70 kDa heat shock protein
HORVU.MOREX.r2.7HG0619420	HORVU.MOREX.r2.1HG0022960	0.917811	Chaperone protein htpG family protein	70 kDa heat shock protein
HORVU.MOREX.r2.1HG0023130	HORVU.MOREX.r2.1HG0023130	1	FACT complex subunit SSRP1	FACT complex subunit SSRP1
HORVU.MOREX.r2.6HG0469000	HORVU.MOREX.r2.1HG0023430	0.883964	Polyubiquitin	Malic enzyme
HORVU.MOREX.r2.1HG0023530	HORVU.MOREX.r2.1HG0023530	1	Auxin-responsive protein	Auxin-responsive protein
HORVU.MOREX.r2.5HG0444970	HORVU.MOREX.r2.1HG0023540	0.941027	26S proteasome non-ATPase regulatory subunit	Proteasome subunit beta type
HORVU.MOREX.r2.7HG0537870	HORVU.MOREX.r2.1HG0023540	0.933313	Proteasome subunit beta type	Proteasome subunit beta type
HORVU.MOREX.r2.1HG0074920	HORVU.MOREX.r2.1HG0023540	0.844104	Proteasome subunit beta type	Proteasome subunit beta type
HORVU.MOREX.r2.4HG0279770	HORVU.MOREX.r2.1HG0023540	0.842285	Proteasome subunit beta type	Proteasome subunit beta type
HORVU.MOREX.r2.4HG0337290	HORVU.MOREX.r2.1HG0023540	0.974356	Proteasome subunit alpha type	Proteasome subunit beta type
HORVU.MOREX.r2.7HG0592250	HORVU.MOREX.r2.1HG0023540	0.807161	26S protease regulatory subunit, putative	Proteasome subunit beta type
HORVU.MOREX.r2.5HG0411360	HORVU.MOREX.r2.1HG0023540	0.975461	Proteasome subunit beta type	Proteasome subunit beta type
HORVU.MOREX.r2.3HG0237260	HORVU.MOREX.r2.1HG0023540	0.881959	Proteasome subunit alpha type	Proteasome subunit beta type
HORVU.MOREX.r2.2HG0108030	HORVU.MOREX.r2.1HG0023540	0.780056	Proteasome subunit alpha type	Proteasome subunit beta type
HORVU.MOREX.r2.2HG0088730	HORVU.MOREX.r2.1HG0023540	0.945724	26S protease regulatory subunit	Proteasome subunit beta type
HORVU.MOREX.r2.6HG0478760	HORVU.MOREX.r2.1HG0023540	0.865372	26S protease regulatory subunit, putative	Proteasome subunit beta type
HORVU.MOREX.r2.7HG0544550	HORVU.MOREX.r2.1HG0023540	0.791244	Proteasome subunit alpha type	Proteasome subunit beta type
HORVU.MOREX.r2.7HG0541070	HORVU.MOREX.r2.1HG0023540	0.953162	Proteasome subunit beta type	Proteasome subunit beta type
HORVU.MOREX.r2.5HG0415180	HORVU.MOREX.r2.1HG0023540	0.861317	Proteasome subunit alpha type	Proteasome subunit beta type
HORVU.MOREX.r2.2HG0146120	HORVU.MOREX.r2.1HG0023540	0.95924	26S proteasome non-atpase regulatory subunit, putative	Proteasome subunit beta type
HORVU.MOREX.r2.5HG0397220	HORVU.MOREX.r2.1HG0023540	0.839713	Uv excision repair protein rad23, putative	Proteasome subunit beta type
HORVU.MOREX.r2.2HG0167640	HORVU.MOREX.r2.1HG0023540	0.945658	Eukaryotic translation initiation factor 3 subunit F	Proteasome subunit beta type
HORVU.MOREX.r2.4HG0338920	HORVU.MOREX.r2.1HG0023540	0.960516	60 kDa chaperonin	Proteasome subunit beta type
HORVU.MOREX.r2.6HG0515910	HORVU.MOREX.r2.1HG0023540	0.973151	26S protease regulatory subunit	Proteasome subunit beta type
HORVU.MOREX.r2.4HG0326700	HORVU.MOREX.r2.1HG0023550	0.77986	26S proteasome non-ATPase regulatory subunit 4	Phosphotransferase
HORVU.MOREX.r2.1HG0023550	HORVU.MOREX.r2.1HG0023550	1	Phosphotransferase	Phosphotransferase
HORVU.MOREX.r2.6HG0464080	HORVU.MOREX.r2.1HG0023650	0.916382	26S proteasome non-ATPase regulatory subunit-like protein	Derlin
HORVU.MOREX.r2.5HG0445510	HORVU.MOREX.r2.1HG0023650	0.949279	Derlin	Derlin
HORVU.MOREX.r2.6HG0471170	HORVU.MOREX.r2.1HG0023650	0.823444	Ubiquitin fusion degradation 1-like protein	Derlin
HORVU.MOREX.r2.1HG0023650	HORVU.MOREX.r2.1HG0023650	1	Derlin	Derlin
HORVU.MOREX.r2.3HG0220590	HORVU.MOREX.r2.1HG0023650	0.960657	Protein transport protein Sec61 beta subunit	Derlin
HORVU.MOREX.r2.2HG0099640	HORVU.MOREX.r2.1HG0023650	0.83635	SNARE	Derlin
HORVU.MOREX.r2.2HG0168870	HORVU.MOREX.r2.1HG0023690	0.851746	COP9 signalosome complex subunit 5	tRNA N6-adenosine threonylcarbamoyltransferase
HORVU.MOREX.r2.1HG0023790	HORVU.MOREX.r2.1HG0023790	1	PRA1 family protein	PRA1 family protein
HORVU.MOREX.r2.2HG0111740	HORVU.MOREX.r2.1HG0024040	0.799881	Chlorophyll a-b binding protein, chloroplastic	Mitochondrial carrier family
HORVU.MOREX.r2.7HG0577670	HORVU.MOREX.r2.1HG0024100	0.957253	30S ribosomal protein S3	50S ribosomal protein L5
HORVU.MOREX.r2.7HG0584220	HORVU.MOREX.r2.1HG0024100	0.990554	40S ribosomal protein S13	50S ribosomal protein L5
HORVU.MOREX.r2.1HG0026750	HORVU.MOREX.r2.1HG0024100	0.952695	40S ribosomal protein S3a	50S ribosomal protein L5
HORVU.MOREX.r2.2HG0161120	HORVU.MOREX.r2.1HG0024100	0.984502	Ribosomal protein L11	50S ribosomal protein L5
HORVU.MOREX.r2.4HG0336330	HORVU.MOREX.r2.1HG0024100	0.963119	60S ribosomal protein L4	50S ribosomal protein L5
HORVU.MOREX.r2.2HG0092650	HORVU.MOREX.r2.1HG0024100	0.975205	Ribosomal protein L19	50S ribosomal protein L5
HORVU.MOREX.r2.1HG0020680	HORVU.MOREX.r2.1HG0024100	0.794472	Ribosomal protein	50S ribosomal protein L5
HORVU.MOREX.r2.2HG0120460	HORVU.MOREX.r2.1HG0024100	0.983215	Ribosomal protein L15	50S ribosomal protein L5
HORVU.MOREX.r2.3HG0182650	HORVU.MOREX.r2.1HG0024100	0.973861	50S ribosomal protein L6	50S ribosomal protein L5
HORVU.MOREX.r2.7HG0584290	HORVU.MOREX.r2.1HG0024100	0.918877	40S ribosomal protein S13	50S ribosomal protein L5
HORVU.MOREX.r2.7HG0528960	HORVU.MOREX.r2.1HG0024100	0.96603	50S ribosomal protein L6	50S ribosomal protein L5
HORVU.MOREX.r2.3HG0250830	HORVU.MOREX.r2.1HG0024100	0.976556	Ribosomal protein	50S ribosomal protein L5
HORVU.MOREX.r2.6HG0488990	HORVU.MOREX.r2.1HG0024100	0.989282	60S ribosomal protein L6	50S ribosomal protein L5
HORVU.MOREX.r2.2HG0158350	HORVU.MOREX.r2.1HG0024100	0.984465	30S ribosomal protein S17	50S ribosomal protein L5
HORVU.MOREX.r2.7HG0582810	HORVU.MOREX.r2.1HG0024100	0.913043	60S acidic ribosomal protein P0	50S ribosomal protein L5
HORVU.MOREX.r2.3HG0182620	HORVU.MOREX.r2.1HG0024100	0.972422	50S ribosomal protein L6	50S ribosomal protein L5
HORVU.MOREX.r2.4HG0291480	HORVU.MOREX.r2.1HG0024100	0.988147	Ribosomal protein L3	50S ribosomal protein L5
HORVU.MOREX.r2.1HG0018040	HORVU.MOREX.r2.1HG0024100	0.994348	40S ribosomal protein S4	50S ribosomal protein L5
HORVU.MOREX.r2.5HG0431510	HORVU.MOREX.r2.1HG0024100	0.934695	60S ribosomal protein L4	50S ribosomal protein L5
HORVU.MOREX.r2.1HG0018910	HORVU.MOREX.r2.1HG0024100	0.984427	60S ribosomal protein L18-like protein	50S ribosomal protein L5
HORVU.MOREX.r2.4HG0314500	HORVU.MOREX.r2.1HG0024100	0.978883	Ribosomal protein L19	50S ribosomal protein L5
HORVU.MOREX.r2.2HG0092790	HORVU.MOREX.r2.1HG0024100	0.988776	60S ribosomal protein L18	50S ribosomal protein L5
HORVU.MOREX.r2.7HG0572270	HORVU.MOREX.r2.1HG0024100	0.993168	Ribosomal protein	50S ribosomal protein L5
HORVU.MOREX.r2.4HG0331970	HORVU.MOREX.r2.1HG0024100	0.988688	40S ribosomal protein S3a	50S ribosomal protein L5
HORVU.MOREX.r2.5HG0376740	HORVU.MOREX.r2.1HG0024100	0.993293	Ribosomal protein L3	50S ribosomal protein L5
HORVU.MOREX.r2.6HG0502730	HORVU.MOREX.r2.1HG0024100	0.966631	50S ribosomal protein L11	50S ribosomal protein L5
HORVU.MOREX.r2.2HG0103970	HORVU.MOREX.r2.1HG0024100	0.82854	30S ribosomal protein S3	50S ribosomal protein L5
HORVU.MOREX.r2.6HG0454200	HORVU.MOREX.r2.1HG0024100	0.992854	60S ribosomal protein L13	50S ribosomal protein L5
HORVU.MOREX.r2.7HG0577600	HORVU.MOREX.r2.1HG0024100	0.990638	60S ribosomal protein L13	50S ribosomal protein L5
HORVU.MOREX.r2.2HG0086170	HORVU.MOREX.r2.1HG0024100	0.97218	40S ribosomal protein S6	50S ribosomal protein L5
HORVU.MOREX.r2.2HG0102110	HORVU.MOREX.r2.1HG0024100	0.954654	40S ribosomal protein S6	50S ribosomal protein L5
HORVU.MOREX.r2.6HG0492210	HORVU.MOREX.r2.1HG0024100	0.934312	30S ribosomal protein S17	50S ribosomal protein L5
HORVU.MOREX.r2.5HG0432540	HORVU.MOREX.r2.1HG0024540	0.877082	Protein REVERSION-TO-ETHYLENE SENSITIVITY1	Late embryogenesis abundant (LEA) hydroxyproline-rich glycoprotein family
HORVU.MOREX.r2.7HG0567960	HORVU.MOREX.r2.1HG0024540	0.88892	Nodulin-like / Major Facilitator Superfamily protein	Late embryogenesis abundant (LEA) hydroxyproline-rich glycoprotein family
HORVU.MOREX.r2.3HG0251160	HORVU.MOREX.r2.1HG0024540	0.78944	Auxin influx transporter	Late embryogenesis abundant (LEA) hydroxyproline-rich glycoprotein family
HORVU.MOREX.r2.3HG0246490	HORVU.MOREX.r2.1HG0024540	0.809004	Protein kinase, putative	Late embryogenesis abundant (LEA) hydroxyproline-rich glycoprotein family
HORVU.MOREX.r2.2HG0116210	HORVU.MOREX.r2.1HG0024540	0.836472	Protein DETOXIFICATION	Late embryogenesis abundant (LEA) hydroxyproline-rich glycoprotein family
HORVU.MOREX.r2.6HG0491780	HORVU.MOREX.r2.1HG0024540	0.895662	Bidirectional sugar transporter SWEET	Late embryogenesis abundant (LEA) hydroxyproline-rich glycoprotein family
HORVU.MOREX.r2.3HG0203430	HORVU.MOREX.r2.1HG0024540	0.869073	Receptor-like kinase	Late embryogenesis abundant (LEA) hydroxyproline-rich glycoprotein family
HORVU.MOREX.r2.7HG0589750	HORVU.MOREX.r2.1HG0024540	0.886487	Receptor-like kinase, putative	Late embryogenesis abundant (LEA) hydroxyproline-rich glycoprotein family
HORVU.MOREX.r2.3HG0194360	HORVU.MOREX.r2.1HG0024540	0.766627	Receptor protein kinase, putative	Late embryogenesis abundant (LEA) hydroxyproline-rich glycoprotein family
HORVU.MOREX.r2.4HG0281220	HORVU.MOREX.r2.1HG0024540	0.832886	Receptor-like kinase	Late embryogenesis abundant (LEA) hydroxyproline-rich glycoprotein family
HORVU.MOREX.r2.7HG0609260	HORVU.MOREX.r2.1HG0024540	0.783348	Mechanosensitive ion channel-like protein	Late embryogenesis abundant (LEA) hydroxyproline-rich glycoprotein family
HORVU.MOREX.r2.7HG0578670	HORVU.MOREX.r2.1HG0024540	0.773904	Sugar transporter, putative	Late embryogenesis abundant (LEA) hydroxyproline-rich glycoprotein family
HORVU.MOREX.r2.1HG0066850	HORVU.MOREX.r2.1HG0024540	0.804204	Glycerophosphodiester phosphodiesterase	Late embryogenesis abundant (LEA) hydroxyproline-rich glycoprotein family
HORVU.MOREX.r2.1HG0025370	HORVU.MOREX.r2.1HG0024540	0.79177	Receptor-like kinase	Late embryogenesis abundant (LEA) hydroxyproline-rich glycoprotein family
HORVU.MOREX.r2.3HG0202960	HORVU.MOREX.r2.1HG0024540	0.916109	Alkaline phytoceramidase (APHC)	Late embryogenesis abundant (LEA) hydroxyproline-rich glycoprotein family
HORVU.MOREX.r2.1HG0020140	HORVU.MOREX.r2.1HG0024540	0.95441	Receptor-like kinase, putative	Late embryogenesis abundant (LEA) hydroxyproline-rich glycoprotein family
HORVU.MOREX.r2.1HG0024570	HORVU.MOREX.r2.1HG0024570	1	Agamous MADS-box transcription factor	Agamous MADS-box transcription factor
HORVU.MOREX.r2.1HG0025370	HORVU.MOREX.r2.1HG0025370	1	Receptor-like kinase	Receptor-like kinase
HORVU.MOREX.r2.4HG0312850	HORVU.MOREX.r2.1HG0025750	0.817608	splicing factor-like protein	RNA-binding family protein
HORVU.MOREX.r2.5HG0410170	HORVU.MOREX.r2.1HG0025880	0.805745	1-deoxy-D-xylulose 5-phosphate synthase 1	Chaperone DnaK
HORVU.MOREX.r2.4HG0322690	HORVU.MOREX.r2.1HG0025880	0.821523	70 kDa heat shock protein	Chaperone DnaK
HORVU.MOREX.r2.2HG0079060	HORVU.MOREX.r2.1HG0025880	0.831372	Ethylene receptor	Chaperone DnaK
HORVU.MOREX.r2.3HG0227320	HORVU.MOREX.r2.1HG0025880	0.890688	Transducin/WD40 repeat protein	Chaperone DnaK
HORVU.MOREX.r2.4HG0326700	HORVU.MOREX.r2.1HG0026120	0.839514	26S proteasome non-ATPase regulatory subunit 4	Ferrochelatase
HORVU.MOREX.r2.1HG0026120	HORVU.MOREX.r2.1HG0026120	1	Ferrochelatase	Ferrochelatase
HORVU.MOREX.r2.5HG0377370	HORVU.MOREX.r2.1HG0026490	0.828943	NAD-dependent protein deacylase	ATP synthase gamma chain
HORVU.MOREX.r2.4HG0314500	HORVU.MOREX.r2.1HG0026750	0.943109	Ribosomal protein L19	40S ribosomal protein S3a
HORVU.MOREX.r2.3HG0253280	HORVU.MOREX.r2.1HG0026750	0.915643	zinc finger CCCH domain protein	40S ribosomal protein S3a
HORVU.MOREX.r2.2HG0092650	HORVU.MOREX.r2.1HG0026750	0.909439	Ribosomal protein L19	40S ribosomal protein S3a
HORVU.MOREX.r2.3HG0236190	HORVU.MOREX.r2.1HG0026750	0.925608	KRR1 small subunit processome component	40S ribosomal protein S3a
HORVU.MOREX.r2.7HG0588940	HORVU.MOREX.r2.1HG0026750	0.965378	U3 small nucleolar RNA-associated protein 14	40S ribosomal protein S3a
HORVU.MOREX.r2.2HG0114700	HORVU.MOREX.r2.1HG0026750	0.800454	Pre-rRNA-processing protein esf1	40S ribosomal protein S3a
HORVU.MOREX.r2.4HG0343460	HORVU.MOREX.r2.1HG0026750	0.931727	60S ribosomal protein L21	40S ribosomal protein S3a
HORVU.MOREX.r2.3HG0256170	HORVU.MOREX.r2.1HG0026750	0.959885	Protein serine/threonine kinase	40S ribosomal protein S3a
HORVU.MOREX.r2.2HG0095700	HORVU.MOREX.r2.1HG0026750	0.861901	Ubiquitin carboxyl-terminal hydrolase	40S ribosomal protein S3a
HORVU.MOREX.r2.1HG0071380	HORVU.MOREX.r2.1HG0026750	0.92283	WD40 repeat-like protein	40S ribosomal protein S3a
HORVU.MOREX.r2.4HG0324790	HORVU.MOREX.r2.1HG0026750	0.90409	Importin-4	40S ribosomal protein S3a
HORVU.MOREX.r2.6HG0499400	HORVU.MOREX.r2.1HG0026750	0.820061	Transmembrane protein-like protein	40S ribosomal protein S3a
HORVU.MOREX.r2.2HG0173950	HORVU.MOREX.r2.1HG0026750	0.951416	Bystin	40S ribosomal protein S3a
HORVU.MOREX.r2.5HG0397940	HORVU.MOREX.r2.1HG0026750	0.962307	Ribosome production factor 2-like protein	40S ribosomal protein S3a
HORVU.MOREX.r2.4HG0343110	HORVU.MOREX.r2.1HG0026750	0.843772	WD40 repeat-like protein	40S ribosomal protein S3a
HORVU.MOREX.r2.5HG0409330	HORVU.MOREX.r2.1HG0026750	0.962886	Nucleolar protein 14	40S ribosomal protein S3a
HORVU.MOREX.r2.1HG0031760	HORVU.MOREX.r2.1HG0026750	0.941024	60S ribosomal protein L21	40S ribosomal protein S3a
HORVU.MOREX.r2.2HG0129270	HORVU.MOREX.r2.1HG0026750	0.924168	50S ribosomal protein L13	40S ribosomal protein S3a
HORVU.MOREX.r2.1HG0027180	HORVU.MOREX.r2.1HG0027180	1	Vacuolar protein sorting-associated protein 20	Vacuolar protein sorting-associated protein 20
HORVU.MOREX.r2.5HG0430170	HORVU.MOREX.r2.1HG0027190	0.848852	Zinc finger A20 and AN1 domain stress-associated protein	E3 ubiquitin-protein ligase
HORVU.MOREX.r2.1HG0027750	HORVU.MOREX.r2.1HG0027750	1	Histone acetyltransferase GCN5	Histone acetyltransferase GCN5
HORVU.MOREX.r2.1HG0028440	HORVU.MOREX.r2.1HG0028440	1	Tobamovirus multiplication protein 2A	Tobamovirus multiplication protein 2A
HORVU.MOREX.r2.4HG0315180	HORVU.MOREX.r2.1HG0028810	0.871514	Eukaryotic translation initiation factor 2 beta subunit, putative, expressed	Methylthioribose-1-phosphate isomerase
HORVU.MOREX.r2.5HG0364500	HORVU.MOREX.r2.1HG0028810	0.930837	Translation initiation factor eIF-2B subunit epsilon	Methylthioribose-1-phosphate isomerase
HORVU.MOREX.r2.1HG0028810	HORVU.MOREX.r2.1HG0028810	1	Methylthioribose-1-phosphate isomerase	Methylthioribose-1-phosphate isomerase
HORVU.MOREX.r2.6HG0469590	HORVU.MOREX.r2.1HG0028810	0.941056	DNA-directed RNA polymerase subunit	Methylthioribose-1-phosphate isomerase
HORVU.MOREX.r2.1HG0069340	HORVU.MOREX.r2.1HG0029020	0.787079	Guanine nucleotide-binding protein subunit beta-1	Ribulose bisphosphate carboxylase small chain
HORVU.MOREX.r2.6HG0504040	HORVU.MOREX.r2.1HG0029020	0.831981	Protein KINESIN LIGHT CHAIN-RELATED 3	Ribulose bisphosphate carboxylase small chain
HORVU.MOREX.r2.1HG0052310	HORVU.MOREX.r2.1HG0029020	0.851303	KH domain-containing protein	Ribulose bisphosphate carboxylase small chain
HORVU.MOREX.r2.5HG0369400	HORVU.MOREX.r2.1HG0029020	0.852126	Conserved oligomeric Golgi complex subunit 8	Ribulose bisphosphate carboxylase small chain
HORVU.MOREX.r2.1HG0029600	HORVU.MOREX.r2.1HG0029600	1	DNA polymerase epsilon, catalytic subunit, putative	DNA polymerase epsilon, catalytic subunit, putative
HORVU.MOREX.r2.1HG0030230	HORVU.MOREX.r2.1HG0030230	1	Translin family protein, expressed	Translin family protein, expressed
HORVU.MOREX.r2.2HG0129270	HORVU.MOREX.r2.1HG0030900	0.829458	50S ribosomal protein L13	Midasin
HORVU.MOREX.r2.4HG0280470	HORVU.MOREX.r2.1HG0030900	0.797782	Zinc finger family protein	Midasin
HORVU.MOREX.r2.5HG0409860	HORVU.MOREX.r2.1HG0030900	0.835569	60S ribosomal protein L7a	Midasin
HORVU.MOREX.r2.4HG0297450	HORVU.MOREX.r2.1HG0030900	0.797883	WD-repeat protein, putative	Midasin
HORVU.MOREX.r2.4HG0336330	HORVU.MOREX.r2.1HG0030900	0.886005	60S ribosomal protein L4	Midasin
HORVU.MOREX.r2.2HG0165560	HORVU.MOREX.r2.1HG0030900	0.809042	Protein SDA1-like protein	Midasin
HORVU.MOREX.r2.4HG0291480	HORVU.MOREX.r2.1HG0030900	0.809301	Ribosomal protein L3	Midasin
HORVU.MOREX.r2.4HG0314300	HORVU.MOREX.r2.1HG0030900	0.766789	Nucleolar GTP-binding protein 2	Midasin
HORVU.MOREX.r2.1HG0003480	HORVU.MOREX.r2.1HG0030900	0.853542	Pumilio-like protein	Midasin
HORVU.MOREX.r2.5HG0385560	HORVU.MOREX.r2.1HG0030900	0.847473	60S acidic ribosomal protein P0	Midasin
HORVU.MOREX.r2.7HG0549020	HORVU.MOREX.r2.1HG0030900	0.86667	Nucleolar GTP-binding protein 1	Midasin
HORVU.MOREX.r2.3HG0232920	HORVU.MOREX.r2.1HG0030920	0.843109	Guanine nucleotide-binding protein beta subunit-like protein	Polyadenylate-binding protein
HORVU.MOREX.r2.1HG0069340	HORVU.MOREX.r2.1HG0030920	0.816871	Guanine nucleotide-binding protein subunit beta-1	Polyadenylate-binding protein
HORVU.MOREX.r2.1HG0031000	HORVU.MOREX.r2.1HG0031000	1	3-ketoacyl-CoA thiolase	3-ketoacyl-CoA thiolase
HORVU.MOREX.r2.7HG0558720	HORVU.MOREX.r2.1HG0031510	0.823257	T-complex protein 1 subunit alpha	60 kDa chaperonin
HORVU.MOREX.r2.6HG0523490	HORVU.MOREX.r2.1HG0031510	0.819103	T-complex protein 1 subunit zeta	60 kDa chaperonin
HORVU.MOREX.r2.6HG0467890	HORVU.MOREX.r2.1HG0031510	0.894022	T-complex protein 1 subunit eta	60 kDa chaperonin
HORVU.MOREX.r2.6HG0490320	HORVU.MOREX.r2.1HG0031510	0.846766	26S proteasome non-atpase regulatory subunit, putative	60 kDa chaperonin
HORVU.MOREX.r2.7HG0549490	HORVU.MOREX.r2.1HG0031510	0.809527	T-complex protein 1 subunit delta	60 kDa chaperonin
HORVU.MOREX.r2.6HG0469000	HORVU.MOREX.r2.1HG0031540	0.794516	Polyubiquitin	Cysteine--tRNA ligase
HORVU.MOREX.r2.1HG0069340	HORVU.MOREX.r2.1HG0031760	0.955606	Guanine nucleotide-binding protein subunit beta-1	60S ribosomal protein L21
HORVU.MOREX.r2.3HG0232920	HORVU.MOREX.r2.1HG0031760	0.967906	Guanine nucleotide-binding protein beta subunit-like protein	60S ribosomal protein L21
HORVU.MOREX.r2.5HG0406360	HORVU.MOREX.r2.1HG0031900	0.785535	Eukaryotic translation initiation factor 3 subunit E	WD40 repeat-like protein
HORVU.MOREX.r2.5HG0364500	HORVU.MOREX.r2.1HG0031900	0.946495	Translation initiation factor eIF-2B subunit epsilon	WD40 repeat-like protein
HORVU.MOREX.r2.5HG0394640	HORVU.MOREX.r2.1HG0031900	0.813298	Pre-mRNA-processing-splicing factor 8	WD40 repeat-like protein
HORVU.MOREX.r2.5HG0419000	HORVU.MOREX.r2.1HG0031900	0.882546	Actin-related family protein	WD40 repeat-like protein
HORVU.MOREX.r2.3HG0247870	HORVU.MOREX.r2.1HG0031900	0.817404	Methionine-tRNA ligase, putative	WD40 repeat-like protein
HORVU.MOREX.r2.6HG0474430	HORVU.MOREX.r2.1HG0031900	0.863	Actin-related family protein	WD40 repeat-like protein
HORVU.MOREX.r2.4HG0308470	HORVU.MOREX.r2.1HG0031900	0.84605	Eukaryotic translation initiation factor 3 subunit I	WD40 repeat-like protein
HORVU.MOREX.r2.1HG0070120	HORVU.MOREX.r2.1HG0031900	0.832152	RuvB-like helicase	WD40 repeat-like protein
HORVU.MOREX.r2.1HG0032070	HORVU.MOREX.r2.1HG0032070	1	Peroxisome biogenesis protein 12	Peroxisome biogenesis protein 12
HORVU.MOREX.r2.1HG0032090	HORVU.MOREX.r2.1HG0032090	1	Cellulose synthase	Cellulose synthase
HORVU.MOREX.r2.4HG0284050	HORVU.MOREX.r2.1HG0032090	0.913762	Endoglucanase	Cellulose synthase
HORVU.MOREX.r2.2HG0147940	HORVU.MOREX.r2.1HG0032080	0.944724	Eukaryotic translation initiation factor 4G	Eukaryotic translation initiation factor 4E
HORVU.MOREX.r2.1HG0032450	HORVU.MOREX.r2.1HG0032450	1	Fatty acid hydroxylase superfamily	Fatty acid hydroxylase superfamily
HORVU.MOREX.r2.1HG0032460	HORVU.MOREX.r2.1HG0032460	1	Fatty acid hydroxylase superfamily protein	Fatty acid hydroxylase superfamily protein
HORVU.MOREX.r2.2HG0154600	HORVU.MOREX.r2.1HG0032940	0.88099	4-hydroxy-tetrahydrodipicolinate synthase	Phosphoribosylformylglycinamidine synthase family protein
HORVU.MOREX.r2.2HG0170020	HORVU.MOREX.r2.1HG0032940	0.881031	4-hydroxy-tetrahydrodipicolinate synthase	Phosphoribosylformylglycinamidine synthase family protein
HORVU.MOREX.r2.1HG0033180	HORVU.MOREX.r2.1HG0033180	1	Vacuolar protein sorting-associated protein 2-like protein 2	Vacuolar protein sorting-associated protein 2-like protein 2
HORVU.MOREX.r2.5HG0388970	HORVU.MOREX.r2.1HG0033270	0.80648	Serine/threonine protein phosphatase 2a regulatory subunit A, putative	Serine/threonine-protein phosphatase 2A regulatory subunit B'' subunit alpha
HORVU.MOREX.r2.1HG0059230	HORVU.MOREX.r2.1HG0033820	0.854573	Respiratory burst oxidase-like protein	Transporter-related family protein
HORVU.MOREX.r2.7HG0534430	HORVU.MOREX.r2.1HG0033820	0.832817	LMBR1-like membrane protein	Transporter-related family protein
HORVU.MOREX.r2.6HG0515900	HORVU.MOREX.r2.1HG0033820	0.772358	Pyrophosphate-energized vacuolar membrane proton pump	Transporter-related family protein
HORVU.MOREX.r2.4HG0327430	HORVU.MOREX.r2.1HG0033820	0.76843	Transmembrane 9 superfamily member	Transporter-related family protein
HORVU.MOREX.r2.2HG0110730	HORVU.MOREX.r2.1HG0033820	0.796418	Protein DETOXIFICATION	Transporter-related family protein
HORVU.MOREX.r2.2HG0142800	HORVU.MOREX.r2.1HG0033820	0.79561	Endoplasmic reticulum-Golgi intermediate compartment protein 3	Transporter-related family protein
HORVU.MOREX.r2.6HG0519490	HORVU.MOREX.r2.1HG0034150	0.94529	30S ribosomal protein S15	28S ribosomal protein S29, mitochondrial
HORVU.MOREX.r2.7HG0596370	HORVU.MOREX.r2.1HG0034150	0.90087	50S ribosomal protein L1	28S ribosomal protein S29, mitochondrial
HORVU.MOREX.r2.3HG0232100	HORVU.MOREX.r2.1HG0034150	0.895861	50S ribosomal protein L15, putative, expressed	28S ribosomal protein S29, mitochondrial
HORVU.MOREX.r2.3HG0209490	HORVU.MOREX.r2.1HG0034150	0.878887	50S ribosomal protein L3, putative	28S ribosomal protein S29, mitochondrial
HORVU.MOREX.r2.5HG0403140	HORVU.MOREX.r2.1HG0034150	0.918575	50S ribosomal protein L4	28S ribosomal protein S29, mitochondrial
HORVU.MOREX.r2.6HG0457370	HORVU.MOREX.r2.1HG0034150	0.899437	50S ribosomal protein L4	28S ribosomal protein S29, mitochondrial
HORVU.MOREX.r2.4HG0326700	HORVU.MOREX.r2.1HG0034210	0.833784	26S proteasome non-ATPase regulatory subunit 4	Coatomer subunit gamma
HORVU.MOREX.r2.6HG0464080	HORVU.MOREX.r2.1HG0034210	0.922312	26S proteasome non-ATPase regulatory subunit-like protein	Coatomer subunit gamma
HORVU.MOREX.r2.4HG0326110	HORVU.MOREX.r2.1HG0034210	0.948642	Brefeldin A-inhibited guanine nucleotide-exchange protein	Coatomer subunit gamma
HORVU.MOREX.r2.4HG0304810	HORVU.MOREX.r2.1HG0034220	0.823811	Xaa-pro aminopeptidase, putative	Xaa-pro aminopeptidase, putative
HORVU.MOREX.r2.6HG0515310	HORVU.MOREX.r2.1HG0034290	0.912741	RRP12-like protein	40S ribosomal protein S17, putative, expressed
HORVU.MOREX.r2.7HG0584220	HORVU.MOREX.r2.1HG0034290	0.97485	40S ribosomal protein S13	40S ribosomal protein S17, putative, expressed
HORVU.MOREX.r2.5HG0399730	HORVU.MOREX.r2.1HG0034290	0.899123	Eukaryotic translation initiation factor 3 subunit C	40S ribosomal protein S17, putative, expressed
HORVU.MOREX.r2.3HG0252910	HORVU.MOREX.r2.1HG0034290	0.946358	30S ribosomal protein S8, putative	40S ribosomal protein S17, putative, expressed
HORVU.MOREX.r2.5HG0430630	HORVU.MOREX.r2.1HG0034290	0.964123	30S ribosomal protein S13	40S ribosomal protein S17, putative, expressed
HORVU.MOREX.r2.6HG0501530	HORVU.MOREX.r2.1HG0034290	0.917902	UPF0160 protein MYG1, mitochondrial	40S ribosomal protein S17, putative, expressed
HORVU.MOREX.r2.7HG0584290	HORVU.MOREX.r2.1HG0034290	0.938734	40S ribosomal protein S13	40S ribosomal protein S17, putative, expressed
HORVU.MOREX.r2.5HG0378380	HORVU.MOREX.r2.1HG0034290	0.926566	30S ribosomal protein S4	40S ribosomal protein S17, putative, expressed
HORVU.MOREX.r2.7HG0577670	HORVU.MOREX.r2.1HG0034290	0.970572	30S ribosomal protein S3	40S ribosomal protein S17, putative, expressed
HORVU.MOREX.r2.3HG0252280	HORVU.MOREX.r2.1HG0034290	0.984395	30S ribosomal protein S5	40S ribosomal protein S17, putative, expressed
HORVU.MOREX.r2.2HG0103970	HORVU.MOREX.r2.1HG0034290	0.80559	30S ribosomal protein S3	40S ribosomal protein S17, putative, expressed
HORVU.MOREX.r2.6HG0492210	HORVU.MOREX.r2.1HG0034290	0.877224	30S ribosomal protein S17	40S ribosomal protein S17, putative, expressed
HORVU.MOREX.r2.2HG0094430	HORVU.MOREX.r2.1HG0034290	0.882415	Nucleolar protein	40S ribosomal protein S17, putative, expressed
HORVU.MOREX.r2.6HG0452850	HORVU.MOREX.r2.1HG0034290	0.894486	RNA-binding NOB1	40S ribosomal protein S17, putative, expressed
HORVU.MOREX.r2.1HG0026750	HORVU.MOREX.r2.1HG0034290	0.885503	40S ribosomal protein S3a	40S ribosomal protein S17, putative, expressed
HORVU.MOREX.r2.5HG0383630	HORVU.MOREX.r2.1HG0034290	0.924817	30S ribosomal protein S9	40S ribosomal protein S17, putative, expressed
HORVU.MOREX.r2.4HG0332760	HORVU.MOREX.r2.1HG0034290	0.888548	RNA cytidine acetyltransferase	40S ribosomal protein S17, putative, expressed
HORVU.MOREX.r2.3HG0236190	HORVU.MOREX.r2.1HG0034290	0.781719	KRR1 small subunit processome component	40S ribosomal protein S17, putative, expressed
HORVU.MOREX.r2.4HG0294890	HORVU.MOREX.r2.1HG0034290	0.904989	30S ribosomal protein S9	40S ribosomal protein S17, putative, expressed
HORVU.MOREX.r2.1HG0071380	HORVU.MOREX.r2.1HG0034290	0.927031	WD40 repeat-like protein	40S ribosomal protein S17, putative, expressed
HORVU.MOREX.r2.2HG0158350	HORVU.MOREX.r2.1HG0034290	0.957731	30S ribosomal protein S17	40S ribosomal protein S17, putative, expressed
HORVU.MOREX.r2.6HG0516470	HORVU.MOREX.r2.1HG0034290	0.958487	Eukaryotic translation initiation factor 3 subunit G	40S ribosomal protein S17, putative, expressed
HORVU.MOREX.r2.7HG0608850	HORVU.MOREX.r2.1HG0034290	0.961929	30S ribosomal protein S11	40S ribosomal protein S17, putative, expressed
HORVU.MOREX.r2.1HG0059160	HORVU.MOREX.r2.1HG0034290	0.932169	30S ribosomal protein S8, putative	40S ribosomal protein S17, putative, expressed
HORVU.MOREX.r2.7HG0588940	HORVU.MOREX.r2.1HG0034290	0.865821	U3 small nucleolar RNA-associated protein 14	40S ribosomal protein S17, putative, expressed
HORVU.MOREX.r2.5HG0409330	HORVU.MOREX.r2.1HG0034290	0.85328	Nucleolar protein 14	40S ribosomal protein S17, putative, expressed
HORVU.MOREX.r2.5HG0376250	HORVU.MOREX.r2.1HG0034290	0.828463	Nucleolar protein 6	40S ribosomal protein S17, putative, expressed
HORVU.MOREX.r2.5HG0397940	HORVU.MOREX.r2.1HG0034290	0.90094	Ribosome production factor 2-like protein	40S ribosomal protein S17, putative, expressed
HORVU.MOREX.r2.2HG0137270	HORVU.MOREX.r2.1HG0034290	0.964007	30S ribosomal protein S11	40S ribosomal protein S17, putative, expressed
HORVU.MOREX.r2.3HG0256170	HORVU.MOREX.r2.1HG0034290	0.920541	Protein serine/threonine kinase	40S ribosomal protein S17, putative, expressed
HORVU.MOREX.r2.2HG0173950	HORVU.MOREX.r2.1HG0034290	0.90727	Bystin	40S ribosomal protein S17, putative, expressed
HORVU.MOREX.r2.7HG0591270	HORVU.MOREX.r2.1HG0034290	0.89527	Pre-rRNA-processing protein TSR1-like protein	40S ribosomal protein S17, putative, expressed
HORVU.MOREX.r2.1HG0046500	HORVU.MOREX.r2.1HG0034290	0.920283	NAD kinase	40S ribosomal protein S17, putative, expressed
HORVU.MOREX.r2.2HG0100920	HORVU.MOREX.r2.1HG0034290	0.907545	30S ribosomal protein S4	40S ribosomal protein S17, putative, expressed
HORVU.MOREX.r2.4HG0331970	HORVU.MOREX.r2.1HG0034290	0.95287	40S ribosomal protein S3a	40S ribosomal protein S17, putative, expressed
HORVU.MOREX.r2.1HG0018040	HORVU.MOREX.r2.1HG0034290	0.964236	40S ribosomal protein S4	40S ribosomal protein S17, putative, expressed
HORVU.MOREX.r2.4HG0294910	HORVU.MOREX.r2.1HG0034290	0.987743	30S ribosomal protein S9	40S ribosomal protein S17, putative, expressed
HORVU.MOREX.r2.2HG0095700	HORVU.MOREX.r2.1HG0034290	0.888575	Ubiquitin carboxyl-terminal hydrolase	40S ribosomal protein S17, putative, expressed
HORVU.MOREX.r2.7HG0596940	HORVU.MOREX.r2.1HG0034980	0.915525	Thiamine thiazole synthase, chloroplastic	Thioredoxin
HORVU.MOREX.r2.4HG0305230	HORVU.MOREX.r2.1HG0035590	0.804905	Embryo defective 2765	DNA-directed RNA polymerase subunit beta
HORVU.MOREX.r2.2HG0173950	HORVU.MOREX.r2.1HG0035670	0.968181	Bystin	Nucleolar complex protein 2
HORVU.MOREX.r2.1HG0003480	HORVU.MOREX.r2.1HG0035670	0.815999	Pumilio-like protein	Nucleolar complex protein 2
HORVU.MOREX.r2.2HG0105280	HORVU.MOREX.r2.1HG0035670	0.938184	Ribosome biogenesis protein WDR12 homolog	Nucleolar complex protein 2
HORVU.MOREX.r2.6HG0507260	HORVU.MOREX.r2.1HG0035670	0.855903	H/ACA ribonucleoprotein complex subunit 2-like protein	Nucleolar complex protein 2
HORVU.MOREX.r2.7HG0549020	HORVU.MOREX.r2.1HG0035670	0.918168	Nucleolar GTP-binding protein 1	Nucleolar complex protein 2
HORVU.MOREX.r2.5HG0376250	HORVU.MOREX.r2.1HG0035670	0.781169	Nucleolar protein 6	Nucleolar complex protein 2
HORVU.MOREX.r2.6HG0490110	HORVU.MOREX.r2.1HG0035670	0.953485	CCAAT/enhancer-binding protein zeta	Nucleolar complex protein 2
HORVU.MOREX.r2.1HG0035670	HORVU.MOREX.r2.1HG0035670	1	Nucleolar complex protein 2	Nucleolar complex protein 2
HORVU.MOREX.r2.2HG0098990	HORVU.MOREX.r2.1HG0035670	0.894441	Eukaryotic translation initiation factor 6	Nucleolar complex protein 2
HORVU.MOREX.r2.2HG0094430	HORVU.MOREX.r2.1HG0035670	0.936352	Nucleolar protein	Nucleolar complex protein 2
HORVU.MOREX.r2.3HG0236190	HORVU.MOREX.r2.1HG0035670	0.912407	KRR1 small subunit processome component	Nucleolar complex protein 2
HORVU.MOREX.r2.2HG0095700	HORVU.MOREX.r2.1HG0035670	0.855897	Ubiquitin carboxyl-terminal hydrolase	Nucleolar complex protein 2
HORVU.MOREX.r2.1HG0035690	HORVU.MOREX.r2.1HG0035690	1	ALG-2 interacting protein X	ALG-2 interacting protein X
HORVU.MOREX.r2.4HG0282730	HORVU.MOREX.r2.1HG0035690	0.846798	AMSH-like ubiquitin thioesterase 1	ALG-2 interacting protein X
HORVU.MOREX.r2.5HG0421800	HORVU.MOREX.r2.1HG0035900	0.904499	Chaperone protein dnaJ, putative	Alpha-galactosidase
HORVU.MOREX.r2.4HG0331780	HORVU.MOREX.r2.1HG0035900	0.773828	Outer mitochondrial membrane protein porin	Alpha-galactosidase
HORVU.MOREX.r2.1HG0020140	HORVU.MOREX.r2.1HG0036160	0.774696	Receptor-like kinase, putative	Late embryogenesis abundant (LEA) hydroxyproline-rich glycoprotein
HORVU.MOREX.r2.4HG0329100	HORVU.MOREX.r2.1HG0036160	0.780464	Receptor-like kinase	Late embryogenesis abundant (LEA) hydroxyproline-rich glycoprotein
HORVU.MOREX.r2.3HG0201110	HORVU.MOREX.r2.1HG0036160	0.827406	Receptor-like kinase, putative	Late embryogenesis abundant (LEA) hydroxyproline-rich glycoprotein
HORVU.MOREX.r2.1HG0065910	HORVU.MOREX.r2.1HG0036380	0.839985	Flap endonuclease 1	DNA ligase
HORVU.MOREX.r2.2HG0143420	HORVU.MOREX.r2.1HG0036700	0.838377	14-3-3 protein	Protochlorophyllide reductase
HORVU.MOREX.r2.4HG0280720	HORVU.MOREX.r2.1HG0036700	0.787488	GAI-like protein 1	Protochlorophyllide reductase
HORVU.MOREX.r2.1HG0036700	HORVU.MOREX.r2.1HG0036700	1	Protochlorophyllide reductase	Protochlorophyllide reductase
HORVU.MOREX.r2.1HG0036900	HORVU.MOREX.r2.1HG0036900	1	RP/EB family microtubule-associated protein	RP/EB family microtubule-associated protein
HORVU.MOREX.r2.4HG0341290	HORVU.MOREX.r2.1HG0037400	0.835643	Thiol-disulfide oxidoreductase LTO1	Thylakoid lumenal 17.4 kDa protein, chloroplastic
HORVU.MOREX.r2.1HG0037430	HORVU.MOREX.r2.1HG0037430	1	Glutamyl-tRNA reductase	Glutamyl-tRNA reductase
HORVU.MOREX.r2.7HG0568050	HORVU.MOREX.r2.1HG0037450	0.801244	Transmembrane emp24 domain-containing protein	Membrane steroid-binding protein
HORVU.MOREX.r2.7HG0557080	HORVU.MOREX.r2.1HG0037450	0.833621	NHL repeat-containing protein-like	Membrane steroid-binding protein
HORVU.MOREX.r2.3HG0232580	HORVU.MOREX.r2.1HG0037450	0.773594	Splicing factor 3A subunit 3	Membrane steroid-binding protein
HORVU.MOREX.r2.6HG0503490	HORVU.MOREX.r2.1HG0037450	0.774909	WAT1-related protein	Membrane steroid-binding protein
HORVU.MOREX.r2.6HG0468390	HORVU.MOREX.r2.1HG0037450	0.808603	Membrane protein	Membrane steroid-binding protein
HORVU.MOREX.r2.5HG0380200	HORVU.MOREX.r2.1HG0037450	0.771213	Peptidylprolyl isomerase	Membrane steroid-binding protein
HORVU.MOREX.r2.2HG0157340	HORVU.MOREX.r2.1HG0037450	0.806529	Receptor-like kinase	Membrane steroid-binding protein
HORVU.MOREX.r2.5HG0432540	HORVU.MOREX.r2.1HG0037450	0.824196	Protein REVERSION-TO-ETHYLENE SENSITIVITY1	Membrane steroid-binding protein
HORVU.MOREX.r2.2HG0117650	HORVU.MOREX.r2.1HG0037450	0.846584	Organic solute transporter-like	Membrane steroid-binding protein
HORVU.MOREX.r2.4HG0337780	HORVU.MOREX.r2.1HG0037450	0.908325	Receptor-like protein kinase	Membrane steroid-binding protein
HORVU.MOREX.r2.5HG0401430	HORVU.MOREX.r2.1HG0037450	0.779717	Sulfate transporter 1	Membrane steroid-binding protein
HORVU.MOREX.r2.5HG0404270	HORVU.MOREX.r2.1HG0037450	0.817072	Purine permease-like protein	Membrane steroid-binding protein
HORVU.MOREX.r2.6HG0513820	HORVU.MOREX.r2.1HG0037450	0.884676	Sugar transporter family protein	Membrane steroid-binding protein
HORVU.MOREX.r2.7HG0602080	HORVU.MOREX.r2.1HG0037450	0.822844	WAT1-related protein	Membrane steroid-binding protein
HORVU.MOREX.r2.3HG0203430	HORVU.MOREX.r2.1HG0037450	0.853688	Receptor-like kinase	Membrane steroid-binding protein
HORVU.MOREX.r2.7HG0537760	HORVU.MOREX.r2.1HG0037450	0.872436	NRT1/PTR family protein 2.2	Membrane steroid-binding protein
HORVU.MOREX.r2.6HG0491780	HORVU.MOREX.r2.1HG0037450	0.928514	Bidirectional sugar transporter SWEET	Membrane steroid-binding protein
HORVU.MOREX.r2.1HG0050080	HORVU.MOREX.r2.1HG0037450	0.835431	Resistance to phytophthora 1 protein	Membrane steroid-binding protein
HORVU.MOREX.r2.3HG0223950	HORVU.MOREX.r2.1HG0037450	0.769166	dihydroflavonol 4-reductase/flavanone protein	Membrane steroid-binding protein
HORVU.MOREX.r2.6HG0508670	HORVU.MOREX.r2.1HG0037450	0.867668	Nicastrin	Membrane steroid-binding protein
HORVU.MOREX.r2.6HG0497950	HORVU.MOREX.r2.1HG0037450	0.85627	Receptor-like kinase	Membrane steroid-binding protein
HORVU.MOREX.r2.1HG0077180	HORVU.MOREX.r2.1HG0037450	0.913644	dihydroflavonol 4-reductase/flavanone protein	Membrane steroid-binding protein
HORVU.MOREX.r2.3HG0257810	HORVU.MOREX.r2.1HG0037450	0.770347	ATP-binding ABC transporter	Membrane steroid-binding protein
HORVU.MOREX.r2.7HG0598390	HORVU.MOREX.r2.1HG0037450	0.775596	CASP-like protein	Membrane steroid-binding protein
HORVU.MOREX.r2.1HG0073410	HORVU.MOREX.r2.1HG0037450	0.783085	Cold acclimation protein	Membrane steroid-binding protein
HORVU.MOREX.r2.7HG0602800	HORVU.MOREX.r2.1HG0037450	0.848729	Dolichyl-diphosphooligosaccharide--protein glycosyltransferase 48 kDa subunit	Membrane steroid-binding protein
HORVU.MOREX.r2.1HG0070360	HORVU.MOREX.r2.1HG0037450	0.924486	Cytochrome b561 and DOMON domain-containing protein	Membrane steroid-binding protein
HORVU.MOREX.r2.2HG0091570	HORVU.MOREX.r2.1HG0037450	0.898038	Cellulose synthase	Membrane steroid-binding protein
HORVU.MOREX.r2.1HG0037500	HORVU.MOREX.r2.1HG0037500	1	Folylpolyglutamate synthase	Folylpolyglutamate synthase
HORVU.MOREX.r2.1HG0037530	HORVU.MOREX.r2.1HG0037530	1	Malic enzyme	Malic enzyme
HORVU.MOREX.r2.1HG0038910	HORVU.MOREX.r2.1HG0038910	1	protein kinase family protein	protein kinase family protein
HORVU.MOREX.r2.4HG0311100	HORVU.MOREX.r2.1HG0039180	0.814158	14-3-3 protein	Methionine aminopeptidase
HORVU.MOREX.r2.2HG0143420	HORVU.MOREX.r2.1HG0039180	0.803041	14-3-3 protein	Methionine aminopeptidase
HORVU.MOREX.r2.1HG0039580	HORVU.MOREX.r2.1HG0039580	1	Protein kinase family protein	Protein kinase family protein
HORVU.MOREX.r2.7HG0547990	HORVU.MOREX.r2.1HG0039600	0.786042	Protein kinase	Pectinesterase
HORVU.MOREX.r2.1HG0039600	HORVU.MOREX.r2.1HG0039600	1	Pectinesterase	Pectinesterase
HORVU.MOREX.r2.6HG0464080	HORVU.MOREX.r2.1HG0039790	0.835356	26S proteasome non-ATPase regulatory subunit-like protein	Trehalase
HORVU.MOREX.r2.3HG0253630	HORVU.MOREX.r2.1HG0039950	0.776239	2-oxoglutarate-dependent dioxygenase	Kinase family protein
HORVU.MOREX.r2.1HG0039950	HORVU.MOREX.r2.1HG0039950	1	Kinase family protein	Kinase family protein
HORVU.MOREX.r2.1HG0039980	HORVU.MOREX.r2.1HG0039980	1	COP9 signalosome complex subunit 1	COP9 signalosome complex subunit 1
HORVU.MOREX.r2.4HG0332480	HORVU.MOREX.r2.1HG0039980	0.948201	COP9 signalosome complex subunit 4	COP9 signalosome complex subunit 1
HORVU.MOREX.r2.2HG0132970	HORVU.MOREX.r2.1HG0039980	0.812628	Eukaryotic translation initiation factor 3 subunit H	COP9 signalosome complex subunit 1
HORVU.MOREX.r2.1HG0040380	HORVU.MOREX.r2.1HG0040380	1	Nucleosome assembly protein 1-1	Nucleosome assembly protein 1-1
HORVU.MOREX.r2.1HG0040810	HORVU.MOREX.r2.1HG0040810	1	C-terminal binding protein	C-terminal binding protein
HORVU.MOREX.r2.5HG0423130	HORVU.MOREX.r2.1HG0040860	0.931601	WRKY transcription factor	Mitogen-activated protein kinase
HORVU.MOREX.r2.4HG0284540	HORVU.MOREX.r2.1HG0040860	0.958644	WRKY transcription factor	Mitogen-activated protein kinase
HORVU.MOREX.r2.5HG0406830	HORVU.MOREX.r2.1HG0040860	0.82062	2-oxoglutarate (2OG) and Fe(II)-dependent oxygenase superfamily protein	Mitogen-activated protein kinase
HORVU.MOREX.r2.2HG0117730	HORVU.MOREX.r2.1HG0040860	0.801659	Squamosa promoter-binding protein	Mitogen-activated protein kinase
HORVU.MOREX.r2.7HG0609340	HORVU.MOREX.r2.1HG0040860	0.818384	Nuclear transcription factor Y subunit B	Mitogen-activated protein kinase
HORVU.MOREX.r2.5HG0383720	HORVU.MOREX.r2.1HG0040860	0.829531	RNA-binding domain CCCH-type zinc finger protein	Mitogen-activated protein kinase
HORVU.MOREX.r2.7HG0616260	HORVU.MOREX.r2.1HG0040860	0.794856	WRKY transcription factor	Mitogen-activated protein kinase
HORVU.MOREX.r2.5HG0368460	HORVU.MOREX.r2.1HG0040860	0.846414	Nucleoside diphosphate kinase	Mitogen-activated protein kinase
HORVU.MOREX.r2.4HG0328320	HORVU.MOREX.r2.1HG0040860	0.79534	Inositol-tetrakisphosphate 1-kinase	Mitogen-activated protein kinase
HORVU.MOREX.r2.6HG0505960	HORVU.MOREX.r2.1HG0040860	0.897889	Dual specificity protein phosphatase, putative	Mitogen-activated protein kinase
HORVU.MOREX.r2.4HG0282650	HORVU.MOREX.r2.1HG0040860	0.809514	Inositol-tetrakisphosphate 1-kinase	Mitogen-activated protein kinase
HORVU.MOREX.r2.7HG0562570	HORVU.MOREX.r2.1HG0040860	0.769215	Nuclear factor Y subunit C	Mitogen-activated protein kinase
HORVU.MOREX.r2.7HG0590210	HORVU.MOREX.r2.1HG0040860	0.813211	E3 ubiquitin-protein ligase	Mitogen-activated protein kinase
HORVU.MOREX.r2.3HG0201840	HORVU.MOREX.r2.1HG0040860	0.768044	Kinase family protein	Mitogen-activated protein kinase
HORVU.MOREX.r2.2HG0154950	HORVU.MOREX.r2.1HG0040860	0.873268	F-box protein PP2-A13	Mitogen-activated protein kinase
HORVU.MOREX.r2.3HG0207340	HORVU.MOREX.r2.1HG0040860	0.869893	E3 ubiquitin-protein ligase	Mitogen-activated protein kinase
HORVU.MOREX.r2.4HG0339840	HORVU.MOREX.r2.1HG0040860	0.886788	Receptor-like kinase	Mitogen-activated protein kinase
HORVU.MOREX.r2.5HG0376930	HORVU.MOREX.r2.1HG0040860	0.800016	MYB transcription factor	Mitogen-activated protein kinase
HORVU.MOREX.r2.5HG0409500	HORVU.MOREX.r2.1HG0040860	0.869849	pfkB-like carbohydrate kinase family protein	Mitogen-activated protein kinase
HORVU.MOREX.r2.4HG0325810	HORVU.MOREX.r2.1HG0040860	0.803287	Nuclear factor Y subunit C	Mitogen-activated protein kinase
HORVU.MOREX.r2.5HG0381450	HORVU.MOREX.r2.1HG0040860	0.931335	Cytochrome P450	Mitogen-activated protein kinase
HORVU.MOREX.r2.2HG0146780	HORVU.MOREX.r2.1HG0040860	0.837338	U-box domain-containing family protein	Mitogen-activated protein kinase
HORVU.MOREX.r2.3HG0268900	HORVU.MOREX.r2.1HG0040860	0.827102	Calcium-binding protein	Mitogen-activated protein kinase
HORVU.MOREX.r2.7HG0617750	HORVU.MOREX.r2.1HG0040860	0.836212	Calcium-binding protein	Mitogen-activated protein kinase
HORVU.MOREX.r2.3HG0226490	HORVU.MOREX.r2.1HG0040860	0.927888	Calcium-dependent protein kinase	Mitogen-activated protein kinase
HORVU.MOREX.r2.6HG0489930	HORVU.MOREX.r2.1HG0040860	0.84536	Elongation factor Tu	Mitogen-activated protein kinase
HORVU.MOREX.r2.7HG0621710	HORVU.MOREX.r2.1HG0040860	0.922275	Clathrin light chain	Mitogen-activated protein kinase
HORVU.MOREX.r2.2HG0171110	HORVU.MOREX.r2.1HG0040860	0.922512	Cyclic nucleotide-gated channel	Mitogen-activated protein kinase
HORVU.MOREX.r2.3HG0240310	HORVU.MOREX.r2.1HG0040860	0.907793	Auxin response factor	Mitogen-activated protein kinase
HORVU.MOREX.r2.3HG0207310	HORVU.MOREX.r2.1HG0040860	0.837938	E3 ubiquitin-protein ligase	Mitogen-activated protein kinase
HORVU.MOREX.r2.2HG0091490	HORVU.MOREX.r2.1HG0040860	0.764024	RNA-binding domain CCCH-type zinc finger protein	Mitogen-activated protein kinase
HORVU.MOREX.r2.3HG0250370	HORVU.MOREX.r2.1HG0040860	0.837242	MYB transcription factor	Mitogen-activated protein kinase
HORVU.MOREX.r2.5HG0424400	HORVU.MOREX.r2.1HG0040860	0.858436	Transcriptional adapter ADA2	Mitogen-activated protein kinase
HORVU.MOREX.r2.5HG0359860	HORVU.MOREX.r2.1HG0040860	0.768858	Calmodulin	Mitogen-activated protein kinase
HORVU.MOREX.r2.7HG0617740	HORVU.MOREX.r2.1HG0040860	0.889755	Calcium-binding protein	Mitogen-activated protein kinase
HORVU.MOREX.r2.5HG0396940	HORVU.MOREX.r2.1HG0040860	0.846014	Myb factor	Mitogen-activated protein kinase
HORVU.MOREX.r2.5HG0359840	HORVU.MOREX.r2.1HG0040860	0.903604	Calmodulin	Mitogen-activated protein kinase
HORVU.MOREX.r2.1HG0040860	HORVU.MOREX.r2.1HG0040860	1	Mitogen-activated protein kinase	Mitogen-activated protein kinase
HORVU.MOREX.r2.1HG0040870	HORVU.MOREX.r2.1HG0040870	1	PPPDE putative thiol peptidase family protein	PPPDE putative thiol peptidase family protein
HORVU.MOREX.r2.1HG0059170	HORVU.MOREX.r2.1HG0040870	0.779978	Ras-related protein-like protein	PPPDE putative thiol peptidase family protein
HORVU.MOREX.r2.4HG0295780	HORVU.MOREX.r2.1HG0040870	0.839232	PRA1 family protein	PPPDE putative thiol peptidase family protein
HORVU.MOREX.r2.5HG0433020	HORVU.MOREX.r2.1HG0040870	0.797575	Actin cross-linking protein, putative	PPPDE putative thiol peptidase family protein
HORVU.MOREX.r2.5HG0385110	HORVU.MOREX.r2.1HG0040870	0.835727	PRA1 family protein	PPPDE putative thiol peptidase family protein
HORVU.MOREX.r2.1HG0057800	HORVU.MOREX.r2.1HG0040870	0.817497	PRA1 family protein	PPPDE putative thiol peptidase family protein
HORVU.MOREX.r2.1HG0041310	HORVU.MOREX.r2.1HG0041310	1	Abscisic acid receptor	Abscisic acid receptor
HORVU.MOREX.r2.3HG0201670	HORVU.MOREX.r2.1HG0041320	0.85452	Mitochondrial carrier family	Mitochondrial carrier protein
HORVU.MOREX.r2.5HG0377370	HORVU.MOREX.r2.1HG0041320	0.849847	NAD-dependent protein deacylase	Mitochondrial carrier protein
HORVU.MOREX.r2.1HG0041620	HORVU.MOREX.r2.1HG0041620	1	Basic helix loop helix (BHLH) family transcription factor	Basic helix loop helix (BHLH) family transcription factor
HORVU.MOREX.r2.5HG0385350	HORVU.MOREX.r2.1HG0041900	0.88534	Ubiquitin activating enzyme E1	TOM1-like protein 2
HORVU.MOREX.r2.4HG0309500	HORVU.MOREX.r2.1HG0042050	0.778696	ER membrane protein complex subunit 4	Antiholin-like protein lrgB
HORVU.MOREX.r2.1HG0042270	HORVU.MOREX.r2.1HG0042270	1	Kinase-like protein	Kinase-like protein
HORVU.MOREX.r2.1HG0043060	HORVU.MOREX.r2.1HG0043060	1	Ubiquitin-like protein	Ubiquitin-like protein
HORVU.MOREX.r2.5HG0397220	HORVU.MOREX.r2.1HG0043060	0.807302	Uv excision repair protein rad23, putative	Ubiquitin-like protein
HORVU.MOREX.r2.1HG0043190	HORVU.MOREX.r2.1HG0043190	1	Protein kinase family protein, putative, expressed	Protein kinase family protein, putative, expressed
HORVU.MOREX.r2.3HG0201840	HORVU.MOREX.r2.1HG0043190	0.81317	Kinase family protein	Protein kinase family protein, putative, expressed
HORVU.MOREX.r2.6HG0469000	HORVU.MOREX.r2.1HG0043190	0.817855	Polyubiquitin	Protein kinase family protein, putative, expressed
HORVU.MOREX.r2.7HG0619420	HORVU.MOREX.r2.1HG0043460	0.831389	Chaperone protein htpG family protein	Methyltransferase
HORVU.MOREX.r2.1HG0043550	HORVU.MOREX.r2.1HG0043550	1	Protein phosphatase 2C	Protein phosphatase 2C
HORVU.MOREX.r2.5HG0434100	HORVU.MOREX.r2.1HG0043590	0.855186	Squalene synthase	Methylsterol monooxygenase 1-2
HORVU.MOREX.r2.1HG0043590	HORVU.MOREX.r2.1HG0043590	1	Methylsterol monooxygenase 1-2	Methylsterol monooxygenase 1-2
HORVU.MOREX.r2.5HG0419570	HORVU.MOREX.r2.1HG0043660	0.857826	Transmembrane 9 superfamily member	Cytochrome c-type biogenesis protein CcmE
HORVU.MOREX.r2.5HG0423360	HORVU.MOREX.r2.1HG0043660	0.920159	Magnesium transporter MRS2-like protein	Cytochrome c-type biogenesis protein CcmE
HORVU.MOREX.r2.7HG0588100	HORVU.MOREX.r2.1HG0043660	0.803245	Glucan endo-1,3-beta-glucosidase, putative	Cytochrome c-type biogenesis protein CcmE
HORVU.MOREX.r2.6HG0519460	HORVU.MOREX.r2.1HG0043700	0.886998	UDP-N-acetylglucosamine--N-acetylmuramyl-(Pentapeptide) pyrophosphoryl-undecaprenol N-acetylglucosamine transferase	Exostosin-like glycosyltransferase
HORVU.MOREX.r2.4HG0316820	HORVU.MOREX.r2.1HG0043750	0.778095	transcription factor-like protein	Coiled-coil domain-containing protein 132
HORVU.MOREX.r2.7HG0537760	HORVU.MOREX.r2.1HG0043780	0.791129	NRT1/PTR family protein 2.2	Cytochrome P450 family protein, expressed
HORVU.MOREX.r2.1HG0043940	HORVU.MOREX.r2.1HG0043940	1	Translocase of chloroplast	Translocase of chloroplast
HORVU.MOREX.r2.3HG0232920	HORVU.MOREX.r2.1HG0044030	0.909973	Guanine nucleotide-binding protein beta subunit-like protein	Branched-chain-amino-acid aminotransferase
HORVU.MOREX.r2.1HG0069340	HORVU.MOREX.r2.1HG0044030	0.835176	Guanine nucleotide-binding protein subunit beta-1	Branched-chain-amino-acid aminotransferase
HORVU.MOREX.r2.1HG0044030	HORVU.MOREX.r2.1HG0044030	1	Branched-chain-amino-acid aminotransferase	Branched-chain-amino-acid aminotransferase
HORVU.MOREX.r2.1HG0044450	HORVU.MOREX.r2.1HG0044450	1	Oxysterol-binding protein, expressed	Oxysterol-binding protein, expressed
HORVU.MOREX.r2.6HG0520780	HORVU.MOREX.r2.1HG0044600	0.878682	Clathrin interactor EPSIN-like protein	AP-3 complex subunit delta
HORVU.MOREX.r2.7HG0532700	HORVU.MOREX.r2.1HG0044600	0.876243	Syntaxin	AP-3 complex subunit delta
HORVU.MOREX.r2.1HG0044700	HORVU.MOREX.r2.1HG0044700	1	CCR4-NOT transcription complex subunit 1	CCR4-NOT transcription complex subunit 1
HORVU.MOREX.r2.1HG0049050	HORVU.MOREX.r2.1HG0044930	0.806125	Ran-binding protein 1 domain-containing	Maturase
HORVU.MOREX.r2.7HG0608910	HORVU.MOREX.r2.1HG0044970	0.923783	Glutamate receptor	Camphor resistance CrcB family protein
HORVU.MOREX.r2.5HG0380200	HORVU.MOREX.r2.1HG0044970	0.822499	Peptidylprolyl isomerase	Camphor resistance CrcB family protein
HORVU.MOREX.r2.5HG0367400	HORVU.MOREX.r2.1HG0044970	0.791191	Lysine/histidine transporter	Camphor resistance CrcB family protein
HORVU.MOREX.r2.7HG0529000	HORVU.MOREX.r2.1HG0044970	0.815611	WAT1-related protein	Camphor resistance CrcB family protein
HORVU.MOREX.r2.6HG0491780	HORVU.MOREX.r2.1HG0044970	0.838788	Bidirectional sugar transporter SWEET	Camphor resistance CrcB family protein
HORVU.MOREX.r2.3HG0240030	HORVU.MOREX.r2.1HG0044970	0.779446	tobamovirus multiplication protein	Camphor resistance CrcB family protein
HORVU.MOREX.r2.6HG0456210	HORVU.MOREX.r2.1HG0044970	0.782139	Protein DETOXIFICATION	Camphor resistance CrcB family protein
HORVU.MOREX.r2.1HG0073230	HORVU.MOREX.r2.1HG0044970	0.779535	Kinase family protein	Camphor resistance CrcB family protein
HORVU.MOREX.r2.1HG0066850	HORVU.MOREX.r2.1HG0044970	0.822325	Glycerophosphodiester phosphodiesterase	Camphor resistance CrcB family protein
HORVU.MOREX.r2.5HG0432540	HORVU.MOREX.r2.1HG0044970	0.850684	Protein REVERSION-TO-ETHYLENE SENSITIVITY1	Camphor resistance CrcB family protein
HORVU.MOREX.r2.4HG0295800	HORVU.MOREX.r2.1HG0044970	0.844803	Protein DETOXIFICATION	Camphor resistance CrcB family protein
HORVU.MOREX.r2.7HG0583590	HORVU.MOREX.r2.1HG0044970	0.809278	Amino acid transporter, putative	Camphor resistance CrcB family protein
HORVU.MOREX.r2.1HG0053940	HORVU.MOREX.r2.1HG0044970	0.76442	1-acyl-sn-glycerol-3-phosphate acyltransferase	Camphor resistance CrcB family protein
HORVU.MOREX.r2.6HG0490180	HORVU.MOREX.r2.1HG0044970	0.809886	transmembrane protein	Camphor resistance CrcB family protein
HORVU.MOREX.r2.2HG0155090	HORVU.MOREX.r2.1HG0044970	0.859519	Cytochrome P450	Camphor resistance CrcB family protein
HORVU.MOREX.r2.7HG0534430	HORVU.MOREX.r2.1HG0044970	0.865872	LMBR1-like membrane protein	Camphor resistance CrcB family protein
HORVU.MOREX.r2.6HG0508670	HORVU.MOREX.r2.1HG0044970	0.786962	Nicastrin	Camphor resistance CrcB family protein
HORVU.MOREX.r2.5HG0419570	HORVU.MOREX.r2.1HG0044970	0.764854	Transmembrane 9 superfamily member	Camphor resistance CrcB family protein
HORVU.MOREX.r2.3HG0205390	HORVU.MOREX.r2.1HG0044970	0.872006	Gdt1-like protein chloroplastic-like	Camphor resistance CrcB family protein
HORVU.MOREX.r2.2HG0124860	HORVU.MOREX.r2.1HG0044970	0.82768	Receptor protein kinase-like protein	Camphor resistance CrcB family protein
HORVU.MOREX.r2.3HG0246490	HORVU.MOREX.r2.1HG0044970	0.772502	Protein kinase, putative	Camphor resistance CrcB family protein
HORVU.MOREX.r2.7HG0595380	HORVU.MOREX.r2.1HG0044970	0.77294	Potassium efflux antiporter	Camphor resistance CrcB family protein
HORVU.MOREX.r2.3HG0203430	HORVU.MOREX.r2.1HG0044970	0.855595	Receptor-like kinase	Camphor resistance CrcB family protein
HORVU.MOREX.r2.6HG0513820	HORVU.MOREX.r2.1HG0044970	0.768517	Sugar transporter family protein	Camphor resistance CrcB family protein
HORVU.MOREX.r2.3HG0202960	HORVU.MOREX.r2.1HG0044970	0.85862	Alkaline phytoceramidase (APHC)	Camphor resistance CrcB family protein
HORVU.MOREX.r2.4HG0281220	HORVU.MOREX.r2.1HG0044970	0.838066	Receptor-like kinase	Camphor resistance CrcB family protein
HORVU.MOREX.r2.1HG0047070	HORVU.MOREX.r2.1HG0044970	0.792337	Signal peptidase I	Camphor resistance CrcB family protein
HORVU.MOREX.r2.3HG0264820	HORVU.MOREX.r2.1HG0044970	0.781752	Sugar transporter, putative	Camphor resistance CrcB family protein
HORVU.MOREX.r2.4HG0328220	HORVU.MOREX.r2.1HG0044970	0.82006	Protein DETOXIFICATION	Camphor resistance CrcB family protein
HORVU.MOREX.r2.7HG0567960	HORVU.MOREX.r2.1HG0044970	0.842201	Nodulin-like / Major Facilitator Superfamily protein	Camphor resistance CrcB family protein
HORVU.MOREX.r2.5HG0424570	HORVU.MOREX.r2.1HG0044970	0.79241	Potassium channel	Camphor resistance CrcB family protein
HORVU.MOREX.r2.4HG0327430	HORVU.MOREX.r2.1HG0044970	0.821521	Transmembrane 9 superfamily member	Camphor resistance CrcB family protein
HORVU.MOREX.r2.4HG0344600	HORVU.MOREX.r2.1HG0044970	0.794896	UDP-galactose transporter	Camphor resistance CrcB family protein
HORVU.MOREX.r2.1HG0003750	HORVU.MOREX.r2.1HG0044970	0.765007	Rab5-interacting family protein	Camphor resistance CrcB family protein
HORVU.MOREX.r2.2HG0097480	HORVU.MOREX.r2.1HG0044970	0.834165	E3 Ubiquitin ligase family protein	Camphor resistance CrcB family protein
HORVU.MOREX.r2.2HG0115500	HORVU.MOREX.r2.1HG0044970	0.910649	Glutamate receptor	Camphor resistance CrcB family protein
HORVU.MOREX.r2.6HG0489200	HORVU.MOREX.r2.1HG0044970	0.924228	Alkaline phosphatase D	Camphor resistance CrcB family protein
HORVU.MOREX.r2.3HG0221890	HORVU.MOREX.r2.1HG0045430	0.841358	Protein phosphatase 2C	Calcineurin B-like protein
HORVU.MOREX.r2.1HG0045480	HORVU.MOREX.r2.1HG0045480	1	Polyadenylate-binding protein family protein	Polyadenylate-binding protein family protein
HORVU.MOREX.r2.1HG0033530	HORVU.MOREX.r2.1HG0045540	0.812675	Malate dehydrogenase	Nucleoside diphosphate kinase
HORVU.MOREX.r2.4HG0281250	HORVU.MOREX.r2.1HG0045540	0.811788	Phosphoglucosamine mutase	Nucleoside diphosphate kinase
HORVU.MOREX.r2.1HG0045540	HORVU.MOREX.r2.1HG0045540	1	Nucleoside diphosphate kinase	Nucleoside diphosphate kinase
HORVU.MOREX.r2.4HG0284310	HORVU.MOREX.r2.1HG0045540	0.823921	Cyclin-like protein	Nucleoside diphosphate kinase
HORVU.MOREX.r2.4HG0293380	HORVU.MOREX.r2.1HG0045700	0.832719	BTB/POZ domain-containing protein	Ethylene-responsive transcription factor
HORVU.MOREX.r2.3HG0232920	HORVU.MOREX.r2.1HG0045700	0.820465	Guanine nucleotide-binding protein beta subunit-like protein	Ethylene-responsive transcription factor
HORVU.MOREX.r2.1HG0069340	HORVU.MOREX.r2.1HG0045830	0.822602	Guanine nucleotide-binding protein subunit beta-1	Dual specificity protein phosphatase
HORVU.MOREX.r2.1HG0045970	HORVU.MOREX.r2.1HG0045970	1	8-amino-7-oxononanoate synthase	8-amino-7-oxononanoate synthase
HORVU.MOREX.r2.3HG0236190	HORVU.MOREX.r2.1HG0046370	0.827587	KRR1 small subunit processome component	Small nuclear ribonucleoprotein family protein
HORVU.MOREX.r2.1HG0046370	HORVU.MOREX.r2.1HG0046370	1	Small nuclear ribonucleoprotein family protein	Small nuclear ribonucleoprotein family protein
HORVU.MOREX.r2.1HG0078440	HORVU.MOREX.r2.1HG0046370	0.799207	Small nuclear ribonucleoprotein	Small nuclear ribonucleoprotein family protein
HORVU.MOREX.r2.6HG0501850	HORVU.MOREX.r2.1HG0046460	0.895346	AP-2 complex subunit mu	50S ribosomal protein L1
HORVU.MOREX.r2.1HG0046500	HORVU.MOREX.r2.1HG0046500	1	NAD kinase	NAD kinase
HORVU.MOREX.r2.4HG0335030	HORVU.MOREX.r2.1HG0046570	0.913212	Glutathione reductase	UDP-sulfoquinovose synthase
HORVU.MOREX.r2.3HG0235810	HORVU.MOREX.r2.1HG0046570	0.92619	Glycine dehydrogenase decarboxylating protein	UDP-sulfoquinovose synthase
HORVU.MOREX.r2.1HG0000700	HORVU.MOREX.r2.1HG0047060	0.800598	Transcription initiation factor TFIID subunit 6	DNA-directed RNA polymerase
HORVU.MOREX.r2.1HG0030920	HORVU.MOREX.r2.1HG0047060	0.859427	Polyadenylate-binding protein	DNA-directed RNA polymerase
HORVU.MOREX.r2.5HG0399730	HORVU.MOREX.r2.1HG0047060	0.920287	Eukaryotic translation initiation factor 3 subunit C	DNA-directed RNA polymerase
HORVU.MOREX.r2.7HG0617640	HORVU.MOREX.r2.1HG0047060	0.965256	Isoleucine--tRNA ligase	DNA-directed RNA polymerase
HORVU.MOREX.r2.5HG0441020	HORVU.MOREX.r2.1HG0047060	0.970283	DNA-directed RNA polymerase subunit	DNA-directed RNA polymerase
HORVU.MOREX.r2.5HG0406360	HORVU.MOREX.r2.1HG0047060	0.86787	Eukaryotic translation initiation factor 3 subunit E	DNA-directed RNA polymerase
HORVU.MOREX.r2.1HG0028810	HORVU.MOREX.r2.1HG0047060	0.942066	Methylthioribose-1-phosphate isomerase	DNA-directed RNA polymerase
HORVU.MOREX.r2.1HG0070120	HORVU.MOREX.r2.1HG0047060	0.893434	RuvB-like helicase	DNA-directed RNA polymerase
HORVU.MOREX.r2.2HG0094430	HORVU.MOREX.r2.1HG0047060	0.960223	Nucleolar protein	DNA-directed RNA polymerase
HORVU.MOREX.r2.3HG0236190	HORVU.MOREX.r2.1HG0047060	0.884095	KRR1 small subunit processome component	DNA-directed RNA polymerase
HORVU.MOREX.r2.1HG0047060	HORVU.MOREX.r2.1HG0047060	1	DNA-directed RNA polymerase	DNA-directed RNA polymerase
HORVU.MOREX.r2.5HG0411320	HORVU.MOREX.r2.1HG0047060	0.855945	ATP-dependent zinc metalloprotease FtsH	DNA-directed RNA polymerase
HORVU.MOREX.r2.4HG0343110	HORVU.MOREX.r2.1HG0047060	0.923206	WD40 repeat-like protein	DNA-directed RNA polymerase
HORVU.MOREX.r2.5HG0394640	HORVU.MOREX.r2.1HG0047060	0.898848	Pre-mRNA-processing-splicing factor 8	DNA-directed RNA polymerase
HORVU.MOREX.r2.6HG0458540	HORVU.MOREX.r2.1HG0047060	0.894553	Eukaryotic translation initiation factor 3 subunit F	DNA-directed RNA polymerase
HORVU.MOREX.r2.6HG0472140	HORVU.MOREX.r2.1HG0047060	0.784597	DNA-directed RNA polymerase subunit beta	DNA-directed RNA polymerase
HORVU.MOREX.r2.6HG0474430	HORVU.MOREX.r2.1HG0047060	0.829114	Actin-related family protein	DNA-directed RNA polymerase
HORVU.MOREX.r2.6HG0469590	HORVU.MOREX.r2.1HG0047060	0.946704	DNA-directed RNA polymerase subunit	DNA-directed RNA polymerase
HORVU.MOREX.r2.5HG0390780	HORVU.MOREX.r2.1HG0047060	0.893404	WD-repeat protein, putative	DNA-directed RNA polymerase
HORVU.MOREX.r2.6HG0460520	HORVU.MOREX.r2.1HG0047060	0.955688	P-loop containing nucleoside triphosphate hydrolases superfamily protein	DNA-directed RNA polymerase
HORVU.MOREX.r2.5HG0419000	HORVU.MOREX.r2.1HG0047060	0.838806	Actin-related family protein	DNA-directed RNA polymerase
HORVU.MOREX.r2.5HG0364500	HORVU.MOREX.r2.1HG0047060	0.918973	Translation initiation factor eIF-2B subunit epsilon	DNA-directed RNA polymerase
HORVU.MOREX.r2.1HG0035590	HORVU.MOREX.r2.1HG0047060	0.909966	DNA-directed RNA polymerase subunit beta	DNA-directed RNA polymerase
HORVU.MOREX.r2.2HG0098010	HORVU.MOREX.r2.1HG0047060	0.771662	Pre-mRNA-splicing factor SYF1	DNA-directed RNA polymerase
HORVU.MOREX.r2.2HG0095700	HORVU.MOREX.r2.1HG0047060	0.94527	Ubiquitin carboxyl-terminal hydrolase	DNA-directed RNA polymerase
HORVU.MOREX.r2.1HG0031900	HORVU.MOREX.r2.1HG0047060	0.919331	WD40 repeat-like protein	DNA-directed RNA polymerase
HORVU.MOREX.r2.1HG0047070	HORVU.MOREX.r2.1HG0047070	1	Signal peptidase I	Signal peptidase I
HORVU.MOREX.r2.4HG0311100	HORVU.MOREX.r2.1HG0047450	0.806199	14-3-3 protein	Nascent polypeptide-associated complex subunit alpha-like protein
HORVU.MOREX.r2.6HG0521660	HORVU.MOREX.r2.1HG0047820	0.800901	Transcriptional corepressor LEUNIG	Histone H2B
HORVU.MOREX.r2.6HG0521660	HORVU.MOREX.r2.1HG0047880	0.774395	Transcriptional corepressor LEUNIG	Histone H2B
HORVU.MOREX.r2.1HG0048100	HORVU.MOREX.r2.1HG0048100	1	UDP-glucuronate decarboxylase protein 6	UDP-glucuronate decarboxylase protein 6
HORVU.MOREX.r2.1HG0048660	HORVU.MOREX.r2.1HG0048660	1	Serine/threonine-protein kinase	Serine/threonine-protein kinase
HORVU.MOREX.r2.1HG0042870	HORVU.MOREX.r2.1HG0048790	0.780959	MLO-like protein	CAAX prenyl protease 2
HORVU.MOREX.r2.7HG0583590	HORVU.MOREX.r2.1HG0048790	0.835546	Amino acid transporter, putative	CAAX prenyl protease 2
HORVU.MOREX.r2.7HG0612440	HORVU.MOREX.r2.1HG0048790	0.801182	LEM3 (Ligand-effect modulator 3)-like	CAAX prenyl protease 2
HORVU.MOREX.r2.5HG0423810	HORVU.MOREX.r2.1HG0048790	0.804399	Tryptophan RNA-binding attenuator-like protein	CAAX prenyl protease 2
HORVU.MOREX.r2.6HG0522040	HORVU.MOREX.r2.1HG0049020	0.802166	Receptor-like kinase	Trichome birefringence-like protein
HORVU.MOREX.r2.5HG0407600	HORVU.MOREX.r2.1HG0049030	0.788477	WD-repeat cell cycle regulatory protein	Anaphase-promoting complex subunit 1
HORVU.MOREX.r2.1HG0049040	HORVU.MOREX.r2.1HG0049040	1	AMP deaminase	AMP deaminase
HORVU.MOREX.r2.5HG0365730	HORVU.MOREX.r2.1HG0049050	0.785501	Nuclear pore complex protein NUP93A	Ran-binding protein 1 domain-containing
HORVU.MOREX.r2.1HG0049050	HORVU.MOREX.r2.1HG0049050	1	Ran-binding protein 1 domain-containing	Ran-binding protein 1 domain-containing
HORVU.MOREX.r2.2HG0149380	HORVU.MOREX.r2.1HG0049370	0.866213	GTF2H2	Importin subunit beta-1
HORVU.MOREX.r2.4HG0286500	HORVU.MOREX.r2.1HG0049370	0.8332	Eukaryotic translation initiation factor 3 subunit B	Importin subunit beta-1
HORVU.MOREX.r2.2HG0116140	HORVU.MOREX.r2.1HG0049370	0.949228	RNA-binding family protein	Importin subunit beta-1
HORVU.MOREX.r2.2HG0094430	HORVU.MOREX.r2.1HG0049370	0.952029	Nucleolar protein	Importin subunit beta-1
HORVU.MOREX.r2.5HG0365730	HORVU.MOREX.r2.1HG0049370	0.915759	Nuclear pore complex protein NUP93A	Importin subunit beta-1
HORVU.MOREX.r2.1HG0069590	HORVU.MOREX.r2.1HG0049370	0.990592	Nucleolar family protein	Importin subunit beta-1
HORVU.MOREX.r2.4HG0279970	HORVU.MOREX.r2.1HG0049370	0.90049	Pescadillo homolog	Importin subunit beta-1
HORVU.MOREX.r2.6HG0489680	HORVU.MOREX.r2.1HG0049370	0.771515	Ribosomal RNA-processing protein 8	Importin subunit beta-1
HORVU.MOREX.r2.7HG0595620	HORVU.MOREX.r2.1HG0049370	0.948101	40S ribosomal protein S24	Importin subunit beta-1
HORVU.MOREX.r2.1HG0049370	HORVU.MOREX.r2.1HG0049370	1	Importin subunit beta-1	Importin subunit beta-1
HORVU.MOREX.r2.6HG0484240	HORVU.MOREX.r2.1HG0049370	0.961668	40S ribosomal protein S24	Importin subunit beta-1
HORVU.MOREX.r2.7HG0534430	HORVU.MOREX.r2.1HG0050560	0.848522	LMBR1-like membrane protein	Energy-coupling factor transporter transmembrane protein EcfT
HORVU.MOREX.r2.6HG0489200	HORVU.MOREX.r2.1HG0050560	0.843816	Alkaline phosphatase D	Energy-coupling factor transporter transmembrane protein EcfT
HORVU.MOREX.r2.6HG0515900	HORVU.MOREX.r2.1HG0050560	0.766716	Pyrophosphate-energized vacuolar membrane proton pump	Energy-coupling factor transporter transmembrane protein EcfT
HORVU.MOREX.r2.7HG0613640	HORVU.MOREX.r2.1HG0050560	0.868043	transmembrane protein, putative (DUF679)	Energy-coupling factor transporter transmembrane protein EcfT
HORVU.MOREX.r2.2HG0171110	HORVU.MOREX.r2.1HG0050560	0.909169	Cyclic nucleotide-gated channel	Energy-coupling factor transporter transmembrane protein EcfT
HORVU.MOREX.r2.6HG0522160	HORVU.MOREX.r2.1HG0050560	0.840343	transmembrane protein, putative (DUF679)	Energy-coupling factor transporter transmembrane protein EcfT
HORVU.MOREX.r2.6HG0522040	HORVU.MOREX.r2.1HG0050560	0.809575	Receptor-like kinase	Energy-coupling factor transporter transmembrane protein EcfT
HORVU.MOREX.r2.4HG0327430	HORVU.MOREX.r2.1HG0050560	0.912534	Transmembrane 9 superfamily member	Energy-coupling factor transporter transmembrane protein EcfT
HORVU.MOREX.r2.5HG0423360	HORVU.MOREX.r2.1HG0050560	0.812893	Magnesium transporter MRS2-like protein	Energy-coupling factor transporter transmembrane protein EcfT
HORVU.MOREX.r2.1HG0023650	HORVU.MOREX.r2.1HG0050560	0.784293	Derlin	Energy-coupling factor transporter transmembrane protein EcfT
HORVU.MOREX.r2.7HG0583590	HORVU.MOREX.r2.1HG0050560	0.932133	Amino acid transporter, putative	Energy-coupling factor transporter transmembrane protein EcfT
HORVU.MOREX.r2.2HG0146410	HORVU.MOREX.r2.1HG0050560	0.918084	Receptor-like kinase	Energy-coupling factor transporter transmembrane protein EcfT
HORVU.MOREX.r2.1HG0074180	HORVU.MOREX.r2.1HG0050500	0.772166	Serine protease	Thylakoid lumen 18.3 kDa family protein
HORVU.MOREX.r2.7HG0599740	HORVU.MOREX.r2.1HG0050780	0.777292	PLATZ transcription factor family protein	ARM REPEAT PROTEIN INTERACTING WITH ABF2
HORVU.MOREX.r2.1HG0050900	HORVU.MOREX.r2.1HG0050900	1	Protein WEAK CHLOROPLAST MOVEMENT UNDER BLUE LIGHT 1	Protein WEAK CHLOROPLAST MOVEMENT UNDER BLUE LIGHT 1
HORVU.MOREX.r2.6HG0464080	HORVU.MOREX.r2.1HG0051280	0.957835	26S proteasome non-ATPase regulatory subunit-like protein	Argininosuccinate synthase
HORVU.MOREX.r2.4HG0326700	HORVU.MOREX.r2.1HG0051280	0.848572	26S proteasome non-ATPase regulatory subunit 4	Argininosuccinate synthase
HORVU.MOREX.r2.1HG0051410	HORVU.MOREX.r2.1HG0051410	1	Kinase family protein	Kinase family protein
HORVU.MOREX.r2.3HG0232920	HORVU.MOREX.r2.1HG0051860	0.798545	Guanine nucleotide-binding protein beta subunit-like protein	Nucleic acid binding protein
HORVU.MOREX.r2.1HG0069340	HORVU.MOREX.r2.1HG0051860	0.846515	Guanine nucleotide-binding protein subunit beta-1	Nucleic acid binding protein
HORVU.MOREX.r2.1HG0051900	HORVU.MOREX.r2.1HG0051900	1	PISTILLATA-like MADS-box transcription factor	PISTILLATA-like MADS-box transcription factor
HORVU.MOREX.r2.1HG0051960	HORVU.MOREX.r2.1HG0051960	1	NAC domain-containing protein	NAC domain-containing protein
HORVU.MOREX.r2.1HG0052160	HORVU.MOREX.r2.1HG0052160	1	Cytochrome c	Cytochrome c
HORVU.MOREX.r2.4HG0326700	HORVU.MOREX.r2.1HG0052160	0.800057	26S proteasome non-ATPase regulatory subunit 4	Cytochrome c
HORVU.MOREX.r2.1HG0019760	HORVU.MOREX.r2.1HG0052160	0.821773	Dihydrolipoyl dehydrogenase	Cytochrome c
HORVU.MOREX.r2.2HG0103990	HORVU.MOREX.r2.1HG0052390	0.875444	PHD finger alfin-like protein	PHD finger alfin-like protein
HORVU.MOREX.r2.1HG0052390	HORVU.MOREX.r2.1HG0052390	1	PHD finger alfin-like protein	PHD finger alfin-like protein
HORVU.MOREX.r2.1HG0052610	HORVU.MOREX.r2.1HG0052610	1	Calcineurin B-like protein	Calcineurin B-like protein
HORVU.MOREX.r2.1HG0052800	HORVU.MOREX.r2.1HG0052800	1	LOB domain-containing protein 2	LOB domain-containing protein 2
HORVU.MOREX.r2.2HG0143350	HORVU.MOREX.r2.1HG0052860	0.902275	30S ribosomal protein 3, chloroplastic	EG2771
HORVU.MOREX.r2.1HG0052870	HORVU.MOREX.r2.1HG0052870	1	Receptor-like kinase	Receptor-like kinase
HORVU.MOREX.r2.6HG0464080	HORVU.MOREX.r2.1HG0052930	0.777236	26S proteasome non-ATPase regulatory subunit-like protein	Isopentenyl-diphosphate delta-isomerase
HORVU.MOREX.r2.1HG0053180	HORVU.MOREX.r2.1HG0053180	1	Dual specificity phosphatase family protein	Dual specificity phosphatase family protein
HORVU.MOREX.r2.2HG0149270	HORVU.MOREX.r2.2HG0149270	1	Proliferating cell nuclear antigen	Proliferating cell nuclear antigen
HORVU.MOREX.r2.7HG0605700	HORVU.MOREX.r2.6HG0520370	0.882385	DNA polymerase IV	Proliferating cell nuclear antigen
HORVU.MOREX.r2.6HG0520370	HORVU.MOREX.r2.6HG0520370	1	Proliferating cell nuclear antigen	Proliferating cell nuclear antigen
HORVU.MOREX.r2.3HG0240830	HORVU.MOREX.r2.6HG0520370	0.795096	DNA polymerase IV	Proliferating cell nuclear antigen
HORVU.MOREX.r2.1HG0053340	HORVU.MOREX.r2.1HG0053340	1	Potassium channel	Potassium channel
HORVU.MOREX.r2.1HG0041940	HORVU.MOREX.r2.1HG0053600	0.912645	Poly [ADP-ribose] polymerase	NAC domain protein,
HORVU.MOREX.r2.1HG0053600	HORVU.MOREX.r2.1HG0053600	1	NAC domain protein,	NAC domain protein,
HORVU.MOREX.r2.6HG0471020	HORVU.MOREX.r2.1HG0055200	0.944111	Homeobox protein knotted-1, putative	Metacaspase
HORVU.MOREX.r2.4HG0343940	HORVU.MOREX.r2.1HG0055260	0.854335	Alcohol dehydrogenase-like protein	Phosphoglycerate kinase
HORVU.MOREX.r2.1HG0055460	HORVU.MOREX.r2.1HG0055460	1	BZIP transcription factor	BZIP transcription factor
HORVU.MOREX.r2.2HG0133410	HORVU.MOREX.r2.1HG0056070	0.80759	SNF1-related protein kinase regulatory subunit gamma 1	SNF1-related protein kinase regulatory subunit beta-1
HORVU.MOREX.r2.4HG0312690	HORVU.MOREX.r2.1HG0056230	0.961848	Peter Pan-like protein	60S ribosomal protein L30
HORVU.MOREX.r2.7HG0584290	HORVU.MOREX.r2.1HG0056230	0.917416	40S ribosomal protein S13	60S ribosomal protein L30
HORVU.MOREX.r2.5HG0401170	HORVU.MOREX.r2.1HG0056230	0.905889	30S ribosomal protein S12	60S ribosomal protein L30
HORVU.MOREX.r2.1HG0058860	HORVU.MOREX.r2.1HG0056230	0.988608	30S ribosomal protein S12	60S ribosomal protein L30
HORVU.MOREX.r2.1HG0056230	HORVU.MOREX.r2.1HG0056230	1	60S ribosomal protein L30	60S ribosomal protein L30
HORVU.MOREX.r2.3HG0250830	HORVU.MOREX.r2.1HG0056230	0.969847	Ribosomal protein	60S ribosomal protein L30
HORVU.MOREX.r2.4HG0280470	HORVU.MOREX.r2.1HG0056230	0.860633	Zinc finger family protein	60S ribosomal protein L30
HORVU.MOREX.r2.4HG0332760	HORVU.MOREX.r2.1HG0056230	0.928408	RNA cytidine acetyltransferase	60S ribosomal protein L30
HORVU.MOREX.r2.5HG0437010	HORVU.MOREX.r2.1HG0056230	0.9374	30S ribosomal protein S12	60S ribosomal protein L30
HORVU.MOREX.r2.2HG0158350	HORVU.MOREX.r2.1HG0056230	0.989675	30S ribosomal protein S17	60S ribosomal protein L30
HORVU.MOREX.r2.5HG0389360	HORVU.MOREX.r2.1HG0056230	0.989234	50S ribosomal protein L22	60S ribosomal protein L30
HORVU.MOREX.r2.4HG0291480	HORVU.MOREX.r2.1HG0056230	0.986615	Ribosomal protein L3	60S ribosomal protein L30
HORVU.MOREX.r2.4HG0339250	HORVU.MOREX.r2.1HG0056230	0.938824	Ankyrin repeat domain protein, putative	60S ribosomal protein L30
HORVU.MOREX.r2.7HG0572270	HORVU.MOREX.r2.1HG0056230	0.987361	Ribosomal protein	60S ribosomal protein L30
HORVU.MOREX.r2.3HG0253300	HORVU.MOREX.r2.1HG0056230	0.990048	30S ribosomal protein S12	60S ribosomal protein L30
HORVU.MOREX.r2.7HG0588940	HORVU.MOREX.r2.1HG0056230	0.925228	U3 small nucleolar RNA-associated protein 14	60S ribosomal protein L30
HORVU.MOREX.r2.7HG0584220	HORVU.MOREX.r2.1HG0056230	0.992365	40S ribosomal protein S13	60S ribosomal protein L30
HORVU.MOREX.r2.2HG0120460	HORVU.MOREX.r2.1HG0056230	0.982496	Ribosomal protein L15	60S ribosomal protein L30
HORVU.MOREX.r2.2HG0100920	HORVU.MOREX.r2.1HG0056230	0.95993	30S ribosomal protein S4	60S ribosomal protein L30
HORVU.MOREX.r2.6HG0490110	HORVU.MOREX.r2.1HG0056230	0.93982	CCAAT/enhancer-binding protein zeta	60S ribosomal protein L30
HORVU.MOREX.r2.7HG0595620	HORVU.MOREX.r2.1HG0056230	0.99225	40S ribosomal protein S24	60S ribosomal protein L30
HORVU.MOREX.r2.5HG0433840	HORVU.MOREX.r2.1HG0056230	0.991877	60S ribosomal protein L7	60S ribosomal protein L30
HORVU.MOREX.r2.4HG0336330	HORVU.MOREX.r2.1HG0056230	0.963599	60S ribosomal protein L4	60S ribosomal protein L30
HORVU.MOREX.r2.7HG0612250	HORVU.MOREX.r2.1HG0056230	0.954569	rRNA 2'-O-methyltransferase fibrillarin 2	60S ribosomal protein L30
HORVU.MOREX.r2.4HG0314300	HORVU.MOREX.r2.1HG0056230	0.944197	Nucleolar GTP-binding protein 2	60S ribosomal protein L30
HORVU.MOREX.r2.2HG0159710	HORVU.MOREX.r2.1HG0056230	0.990671	60S ribosomal protein L7	60S ribosomal protein L30
HORVU.MOREX.r2.3HG0256170	HORVU.MOREX.r2.1HG0056230	0.960789	Protein serine/threonine kinase	60S ribosomal protein L30
HORVU.MOREX.r2.4HG0343460	HORVU.MOREX.r2.1HG0056230	0.990745	60S ribosomal protein L21	60S ribosomal protein L30
HORVU.MOREX.r2.5HG0431510	HORVU.MOREX.r2.1HG0056230	0.932731	60S ribosomal protein L4	60S ribosomal protein L30
HORVU.MOREX.r2.6HG0499400	HORVU.MOREX.r2.1HG0056230	0.777645	Transmembrane protein-like protein	60S ribosomal protein L30
HORVU.MOREX.r2.1HG0000700	HORVU.MOREX.r2.1HG0056230	0.812912	Transcription initiation factor TFIID subunit 6	60S ribosomal protein L30
HORVU.MOREX.r2.3HG0253280	HORVU.MOREX.r2.1HG0056230	0.840352	zinc finger CCCH domain protein	60S ribosomal protein L30
HORVU.MOREX.r2.1HG0018910	HORVU.MOREX.r2.1HG0056230	0.986192	60S ribosomal protein L18-like protein	60S ribosomal protein L30
HORVU.MOREX.r2.2HG0165560	HORVU.MOREX.r2.1HG0056230	0.954026	Protein SDA1-like protein	60S ribosomal protein L30
HORVU.MOREX.r2.5HG0376740	HORVU.MOREX.r2.1HG0056230	0.987972	Ribosomal protein L3	60S ribosomal protein L30
HORVU.MOREX.r2.7HG0580390	HORVU.MOREX.r2.1HG0056230	0.966862	60S ribosomal protein L34	60S ribosomal protein L30
HORVU.MOREX.r2.3HG0210540	HORVU.MOREX.r2.1HG0056230	0.825469	Syntaxin related protein	60S ribosomal protein L30
HORVU.MOREX.r2.3HG0236190	HORVU.MOREX.r2.1HG0056230	0.867142	KRR1 small subunit processome component	60S ribosomal protein L30
HORVU.MOREX.r2.2HG0094430	HORVU.MOREX.r2.1HG0056230	0.9459	Nucleolar protein	60S ribosomal protein L30
HORVU.MOREX.r2.1HG0078080	HORVU.MOREX.r2.1HG0056230	0.861047	Translation initiation factor if-2, putative	60S ribosomal protein L30
HORVU.MOREX.r2.3HG0202480	HORVU.MOREX.r2.1HG0056230	0.941469	50S ribosomal protein L24	60S ribosomal protein L30
HORVU.MOREX.r2.2HG0102110	HORVU.MOREX.r2.1HG0056230	0.952672	40S ribosomal protein S6	60S ribosomal protein L30
HORVU.MOREX.r2.4HG0295370	HORVU.MOREX.r2.1HG0056230	0.789954	RNA-binding family protein	60S ribosomal protein L30
HORVU.MOREX.r2.7HG0619260	HORVU.MOREX.r2.1HG0056230	0.985365	60S ribosomal protein L27	60S ribosomal protein L30
HORVU.MOREX.r2.1HG0031760	HORVU.MOREX.r2.1HG0056230	0.987717	60S ribosomal protein L21	60S ribosomal protein L30
HORVU.MOREX.r2.2HG0095700	HORVU.MOREX.r2.1HG0056230	0.914184	Ubiquitin carboxyl-terminal hydrolase	60S ribosomal protein L30
HORVU.MOREX.r2.7HG0567650	HORVU.MOREX.r2.1HG0056230	0.973923	50S ribosomal protein L22	60S ribosomal protein L30
HORVU.MOREX.r2.4HG0279970	HORVU.MOREX.r2.1HG0056230	0.84848	Pescadillo homolog	60S ribosomal protein L30
HORVU.MOREX.r2.2HG0086170	HORVU.MOREX.r2.1HG0056230	0.969705	40S ribosomal protein S6	60S ribosomal protein L30
HORVU.MOREX.r2.6HG0523600	HORVU.MOREX.r2.1HG0056230	0.952901	rRNA 2'-O-methyltransferase fibrillarin 2	60S ribosomal protein L30
HORVU.MOREX.r2.5HG0378380	HORVU.MOREX.r2.1HG0056230	0.94141	30S ribosomal protein S4	60S ribosomal protein L30
HORVU.MOREX.r2.6HG0484240	HORVU.MOREX.r2.1HG0056230	0.981383	40S ribosomal protein S24	60S ribosomal protein L30
HORVU.MOREX.r2.2HG0092790	HORVU.MOREX.r2.1HG0056230	0.988157	60S ribosomal protein L18	60S ribosomal protein L30
HORVU.MOREX.r2.5HG0376250	HORVU.MOREX.r2.1HG0056230	0.87755	Nucleolar protein 6	60S ribosomal protein L30
HORVU.MOREX.r2.2HG0129270	HORVU.MOREX.r2.1HG0056230	0.984994	50S ribosomal protein L13	60S ribosomal protein L30
HORVU.MOREX.r2.6HG0488990	HORVU.MOREX.r2.1HG0056230	0.995402	60S ribosomal protein L6	60S ribosomal protein L30
HORVU.MOREX.r2.5HG0408510	HORVU.MOREX.r2.1HG0056230	0.975114	60S ribosomal protein L32	60S ribosomal protein L30
HORVU.MOREX.r2.2HG0090790	HORVU.MOREX.r2.1HG0056230	0.962148	Guanine nucleotide-binding-like protein	60S ribosomal protein L30
HORVU.MOREX.r2.6HG0492210	HORVU.MOREX.r2.1HG0056230	0.926695	30S ribosomal protein S17	60S ribosomal protein L30
HORVU.MOREX.r2.6HG0481770	HORVU.MOREX.r2.1HG0056230	0.802379	50S ribosomal protein L21	60S ribosomal protein L30
HORVU.MOREX.r2.5HG0397940	HORVU.MOREX.r2.1HG0056230	0.956712	Ribosome production factor 2-like protein	60S ribosomal protein L30
HORVU.MOREX.r2.1HG0047060	HORVU.MOREX.r2.1HG0056240	0.815362	DNA-directed RNA polymerase	Protein KRI1
HORVU.MOREX.r2.1HG0069590	HORVU.MOREX.r2.1HG0056240	0.791517	Nucleolar family protein	Protein KRI1
HORVU.MOREX.r2.7HG0588940	HORVU.MOREX.r2.1HG0056240	0.945435	U3 small nucleolar RNA-associated protein 14	Protein KRI1
HORVU.MOREX.r2.5HG0363580	HORVU.MOREX.r2.1HG0056240	0.92491	rRNA-processing protein UTP23 like	Protein KRI1
HORVU.MOREX.r2.7HG0591270	HORVU.MOREX.r2.1HG0056240	0.844881	Pre-rRNA-processing protein TSR1-like protein	Protein KRI1
HORVU.MOREX.r2.4HG0283890	HORVU.MOREX.r2.1HG0056240	0.945332	Transducin/WD-like repeat-protein	Protein KRI1
HORVU.MOREX.r2.6HG0490110	HORVU.MOREX.r2.1HG0056240	0.868425	CCAAT/enhancer-binding protein zeta	Protein KRI1
HORVU.MOREX.r2.2HG0094430	HORVU.MOREX.r2.1HG0056240	0.860533	Nucleolar protein	Protein KRI1
HORVU.MOREX.r2.1HG0047820	HORVU.MOREX.r2.1HG0056280	0.83348	Histone H2B	Histone H3
HORVU.MOREX.r2.1HG0064590	HORVU.MOREX.r2.1HG0056280	0.804568	Histone H2B	Histone H3
HORVU.MOREX.r2.7HG0613370	HORVU.MOREX.r2.1HG0056280	0.877596	Histone H2B	Histone H3
HORVU.MOREX.r2.1HG0047880	HORVU.MOREX.r2.1HG0056280	0.830004	Histone H2B	Histone H3
HORVU.MOREX.r2.3HG0191650	HORVU.MOREX.r2.1HG0056280	0.912215	Histone H2B	Histone H3
HORVU.MOREX.r2.1HG0064560	HORVU.MOREX.r2.1HG0056300	0.766691	Histone H2B	Histone H3
HORVU.MOREX.r2.7HG0569380	HORVU.MOREX.r2.1HG0056380	0.782088	Ankyrin repeat domain containing protein	NADH-cytochrome b5 reductase
HORVU.MOREX.r2.1HG0056410	HORVU.MOREX.r2.1HG0056410	1	Myb family transcription factor APL	Myb family transcription factor APL
HORVU.MOREX.r2.7HG0530900	HORVU.MOREX.r2.1HG0056600	0.885028	Dolichyl-diphosphooligosaccharide--protein glycosyltransferase subunit DAD1	Keratinocyte-associated protein 2
HORVU.MOREX.r2.2HG0126960	HORVU.MOREX.r2.1HG0056620	0.79175	Receptor kinase	Protein kinase-like protein
HORVU.MOREX.r2.5HG0426900	HORVU.MOREX.r2.1HG0056620	0.771505	Receptor protein kinase-like protein	Protein kinase-like protein
HORVU.MOREX.r2.4HG0336030	HORVU.MOREX.r2.1HG0056760	0.832184	Kelch repeat-containing protein	Transducin/WD40 repeat protein
HORVU.MOREX.r2.1HG0045430	HORVU.MOREX.r2.1HG0057520	0.861404	Calcineurin B-like protein	Non-specific serine/threonine protein kinase
HORVU.MOREX.r2.1HG0057520	HORVU.MOREX.r2.1HG0057520	1	Non-specific serine/threonine protein kinase	Non-specific serine/threonine protein kinase
HORVU.MOREX.r2.4HG0311100	HORVU.MOREX.r2.1HG0057620	0.779219	14-3-3 protein	Aminotransferase like protein
HORVU.MOREX.r2.6HG0469000	HORVU.MOREX.r2.1HG0057640	0.862014	Polyubiquitin	TOM1-like protein 2
HORVU.MOREX.r2.1HG0057800	HORVU.MOREX.r2.1HG0057800	1	PRA1 family protein	PRA1 family protein
HORVU.MOREX.r2.2HG0126960	HORVU.MOREX.r2.1HG0057800	0.807708	Receptor kinase	PRA1 family protein
HORVU.MOREX.r2.4HG0278090	HORVU.MOREX.r2.1HG0057800	0.836668	Pleckstrin-like (PH) domain protein	PRA1 family protein
HORVU.MOREX.r2.3HG0250080	HORVU.MOREX.r2.1HG0057810	0.80684	U-box domain-containing family protein	Exocyst complex component, putative
HORVU.MOREX.r2.5HG0378740	HORVU.MOREX.r2.1HG0057810	0.780748	Plant/F1M20-13 protein	Exocyst complex component, putative
HORVU.MOREX.r2.4HG0291600	HORVU.MOREX.r2.1HG0057810	0.823874	Plant/F1M20-13 protein	Exocyst complex component, putative
HORVU.MOREX.r2.4HG0281710	HORVU.MOREX.r2.1HG0058060	0.844673	Histidine kinase	Sorting and assembly machinery component 50 like
HORVU.MOREX.r2.1HG0069340	HORVU.MOREX.r2.1HG0058060	0.889915	Guanine nucleotide-binding protein subunit beta-1	Sorting and assembly machinery component 50 like
HORVU.MOREX.r2.3HG0232920	HORVU.MOREX.r2.1HG0058060	0.791498	Guanine nucleotide-binding protein beta subunit-like protein	Sorting and assembly machinery component 50 like
HORVU.MOREX.r2.1HG0058450	HORVU.MOREX.r2.1HG0058450	1	Kinase family protein	Kinase family protein
HORVU.MOREX.r2.7HG0610970	HORVU.MOREX.r2.1HG0058610	0.766945	SAUR-like auxin-responsive protein family	Kinase interacting (KIP1-like) family protein
HORVU.MOREX.r2.1HG0059030	HORVU.MOREX.r2.1HG0059030	1	SAC3/GANP/Nin1/mts3/eIF-3 p25 family protein	SAC3/GANP/Nin1/mts3/eIF-3 p25 family protein
HORVU.MOREX.r2.5HG0431510	HORVU.MOREX.r2.1HG0059160	0.927427	60S ribosomal protein L4	30S ribosomal protein S8, putative
HORVU.MOREX.r2.3HG0206600	HORVU.MOREX.r2.1HG0059160	0.953018	Eukaryotic translation initiation factor 3 subunit L	30S ribosomal protein S8, putative
HORVU.MOREX.r2.7HG0572270	HORVU.MOREX.r2.1HG0059160	0.987318	Ribosomal protein	30S ribosomal protein S8, putative
HORVU.MOREX.r2.3HG0182650	HORVU.MOREX.r2.1HG0059160	0.985237	50S ribosomal protein L6	30S ribosomal protein S8, putative
HORVU.MOREX.r2.1HG0018040	HORVU.MOREX.r2.1HG0059160	0.984241	40S ribosomal protein S4	30S ribosomal protein S8, putative
HORVU.MOREX.r2.1HG0026750	HORVU.MOREX.r2.1HG0059160	0.953347	40S ribosomal protein S3a	30S ribosomal protein S8, putative
HORVU.MOREX.r2.3HG0192970	HORVU.MOREX.r2.1HG0059160	0.968656	30S ribosomal protein S7	30S ribosomal protein S8, putative
HORVU.MOREX.r2.5HG0430630	HORVU.MOREX.r2.1HG0059160	0.963002	30S ribosomal protein S13	30S ribosomal protein S8, putative
HORVU.MOREX.r2.5HG0437010	HORVU.MOREX.r2.1HG0059160	0.940156	30S ribosomal protein S12	30S ribosomal protein S8, putative
HORVU.MOREX.r2.7HG0528960	HORVU.MOREX.r2.1HG0059160	0.964333	50S ribosomal protein L6	30S ribosomal protein S8, putative
HORVU.MOREX.r2.3HG0182620	HORVU.MOREX.r2.1HG0059160	0.969111	50S ribosomal protein L6	30S ribosomal protein S8, putative
HORVU.MOREX.r2.7HG0577600	HORVU.MOREX.r2.1HG0059160	0.989876	60S ribosomal protein L13	30S ribosomal protein S8, putative
HORVU.MOREX.r2.6HG0454200	HORVU.MOREX.r2.1HG0059160	0.983698	60S ribosomal protein L13	30S ribosomal protein S8, putative
HORVU.MOREX.r2.1HG0058860	HORVU.MOREX.r2.1HG0059160	0.976042	30S ribosomal protein S12	30S ribosomal protein S8, putative
HORVU.MOREX.r2.3HG0253300	HORVU.MOREX.r2.1HG0059160	0.981491	30S ribosomal protein S12	30S ribosomal protein S8, putative
HORVU.MOREX.r2.6HG0488990	HORVU.MOREX.r2.1HG0059160	0.981181	60S ribosomal protein L6	30S ribosomal protein S8, putative
HORVU.MOREX.r2.2HG0137270	HORVU.MOREX.r2.1HG0059160	0.963753	30S ribosomal protein S11	30S ribosomal protein S8, putative
HORVU.MOREX.r2.7HG0577670	HORVU.MOREX.r2.1HG0059160	0.933486	30S ribosomal protein S3	30S ribosomal protein S8, putative
HORVU.MOREX.r2.6HG0481770	HORVU.MOREX.r2.1HG0059160	0.810885	50S ribosomal protein L21	30S ribosomal protein S8, putative
HORVU.MOREX.r2.4HG0281710	HORVU.MOREX.r2.1HG0059160	0.765309	Histidine kinase	30S ribosomal protein S8, putative
HORVU.MOREX.r2.7HG0584290	HORVU.MOREX.r2.1HG0059160	0.89242	40S ribosomal protein S13	30S ribosomal protein S8, putative
HORVU.MOREX.r2.2HG0158350	HORVU.MOREX.r2.1HG0059160	0.974716	30S ribosomal protein S17	30S ribosomal protein S8, putative
HORVU.MOREX.r2.6HG0492210	HORVU.MOREX.r2.1HG0059160	0.948828	30S ribosomal protein S17	30S ribosomal protein S8, putative
HORVU.MOREX.r2.7HG0608850	HORVU.MOREX.r2.1HG0059160	0.974147	30S ribosomal protein S11	30S ribosomal protein S8, putative
HORVU.MOREX.r2.1HG0031760	HORVU.MOREX.r2.1HG0059160	0.97248	60S ribosomal protein L21	30S ribosomal protein S8, putative
HORVU.MOREX.r2.1HG0018910	HORVU.MOREX.r2.1HG0059160	0.965972	60S ribosomal protein L18-like protein	30S ribosomal protein S8, putative
HORVU.MOREX.r2.1HG0020680	HORVU.MOREX.r2.1HG0059160	0.795668	Ribosomal protein	30S ribosomal protein S8, putative
HORVU.MOREX.r2.5HG0401170	HORVU.MOREX.r2.1HG0059160	0.885381	30S ribosomal protein S12	30S ribosomal protein S8, putative
HORVU.MOREX.r2.2HG0102110	HORVU.MOREX.r2.1HG0059160	0.940389	40S ribosomal protein S6	30S ribosomal protein S8, putative
HORVU.MOREX.r2.3HG0250830	HORVU.MOREX.r2.1HG0059160	0.973599	Ribosomal protein	30S ribosomal protein S8, putative
HORVU.MOREX.r2.2HG0086170	HORVU.MOREX.r2.1HG0059160	0.973321	40S ribosomal protein S6	30S ribosomal protein S8, putative
HORVU.MOREX.r2.2HG0092790	HORVU.MOREX.r2.1HG0059160	0.975459	60S ribosomal protein L18	30S ribosomal protein S8, putative
HORVU.MOREX.r2.4HG0314500	HORVU.MOREX.r2.1HG0059160	0.951715	Ribosomal protein L19	30S ribosomal protein S8, putative
HORVU.MOREX.r2.2HG0092650	HORVU.MOREX.r2.1HG0059160	0.955365	Ribosomal protein L19	30S ribosomal protein S8, putative
HORVU.MOREX.r2.3HG0201870	HORVU.MOREX.r2.1HG0059160	0.969116	50S ribosomal protein L5	30S ribosomal protein S8, putative
HORVU.MOREX.r2.5HG0426690	HORVU.MOREX.r2.1HG0059160	0.814971	Eukaryotic translation initiation factor 3 subunit C	30S ribosomal protein S8, putative
HORVU.MOREX.r2.4HG0331970	HORVU.MOREX.r2.1HG0059160	0.981552	40S ribosomal protein S3a	30S ribosomal protein S8, putative
HORVU.MOREX.r2.5HG0399730	HORVU.MOREX.r2.1HG0059160	0.938753	Eukaryotic translation initiation factor 3 subunit C	30S ribosomal protein S8, putative
HORVU.MOREX.r2.2HG0103970	HORVU.MOREX.r2.1HG0059160	0.80475	30S ribosomal protein S3	30S ribosomal protein S8, putative
HORVU.MOREX.r2.7HG0567650	HORVU.MOREX.r2.1HG0059160	0.96411	50S ribosomal protein L22	30S ribosomal protein S8, putative
HORVU.MOREX.r2.5HG0389330	HORVU.MOREX.r2.1HG0059160	0.976247	40S ribosomal protein S19	30S ribosomal protein S8, putative
HORVU.MOREX.r2.5HG0409860	HORVU.MOREX.r2.1HG0059160	0.98139	60S ribosomal protein L7a	30S ribosomal protein S8, putative
HORVU.MOREX.r2.4HG0291480	HORVU.MOREX.r2.1HG0059160	0.985568	Ribosomal protein L3	30S ribosomal protein S8, putative
HORVU.MOREX.r2.5HG0378380	HORVU.MOREX.r2.1HG0059160	0.930074	30S ribosomal protein S4	30S ribosomal protein S8, putative
HORVU.MOREX.r2.7HG0584220	HORVU.MOREX.r2.1HG0059160	0.975358	40S ribosomal protein S13	30S ribosomal protein S8, putative
HORVU.MOREX.r2.7HG0568170	HORVU.MOREX.r2.1HG0059160	0.987561	60S ribosomal protein L7a	30S ribosomal protein S8, putative
HORVU.MOREX.r2.2HG0100920	HORVU.MOREX.r2.1HG0059160	0.968263	30S ribosomal protein S4	30S ribosomal protein S8, putative
HORVU.MOREX.r2.4HG0336330	HORVU.MOREX.r2.1HG0059160	0.956649	60S ribosomal protein L4	30S ribosomal protein S8, putative
HORVU.MOREX.r2.5HG0376740	HORVU.MOREX.r2.1HG0059160	0.985699	Ribosomal protein L3	30S ribosomal protein S8, putative
HORVU.MOREX.r2.2HG0159710	HORVU.MOREX.r2.1HG0059160	0.9842	60S ribosomal protein L7	30S ribosomal protein S8, putative
HORVU.MOREX.r2.3HG0202480	HORVU.MOREX.r2.1HG0059160	0.90359	50S ribosomal protein L24	30S ribosomal protein S8, putative
HORVU.MOREX.r2.5HG0389360	HORVU.MOREX.r2.1HG0059160	0.984756	50S ribosomal protein L22	30S ribosomal protein S8, putative
HORVU.MOREX.r2.2HG0120460	HORVU.MOREX.r2.1HG0059160	0.974776	Ribosomal protein L15	30S ribosomal protein S8, putative
HORVU.MOREX.r2.5HG0433840	HORVU.MOREX.r2.1HG0059160	0.989298	60S ribosomal protein L7	30S ribosomal protein S8, putative
HORVU.MOREX.r2.4HG0343460	HORVU.MOREX.r2.1HG0059160	0.971369	60S ribosomal protein L21	30S ribosomal protein S8, putative
HORVU.MOREX.r2.1HG0024100	HORVU.MOREX.r2.1HG0059160	0.988578	50S ribosomal protein L5	30S ribosomal protein S8, putative
HORVU.MOREX.r2.4HG0295780	HORVU.MOREX.r2.1HG0059170	0.938323	PRA1 family protein	Ras-related protein-like protein
HORVU.MOREX.r2.3HG0212660	HORVU.MOREX.r2.1HG0059170	0.877473	Guanosine nucleotide diphosphate dissociation inhibitor	Ras-related protein-like protein
HORVU.MOREX.r2.1HG0057800	HORVU.MOREX.r2.1HG0059170	0.913446	PRA1 family protein	Ras-related protein-like protein
HORVU.MOREX.r2.5HG0385110	HORVU.MOREX.r2.1HG0059170	0.875737	PRA1 family protein	Ras-related protein-like protein
HORVU.MOREX.r2.1HG0059260	HORVU.MOREX.r2.1HG0059260	1	GTP cyclohydrolase II/3,4-dihydroxy-2-butanone 4-phosphate synthase	GTP cyclohydrolase II/3,4-dihydroxy-2-butanone 4-phosphate synthase
HORVU.MOREX.r2.1HG0059320	HORVU.MOREX.r2.1HG0059320	1	Tryptophan aminotransferase	Tryptophan aminotransferase
HORVU.MOREX.r2.1HG0059460	HORVU.MOREX.r2.1HG0059460	1	ATP-dependent zinc metalloprotease FtsH	ATP-dependent zinc metalloprotease FtsH
HORVU.MOREX.r2.2HG0134730	HORVU.MOREX.r2.1HG0059720	0.844671	Bifunctional uridylyltransferase/uridylyl-removing enzyme	Uracil phosphoribosyltransferase
HORVU.MOREX.r2.3HG0271220	HORVU.MOREX.r2.1HG0059720	0.904911	Thioredoxin-like protein	Uracil phosphoribosyltransferase
HORVU.MOREX.r2.7HG0541250	HORVU.MOREX.r2.1HG0059720	0.948276	Photosynthetic NDH subcomplex B 3	Uracil phosphoribosyltransferase
HORVU.MOREX.r2.1HG0059750	HORVU.MOREX.r2.1HG0059750	1	Gamma-glutamyl phosphate reductase	Gamma-glutamyl phosphate reductase
HORVU.MOREX.r2.2HG0138840	HORVU.MOREX.r2.1HG0059900	0.938141	Nicotinate phosphoribosyltransferase	Phosphatidylinositol:ceramide inositolphosphotransferase
HORVU.MOREX.r2.6HG0469000	HORVU.MOREX.r2.1HG0060090	0.802189	Polyubiquitin	HXXXD-type acyl-transferase family protein
HORVU.MOREX.r2.2HG0140390	HORVU.MOREX.r2.1HG0060280	0.894773	Coiled-coil domain-containing protein	Protein BUD31
HORVU.MOREX.r2.1HG0060280	HORVU.MOREX.r2.1HG0060280	1	Protein BUD31	Protein BUD31
HORVU.MOREX.r2.1HG0060440	HORVU.MOREX.r2.1HG0060440	1	Cell division protein ftsZ	Cell division protein ftsZ
HORVU.MOREX.r2.1HG0060650	HORVU.MOREX.r2.1HG0060650	1	Kinase	Kinase
HORVU.MOREX.r2.2HG0171360	HORVU.MOREX.r2.1HG0060710	0.788565	Protein vip1	NC domain-containing protein
HORVU.MOREX.r2.1HG0060860	HORVU.MOREX.r2.1HG0060860	1	Fructose-1,6-bisphosphatase class 1	Fructose-1,6-bisphosphatase class 1
HORVU.MOREX.r2.1HG0060840	HORVU.MOREX.r2.1HG0060840	1	Actin	Actin
HORVU.MOREX.r2.1HG0061590	HORVU.MOREX.r2.1HG0061590	1	Soluble inorganic pyrophosphatase	Soluble inorganic pyrophosphatase
HORVU.MOREX.r2.1HG0062120	HORVU.MOREX.r2.1HG0061590	0.895448	Inorganic pyrophosphatase family protein	Soluble inorganic pyrophosphatase
HORVU.MOREX.r2.6HG0469000	HORVU.MOREX.r2.1HG0061590	0.825315	Polyubiquitin	Soluble inorganic pyrophosphatase
HORVU.MOREX.r2.6HG0465890	HORVU.MOREX.r2.1HG0061820	0.821123	DNA-directed RNA polymerase subunit	Transcription elongation factor Spt5-like protein, putative
HORVU.MOREX.r2.5HG0367380	HORVU.MOREX.r2.1HG0062050	0.7644	Pentatricopeptide repeat-containing protein, putative	Mitochondrial-processing peptidase subunit alpha
HORVU.MOREX.r2.1HG0062120	HORVU.MOREX.r2.1HG0062120	1	Inorganic pyrophosphatase family protein	Inorganic pyrophosphatase family protein
HORVU.MOREX.r2.5HG0413090	HORVU.MOREX.r2.1HG0062380	0.801656	Rhomboid-like protein	Nuclear pore complex protein NUP35
HORVU.MOREX.r2.6HG0516470	HORVU.MOREX.r2.5HG0363530	0.908731	Eukaryotic translation initiation factor 3 subunit G	Elongation factor Tu
HORVU.MOREX.r2.1HG0047060	HORVU.MOREX.r2.5HG0363530	0.943846	DNA-directed RNA polymerase	Elongation factor Tu
HORVU.MOREX.r2.2HG0089200	HORVU.MOREX.r2.5HG0363530	0.974227	Eukaryotic translation initiation factor 2 subunit alpha	Elongation factor Tu
HORVU.MOREX.r2.3HG0225410	HORVU.MOREX.r2.5HG0363530	0.826516	N-alpha-acetyltransferase 16, NatA auxiliary subunit	Elongation factor Tu
HORVU.MOREX.r2.4HG0319410	HORVU.MOREX.r2.5HG0363530	0.837156	Eukaryotic translation initiation factor 2 subunit alpha	Elongation factor Tu
HORVU.MOREX.r2.5HG0363530	HORVU.MOREX.r2.5HG0363530	1	Elongation factor Tu	Elongation factor Tu
HORVU.MOREX.r2.2HG0095700	HORVU.MOREX.r2.5HG0363530	0.916986	Ubiquitin carboxyl-terminal hydrolase	Elongation factor Tu
HORVU.MOREX.r2.1HG0003480	HORVU.MOREX.r2.5HG0363530	0.896704	Pumilio-like protein	Elongation factor Tu
HORVU.MOREX.r2.2HG0129270	HORVU.MOREX.r2.5HG0363530	0.957399	50S ribosomal protein L13	Elongation factor Tu
HORVU.MOREX.r2.7HG0580900	HORVU.MOREX.r2.5HG0363530	0.877481	Small nuclear ribonucleoprotein family protein	Elongation factor Tu
HORVU.MOREX.r2.3HG0210540	HORVU.MOREX.r2.5HG0363530	0.794221	Syntaxin related protein	Elongation factor Tu
HORVU.MOREX.r2.1HG0028810	HORVU.MOREX.r2.5HG0363530	0.913956	Methylthioribose-1-phosphate isomerase	Elongation factor Tu
HORVU.MOREX.r2.4HG0315180	HORVU.MOREX.r2.5HG0363530	0.942046	Eukaryotic translation initiation factor 2 beta subunit, putative, expressed	Elongation factor Tu
HORVU.MOREX.r2.3HG0236190	HORVU.MOREX.r2.5HG0363530	0.893151	KRR1 small subunit processome component	Elongation factor Tu
HORVU.MOREX.r2.5HG0399730	HORVU.MOREX.r2.5HG0363530	0.956047	Eukaryotic translation initiation factor 3 subunit C	Elongation factor Tu
HORVU.MOREX.r2.5HG0422000	HORVU.MOREX.r2.5HG0363530	0.841384	Translation initiation factor eIF-2B delta subunit, putative, expressed	Elongation factor Tu
HORVU.MOREX.r2.3HG0253280	HORVU.MOREX.r2.5HG0363530	0.85793	zinc finger CCCH domain protein	Elongation factor Tu
HORVU.MOREX.r2.1HG0046370	HORVU.MOREX.r2.5HG0363530	0.878675	Small nuclear ribonucleoprotein family protein	Elongation factor Tu
HORVU.MOREX.r2.5HG0425890	HORVU.MOREX.r2.5HG0363530	0.928794	Protein kinase	Elongation factor Tu
HORVU.MOREX.r2.4HG0286500	HORVU.MOREX.r2.5HG0363530	0.822923	Eukaryotic translation initiation factor 3 subunit B	Elongation factor Tu
HORVU.MOREX.r2.1HG0062930	HORVU.MOREX.r2.1HG0062930	1	Auxin response factor	Auxin response factor
HORVU.MOREX.r2.1HG0063830	HORVU.MOREX.r2.1HG0063830	1	Ubiquitin carboxyl-terminal hydrolase	Ubiquitin carboxyl-terminal hydrolase
HORVU.MOREX.r2.2HG0097010	HORVU.MOREX.r2.1HG0063880	0.927033	BTB-POZ and MATH domain protein	Ethylene-responsive transcription factor
HORVU.MOREX.r2.5HG0377070	HORVU.MOREX.r2.1HG0063880	0.82863	SWI/SNF complex subunit SWI3C	Ethylene-responsive transcription factor
HORVU.MOREX.r2.3HG0271790	HORVU.MOREX.r2.1HG0063980	0.834739	General transcription factor IIE subunit 1	Transcription initiation factor IIF subunit beta
HORVU.MOREX.r2.2HG0155200	HORVU.MOREX.r2.1HG0064440	0.764494	Replication factor C subunit	Glutamate--tRNA ligase
HORVU.MOREX.r2.2HG0095700	HORVU.MOREX.r2.1HG0064440	0.807803	Ubiquitin carboxyl-terminal hydrolase	Glutamate--tRNA ligase
HORVU.MOREX.r2.6HG0469000	HORVU.MOREX.r2.1HG0064440	0.783533	Polyubiquitin	Glutamate--tRNA ligase
HORVU.MOREX.r2.7HG0544700	HORVU.MOREX.r2.1HG0064440	0.839992	Adenylyltransferase and sulfurtransferase MOCS3	Glutamate--tRNA ligase
HORVU.MOREX.r2.1HG0069340	HORVU.MOREX.r2.1HG0064430	0.771258	Guanine nucleotide-binding protein subunit beta-1	Chlorophyll a-b binding protein, chloroplastic
HORVU.MOREX.r2.5HG0365730	HORVU.MOREX.r2.1HG0064430	0.773498	Nuclear pore complex protein NUP93A	Chlorophyll a-b binding protein, chloroplastic
HORVU.MOREX.r2.3HG0232920	HORVU.MOREX.r2.1HG0064430	0.784188	Guanine nucleotide-binding protein beta subunit-like protein	Chlorophyll a-b binding protein, chloroplastic
HORVU.MOREX.r2.6HG0521660	HORVU.MOREX.r2.1HG0064590	0.78019	Transcriptional corepressor LEUNIG	Histone H2B
HORVU.MOREX.r2.6HG0521380	HORVU.MOREX.r2.1HG0064910	0.851846	U-box domain-containing family protein	Sec14p-like phosphatidylinositol transfer family protein
HORVU.MOREX.r2.6HG0521570	HORVU.MOREX.r2.1HG0064910	0.792456	U-box domain-containing family protein	Sec14p-like phosphatidylinositol transfer family protein
HORVU.MOREX.r2.2HG0137960	HORVU.MOREX.r2.1HG0064910	0.850804	U-box domain-containing family protein	Sec14p-like phosphatidylinositol transfer family protein
HORVU.MOREX.r2.6HG0469000	HORVU.MOREX.r2.1HG0064910	0.829327	Polyubiquitin	Sec14p-like phosphatidylinositol transfer family protein
HORVU.MOREX.r2.4HG0312080	HORVU.MOREX.r2.1HG0065080	0.942537	Beta-adaptin-like protein	AP-1 complex subunit mu-1
HORVU.MOREX.r2.4HG0347860	HORVU.MOREX.r2.1HG0065080	0.928183	AP-2 complex subunit alpha-2	AP-1 complex subunit mu-1
HORVU.MOREX.r2.6HG0501850	HORVU.MOREX.r2.1HG0065080	0.938287	AP-2 complex subunit mu	AP-1 complex subunit mu-1
HORVU.MOREX.r2.6HG0520300	HORVU.MOREX.r2.1HG0065080	0.920322	AP-1 complex subunit gamma-2	AP-1 complex subunit mu-1
HORVU.MOREX.r2.5HG0374410	HORVU.MOREX.r2.1HG0065080	0.915853	AP-2 complex subunit sigma	AP-1 complex subunit mu-1
HORVU.MOREX.r2.5HG0428870	HORVU.MOREX.r2.1HG0065080	0.969377	AP-1 complex subunit sigma-1	AP-1 complex subunit mu-1
HORVU.MOREX.r2.7HG0544420	HORVU.MOREX.r2.1HG0065080	0.906184	AP-1 complex subunit gamma-2	AP-1 complex subunit mu-1
HORVU.MOREX.r2.1HG0069340	HORVU.MOREX.r2.1HG0065490	0.947336	Guanine nucleotide-binding protein subunit beta-1	60S ribosomal protein l28
HORVU.MOREX.r2.3HG0232920	HORVU.MOREX.r2.1HG0065490	0.962713	Guanine nucleotide-binding protein beta subunit-like protein	60S ribosomal protein l28
HORVU.MOREX.r2.1HG0065550	HORVU.MOREX.r2.1HG0065550	1	Vesicle transport V-SNARE protein	Vesicle transport V-SNARE protein
HORVU.MOREX.r2.6HG0455470	HORVU.MOREX.r2.1HG0065550	0.837558	Syntaxin, putative	Vesicle transport V-SNARE protein
HORVU.MOREX.r2.1HG0003500	HORVU.MOREX.r2.1HG0065630	0.790131	ERD (Early-responsive to dehydration stress) family protein	IQ domain-containing protein
HORVU.MOREX.r2.1HG0020650	HORVU.MOREX.r2.1HG0065630	0.768532	Thioredoxin-like protein	IQ domain-containing protein
HORVU.MOREX.r2.3HG0227930	HORVU.MOREX.r2.1HG0065630	0.872845	Isoprenylcysteine alpha-carbonyl methylesterase ICME	IQ domain-containing protein
HORVU.MOREX.r2.6HG0516700	HORVU.MOREX.r2.1HG0065630	0.913192	Protein DETOXIFICATION	IQ domain-containing protein
HORVU.MOREX.r2.5HG0399570	HORVU.MOREX.r2.1HG0065630	0.893368	Early light-induced protein	IQ domain-containing protein
HORVU.MOREX.r2.3HG0200760	HORVU.MOREX.r2.1HG0065630	0.782903	Triose phosphate/phosphate translocator, chloroplastic	IQ domain-containing protein
HORVU.MOREX.r2.5HG0399500	HORVU.MOREX.r2.1HG0065630	0.88009	Early light-induced protein	IQ domain-containing protein
HORVU.MOREX.r2.1HG0003480	HORVU.MOREX.r2.1HG0065910	0.909382	Pumilio-like protein	Flap endonuclease 1
HORVU.MOREX.r2.1HG0020280	HORVU.MOREX.r2.1HG0065910	0.862671	Arginine--tRNA ligase	Flap endonuclease 1
HORVU.MOREX.r2.1HG0047060	HORVU.MOREX.r2.1HG0065890	0.953081	DNA-directed RNA polymerase	60 kDa chaperonin
HORVU.MOREX.r2.1HG0031510	HORVU.MOREX.r2.1HG0065890	0.945645	60 kDa chaperonin	60 kDa chaperonin
HORVU.MOREX.r2.1HG0065860	HORVU.MOREX.r2.1HG0065860	1	SWR1-complex protein 4/DNA methyltransferase 1-associated protein 1	SWR1-complex protein 4/DNA methyltransferase 1-associated protein 1
HORVU.MOREX.r2.4HG0313220	HORVU.MOREX.r2.1HG0066030	0.772451	Ubiquitin-like-specific protease ESD4	Nucleosome assembly protein 1-like 1
HORVU.MOREX.r2.5HG0409860	HORVU.MOREX.r2.1HG0066030	0.927338	60S ribosomal protein L7a	Nucleosome assembly protein 1-like 1
HORVU.MOREX.r2.6HG0488480	HORVU.MOREX.r2.1HG0066030	0.823667	Nucleosome assembly protein 1-like 1	Nucleosome assembly protein 1-like 1
HORVU.MOREX.r2.7HG0568170	HORVU.MOREX.r2.1HG0066030	0.949341	60S ribosomal protein L7a	Nucleosome assembly protein 1-like 1
HORVU.MOREX.r2.1HG0066030	HORVU.MOREX.r2.1HG0066030	1	Nucleosome assembly protein 1-like 1	Nucleosome assembly protein 1-like 1
HORVU.MOREX.r2.1HG0003480	HORVU.MOREX.r2.1HG0066050	0.924639	Pumilio-like protein	Phosphoribosylformylglycinamidine synthase family protein
HORVU.MOREX.r2.2HG0170020	HORVU.MOREX.r2.1HG0066050	0.765165	4-hydroxy-tetrahydrodipicolinate synthase	Phosphoribosylformylglycinamidine synthase family protein
HORVU.MOREX.r2.1HG0066220	HORVU.MOREX.r2.1HG0066220	1	Myosin	Myosin
HORVU.MOREX.r2.6HG0510460	HORVU.MOREX.r2.1HG0066210	0.911418	Rac-like GTP-binding protein	Protein phosphatase 2C
HORVU.MOREX.r2.7HG0601460	HORVU.MOREX.r2.1HG0066210	0.862753	Protein FAM63A	Protein phosphatase 2C
HORVU.MOREX.r2.3HG0254340	HORVU.MOREX.r2.1HG0066370	0.963442	Fructose-bisphosphate aldolase	Mitochondrial outer membrane porin
HORVU.MOREX.r2.3HG0254350	HORVU.MOREX.r2.1HG0066370	0.832289	Fructose-bisphosphate aldolase	Mitochondrial outer membrane porin
HORVU.MOREX.r2.6HG0490690	HORVU.MOREX.r2.1HG0066370	0.951978	Glyceraldehyde-3-phosphate dehydrogenase	Mitochondrial outer membrane porin
HORVU.MOREX.r2.1HG0066450	HORVU.MOREX.r2.1HG0066450	1	6-phosphogluconate dehydrogenase, decarboxylating	6-phosphogluconate dehydrogenase, decarboxylating
HORVU.MOREX.r2.5HG0419700	HORVU.MOREX.r2.1HG0066450	0.779586	Ribosome biogenesis protein BOP1 homolog	6-phosphogluconate dehydrogenase, decarboxylating
HORVU.MOREX.r2.1HG0047060	HORVU.MOREX.r2.1HG0066450	0.77728	DNA-directed RNA polymerase	6-phosphogluconate dehydrogenase, decarboxylating
HORVU.MOREX.r2.6HG0501530	HORVU.MOREX.r2.1HG0066450	0.838152	UPF0160 protein MYG1, mitochondrial	6-phosphogluconate dehydrogenase, decarboxylating
HORVU.MOREX.r2.3HG0253280	HORVU.MOREX.r2.1HG0066450	0.790472	zinc finger CCCH domain protein	6-phosphogluconate dehydrogenase, decarboxylating
HORVU.MOREX.r2.1HG0055660	HORVU.MOREX.r2.1HG0066640	0.773874	Nucleotide-sugar transporter family protein	Cytochrome P450 family protein, expressed
HORVU.MOREX.r2.1HG0066720	HORVU.MOREX.r2.1HG0066720	1	CASC3/barentsz eIF4AIII-binding protein	CASC3/barentsz eIF4AIII-binding protein
HORVU.MOREX.r2.1HG0066740	HORVU.MOREX.r2.1HG0066740	1	Calcineurin B-like protein	Calcineurin B-like protein
HORVU.MOREX.r2.3HG0232920	HORVU.MOREX.r2.1HG0066930	0.937306	Guanine nucleotide-binding protein beta subunit-like protein	RNA binding protein
HORVU.MOREX.r2.1HG0069340	HORVU.MOREX.r2.1HG0066930	0.828951	Guanine nucleotide-binding protein subunit beta-1	RNA binding protein
HORVU.MOREX.r2.6HG0469000	HORVU.MOREX.r2.1HG0067230	0.796718	Polyubiquitin	Non-specific serine/threonine protein kinase
HORVU.MOREX.r2.1HG0067230	HORVU.MOREX.r2.1HG0067230	1	Non-specific serine/threonine protein kinase	Non-specific serine/threonine protein kinase
HORVU.MOREX.r2.1HG0067400	HORVU.MOREX.r2.1HG0067400	1	Fatty acid oxidation complex subunit alpha	Fatty acid oxidation complex subunit alpha
HORVU.MOREX.r2.6HG0469000	HORVU.MOREX.r2.1HG0067490	0.767338	Polyubiquitin	Malate dehydrogenase
HORVU.MOREX.r2.1HG0067440	HORVU.MOREX.r2.1HG0067440	1	Like-COV protein	Like-COV protein
HORVU.MOREX.r2.3HG0209490	HORVU.MOREX.r2.1HG0067540	0.878671	50S ribosomal protein L3, putative	50S ribosomal protein L20
HORVU.MOREX.r2.3HG0232100	HORVU.MOREX.r2.1HG0067540	0.86361	50S ribosomal protein L15, putative, expressed	50S ribosomal protein L20
HORVU.MOREX.r2.1HG0067520	HORVU.MOREX.r2.1HG0067520	1	26S proteasome non-ATPase regulatory subunit 1	26S proteasome non-ATPase regulatory subunit 1
HORVU.MOREX.r2.4HG0336370	HORVU.MOREX.r2.1HG0068430	0.765772	Adenylosuccinate synthetase	Threonine synthase
HORVU.MOREX.r2.1HG0066450	HORVU.MOREX.r2.1HG0068430	0.78127	6-phosphogluconate dehydrogenase, decarboxylating	Threonine synthase
HORVU.MOREX.r2.6HG0474430	HORVU.MOREX.r2.1HG0068730	0.833293	Actin-related family protein	Serine/threonine-protein phosphatase
HORVU.MOREX.r2.1HG0050550	HORVU.MOREX.r2.1HG0068730	0.863088	DNA-directed RNA polymerase II subunit	Serine/threonine-protein phosphatase
HORVU.MOREX.r2.6HG0469000	HORVU.MOREX.r2.1HG0068730	0.815084	Polyubiquitin	Serine/threonine-protein phosphatase
HORVU.MOREX.r2.6HG0469000	HORVU.MOREX.r2.1HG0068780	0.81648	Polyubiquitin	GDP-mannose 4,6-dehydratase
HORVU.MOREX.r2.4HG0281090	HORVU.MOREX.r2.1HG0068780	0.876074	14-3-3 protein	GDP-mannose 4,6-dehydratase
HORVU.MOREX.r2.1HG0069020	HORVU.MOREX.r2.1HG0069020	1	Thymidine kinase	Thymidine kinase
HORVU.MOREX.r2.7HG0562070	HORVU.MOREX.r2.1HG0069010	0.837658	Ubiquinone biosynthesis protein COQ9, mitochondrial	1,2-dihydroxy-3-keto-5-methylthiopentene dioxygenase
HORVU.MOREX.r2.4HG0289970	HORVU.MOREX.r2.1HG0068990	0.910454	SWI/SNF complex subunit SWI3C	Heat shock transcription factor
HORVU.MOREX.r2.4HG0348600	HORVU.MOREX.r2.1HG0068990	0.789337	Heat shock transcription factor	Heat shock transcription factor
HORVU.MOREX.r2.5HG0410830	HORVU.MOREX.r2.1HG0069340	0.936407	CCR4-NOT transcription complex subunit 2	Guanine nucleotide-binding protein subunit beta-1
HORVU.MOREX.r2.5HG0431560	HORVU.MOREX.r2.1HG0069590	0.900607	U3 small nucleolar RNA-associated protein 18-like protein	Nucleolar family protein
HORVU.MOREX.r2.4HG0284740	HORVU.MOREX.r2.1HG0069590	0.94052	WD40 repeat-like protein	Nucleolar family protein
HORVU.MOREX.r2.1HG0003480	HORVU.MOREX.r2.1HG0069590	0.952113	Pumilio-like protein	Nucleolar family protein
HORVU.MOREX.r2.2HG0158620	HORVU.MOREX.r2.1HG0069590	0.775039	RNA binding protein	Nucleolar family protein
HORVU.MOREX.r2.5HG0356470	HORVU.MOREX.r2.1HG0069590	0.927586	Transducin/WD40 repeat protein	Nucleolar family protein
HORVU.MOREX.r2.7HG0549020	HORVU.MOREX.r2.1HG0069590	0.975082	Nucleolar GTP-binding protein 1	Nucleolar family protein
HORVU.MOREX.r2.1HG0069590	HORVU.MOREX.r2.1HG0069590	1	Nucleolar family protein	Nucleolar family protein
HORVU.MOREX.r2.3HG0236190	HORVU.MOREX.r2.1HG0069590	0.867069	KRR1 small subunit processome component	Nucleolar family protein
HORVU.MOREX.r2.3HG0225410	HORVU.MOREX.r2.1HG0069590	0.798832	N-alpha-acetyltransferase 16, NatA auxiliary subunit	Nucleolar family protein
HORVU.MOREX.r2.1HG0011220	HORVU.MOREX.r2.1HG0069590	0.973681	Polyribonucleotide nucleotidyltransferase	Nucleolar family protein
HORVU.MOREX.r2.3HG0231450	HORVU.MOREX.r2.1HG0069590	0.893899	Poly(A) polymerase	Nucleolar family protein
HORVU.MOREX.r2.4HG0284310	HORVU.MOREX.r2.1HG0069590	0.872553	Cyclin-like protein	Nucleolar family protein
HORVU.MOREX.r2.7HG0617800	HORVU.MOREX.r2.1HG0069590	0.977663	WD40 repeat-like protein	Nucleolar family protein
HORVU.MOREX.r2.1HG0071380	HORVU.MOREX.r2.1HG0069590	0.975476	WD40 repeat-like protein	Nucleolar family protein
HORVU.MOREX.r2.6HG0506700	HORVU.MOREX.r2.1HG0069590	0.99397	Ribosomal RNA small subunit methyltransferase b	Nucleolar family protein
HORVU.MOREX.r2.3HG0210540	HORVU.MOREX.r2.1HG0069590	0.86593	Syntaxin related protein	Nucleolar family protein
HORVU.MOREX.r2.2HG0173950	HORVU.MOREX.r2.1HG0069590	0.88882	Bystin	Nucleolar family protein
HORVU.MOREX.r2.7HG0588940	HORVU.MOREX.r2.1HG0069590	0.892573	U3 small nucleolar RNA-associated protein 14	Nucleolar family protein
HORVU.MOREX.r2.2HG0095700	HORVU.MOREX.r2.1HG0069590	0.957865	Ubiquitin carboxyl-terminal hydrolase	Nucleolar family protein
HORVU.MOREX.r2.5HG0355840	HORVU.MOREX.r2.1HG0069590	0.939974	Nucleolar and coiled-body phosphoprotein 1	Nucleolar family protein
HORVU.MOREX.r2.5HG0431990	HORVU.MOREX.r2.1HG0069590	0.811505	rRNA-processing protein efg1	Nucleolar family protein
HORVU.MOREX.r2.5HG0411320	HORVU.MOREX.r2.1HG0069590	0.855955	ATP-dependent zinc metalloprotease FtsH	Nucleolar family protein
HORVU.MOREX.r2.6HG0490110	HORVU.MOREX.r2.1HG0069590	0.93801	CCAAT/enhancer-binding protein zeta	Nucleolar family protein
HORVU.MOREX.r2.5HG0397940	HORVU.MOREX.r2.1HG0069590	0.95773	Ribosome production factor 2-like protein	Nucleolar family protein
HORVU.MOREX.r2.1HG0047070	HORVU.MOREX.r2.1HG0069830	0.87695	Signal peptidase I	ER membrane protein complex subunit 6
HORVU.MOREX.r2.1HG0023650	HORVU.MOREX.r2.1HG0069830	0.784852	Derlin	ER membrane protein complex subunit 6
HORVU.MOREX.r2.3HG0205390	HORVU.MOREX.r2.1HG0069830	0.82475	Gdt1-like protein chloroplastic-like	ER membrane protein complex subunit 6
HORVU.MOREX.r2.7HG0534430	HORVU.MOREX.r2.1HG0069830	0.770795	LMBR1-like membrane protein	ER membrane protein complex subunit 6
HORVU.MOREX.r2.4HG0280520	HORVU.MOREX.r2.1HG0069830	0.816509	SNARE associated Golgi protein family	ER membrane protein complex subunit 6
HORVU.MOREX.r2.4HG0332690	HORVU.MOREX.r2.1HG0069830	0.793292	Sulfate transporter	ER membrane protein complex subunit 6
HORVU.MOREX.r2.5HG0367400	HORVU.MOREX.r2.1HG0069830	0.776669	Lysine/histidine transporter	ER membrane protein complex subunit 6
HORVU.MOREX.r2.5HG0441500	HORVU.MOREX.r2.1HG0069830	0.824932	Post-GPI attachment to proteins factor 3	ER membrane protein complex subunit 6
HORVU.MOREX.r2.6HG0456210	HORVU.MOREX.r2.1HG0069830	0.808604	Protein DETOXIFICATION	ER membrane protein complex subunit 6
HORVU.MOREX.r2.4HG0309400	HORVU.MOREX.r2.1HG0069830	0.891462	TVP38/TMEM64 family membrane protein	ER membrane protein complex subunit 6
HORVU.MOREX.r2.4HG0333940	HORVU.MOREX.r2.1HG0069830	0.767671	ABC transporter G family member	ER membrane protein complex subunit 6
HORVU.MOREX.r2.6HG0490180	HORVU.MOREX.r2.1HG0069830	0.83819	transmembrane protein	ER membrane protein complex subunit 6
HORVU.MOREX.r2.1HG0050080	HORVU.MOREX.r2.1HG0069830	0.788927	Resistance to phytophthora 1 protein	ER membrane protein complex subunit 6
HORVU.MOREX.r2.2HG0147070	HORVU.MOREX.r2.1HG0069830	0.7888	Serine incorporator	ER membrane protein complex subunit 6
HORVU.MOREX.r2.7HG0608910	HORVU.MOREX.r2.1HG0069830	0.80165	Glutamate receptor	ER membrane protein complex subunit 6
HORVU.MOREX.r2.2HG0142800	HORVU.MOREX.r2.1HG0069830	0.788922	Endoplasmic reticulum-Golgi intermediate compartment protein 3	ER membrane protein complex subunit 6
HORVU.MOREX.r2.2HG0129090	HORVU.MOREX.r2.1HG0069830	0.777068	Protein DETOXIFICATION	ER membrane protein complex subunit 6
HORVU.MOREX.r2.2HG0177030	HORVU.MOREX.r2.1HG0069830	0.778071	Reticulon-like protein	ER membrane protein complex subunit 6
HORVU.MOREX.r2.1HG0031760	HORVU.MOREX.r2.1HG0070130	0.917437	60S ribosomal protein L21	60S ribosomal protein l35a
HORVU.MOREX.r2.4HG0314500	HORVU.MOREX.r2.1HG0070130	0.896812	Ribosomal protein L19	60S ribosomal protein l35a
HORVU.MOREX.r2.3HG0182650	HORVU.MOREX.r2.1HG0070130	0.911305	50S ribosomal protein L6	60S ribosomal protein l35a
HORVU.MOREX.r2.5HG0433840	HORVU.MOREX.r2.1HG0070130	0.936957	60S ribosomal protein L7	60S ribosomal protein l35a
HORVU.MOREX.r2.4HG0279970	HORVU.MOREX.r2.1HG0070130	0.856766	Pescadillo homolog	60S ribosomal protein l35a
HORVU.MOREX.r2.1HG0059160	HORVU.MOREX.r2.1HG0070130	0.920964	30S ribosomal protein S8, putative	60S ribosomal protein l35a
HORVU.MOREX.r2.3HG0250830	HORVU.MOREX.r2.1HG0070130	0.861615	Ribosomal protein	60S ribosomal protein l35a
HORVU.MOREX.r2.7HG0584290	HORVU.MOREX.r2.1HG0070130	0.783371	40S ribosomal protein S13	60S ribosomal protein l35a
HORVU.MOREX.r2.3HG0182620	HORVU.MOREX.r2.1HG0070130	0.878991	50S ribosomal protein L6	60S ribosomal protein l35a
HORVU.MOREX.r2.1HG0071380	HORVU.MOREX.r2.1HG0070130	0.910946	WD40 repeat-like protein	60S ribosomal protein l35a
HORVU.MOREX.r2.2HG0092650	HORVU.MOREX.r2.1HG0070130	0.86183	Ribosomal protein L19	60S ribosomal protein l35a
HORVU.MOREX.r2.7HG0577600	HORVU.MOREX.r2.1HG0070130	0.918519	60S ribosomal protein L13	60S ribosomal protein l35a
HORVU.MOREX.r2.2HG0132810	HORVU.MOREX.r2.1HG0070130	0.944717	50S ribosomal protein L29	60S ribosomal protein l35a
HORVU.MOREX.r2.3HG0236190	HORVU.MOREX.r2.1HG0070130	0.888407	KRR1 small subunit processome component	60S ribosomal protein l35a
HORVU.MOREX.r2.5HG0397940	HORVU.MOREX.r2.1HG0070130	0.924839	Ribosome production factor 2-like protein	60S ribosomal protein l35a
HORVU.MOREX.r2.1HG0026750	HORVU.MOREX.r2.1HG0070130	0.957038	40S ribosomal protein S3a	60S ribosomal protein l35a
HORVU.MOREX.r2.3HG0202480	HORVU.MOREX.r2.1HG0070130	0.826717	50S ribosomal protein L24	60S ribosomal protein l35a
HORVU.MOREX.r2.3HG0192970	HORVU.MOREX.r2.1HG0070130	0.931765	30S ribosomal protein S7	60S ribosomal protein l35a
HORVU.MOREX.r2.5HG0389360	HORVU.MOREX.r2.1HG0070130	0.936167	50S ribosomal protein L22	60S ribosomal protein l35a
HORVU.MOREX.r2.7HG0584220	HORVU.MOREX.r2.1HG0070130	0.907858	40S ribosomal protein S13	60S ribosomal protein l35a
HORVU.MOREX.r2.4HG0343460	HORVU.MOREX.r2.1HG0070130	0.906599	60S ribosomal protein L21	60S ribosomal protein l35a
HORVU.MOREX.r2.2HG0129270	HORVU.MOREX.r2.1HG0070130	0.90651	50S ribosomal protein L13	60S ribosomal protein l35a
HORVU.MOREX.r2.4HG0331970	HORVU.MOREX.r2.1HG0070130	0.887552	40S ribosomal protein S3a	60S ribosomal protein l35a
HORVU.MOREX.r2.1HG0018040	HORVU.MOREX.r2.1HG0070130	0.907989	40S ribosomal protein S4	60S ribosomal protein l35a
HORVU.MOREX.r2.5HG0431510	HORVU.MOREX.r2.1HG0070130	0.81543	60S ribosomal protein L4	60S ribosomal protein l35a
HORVU.MOREX.r2.6HG0484240	HORVU.MOREX.r2.1HG0070130	0.945431	40S ribosomal protein S24	60S ribosomal protein l35a
HORVU.MOREX.r2.3HG0253300	HORVU.MOREX.r2.1HG0070130	0.926223	30S ribosomal protein S12	60S ribosomal protein l35a
HORVU.MOREX.r2.2HG0115600	HORVU.MOREX.r2.1HG0070130	0.898739	60S ribosomal protein L44	60S ribosomal protein l35a
HORVU.MOREX.r2.7HG0528960	HORVU.MOREX.r2.1HG0070130	0.857673	50S ribosomal protein L6	60S ribosomal protein l35a
HORVU.MOREX.r2.7HG0568170	HORVU.MOREX.r2.1HG0070130	0.935433	60S ribosomal protein L7a	60S ribosomal protein l35a
HORVU.MOREX.r2.6HG0454200	HORVU.MOREX.r2.1HG0070130	0.918353	60S ribosomal protein L13	60S ribosomal protein l35a
HORVU.MOREX.r2.6HG0492210	HORVU.MOREX.r2.1HG0070130	0.841277	30S ribosomal protein S17	60S ribosomal protein l35a
HORVU.MOREX.r2.7HG0572270	HORVU.MOREX.r2.1HG0070130	0.932848	Ribosomal protein	60S ribosomal protein l35a
HORVU.MOREX.r2.5HG0421790	HORVU.MOREX.r2.1HG0070130	0.916291	60S ribosomal protein L5	60S ribosomal protein l35a
HORVU.MOREX.r2.2HG0120460	HORVU.MOREX.r2.1HG0070130	0.883258	Ribosomal protein L15	60S ribosomal protein l35a
HORVU.MOREX.r2.4HG0336330	HORVU.MOREX.r2.1HG0070130	0.862562	60S ribosomal protein L4	60S ribosomal protein l35a
HORVU.MOREX.r2.5HG0437010	HORVU.MOREX.r2.1HG0070130	0.840937	30S ribosomal protein S12	60S ribosomal protein l35a
HORVU.MOREX.r2.1HG0035670	HORVU.MOREX.r2.1HG0070130	0.915924	Nucleolar complex protein 2	60S ribosomal protein l35a
HORVU.MOREX.r2.1HG0020680	HORVU.MOREX.r2.1HG0070130	0.851283	Ribosomal protein	60S ribosomal protein l35a
HORVU.MOREX.r2.7HG0567650	HORVU.MOREX.r2.1HG0070130	0.950552	50S ribosomal protein L22	60S ribosomal protein l35a
HORVU.MOREX.r2.2HG0095700	HORVU.MOREX.r2.1HG0070130	0.831911	Ubiquitin carboxyl-terminal hydrolase	60S ribosomal protein l35a
HORVU.MOREX.r2.5HG0401170	HORVU.MOREX.r2.1HG0070130	0.880937	30S ribosomal protein S12	60S ribosomal protein l35a
HORVU.MOREX.r2.2HG0100920	HORVU.MOREX.r2.1HG0070130	0.968845	30S ribosomal protein S4	60S ribosomal protein l35a
HORVU.MOREX.r2.2HG0150190	HORVU.MOREX.r2.1HG0070130	0.909717	60S ribosomal protein L14, putative	60S ribosomal protein l35a
HORVU.MOREX.r2.5HG0409860	HORVU.MOREX.r2.1HG0070130	0.913308	60S ribosomal protein L7a	60S ribosomal protein l35a
HORVU.MOREX.r2.2HG0137370	HORVU.MOREX.r2.1HG0070130	0.954363	60S ribosomal protein L5	60S ribosomal protein l35a
HORVU.MOREX.r2.2HG0092790	HORVU.MOREX.r2.1HG0070130	0.936422	60S ribosomal protein L18	60S ribosomal protein l35a
HORVU.MOREX.r2.5HG0408510	HORVU.MOREX.r2.1HG0070130	0.90371	60S ribosomal protein L32	60S ribosomal protein l35a
HORVU.MOREX.r2.1HG0058860	HORVU.MOREX.r2.1HG0070130	0.908138	30S ribosomal protein S12	60S ribosomal protein l35a
HORVU.MOREX.r2.1HG0056230	HORVU.MOREX.r2.1HG0070130	0.909068	60S ribosomal protein L30	60S ribosomal protein l35a
HORVU.MOREX.r2.1HG0070130	HORVU.MOREX.r2.1HG0070130	1	60S ribosomal protein l35a	60S ribosomal protein l35a
HORVU.MOREX.r2.7HG0619260	HORVU.MOREX.r2.1HG0070130	0.906624	60S ribosomal protein L27	60S ribosomal protein l35a
HORVU.MOREX.r2.5HG0430630	HORVU.MOREX.r2.1HG0070130	0.933335	30S ribosomal protein S13	60S ribosomal protein l35a
HORVU.MOREX.r2.2HG0103970	HORVU.MOREX.r2.1HG0070130	0.885082	30S ribosomal protein S3	60S ribosomal protein l35a
HORVU.MOREX.r2.6HG0488990	HORVU.MOREX.r2.1HG0070130	0.909631	60S ribosomal protein L6	60S ribosomal protein l35a
HORVU.MOREX.r2.5HG0376740	HORVU.MOREX.r2.1HG0070130	0.91268	Ribosomal protein L3	60S ribosomal protein l35a
HORVU.MOREX.r2.4HG0314300	HORVU.MOREX.r2.1HG0070130	0.903149	Nucleolar GTP-binding protein 2	60S ribosomal protein l35a
HORVU.MOREX.r2.2HG0159710	HORVU.MOREX.r2.1HG0070130	0.929334	60S ribosomal protein L7	60S ribosomal protein l35a
HORVU.MOREX.r2.7HG0595620	HORVU.MOREX.r2.1HG0070130	0.895632	40S ribosomal protein S24	60S ribosomal protein l35a
HORVU.MOREX.r2.5HG0385560	HORVU.MOREX.r2.1HG0070130	0.829497	60S acidic ribosomal protein P0	60S ribosomal protein l35a
HORVU.MOREX.r2.5HG0382390	HORVU.MOREX.r2.1HG0070130	0.798509	Proteasome-associated protein ECM29-like protein	60S ribosomal protein l35a
HORVU.MOREX.r2.7HG0577670	HORVU.MOREX.r2.1HG0070130	0.827625	30S ribosomal protein S3	60S ribosomal protein l35a
HORVU.MOREX.r2.5HG0383630	HORVU.MOREX.r2.1HG0070130	0.909575	30S ribosomal protein S9	60S ribosomal protein l35a
HORVU.MOREX.r2.6HG0494180	HORVU.MOREX.r2.1HG0070130	0.943491	60S ribosomal protein L14, putative	60S ribosomal protein l35a
HORVU.MOREX.r2.4HG0294890	HORVU.MOREX.r2.1HG0070130	0.899675	30S ribosomal protein S9	60S ribosomal protein l35a
HORVU.MOREX.r2.2HG0158350	HORVU.MOREX.r2.1HG0070130	0.921769	30S ribosomal protein S17	60S ribosomal protein l35a
HORVU.MOREX.r2.1HG0018910	HORVU.MOREX.r2.1HG0070130	0.889292	60S ribosomal protein L18-like protein	60S ribosomal protein l35a
HORVU.MOREX.r2.3HG0252910	HORVU.MOREX.r2.1HG0070130	0.907975	30S ribosomal protein S8, putative	60S ribosomal protein l35a
HORVU.MOREX.r2.4HG0291480	HORVU.MOREX.r2.1HG0070130	0.930472	Ribosomal protein L3	60S ribosomal protein l35a
HORVU.MOREX.r2.4HG0294910	HORVU.MOREX.r2.1HG0070130	0.892911	30S ribosomal protein S9	60S ribosomal protein l35a
HORVU.MOREX.r2.5HG0378380	HORVU.MOREX.r2.1HG0070130	0.791443	30S ribosomal protein S4	60S ribosomal protein l35a
HORVU.MOREX.r2.7HG0608870	HORVU.MOREX.r2.1HG0070130	0.924575	60S ribosomal protein L44	60S ribosomal protein l35a
HORVU.MOREX.r2.6HG0506700	HORVU.MOREX.r2.1HG0070130	0.87412	Ribosomal RNA small subunit methyltransferase b	60S ribosomal protein l35a
HORVU.MOREX.r2.5HG0399730	HORVU.MOREX.r2.1HG0070120	0.933482	Eukaryotic translation initiation factor 3 subunit C	RuvB-like helicase
HORVU.MOREX.r2.5HG0426690	HORVU.MOREX.r2.1HG0070120	0.908315	Eukaryotic translation initiation factor 3 subunit C	RuvB-like helicase
HORVU.MOREX.r2.7HG0582810	HORVU.MOREX.r2.1HG0070120	0.790556	60S acidic ribosomal protein P0	RuvB-like helicase
HORVU.MOREX.r2.6HG0490320	HORVU.MOREX.r2.1HG0070120	0.896214	26S proteasome non-atpase regulatory subunit, putative	RuvB-like helicase
HORVU.MOREX.r2.3HG0212800	HORVU.MOREX.r2.1HG0070120	0.840858	Glutamate--tRNA ligase	RuvB-like helicase
HORVU.MOREX.r2.5HG0406360	HORVU.MOREX.r2.1HG0070120	0.940925	Eukaryotic translation initiation factor 3 subunit E	RuvB-like helicase
HORVU.MOREX.r2.5HG0394640	HORVU.MOREX.r2.1HG0070120	0.938062	Pre-mRNA-processing-splicing factor 8	RuvB-like helicase
HORVU.MOREX.r2.6HG0513890	HORVU.MOREX.r2.1HG0070120	0.768478	THO complex subunit 5	RuvB-like helicase
HORVU.MOREX.r2.1HG0011220	HORVU.MOREX.r2.1HG0070120	0.850513	Polyribonucleotide nucleotidyltransferase	RuvB-like helicase
HORVU.MOREX.r2.1HG0070270	HORVU.MOREX.r2.1HG0070270	1	1-deoxy-D-xylulose 5-phosphate synthase	1-deoxy-D-xylulose 5-phosphate synthase
HORVU.MOREX.r2.1HG0070320	HORVU.MOREX.r2.1HG0070320	1	Dynamin-related protein	Dynamin-related protein
HORVU.MOREX.r2.6HG0469000	HORVU.MOREX.r2.1HG0070320	0.805697	Polyubiquitin	Dynamin-related protein
HORVU.MOREX.r2.3HG0209490	HORVU.MOREX.r2.1HG0070820	0.916038	50S ribosomal protein L3, putative	50S ribosomal protein L21
HORVU.MOREX.r2.3HG0232100	HORVU.MOREX.r2.1HG0070820	0.920553	50S ribosomal protein L15, putative, expressed	50S ribosomal protein L21
HORVU.MOREX.r2.5HG0385560	HORVU.MOREX.r2.1HG0070950	0.857817	60S acidic ribosomal protein P0	Ribosomal protein
HORVU.MOREX.r2.6HG0458680	HORVU.MOREX.r2.1HG0070950	0.957075	Ribosome biogenesis regulatory protein-like protein	Ribosomal protein
HORVU.MOREX.r2.1HG0009950	HORVU.MOREX.r2.1HG0070950	0.841327	Ribosome biogenesis regulatory protein-like protein	Ribosomal protein
HORVU.MOREX.r2.5HG0419110	HORVU.MOREX.r2.1HG0071030	0.862682	Exosome complex component CSL4	Ribonuclease PH
HORVU.MOREX.r2.1HG0071030	HORVU.MOREX.r2.1HG0071030	1	Ribonuclease PH	Ribonuclease PH
HORVU.MOREX.r2.2HG0176090	HORVU.MOREX.r2.1HG0071140	0.764248	Auxin response factor	Auxin-responsive protein
HORVU.MOREX.r2.1HG0071140	HORVU.MOREX.r2.1HG0071140	1	Auxin-responsive protein	Auxin-responsive protein
HORVU.MOREX.r2.1HG0071150	HORVU.MOREX.r2.1HG0071150	1	Glutamate receptor	Glutamate receptor
HORVU.MOREX.r2.2HG0094430	HORVU.MOREX.r2.1HG0071380	0.970755	Nucleolar protein	WD40 repeat-like protein
HORVU.MOREX.r2.4HG0283890	HORVU.MOREX.r2.1HG0071380	0.8895	Transducin/WD-like repeat-protein	WD40 repeat-like protein
HORVU.MOREX.r2.1HG0003480	HORVU.MOREX.r2.1HG0071380	0.936719	Pumilio-like protein	WD40 repeat-like protein
HORVU.MOREX.r2.6HG0457760	HORVU.MOREX.r2.1HG0071380	0.896598	pumilio 9	WD40 repeat-like protein
HORVU.MOREX.r2.4HG0284740	HORVU.MOREX.r2.1HG0071380	0.934797	WD40 repeat-like protein	WD40 repeat-like protein
HORVU.MOREX.r2.5HG0419110	HORVU.MOREX.r2.1HG0071380	0.862329	Exosome complex component CSL4	WD40 repeat-like protein
HORVU.MOREX.r2.5HG0376250	HORVU.MOREX.r2.1HG0071380	0.903528	Nucleolar protein 6	WD40 repeat-like protein
HORVU.MOREX.r2.7HG0588940	HORVU.MOREX.r2.1HG0071380	0.899613	U3 small nucleolar RNA-associated protein 14	WD40 repeat-like protein
HORVU.MOREX.r2.5HG0431560	HORVU.MOREX.r2.1HG0071380	0.927921	U3 small nucleolar RNA-associated protein 18-like protein	WD40 repeat-like protein
HORVU.MOREX.r2.1HG0071380	HORVU.MOREX.r2.1HG0071380	1	WD40 repeat-like protein	WD40 repeat-like protein
HORVU.MOREX.r2.7HG0580620	HORVU.MOREX.r2.1HG0071380	0.898756	U3 small nucleolar ribonucleoprotein IMP4	WD40 repeat-like protein
HORVU.MOREX.r2.5HG0356470	HORVU.MOREX.r2.1HG0071380	0.943465	Transducin/WD40 repeat protein	WD40 repeat-like protein
HORVU.MOREX.r2.7HG0617800	HORVU.MOREX.r2.1HG0071380	0.965632	WD40 repeat-like protein	WD40 repeat-like protein
HORVU.MOREX.r2.2HG0125080	HORVU.MOREX.r2.1HG0071390	0.788246	Protein GRIP	Golgin candidate 5/TATA element modulatory factor
HORVU.MOREX.r2.5HG0441050	HORVU.MOREX.r2.1HG0071390	0.897942	Acyl-CoA-binding domain-containing protein 4	Golgin candidate 5/TATA element modulatory factor
HORVU.MOREX.r2.2HG0119140	HORVU.MOREX.r2.1HG0071390	0.880937	Ras-related protein	Golgin candidate 5/TATA element modulatory factor
HORVU.MOREX.r2.4HG0281100	HORVU.MOREX.r2.1HG0071390	0.847058	Protein CASP	Golgin candidate 5/TATA element modulatory factor
HORVU.MOREX.r2.5HG0401370	HORVU.MOREX.r2.1HG0072210	0.911558	Chloroplast lysine N-methyltransferase	Auxin response factor
HORVU.MOREX.r2.4HG0289970	HORVU.MOREX.r2.1HG0072210	0.935217	SWI/SNF complex subunit SWI3C	Auxin response factor
HORVU.MOREX.r2.1HG0072210	HORVU.MOREX.r2.1HG0072210	1	Auxin response factor	Auxin response factor
HORVU.MOREX.r2.1HG0072390	HORVU.MOREX.r2.1HG0072390	1	Splicing factor U2af small subunit A	Splicing factor U2af small subunit A
HORVU.MOREX.r2.1HG0070130	HORVU.MOREX.r2.1HG0072790	0.887748	60S ribosomal protein l35a	60S ribosomal protein L18a
HORVU.MOREX.r2.3HG0253280	HORVU.MOREX.r2.1HG0072790	0.800084	zinc finger CCCH domain protein	60S ribosomal protein L18a
HORVU.MOREX.r2.5HG0385560	HORVU.MOREX.r2.1HG0072790	0.915919	60S acidic ribosomal protein P0	60S ribosomal protein L18a
HORVU.MOREX.r2.6HG0488970	HORVU.MOREX.r2.1HG0072790	0.938687	Ribosome biogenesis protein BRX1-like protein	60S ribosomal protein L18a
HORVU.MOREX.r2.1HG0003480	HORVU.MOREX.r2.1HG0072790	0.891881	Pumilio-like protein	60S ribosomal protein L18a
HORVU.MOREX.r2.5HG0419700	HORVU.MOREX.r2.1HG0072790	0.947301	Ribosome biogenesis protein BOP1 homolog	60S ribosomal protein L18a
HORVU.MOREX.r2.2HG0095700	HORVU.MOREX.r2.1HG0072790	0.930492	Ubiquitin carboxyl-terminal hydrolase	60S ribosomal protein L18a
HORVU.MOREX.r2.1HG0011220	HORVU.MOREX.r2.1HG0072790	0.936462	Polyribonucleotide nucleotidyltransferase	60S ribosomal protein L18a
HORVU.MOREX.r2.7HG0588940	HORVU.MOREX.r2.1HG0072790	0.892488	U3 small nucleolar RNA-associated protein 14	60S ribosomal protein L18a
HORVU.MOREX.r2.2HG0141730	HORVU.MOREX.r2.1HG0072790	0.930251	Peptidylprolyl isomerase	60S ribosomal protein L18a
HORVU.MOREX.r2.3HG0236190	HORVU.MOREX.r2.1HG0072790	0.823727	KRR1 small subunit processome component	60S ribosomal protein L18a
HORVU.MOREX.r2.2HG0173950	HORVU.MOREX.r2.1HG0072790	0.918832	Bystin	60S ribosomal protein L18a
HORVU.MOREX.r2.1HG0035670	HORVU.MOREX.r2.1HG0072790	0.9104	Nucleolar complex protein 2	60S ribosomal protein L18a
HORVU.MOREX.r2.1HG0000700	HORVU.MOREX.r2.1HG0072790	0.823209	Transcription initiation factor TFIID subunit 6	60S ribosomal protein L18a
HORVU.MOREX.r2.7HG0549020	HORVU.MOREX.r2.1HG0072790	0.955327	Nucleolar GTP-binding protein 1	60S ribosomal protein L18a
HORVU.MOREX.r2.4HG0314300	HORVU.MOREX.r2.1HG0072790	0.92837	Nucleolar GTP-binding protein 2	60S ribosomal protein L18a
HORVU.MOREX.r2.5HG0376250	HORVU.MOREX.r2.1HG0072790	0.895141	Nucleolar protein 6	60S ribosomal protein L18a
HORVU.MOREX.r2.5HG0386930	HORVU.MOREX.r2.1HG0072790	0.804868	Peptidylprolyl isomerase	60S ribosomal protein L18a
HORVU.MOREX.r2.6HG0490110	HORVU.MOREX.r2.1HG0072790	0.940103	CCAAT/enhancer-binding protein zeta	60S ribosomal protein L18a
HORVU.MOREX.r2.4HG0332760	HORVU.MOREX.r2.1HG0072790	0.943566	RNA cytidine acetyltransferase	60S ribosomal protein L18a
HORVU.MOREX.r2.2HG0094430	HORVU.MOREX.r2.1HG0072790	0.926098	Nucleolar protein	60S ribosomal protein L18a
HORVU.MOREX.r2.2HG0129270	HORVU.MOREX.r2.1HG0072790	0.980431	50S ribosomal protein L13	60S ribosomal protein L18a
HORVU.MOREX.r2.1HG0078080	HORVU.MOREX.r2.1HG0072790	0.872951	Translation initiation factor if-2, putative	60S ribosomal protein L18a
HORVU.MOREX.r2.5HG0397940	HORVU.MOREX.r2.1HG0072790	0.935029	Ribosome production factor 2-like protein	60S ribosomal protein L18a
HORVU.MOREX.r2.2HG0092790	HORVU.MOREX.r2.1HG0072790	0.977303	60S ribosomal protein L18	60S ribosomal protein L18a
HORVU.MOREX.r2.5HG0439890	HORVU.MOREX.r2.1HG0072790	0.947972	Pumilio	60S ribosomal protein L18a
HORVU.MOREX.r2.2HG0165560	HORVU.MOREX.r2.1HG0072790	0.945201	Protein SDA1-like protein	60S ribosomal protein L18a
HORVU.MOREX.r2.6HG0469000	HORVU.MOREX.r2.1HG0073100	0.769472	Polyubiquitin	ABC transporter ATP-binding protein ARB1
HORVU.MOREX.r2.3HG0226630	HORVU.MOREX.r2.1HG0073250	0.765496	SGT1	GDP-mannose-3',5'-epimerase
HORVU.MOREX.r2.5HG0426900	HORVU.MOREX.r2.1HG0073230	0.843414	Receptor protein kinase-like protein	Kinase family protein
HORVU.MOREX.r2.2HG0126960	HORVU.MOREX.r2.1HG0073230	0.769923	Receptor kinase	Kinase family protein
HORVU.MOREX.r2.4HG0332820	HORVU.MOREX.r2.1HG0073230	0.863924	Cytochrome b561 and DOMON domain-containing protein	Kinase family protein
HORVU.MOREX.r2.2HG0086780	HORVU.MOREX.r2.1HG0073230	0.833912	SNARE-interacting protein KEULE	Kinase family protein
HORVU.MOREX.r2.3HG0240030	HORVU.MOREX.r2.1HG0073230	0.832656	tobamovirus multiplication protein	Kinase family protein
HORVU.MOREX.r2.2HG0171110	HORVU.MOREX.r2.1HG0073230	0.827134	Cyclic nucleotide-gated channel	Kinase family protein
HORVU.MOREX.r2.5HG0436750	HORVU.MOREX.r2.1HG0073230	0.846693	Amino acid transporter, putative	Kinase family protein
HORVU.MOREX.r2.5HG0399730	HORVU.MOREX.r2.1HG0073380	0.899181	Eukaryotic translation initiation factor 3 subunit C	Eukaryotic translation initiation factor 3 subunit D
HORVU.MOREX.r2.2HG0132970	HORVU.MOREX.r2.1HG0073380	0.925037	Eukaryotic translation initiation factor 3 subunit H	Eukaryotic translation initiation factor 3 subunit D
HORVU.MOREX.r2.6HG0516470	HORVU.MOREX.r2.1HG0073380	0.952955	Eukaryotic translation initiation factor 3 subunit G	Eukaryotic translation initiation factor 3 subunit D
HORVU.MOREX.r2.4HG0308470	HORVU.MOREX.r2.1HG0073380	0.961214	Eukaryotic translation initiation factor 3 subunit I	Eukaryotic translation initiation factor 3 subunit D
HORVU.MOREX.r2.7HG0567300	HORVU.MOREX.r2.1HG0073380	0.768862	Type I inositol-1,4,5-trisphosphate 5-phosphatase	Eukaryotic translation initiation factor 3 subunit D
HORVU.MOREX.r2.4HG0337620	HORVU.MOREX.r2.1HG0073380	0.928922	Eukaryotic translation initiation factor 3 subunit K	Eukaryotic translation initiation factor 3 subunit D
HORVU.MOREX.r2.6HG0458540	HORVU.MOREX.r2.1HG0073380	0.947381	Eukaryotic translation initiation factor 3 subunit F	Eukaryotic translation initiation factor 3 subunit D
HORVU.MOREX.r2.5HG0406360	HORVU.MOREX.r2.1HG0073380	0.931136	Eukaryotic translation initiation factor 3 subunit E	Eukaryotic translation initiation factor 3 subunit D
HORVU.MOREX.r2.5HG0426690	HORVU.MOREX.r2.1HG0073380	0.83738	Eukaryotic translation initiation factor 3 subunit C	Eukaryotic translation initiation factor 3 subunit D
HORVU.MOREX.r2.2HG0083030	HORVU.MOREX.r2.1HG0073380	0.956607	Eukaryotic translation initiation factor 3 subunit M	Eukaryotic translation initiation factor 3 subunit D
HORVU.MOREX.r2.3HG0186250	HORVU.MOREX.r2.1HG0073380	0.904495	Eukaryotic translation initiation factor 3 subunit A	Eukaryotic translation initiation factor 3 subunit D
HORVU.MOREX.r2.3HG0225160	HORVU.MOREX.r2.1HG0073450	0.78815	TPR repeat-containing thioredoxin TTL1	Chlorophyll a-b binding protein, chloroplastic
HORVU.MOREX.r2.3HG0232920	HORVU.MOREX.r2.1HG0073450	0.916466	Guanine nucleotide-binding protein beta subunit-like protein	Chlorophyll a-b binding protein, chloroplastic
HORVU.MOREX.r2.1HG0069340	HORVU.MOREX.r2.1HG0073450	0.846431	Guanine nucleotide-binding protein subunit beta-1	Chlorophyll a-b binding protein, chloroplastic
HORVU.MOREX.r2.5HG0365730	HORVU.MOREX.r2.1HG0073450	0.814244	Nuclear pore complex protein NUP93A	Chlorophyll a-b binding protein, chloroplastic
HORVU.MOREX.r2.3HG0232920	HORVU.MOREX.r2.1HG0073510	0.765648	Guanine nucleotide-binding protein beta subunit-like protein	Chlorophyll a-b binding protein, chloroplastic
HORVU.MOREX.r2.5HG0365730	HORVU.MOREX.r2.1HG0073510	0.85111	Nuclear pore complex protein NUP93A	Chlorophyll a-b binding protein, chloroplastic
HORVU.MOREX.r2.5HG0365730	HORVU.MOREX.r2.1HG0073500	0.786548	Nuclear pore complex protein NUP93A	Chlorophyll a-b binding protein, chloroplastic
HORVU.MOREX.r2.6HG0501850	HORVU.MOREX.r2.1HG0073710	0.904673	AP-2 complex subunit mu	GTPase Era
HORVU.MOREX.r2.5HG0385600	HORVU.MOREX.r2.1HG0073710	0.884318	Clathrin heavy chain	GTPase Era
HORVU.MOREX.r2.4HG0295930	HORVU.MOREX.r2.1HG0073710	0.868997	Clathrin heavy chain	GTPase Era
HORVU.MOREX.r2.6HG0523600	HORVU.MOREX.r2.1HG0073720	0.950745	rRNA 2'-O-methyltransferase fibrillarin 2	Ribosomal RNA large subunit methyltransferase E
HORVU.MOREX.r2.1HG0035670	HORVU.MOREX.r2.1HG0073720	0.941692	Nucleolar complex protein 2	Ribosomal RNA large subunit methyltransferase E
HORVU.MOREX.r2.2HG0141730	HORVU.MOREX.r2.1HG0073720	0.953989	Peptidylprolyl isomerase	Ribosomal RNA large subunit methyltransferase E
HORVU.MOREX.r2.4HG0279970	HORVU.MOREX.r2.1HG0073720	0.909937	Pescadillo homolog	Ribosomal RNA large subunit methyltransferase E
HORVU.MOREX.r2.1HG0003480	HORVU.MOREX.r2.1HG0073720	0.911198	Pumilio-like protein	Ribosomal RNA large subunit methyltransferase E
HORVU.MOREX.r2.2HG0090790	HORVU.MOREX.r2.1HG0073720	0.969919	Guanine nucleotide-binding-like protein	Ribosomal RNA large subunit methyltransferase E
HORVU.MOREX.r2.7HG0549020	HORVU.MOREX.r2.1HG0073720	0.961748	Nucleolar GTP-binding protein 1	Ribosomal RNA large subunit methyltransferase E
HORVU.MOREX.r2.1HG0073720	HORVU.MOREX.r2.1HG0073720	1	Ribosomal RNA large subunit methyltransferase E	Ribosomal RNA large subunit methyltransferase E
HORVU.MOREX.r2.5HG0397940	HORVU.MOREX.r2.1HG0073720	0.984089	Ribosome production factor 2-like protein	Ribosomal RNA large subunit methyltransferase E
HORVU.MOREX.r2.2HG0098990	HORVU.MOREX.r2.1HG0073720	0.911299	Eukaryotic translation initiation factor 6	Ribosomal RNA large subunit methyltransferase E
HORVU.MOREX.r2.5HG0421790	HORVU.MOREX.r2.1HG0073720	0.961128	60S ribosomal protein L5	Ribosomal RNA large subunit methyltransferase E
HORVU.MOREX.r2.5HG0386930	HORVU.MOREX.r2.1HG0073720	0.892294	Peptidylprolyl isomerase	Ribosomal RNA large subunit methyltransferase E
HORVU.MOREX.r2.5HG0369750	HORVU.MOREX.r2.1HG0073720	0.952042	Nucleolar complex 3-like protein	Ribosomal RNA large subunit methyltransferase E
HORVU.MOREX.r2.2HG0129270	HORVU.MOREX.r2.1HG0073720	0.93108	50S ribosomal protein L13	Ribosomal RNA large subunit methyltransferase E
HORVU.MOREX.r2.2HG0094430	HORVU.MOREX.r2.1HG0073720	0.975221	Nucleolar protein	Ribosomal RNA large subunit methyltransferase E
HORVU.MOREX.r2.1HG0074070	HORVU.MOREX.r2.1HG0074070	1	MYB transcription factor	MYB transcription factor
HORVU.MOREX.r2.1HG0074290	HORVU.MOREX.r2.1HG0074290	1	G-box binding factor	G-box binding factor
HORVU.MOREX.r2.1HG0074340	HORVU.MOREX.r2.1HG0074340	1	Ubiquitin ligase protein cop1, putative isoform 1	Ubiquitin ligase protein cop1, putative isoform 1
HORVU.MOREX.r2.3HG0246360	HORVU.MOREX.r2.1HG0074360	0.920465	Ribonuclease 3	Protein ROOT PRIMORDIUM DEFECTIVE 1
HORVU.MOREX.r2.7HG0566050	HORVU.MOREX.r2.1HG0074360	0.816661	Chloroplastic group IIA intron splicing facilitator CRS1, chloroplastic	Protein ROOT PRIMORDIUM DEFECTIVE 1
HORVU.MOREX.r2.1HG0074710	HORVU.MOREX.r2.1HG0074710	1	Ketol-acid reductoisomerase (NADP(+))	Ketol-acid reductoisomerase (NADP(+))
HORVU.MOREX.r2.6HG0478760	HORVU.MOREX.r2.1HG0074920	0.783709	26S protease regulatory subunit, putative	Proteasome subunit beta type
HORVU.MOREX.r2.7HG0541070	HORVU.MOREX.r2.1HG0074920	0.81952	Proteasome subunit beta type	Proteasome subunit beta type
HORVU.MOREX.r2.2HG0158360	HORVU.MOREX.r2.1HG0074920	0.811777	Cell differentiation protein rcd1, putative, expressed	Proteasome subunit beta type
HORVU.MOREX.r2.2HG0088730	HORVU.MOREX.r2.1HG0074920	0.780118	26S protease regulatory subunit	Proteasome subunit beta type
HORVU.MOREX.r2.3HG0237260	HORVU.MOREX.r2.1HG0074920	0.79852	Proteasome subunit alpha type	Proteasome subunit beta type
HORVU.MOREX.r2.4HG0338920	HORVU.MOREX.r2.1HG0074920	0.836102	60 kDa chaperonin	Proteasome subunit beta type
HORVU.MOREX.r2.4HG0337290	HORVU.MOREX.r2.1HG0074920	0.830023	Proteasome subunit alpha type	Proteasome subunit beta type
HORVU.MOREX.r2.5HG0444970	HORVU.MOREX.r2.1HG0074920	0.781637	26S proteasome non-ATPase regulatory subunit	Proteasome subunit beta type
HORVU.MOREX.r2.6HG0515910	HORVU.MOREX.r2.1HG0074920	0.801956	26S protease regulatory subunit	Proteasome subunit beta type
HORVU.MOREX.r2.5HG0411360	HORVU.MOREX.r2.1HG0074920	0.821753	Proteasome subunit beta type	Proteasome subunit beta type
HORVU.MOREX.r2.2HG0146120	HORVU.MOREX.r2.1HG0074920	0.847915	26S proteasome non-atpase regulatory subunit, putative	Proteasome subunit beta type
HORVU.MOREX.r2.1HG0075160	HORVU.MOREX.r2.1HG0075160	1	Mitogen-activated protein kinase	Mitogen-activated protein kinase
HORVU.MOREX.r2.1HG0075070	HORVU.MOREX.r2.1HG0075070	1	Protein CHUP1, chloroplastic	Protein CHUP1, chloroplastic
HORVU.MOREX.r2.2HG0094680	HORVU.MOREX.r2.1HG0075630	0.76761	Sodium/hydrogen exchanger	Sugar transporter protein
HORVU.MOREX.r2.5HG0404080	HORVU.MOREX.r2.1HG0075660	0.869133	Zinc-finger homeodomain protein 1	ZF-HD homeobox protein
HORVU.MOREX.r2.2HG0139610	HORVU.MOREX.r2.1HG0075660	0.901878	zinc finger homeodomain 1	ZF-HD homeobox protein
HORVU.MOREX.r2.1HG0075660	HORVU.MOREX.r2.1HG0075660	1	ZF-HD homeobox protein	ZF-HD homeobox protein
HORVU.MOREX.r2.1HG0069340	HORVU.MOREX.r2.1HG0075860	0.792037	Guanine nucleotide-binding protein subunit beta-1	Chaperone protein DnaJ
HORVU.MOREX.r2.2HG0138190	HORVU.MOREX.r2.1HG0075920	0.795906	Plastid-lipid associated protein PAP / fibrillin family protein	Solanesyl diphosphate synthase family protein
HORVU.MOREX.r2.1HG0075930	HORVU.MOREX.r2.1HG0075930	1	Mitogen-activated protein kinase	Mitogen-activated protein kinase
HORVU.MOREX.r2.1HG0049050	HORVU.MOREX.r2.1HG0076290	0.809756	Ran-binding protein 1 domain-containing	Glucan endo-1,3-beta-glucosidase 3
HORVU.MOREX.r2.1HG0076590	HORVU.MOREX.r2.1HG0076590	1	Indole-3-acetic acid-amido synthetase GH3.3	Indole-3-acetic acid-amido synthetase GH3.3
HORVU.MOREX.r2.2HG0095700	HORVU.MOREX.r2.1HG0076630	0.909456	Ubiquitin carboxyl-terminal hydrolase	Transducin/WD40 repeat-like superfamily protein
HORVU.MOREX.r2.1HG0003480	HORVU.MOREX.r2.1HG0076630	0.880312	Pumilio-like protein	Transducin/WD40 repeat-like superfamily protein
HORVU.MOREX.r2.2HG0094430	HORVU.MOREX.r2.1HG0076630	0.961004	Nucleolar protein	Transducin/WD40 repeat-like superfamily protein
HORVU.MOREX.r2.4HG0280470	HORVU.MOREX.r2.1HG0076630	0.781181	Zinc finger family protein	Transducin/WD40 repeat-like superfamily protein
HORVU.MOREX.r2.4HG0312690	HORVU.MOREX.r2.1HG0076630	0.958079	Peter Pan-like protein	Transducin/WD40 repeat-like superfamily protein
HORVU.MOREX.r2.5HG0421920	HORVU.MOREX.r2.1HG0076630	0.902012	Large subunit GTPase 1	Transducin/WD40 repeat-like superfamily protein
HORVU.MOREX.r2.6HG0488970	HORVU.MOREX.r2.1HG0076630	0.969639	Ribosome biogenesis protein BRX1-like protein	Transducin/WD40 repeat-like superfamily protein
HORVU.MOREX.r2.4HG0279970	HORVU.MOREX.r2.1HG0076630	0.924323	Pescadillo homolog	Transducin/WD40 repeat-like superfamily protein
HORVU.MOREX.r2.1HG0076630	HORVU.MOREX.r2.1HG0076630	1	Transducin/WD40 repeat-like superfamily protein	Transducin/WD40 repeat-like superfamily protein
HORVU.MOREX.r2.4HG0309240	HORVU.MOREX.r2.1HG0076630	0.799684	H/ACA ribonucleoprotein complex subunit 1-like protein 1	Transducin/WD40 repeat-like superfamily protein
HORVU.MOREX.r2.7HG0588940	HORVU.MOREX.r2.1HG0076630	0.963421	U3 small nucleolar RNA-associated protein 14	Transducin/WD40 repeat-like superfamily protein
HORVU.MOREX.r2.2HG0173950	HORVU.MOREX.r2.1HG0076630	0.959638	Bystin	Transducin/WD40 repeat-like superfamily protein
HORVU.MOREX.r2.7HG0549020	HORVU.MOREX.r2.1HG0076630	0.925664	Nucleolar GTP-binding protein 1	Transducin/WD40 repeat-like superfamily protein
HORVU.MOREX.r2.5HG0397940	HORVU.MOREX.r2.1HG0076630	0.971333	Ribosome production factor 2-like protein	Transducin/WD40 repeat-like superfamily protein
HORVU.MOREX.r2.1HG0035670	HORVU.MOREX.r2.1HG0076630	0.949813	Nucleolar complex protein 2	Transducin/WD40 repeat-like superfamily protein
HORVU.MOREX.r2.1HG0076940	HORVU.MOREX.r2.1HG0076940	1	TPR repeat-containing thioredoxin TTL1	TPR repeat-containing thioredoxin TTL1
HORVU.MOREX.r2.1HG0077060	HORVU.MOREX.r2.1HG0077060	1	Structural maintenance of chromosomes protein	Structural maintenance of chromosomes protein
HORVU.MOREX.r2.1HG0077460	HORVU.MOREX.r2.1HG0077460	1	Kinase family protein	Kinase family protein
HORVU.MOREX.r2.3HG0232920	HORVU.MOREX.r2.1HG0077450	0.772647	Guanine nucleotide-binding protein beta subunit-like protein	RNA binding protein
HORVU.MOREX.r2.1HG0077860	HORVU.MOREX.r2.1HG0077860	1	Transcription factor, putative	Transcription factor, putative
HORVU.MOREX.r2.3HG0213080	HORVU.MOREX.r2.1HG0077870	0.822766	ATP-dependent Clp protease proteolytic subunit	ATP-dependent Clp protease proteolytic subunit
HORVU.MOREX.r2.7HG0537160	HORVU.MOREX.r2.1HG0077870	0.908466	ATP-dependent Clp protease proteolytic subunit	ATP-dependent Clp protease proteolytic subunit
HORVU.MOREX.r2.2HG0138210	HORVU.MOREX.r2.1HG0077880	0.78052	Exocyst complex component, putative	2-aminoethanethiol dioxygenase
HORVU.MOREX.r2.6HG0516470	HORVU.MOREX.r2.1HG0078080	0.81609	Eukaryotic translation initiation factor 3 subunit G	Translation initiation factor if-2, putative
HORVU.MOREX.r2.7HG0584380	HORVU.MOREX.r2.1HG0078080	0.863634	60S acidic ribosomal protein P1	Translation initiation factor if-2, putative
HORVU.MOREX.r2.6HG0490110	HORVU.MOREX.r2.1HG0078080	0.909331	CCAAT/enhancer-binding protein zeta	Translation initiation factor if-2, putative
HORVU.MOREX.r2.5HG0363530	HORVU.MOREX.r2.1HG0078080	0.894453	Elongation factor Tu	Translation initiation factor if-2, putative
HORVU.MOREX.r2.2HG0129270	HORVU.MOREX.r2.1HG0078080	0.832786	50S ribosomal protein L13	Translation initiation factor if-2, putative
HORVU.MOREX.r2.1HG0003480	HORVU.MOREX.r2.1HG0078080	0.800229	Pumilio-like protein	Translation initiation factor if-2, putative
HORVU.MOREX.r2.3HG0236190	HORVU.MOREX.r2.1HG0078080	0.790015	KRR1 small subunit processome component	Translation initiation factor if-2, putative
HORVU.MOREX.r2.5HG0399730	HORVU.MOREX.r2.1HG0078080	0.917583	Eukaryotic translation initiation factor 3 subunit C	Translation initiation factor if-2, putative
HORVU.MOREX.r2.5HG0439890	HORVU.MOREX.r2.1HG0078080	0.881512	Pumilio	Translation initiation factor if-2, putative
HORVU.MOREX.r2.3HG0253280	HORVU.MOREX.r2.1HG0078080	0.765837	zinc finger CCCH domain protein	Translation initiation factor if-2, putative
HORVU.MOREX.r2.4HG0286500	HORVU.MOREX.r2.1HG0078080	0.767386	Eukaryotic translation initiation factor 3 subunit B	Translation initiation factor if-2, putative
HORVU.MOREX.r2.2HG0095700	HORVU.MOREX.r2.1HG0078080	0.85712	Ubiquitin carboxyl-terminal hydrolase	Translation initiation factor if-2, putative
HORVU.MOREX.r2.1HG0078200	HORVU.MOREX.r2.1HG0078200	1	V-type proton ATPase subunit C	V-type proton ATPase subunit C
HORVU.MOREX.r2.1HG0025600	HORVU.MOREX.r2.1HG0078260	0.773219	Abscisic acid receptor	Phosphatase 2C
HORVU.MOREX.r2.4HG0281020	HORVU.MOREX.r2.1HG0078260	0.804833	Actin	Phosphatase 2C
HORVU.MOREX.r2.1HG0078290	HORVU.MOREX.r2.1HG0078290	1	TATA-binding protein associated factor-like protein	TATA-binding protein associated factor-like protein
HORVU.MOREX.r2.7HG0611310	HORVU.MOREX.r2.1HG0078310	0.792466	ATP-dependent zinc metalloprotease FTSH protein	ATP-dependent zinc metalloprotease FTSH protein
HORVU.MOREX.r2.1HG0078310	HORVU.MOREX.r2.1HG0078310	1	ATP-dependent zinc metalloprotease FTSH protein	ATP-dependent zinc metalloprotease FTSH protein
HORVU.MOREX.r2.1HG0078380	HORVU.MOREX.r2.1HG0078380	1	Protein kinase	Protein kinase
HORVU.MOREX.r2.1HG0078580	HORVU.MOREX.r2.1HG0078580	1	Non-specific serine/threonine protein kinase	Non-specific serine/threonine protein kinase
HORVU.MOREX.r2.1HG0078510	HORVU.MOREX.r2.1HG0078510	1	UDP-glucose-4-epimerase	UDP-glucose-4-epimerase
HORVU.MOREX.r2.1HG0003480	HORVU.MOREX.r2.2HG0079720	0.834806	Pumilio-like protein	tRNA-dihydrouridine(47) synthase [NAD(P)(+)]
HORVU.MOREX.r2.7HG0540790	HORVU.MOREX.r2.2HG0079830	0.888255	2,3,4,5-tetrahydropyridine-2,6-dicarboxylate N-acetyltransferase	TOM1-like protein 2
HORVU.MOREX.r2.6HG0469000	HORVU.MOREX.r2.2HG0079930	0.792807	Polyubiquitin	Protein transport Sec24-like protein
HORVU.MOREX.r2.3HG0265860	HORVU.MOREX.r2.2HG0079930	0.76869	Endo-1,3-beta-glucanase	Protein transport Sec24-like protein
HORVU.MOREX.r2.5HG0403270	HORVU.MOREX.r2.2HG0079930	0.788538	Protein transport protein SEC23	Protein transport Sec24-like protein
HORVU.MOREX.r2.4HG0309820	HORVU.MOREX.r2.2HG0079930	0.931013	Protein transport protein SEC23	Protein transport Sec24-like protein
HORVU.MOREX.r2.4HG0285270	HORVU.MOREX.r2.2HG0080150	0.81944	Thioredoxin	Fructokinase-2
HORVU.MOREX.r2.1HG0031470	HORVU.MOREX.r2.2HG0080150	0.83077	Pentatricopeptide repeat-containing protein	Fructokinase-2
HORVU.MOREX.r2.5HG0438740	HORVU.MOREX.r2.2HG0080150	0.859662	Pentatricopeptide repeat-containing protein	Fructokinase-2
HORVU.MOREX.r2.1HG0044020	HORVU.MOREX.r2.2HG0080150	0.83485	UDP-N-acetylmuramoyl-L-alanyl-D-glutamate--2, 6-diaminopimelate ligase	Fructokinase-2
HORVU.MOREX.r2.3HG0205390	HORVU.MOREX.r2.2HG0080140	0.818866	Gdt1-like protein chloroplastic-like	Cytochrome P450 family protein
HORVU.MOREX.r2.2HG0143420	HORVU.MOREX.r2.2HG0080140	0.790548	14-3-3 protein	Cytochrome P450 family protein
HORVU.MOREX.r2.5HG0365170	HORVU.MOREX.r2.2HG0081770	0.868604	DNA repair protein Rad50	Actin-related protein
HORVU.MOREX.r2.3HG0232920	HORVU.MOREX.r2.2HG0082480	0.77667	Guanine nucleotide-binding protein beta subunit-like protein	Arginase
HORVU.MOREX.r2.2HG0082480	HORVU.MOREX.r2.2HG0082480	1	Arginase	Arginase
HORVU.MOREX.r2.1HG0069340	HORVU.MOREX.r2.2HG0082480	0.802505	Guanine nucleotide-binding protein subunit beta-1	Arginase
HORVU.MOREX.r2.2HG0157340	HORVU.MOREX.r2.2HG0082620	0.816702	Receptor-like kinase	Stress responsive A/B barrel domain protein
HORVU.MOREX.r2.6HG0497950	HORVU.MOREX.r2.2HG0082620	0.92559	Receptor-like kinase	Stress responsive A/B barrel domain protein
HORVU.MOREX.r2.3HG0203430	HORVU.MOREX.r2.2HG0082620	0.858134	Receptor-like kinase	Stress responsive A/B barrel domain protein
HORVU.MOREX.r2.5HG0424570	HORVU.MOREX.r2.2HG0082620	0.778179	Potassium channel	Stress responsive A/B barrel domain protein
HORVU.MOREX.r2.2HG0155090	HORVU.MOREX.r2.2HG0082620	0.878958	Cytochrome P450	Stress responsive A/B barrel domain protein
HORVU.MOREX.r2.6HG0489200	HORVU.MOREX.r2.2HG0082620	0.789613	Alkaline phosphatase D	Stress responsive A/B barrel domain protein
HORVU.MOREX.r2.4HG0320300	HORVU.MOREX.r2.2HG0082620	0.842632	Phosphoinositide phospholipase C	Stress responsive A/B barrel domain protein
HORVU.MOREX.r2.3HG0255410	HORVU.MOREX.r2.2HG0082620	0.85135	Calcium sensing receptor, chloroplastic	Stress responsive A/B barrel domain protein
HORVU.MOREX.r2.2HG0117650	HORVU.MOREX.r2.2HG0082620	0.805352	Organic solute transporter-like	Stress responsive A/B barrel domain protein
HORVU.MOREX.r2.4HG0319410	HORVU.MOREX.r2.2HG0082710	0.833136	Eukaryotic translation initiation factor 2 subunit alpha	Cullin-associated NEDD8-dissociated protein 1
HORVU.MOREX.r2.2HG0089200	HORVU.MOREX.r2.2HG0082710	0.942166	Eukaryotic translation initiation factor 2 subunit alpha	Cullin-associated NEDD8-dissociated protein 1
HORVU.MOREX.r2.1HG0070120	HORVU.MOREX.r2.2HG0083030	0.953148	RuvB-like helicase	Eukaryotic translation initiation factor 3 subunit M
HORVU.MOREX.r2.5HG0406360	HORVU.MOREX.r2.2HG0083030	0.962683	Eukaryotic translation initiation factor 3 subunit E	Eukaryotic translation initiation factor 3 subunit M
HORVU.MOREX.r2.6HG0516470	HORVU.MOREX.r2.2HG0083030	0.939344	Eukaryotic translation initiation factor 3 subunit G	Eukaryotic translation initiation factor 3 subunit M
HORVU.MOREX.r2.5HG0426690	HORVU.MOREX.r2.2HG0083030	0.874223	Eukaryotic translation initiation factor 3 subunit C	Eukaryotic translation initiation factor 3 subunit M
HORVU.MOREX.r2.5HG0399730	HORVU.MOREX.r2.2HG0083030	0.956354	Eukaryotic translation initiation factor 3 subunit C	Eukaryotic translation initiation factor 3 subunit M
HORVU.MOREX.r2.4HG0308470	HORVU.MOREX.r2.2HG0083030	0.97448	Eukaryotic translation initiation factor 3 subunit I	Eukaryotic translation initiation factor 3 subunit M
HORVU.MOREX.r2.2HG0083470	HORVU.MOREX.r2.2HG0083470	1	Mortality factor 4-like protein 1	Mortality factor 4-like protein 1
HORVU.MOREX.r2.2HG0098330	HORVU.MOREX.r2.2HG0083700	0.852756	2,3,4,5-tetrahydropyridine-2,6-dicarboxylate N-acetyltransferase	Nuclear transport factor 2 (NTF2)-like protein
HORVU.MOREX.r2.2HG0171360	HORVU.MOREX.r2.2HG0083700	0.855624	Protein vip1	Nuclear transport factor 2 (NTF2)-like protein
HORVU.MOREX.r2.7HG0540790	HORVU.MOREX.r2.2HG0083700	0.797164	2,3,4,5-tetrahydropyridine-2,6-dicarboxylate N-acetyltransferase	Nuclear transport factor 2 (NTF2)-like protein
HORVU.MOREX.r2.4HG0337290	HORVU.MOREX.r2.2HG0084300	0.767584	Proteasome subunit alpha type	60 kDa chaperonin
HORVU.MOREX.r2.4HG0279230	HORVU.MOREX.r2.2HG0084440	0.831643	NRT1/PTR family protein 2.2	Serine/threonine-protein kinase
HORVU.MOREX.r2.7HG0618650	HORVU.MOREX.r2.2HG0084440	0.842663	Protein kinase, putative	Serine/threonine-protein kinase
HORVU.MOREX.r2.4HG0337780	HORVU.MOREX.r2.2HG0084440	0.792443	Receptor-like protein kinase	Serine/threonine-protein kinase
HORVU.MOREX.r2.1HG0069340	HORVU.MOREX.r2.2HG0084490	0.780581	Guanine nucleotide-binding protein subunit beta-1	Pumilio-like protein
HORVU.MOREX.r2.3HG0254300	HORVU.MOREX.r2.2HG0085280	0.933468	Vacuolar protein sorting-associated protein 53	Vacuolar protein sorting-associated protein 54
HORVU.MOREX.r2.7HG0567790	HORVU.MOREX.r2.2HG0085310	0.810731	Serine/threonine-protein kinase RIO1	Vacuolar protein-sorting protein 33
HORVU.MOREX.r2.2HG0085310	HORVU.MOREX.r2.2HG0085310	1	Vacuolar protein-sorting protein 33	Vacuolar protein-sorting protein 33
HORVU.MOREX.r2.2HG0085780	HORVU.MOREX.r2.2HG0085780	1	FACT complex subunit SPT16	FACT complex subunit SPT16
HORVU.MOREX.r2.7HG0559660	HORVU.MOREX.r2.2HG0085780	0.783238	RING/U-box superfamily protein	FACT complex subunit SPT16
HORVU.MOREX.r2.2HG0085920	HORVU.MOREX.r2.2HG0085920	1	Glucose-6-phosphate 1-dehydrogenase	Glucose-6-phosphate 1-dehydrogenase
HORVU.MOREX.r2.5HG0369400	HORVU.MOREX.r2.2HG0085980	0.774076	Conserved oligomeric Golgi complex subunit 8	Ribulose bisphosphate carboxylase small chain
HORVU.MOREX.r2.5HG0369400	HORVU.MOREX.r2.2HG0086010	0.774253	Conserved oligomeric Golgi complex subunit 8	Ribulose bisphosphate carboxylase small chain
HORVU.MOREX.r2.1HG0052310	HORVU.MOREX.r2.2HG0085980	0.768816	KH domain-containing protein	Ribulose bisphosphate carboxylase small chain
HORVU.MOREX.r2.1HG0052310	HORVU.MOREX.r2.2HG0086010	0.768992	KH domain-containing protein	Ribulose bisphosphate carboxylase small chain
HORVU.MOREX.r2.7HG0618510	HORVU.MOREX.r2.2HG0086020	0.766967	Ubiquitin system component Cue protein, putative	Ribulose bisphosphate carboxylase small chain
HORVU.MOREX.r2.6HG0504040	HORVU.MOREX.r2.2HG0085980	0.849864	Protein KINESIN LIGHT CHAIN-RELATED 3	Ribulose bisphosphate carboxylase small chain
HORVU.MOREX.r2.6HG0504040	HORVU.MOREX.r2.2HG0086010	0.850378	Protein KINESIN LIGHT CHAIN-RELATED 3	Ribulose bisphosphate carboxylase small chain
HORVU.MOREX.r2.6HG0504040	HORVU.MOREX.r2.2HG0086020	0.860291	Protein KINESIN LIGHT CHAIN-RELATED 3	Ribulose bisphosphate carboxylase small chain
HORVU.MOREX.r2.2HG0092650	HORVU.MOREX.r2.2HG0086170	0.932533	Ribosomal protein L19	40S ribosomal protein S6
HORVU.MOREX.r2.7HG0528960	HORVU.MOREX.r2.2HG0086170	0.923771	50S ribosomal protein L6	40S ribosomal protein S6
HORVU.MOREX.r2.4HG0331970	HORVU.MOREX.r2.2HG0086170	0.949987	40S ribosomal protein S3a	40S ribosomal protein S6
HORVU.MOREX.r2.3HG0182650	HORVU.MOREX.r2.2HG0086170	0.965414	50S ribosomal protein L6	40S ribosomal protein S6
HORVU.MOREX.r2.3HG0192970	HORVU.MOREX.r2.2HG0086170	0.978757	30S ribosomal protein S7	40S ribosomal protein S6
HORVU.MOREX.r2.3HG0182620	HORVU.MOREX.r2.2HG0086170	0.931761	50S ribosomal protein L6	40S ribosomal protein S6
HORVU.MOREX.r2.1HG0066030	HORVU.MOREX.r2.2HG0086170	0.96723	Nucleosome assembly protein 1-like 1	40S ribosomal protein S6
HORVU.MOREX.r2.1HG0026750	HORVU.MOREX.r2.2HG0086170	0.979118	40S ribosomal protein S3a	40S ribosomal protein S6
HORVU.MOREX.r2.6HG0488990	HORVU.MOREX.r2.2HG0086170	0.966814	60S ribosomal protein L6	40S ribosomal protein S6
HORVU.MOREX.r2.4HG0314500	HORVU.MOREX.r2.2HG0086170	0.958438	Ribosomal protein L19	40S ribosomal protein S6
HORVU.MOREX.r2.2HG0086230	HORVU.MOREX.r2.2HG0086230	1	Aquaporin	Aquaporin
HORVU.MOREX.r2.6HG0480070	HORVU.MOREX.r2.2HG0086770	0.827836	Protein CLP1 homolog	Cleavage and polyadenylation specificity factor subunit 1
HORVU.MOREX.r2.5HG0429640	HORVU.MOREX.r2.2HG0086780	0.925588	Syntaxin, putative	SNARE-interacting protein KEULE
HORVU.MOREX.r2.6HG0469000	HORVU.MOREX.r2.2HG0086780	0.846536	Polyubiquitin	SNARE-interacting protein KEULE
HORVU.MOREX.r2.6HG0509770	HORVU.MOREX.r2.2HG0086780	0.953273	Exocyst complex component SEC6	SNARE-interacting protein KEULE
HORVU.MOREX.r2.2HG0086880	HORVU.MOREX.r2.2HG0086880	1	RNA-binding family protein	RNA-binding family protein
HORVU.MOREX.r2.4HG0341290	HORVU.MOREX.r2.2HG0087060	0.8117	Thiol-disulfide oxidoreductase LTO1	Chaperone protein DnaJ
HORVU.MOREX.r2.4HG0343460	HORVU.MOREX.r2.2HG0087460	0.776491	60S ribosomal protein L21	Acetyltransferase component of pyruvate dehydrogenase complex
HORVU.MOREX.r2.1HG0031760	HORVU.MOREX.r2.2HG0087460	0.770114	60S ribosomal protein L21	Acetyltransferase component of pyruvate dehydrogenase complex
HORVU.MOREX.r2.5HG0446420	HORVU.MOREX.r2.2HG0087620	0.773501	Sucrose nonfermenting 4-like protein	Amine oxidase
HORVU.MOREX.r2.2HG0087700	HORVU.MOREX.r2.2HG0087700	1	L-lactate dehydrogenase	L-lactate dehydrogenase
HORVU.MOREX.r2.4HG0331210	HORVU.MOREX.r2.2HG0088380	0.82116	Protein kinase	UvrABC system protein C
HORVU.MOREX.r2.7HG0541070	HORVU.MOREX.r2.2HG0088730	0.936762	Proteasome subunit beta type	26S protease regulatory subunit
HORVU.MOREX.r2.4HG0344580	HORVU.MOREX.r2.2HG0088730	0.794721	Protein kinase	26S protease regulatory subunit
HORVU.MOREX.r2.2HG0088790	HORVU.MOREX.r2.2HG0088790	1	AMP deaminase	AMP deaminase
HORVU.MOREX.r2.4HG0304030	HORVU.MOREX.r2.2HG0089200	0.799312	WD40 repeat-like protein	Eukaryotic translation initiation factor 2 subunit alpha
HORVU.MOREX.r2.4HG0315180	HORVU.MOREX.r2.2HG0089200	0.947569	Eukaryotic translation initiation factor 2 beta subunit, putative, expressed	Eukaryotic translation initiation factor 2 subunit alpha
HORVU.MOREX.r2.4HG0348600	HORVU.MOREX.r2.2HG0089210	0.778492	Heat shock transcription factor	Heat shock transcription factor
HORVU.MOREX.r2.4HG0289970	HORVU.MOREX.r2.2HG0089210	0.916858	SWI/SNF complex subunit SWI3C	Heat shock transcription factor
HORVU.MOREX.r2.2HG0089260	HORVU.MOREX.r2.2HG0089260	1	SNF2 domain-containing protein / helicase domain-containing protein	SNF2 domain-containing protein / helicase domain-containing protein
HORVU.MOREX.r2.5HG0421920	HORVU.MOREX.r2.2HG0090790	0.935737	Large subunit GTPase 1	Guanine nucleotide-binding-like protein
HORVU.MOREX.r2.4HG0312690	HORVU.MOREX.r2.2HG0090790	0.974669	Peter Pan-like protein	Guanine nucleotide-binding-like protein
HORVU.MOREX.r2.5HG0419700	HORVU.MOREX.r2.2HG0090790	0.951375	Ribosome biogenesis protein BOP1 homolog	Guanine nucleotide-binding-like protein
HORVU.MOREX.r2.6HG0506700	HORVU.MOREX.r2.2HG0090790	0.93338	Ribosomal RNA small subunit methyltransferase b	Guanine nucleotide-binding-like protein
HORVU.MOREX.r2.7HG0549020	HORVU.MOREX.r2.2HG0090790	0.944993	Nucleolar GTP-binding protein 1	Guanine nucleotide-binding-like protein
HORVU.MOREX.r2.1HG0035670	HORVU.MOREX.r2.2HG0090790	0.970199	Nucleolar complex protein 2	Guanine nucleotide-binding-like protein
HORVU.MOREX.r2.6HG0457760	HORVU.MOREX.r2.2HG0090790	0.964954	pumilio 9	Guanine nucleotide-binding-like protein
HORVU.MOREX.r2.4HG0324790	HORVU.MOREX.r2.2HG0090790	0.948883	Importin-4	Guanine nucleotide-binding-like protein
HORVU.MOREX.r2.2HG0129270	HORVU.MOREX.r2.2HG0090790	0.944369	50S ribosomal protein L13	Guanine nucleotide-binding-like protein
HORVU.MOREX.r2.4HG0314300	HORVU.MOREX.r2.2HG0090790	0.957044	Nucleolar GTP-binding protein 2	Guanine nucleotide-binding-like protein
HORVU.MOREX.r2.2HG0165560	HORVU.MOREX.r2.2HG0090790	0.980704	Protein SDA1-like protein	Guanine nucleotide-binding-like protein
HORVU.MOREX.r2.2HG0105280	HORVU.MOREX.r2.2HG0090790	0.970048	Ribosome biogenesis protein WDR12 homolog	Guanine nucleotide-binding-like protein
HORVU.MOREX.r2.2HG0095700	HORVU.MOREX.r2.2HG0090790	0.903924	Ubiquitin carboxyl-terminal hydrolase	Guanine nucleotide-binding-like protein
HORVU.MOREX.r2.1HG0003480	HORVU.MOREX.r2.2HG0090790	0.892807	Pumilio-like protein	Guanine nucleotide-binding-like protein
HORVU.MOREX.r2.2HG0092790	HORVU.MOREX.r2.2HG0090790	0.978317	60S ribosomal protein L18	Guanine nucleotide-binding-like protein
HORVU.MOREX.r2.6HG0488970	HORVU.MOREX.r2.2HG0090790	0.974666	Ribosome biogenesis protein BRX1-like protein	Guanine nucleotide-binding-like protein
HORVU.MOREX.r2.2HG0098990	HORVU.MOREX.r2.2HG0090790	0.927307	Eukaryotic translation initiation factor 6	Guanine nucleotide-binding-like protein
HORVU.MOREX.r2.6HG0490110	HORVU.MOREX.r2.2HG0090790	0.959849	CCAAT/enhancer-binding protein zeta	Guanine nucleotide-binding-like protein
HORVU.MOREX.r2.5HG0421790	HORVU.MOREX.r2.2HG0090790	0.970618	60S ribosomal protein L5	Guanine nucleotide-binding-like protein
HORVU.MOREX.r2.7HG0588940	HORVU.MOREX.r2.2HG0090790	0.973386	U3 small nucleolar RNA-associated protein 14	Guanine nucleotide-binding-like protein
HORVU.MOREX.r2.4HG0279970	HORVU.MOREX.r2.2HG0090790	0.894483	Pescadillo homolog	Guanine nucleotide-binding-like protein
HORVU.MOREX.r2.3HG0232100	HORVU.MOREX.r2.2HG0090790	0.874084	50S ribosomal protein L15, putative, expressed	Guanine nucleotide-binding-like protein
HORVU.MOREX.r2.5HG0397940	HORVU.MOREX.r2.2HG0090790	0.974755	Ribosome production factor 2-like protein	Guanine nucleotide-binding-like protein
HORVU.MOREX.r2.1HG0011220	HORVU.MOREX.r2.2HG0090790	0.919939	Polyribonucleotide nucleotidyltransferase	Guanine nucleotide-binding-like protein
HORVU.MOREX.r2.4HG0280470	HORVU.MOREX.r2.2HG0090790	0.804912	Zinc finger family protein	Guanine nucleotide-binding-like protein
HORVU.MOREX.r2.3HG0253280	HORVU.MOREX.r2.2HG0090790	0.898956	zinc finger CCCH domain protein	Guanine nucleotide-binding-like protein
HORVU.MOREX.r2.7HG0591270	HORVU.MOREX.r2.2HG0090790	0.963382	Pre-rRNA-processing protein TSR1-like protein	Guanine nucleotide-binding-like protein
HORVU.MOREX.r2.2HG0093330	HORVU.MOREX.r2.2HG0090790	0.892002	Ribosomal protein S8e/ribosomal biogenesis NSA2	Guanine nucleotide-binding-like protein
HORVU.MOREX.r2.3HG0236190	HORVU.MOREX.r2.2HG0090790	0.9089	KRR1 small subunit processome component	Guanine nucleotide-binding-like protein
HORVU.MOREX.r2.5HG0354740	HORVU.MOREX.r2.2HG0090790	0.97437	60S ribosomal protein L24	Guanine nucleotide-binding-like protein
HORVU.MOREX.r2.2HG0093470	HORVU.MOREX.r2.2HG0090790	0.873811	60S ribosome subunit biogenesis protein NIP7 homolog	Guanine nucleotide-binding-like protein
HORVU.MOREX.r2.2HG0090860	HORVU.MOREX.r2.2HG0090860	1	Non-specific serine/threonine protein kinase	Non-specific serine/threonine protein kinase
HORVU.MOREX.r2.2HG0090910	HORVU.MOREX.r2.2HG0090910	1	2-dehydro-3-deoxyphosphooctonate aldolase	2-dehydro-3-deoxyphosphooctonate aldolase
HORVU.MOREX.r2.6HG0469000	HORVU.MOREX.r2.2HG0091120	0.810801	Polyubiquitin	Imidazoleglycerol-phosphate dehydratase
HORVU.MOREX.r2.2HG0091320	HORVU.MOREX.r2.2HG0091320	1	Dof zinc finger protein	Dof zinc finger protein
HORVU.MOREX.r2.2HG0091760	HORVU.MOREX.r2.2HG0091760	1	Protein kinase	Protein kinase
HORVU.MOREX.r2.2HG0092290	HORVU.MOREX.r2.2HG0092290	1	Non-specific serine/threonine protein kinase	Non-specific serine/threonine protein kinase
HORVU.MOREX.r2.4HG0343460	HORVU.MOREX.r2.2HG0092650	0.980055	60S ribosomal protein L21	Ribosomal protein L19
HORVU.MOREX.r2.1HG0031760	HORVU.MOREX.r2.2HG0092650	0.979707	60S ribosomal protein L21	Ribosomal protein L19
HORVU.MOREX.r2.3HG0210540	HORVU.MOREX.r2.2HG0092650	0.85849	Syntaxin related protein	Ribosomal protein L19
HORVU.MOREX.r2.7HG0577670	HORVU.MOREX.r2.2HG0092790	0.952016	30S ribosomal protein S3	60S ribosomal protein L18
HORVU.MOREX.r2.4HG0314500	HORVU.MOREX.r2.2HG0092790	0.974721	Ribosomal protein L19	60S ribosomal protein L18
HORVU.MOREX.r2.6HG0490110	HORVU.MOREX.r2.2HG0092790	0.955078	CCAAT/enhancer-binding protein zeta	60S ribosomal protein L18
HORVU.MOREX.r2.2HG0086170	HORVU.MOREX.r2.2HG0092790	0.972715	40S ribosomal protein S6	60S ribosomal protein L18
HORVU.MOREX.r2.2HG0103970	HORVU.MOREX.r2.2HG0092790	0.856394	30S ribosomal protein S3	60S ribosomal protein L18
HORVU.MOREX.r2.3HG0182650	HORVU.MOREX.r2.2HG0092790	0.968861	50S ribosomal protein L6	60S ribosomal protein L18
HORVU.MOREX.r2.1HG0049050	HORVU.MOREX.r2.2HG0092790	0.965945	Ran-binding protein 1 domain-containing	60S ribosomal protein L18
HORVU.MOREX.r2.5HG0385560	HORVU.MOREX.r2.2HG0092790	0.921886	60S acidic ribosomal protein P0	60S ribosomal protein L18
HORVU.MOREX.r2.1HG0049370	HORVU.MOREX.r2.2HG0092790	0.949363	Importin subunit beta-1	60S ribosomal protein L18
HORVU.MOREX.r2.1HG0003480	HORVU.MOREX.r2.2HG0092790	0.900923	Pumilio-like protein	60S ribosomal protein L18
HORVU.MOREX.r2.2HG0102110	HORVU.MOREX.r2.2HG0092790	0.961169	40S ribosomal protein S6	60S ribosomal protein L18
HORVU.MOREX.r2.1HG0026750	HORVU.MOREX.r2.2HG0092790	0.952062	40S ribosomal protein S3a	60S ribosomal protein L18
HORVU.MOREX.r2.6HG0488990	HORVU.MOREX.r2.2HG0092790	0.988692	60S ribosomal protein L6	60S ribosomal protein L18
HORVU.MOREX.r2.2HG0092650	HORVU.MOREX.r2.2HG0092790	0.960877	Ribosomal protein L19	60S ribosomal protein L18
HORVU.MOREX.r2.5HG0397940	HORVU.MOREX.r2.2HG0092790	0.961015	Ribosome production factor 2-like protein	60S ribosomal protein L18
HORVU.MOREX.r2.4HG0331970	HORVU.MOREX.r2.2HG0092790	0.977829	40S ribosomal protein S3a	60S ribosomal protein L18
HORVU.MOREX.r2.3HG0182620	HORVU.MOREX.r2.2HG0092790	0.969615	50S ribosomal protein L6	60S ribosomal protein L18
HORVU.MOREX.r2.7HG0528960	HORVU.MOREX.r2.2HG0092790	0.963028	50S ribosomal protein L6	60S ribosomal protein L18
HORVU.MOREX.r2.4HG0314300	HORVU.MOREX.r2.2HG0092790	0.958422	Nucleolar GTP-binding protein 2	60S ribosomal protein L18
HORVU.MOREX.r2.1HG0031760	HORVU.MOREX.r2.2HG0092790	0.983623	60S ribosomal protein L21	60S ribosomal protein L18
HORVU.MOREX.r2.3HG0192970	HORVU.MOREX.r2.2HG0092790	0.98628	30S ribosomal protein S7	60S ribosomal protein L18
HORVU.MOREX.r2.1HG0035670	HORVU.MOREX.r2.2HG0092790	0.948936	Nucleolar complex protein 2	60S ribosomal protein L18
HORVU.MOREX.r2.2HG0098990	HORVU.MOREX.r2.2HG0092790	0.948584	Eukaryotic translation initiation factor 6	60S ribosomal protein L18
HORVU.MOREX.r2.2HG0129270	HORVU.MOREX.r2.2HG0092790	0.980868	50S ribosomal protein L13	60S ribosomal protein L18
HORVU.MOREX.r2.2HG0158350	HORVU.MOREX.r2.2HG0092790	0.98037	30S ribosomal protein S17	60S ribosomal protein L18
HORVU.MOREX.r2.4HG0343460	HORVU.MOREX.r2.2HG0092790	0.990002	60S ribosomal protein L21	60S ribosomal protein L18
HORVU.MOREX.r2.3HG0236190	HORVU.MOREX.r2.2HG0092790	0.876446	KRR1 small subunit processome component	60S ribosomal protein L18
HORVU.MOREX.r2.3HG0253280	HORVU.MOREX.r2.2HG0092790	0.849858	zinc finger CCCH domain protein	60S ribosomal protein L18
HORVU.MOREX.r2.2HG0095700	HORVU.MOREX.r2.2HG0092790	0.91405	Ubiquitin carboxyl-terminal hydrolase	60S ribosomal protein L18
HORVU.MOREX.r2.5HG0382390	HORVU.MOREX.r2.2HG0092790	0.781774	Proteasome-associated protein ECM29-like protein	60S ribosomal protein L18
HORVU.MOREX.r2.6HG0492210	HORVU.MOREX.r2.2HG0092790	0.90643	30S ribosomal protein S17	60S ribosomal protein L18
HORVU.MOREX.r2.1HG0068730	HORVU.MOREX.r2.2HG0092990	0.845493	Serine/threonine-protein phosphatase	DNA-directed RNA polymerases I, II, and III subunit rpabc3
HORVU.MOREX.r2.1HG0050550	HORVU.MOREX.r2.2HG0092990	0.872351	DNA-directed RNA polymerase II subunit	DNA-directed RNA polymerases I, II, and III subunit rpabc3
HORVU.MOREX.r2.1HG0020750	HORVU.MOREX.r2.2HG0092990	0.804407	DNA-directed RNA polymerase	DNA-directed RNA polymerases I, II, and III subunit rpabc3
HORVU.MOREX.r2.2HG0171440	HORVU.MOREX.r2.2HG0092990	0.781085	DNA-directed RNA polymerase subunit beta	DNA-directed RNA polymerases I, II, and III subunit rpabc3
HORVU.MOREX.r2.3HG0233390	HORVU.MOREX.r2.2HG0092990	0.834776	Serine/threonine-protein phosphatase	DNA-directed RNA polymerases I, II, and III subunit rpabc3
HORVU.MOREX.r2.4HG0281090	HORVU.MOREX.r2.2HG0093260	0.779862	14-3-3 protein	Universal stress protein
HORVU.MOREX.r2.2HG0093260	HORVU.MOREX.r2.2HG0093260	1	Universal stress protein	Universal stress protein
HORVU.MOREX.r2.2HG0093270	HORVU.MOREX.r2.2HG0093270	1	Universal stress protein	Universal stress protein
HORVU.MOREX.r2.2HG0098990	HORVU.MOREX.r2.2HG0093330	0.879509	Eukaryotic translation initiation factor 6	Ribosomal protein S8e/ribosomal biogenesis NSA2
HORVU.MOREX.r2.2HG0105280	HORVU.MOREX.r2.2HG0093330	0.842895	Ribosome biogenesis protein WDR12 homolog	Ribosomal protein S8e/ribosomal biogenesis NSA2
HORVU.MOREX.r2.1HG0069340	HORVU.MOREX.r2.2HG0093330	0.873686	Guanine nucleotide-binding protein subunit beta-1	Ribosomal protein S8e/ribosomal biogenesis NSA2
HORVU.MOREX.r2.3HG0232920	HORVU.MOREX.r2.2HG0093330	0.837187	Guanine nucleotide-binding protein beta subunit-like protein	Ribosomal protein S8e/ribosomal biogenesis NSA2
HORVU.MOREX.r2.4HG0312690	HORVU.MOREX.r2.2HG0093330	0.87401	Peter Pan-like protein	Ribosomal protein S8e/ribosomal biogenesis NSA2
HORVU.MOREX.r2.2HG0129270	HORVU.MOREX.r2.2HG0093330	0.884114	50S ribosomal protein L13	Ribosomal protein S8e/ribosomal biogenesis NSA2
HORVU.MOREX.r2.5HG0421790	HORVU.MOREX.r2.2HG0093330	0.878745	60S ribosomal protein L5	Ribosomal protein S8e/ribosomal biogenesis NSA2
HORVU.MOREX.r2.2HG0165560	HORVU.MOREX.r2.2HG0093330	0.861365	Protein SDA1-like protein	Ribosomal protein S8e/ribosomal biogenesis NSA2
HORVU.MOREX.r2.6HG0515310	HORVU.MOREX.r2.2HG0093330	0.875937	RRP12-like protein	Ribosomal protein S8e/ribosomal biogenesis NSA2
HORVU.MOREX.r2.2HG0094430	HORVU.MOREX.r2.2HG0093330	0.845695	Nucleolar protein	Ribosomal protein S8e/ribosomal biogenesis NSA2
HORVU.MOREX.r2.7HG0549020	HORVU.MOREX.r2.2HG0093330	0.829693	Nucleolar GTP-binding protein 1	Ribosomal protein S8e/ribosomal biogenesis NSA2
HORVU.MOREX.r2.4HG0314300	HORVU.MOREX.r2.2HG0093330	0.903987	Nucleolar GTP-binding protein 2	Ribosomal protein S8e/ribosomal biogenesis NSA2
HORVU.MOREX.r2.5HG0397940	HORVU.MOREX.r2.2HG0093330	0.870988	Ribosome production factor 2-like protein	Ribosomal protein S8e/ribosomal biogenesis NSA2
HORVU.MOREX.r2.1HG0035670	HORVU.MOREX.r2.2HG0093330	0.905487	Nucleolar complex protein 2	Ribosomal protein S8e/ribosomal biogenesis NSA2
HORVU.MOREX.r2.4HG0291480	HORVU.MOREX.r2.2HG0093330	0.900717	Ribosomal protein L3	Ribosomal protein S8e/ribosomal biogenesis NSA2
HORVU.MOREX.r2.5HG0385560	HORVU.MOREX.r2.2HG0093330	0.776119	60S acidic ribosomal protein P0	Ribosomal protein S8e/ribosomal biogenesis NSA2
HORVU.MOREX.r2.5HG0354740	HORVU.MOREX.r2.2HG0093330	0.926944	60S ribosomal protein L24	Ribosomal protein S8e/ribosomal biogenesis NSA2
HORVU.MOREX.r2.6HG0506700	HORVU.MOREX.r2.2HG0093330	0.786255	Ribosomal RNA small subunit methyltransferase b	Ribosomal protein S8e/ribosomal biogenesis NSA2
HORVU.MOREX.r2.5HG0421920	HORVU.MOREX.r2.2HG0093330	0.937487	Large subunit GTPase 1	Ribosomal protein S8e/ribosomal biogenesis NSA2
HORVU.MOREX.r2.2HG0092790	HORVU.MOREX.r2.2HG0093330	0.895298	60S ribosomal protein L18	Ribosomal protein S8e/ribosomal biogenesis NSA2
HORVU.MOREX.r2.5HG0356540	HORVU.MOREX.r2.2HG0093330	0.841407	Nuclear transcription factor Y subunit	Ribosomal protein S8e/ribosomal biogenesis NSA2
HORVU.MOREX.r2.2HG0093330	HORVU.MOREX.r2.2HG0093330	1	Ribosomal protein S8e/ribosomal biogenesis NSA2	Ribosomal protein S8e/ribosomal biogenesis NSA2
HORVU.MOREX.r2.2HG0093450	HORVU.MOREX.r2.2HG0093450	1	Protein arginine methyltransferase	Protein arginine methyltransferase
HORVU.MOREX.r2.2HG0105280	HORVU.MOREX.r2.2HG0093470	0.864722	Ribosome biogenesis protein WDR12 homolog	60S ribosome subunit biogenesis protein NIP7 homolog
HORVU.MOREX.r2.1HG0003480	HORVU.MOREX.r2.2HG0093470	0.843983	Pumilio-like protein	60S ribosome subunit biogenesis protein NIP7 homolog
HORVU.MOREX.r2.5HG0397940	HORVU.MOREX.r2.2HG0093470	0.833981	Ribosome production factor 2-like protein	60S ribosome subunit biogenesis protein NIP7 homolog
HORVU.MOREX.r2.1HG0011220	HORVU.MOREX.r2.2HG0093470	0.803327	Polyribonucleotide nucleotidyltransferase	60S ribosome subunit biogenesis protein NIP7 homolog
HORVU.MOREX.r2.5HG0439890	HORVU.MOREX.r2.2HG0093470	0.86421	Pumilio	60S ribosome subunit biogenesis protein NIP7 homolog
HORVU.MOREX.r2.6HG0490110	HORVU.MOREX.r2.2HG0093470	0.873867	CCAAT/enhancer-binding protein zeta	60S ribosome subunit biogenesis protein NIP7 homolog
HORVU.MOREX.r2.2HG0095700	HORVU.MOREX.r2.2HG0093470	0.847235	Ubiquitin carboxyl-terminal hydrolase	60S ribosome subunit biogenesis protein NIP7 homolog
HORVU.MOREX.r2.5HG0356470	HORVU.MOREX.r2.2HG0093470	0.841785	Transducin/WD40 repeat protein	60S ribosome subunit biogenesis protein NIP7 homolog
HORVU.MOREX.r2.4HG0279970	HORVU.MOREX.r2.2HG0093470	0.829421	Pescadillo homolog	60S ribosome subunit biogenesis protein NIP7 homolog
HORVU.MOREX.r2.1HG0035670	HORVU.MOREX.r2.2HG0093470	0.817151	Nucleolar complex protein 2	60S ribosome subunit biogenesis protein NIP7 homolog
HORVU.MOREX.r2.4HG0312690	HORVU.MOREX.r2.2HG0093470	0.84519	Peter Pan-like protein	60S ribosome subunit biogenesis protein NIP7 homolog
HORVU.MOREX.r2.2HG0093330	HORVU.MOREX.r2.2HG0093470	0.769693	Ribosomal protein S8e/ribosomal biogenesis NSA2	60S ribosome subunit biogenesis protein NIP7 homolog
HORVU.MOREX.r2.2HG0173950	HORVU.MOREX.r2.2HG0093640	0.945424	Bystin	40S ribosomal protein S21
HORVU.MOREX.r2.2HG0129270	HORVU.MOREX.r2.2HG0093640	0.877964	50S ribosomal protein L13	40S ribosomal protein S21
HORVU.MOREX.r2.4HG0337610	HORVU.MOREX.r2.2HG0093640	0.936394	40S ribosomal protein SA	40S ribosomal protein S21
HORVU.MOREX.r2.3HG0256170	HORVU.MOREX.r2.2HG0093640	0.953462	Protein serine/threonine kinase	40S ribosomal protein S21
HORVU.MOREX.r2.3HG0236190	HORVU.MOREX.r2.2HG0093640	0.868212	KRR1 small subunit processome component	40S ribosomal protein S21
HORVU.MOREX.r2.3HG0253280	HORVU.MOREX.r2.2HG0093640	0.943787	zinc finger CCCH domain protein	40S ribosomal protein S21
HORVU.MOREX.r2.2HG0171360	HORVU.MOREX.r2.2HG0093610	0.799988	Protein vip1	GH3 family protein
HORVU.MOREX.r2.2HG0093860	HORVU.MOREX.r2.2HG0093860	1	Two-component response regulator	Two-component response regulator
HORVU.MOREX.r2.2HG0093910	HORVU.MOREX.r2.2HG0093910	1	Potassium transporter	Potassium transporter
HORVU.MOREX.r2.7HG0617550	HORVU.MOREX.r2.2HG0093980	0.827429	Transcription initiation factor TFIID subunit 1	DNA polymerase
HORVU.MOREX.r2.1HG0069590	HORVU.MOREX.r2.2HG0094430	0.959597	Nucleolar family protein	Nucleolar protein
HORVU.MOREX.r2.6HG0458830	HORVU.MOREX.r2.2HG0094430	0.895197	Ribose-phosphate pyrophosphokinase family protein	Nucleolar protein
HORVU.MOREX.r2.1HG0000700	HORVU.MOREX.r2.2HG0094430	0.859924	Transcription initiation factor TFIID subunit 6	Nucleolar protein
HORVU.MOREX.r2.2HG0094430	HORVU.MOREX.r2.2HG0094430	1	Nucleolar protein	Nucleolar protein
HORVU.MOREX.r2.7HG0549020	HORVU.MOREX.r2.2HG0094430	0.938728	Nucleolar GTP-binding protein 1	Nucleolar protein
HORVU.MOREX.r2.2HG0095540	HORVU.MOREX.r2.2HG0094430	0.979785	Nucleolar family protein	Nucleolar protein
HORVU.MOREX.r2.2HG0095510	HORVU.MOREX.r2.2HG0094430	0.941064	Nucleolar family protein	Nucleolar protein
HORVU.MOREX.r2.1HG0003480	HORVU.MOREX.r2.2HG0094430	0.921711	Pumilio-like protein	Nucleolar protein
HORVU.MOREX.r2.3HG0210540	HORVU.MOREX.r2.2HG0094430	0.768864	Syntaxin related protein	Nucleolar protein
HORVU.MOREX.r2.5HG0356470	HORVU.MOREX.r2.2HG0094430	0.979095	Transducin/WD40 repeat protein	Nucleolar protein
HORVU.MOREX.r2.5HG0425890	HORVU.MOREX.r2.2HG0094430	0.93928	Protein kinase	Nucleolar protein
HORVU.MOREX.r2.5HG0397940	HORVU.MOREX.r2.2HG0094430	0.972583	Ribosome production factor 2-like protein	Nucleolar protein
HORVU.MOREX.r2.3HG0191640	HORVU.MOREX.r2.2HG0094830	0.839509	Membrane protein insertase YidC	Membrane-associated 30 kDa, chloroplastic
HORVU.MOREX.r2.3HG0210540	HORVU.MOREX.r2.2HG0095510	0.826424	Syntaxin related protein	Nucleolar family protein
HORVU.MOREX.r2.4HG0284310	HORVU.MOREX.r2.2HG0095510	0.838678	Cyclin-like protein	Nucleolar family protein
HORVU.MOREX.r2.4HG0284310	HORVU.MOREX.r2.2HG0095540	0.853666	Cyclin-like protein	Nucleolar family protein
HORVU.MOREX.r2.3HG0210540	HORVU.MOREX.r2.2HG0095540	0.822385	Syntaxin related protein	Nucleolar family protein
HORVU.MOREX.r2.5HG0445080	HORVU.MOREX.r2.2HG0095700	0.843258	U2 small nuclear ribonucleoprotein A	Ubiquitin carboxyl-terminal hydrolase
HORVU.MOREX.r2.2HG0129270	HORVU.MOREX.r2.2HG0095700	0.907629	50S ribosomal protein L13	Ubiquitin carboxyl-terminal hydrolase
HORVU.MOREX.r2.2HG0116140	HORVU.MOREX.r2.2HG0095700	0.949418	RNA-binding family protein	Ubiquitin carboxyl-terminal hydrolase
HORVU.MOREX.r2.2HG0095700	HORVU.MOREX.r2.2HG0095700	1	Ubiquitin carboxyl-terminal hydrolase	Ubiquitin carboxyl-terminal hydrolase
HORVU.MOREX.r2.2HG0094430	HORVU.MOREX.r2.2HG0095700	0.916348	Nucleolar protein	Ubiquitin carboxyl-terminal hydrolase
HORVU.MOREX.r2.7HG0534430	HORVU.MOREX.r2.2HG0095710	0.829113	LMBR1-like membrane protein	Phospho-N-acetylmuramoyl-pentapeptide-transferase
HORVU.MOREX.r2.2HG0083720	HORVU.MOREX.r2.2HG0095710	0.809383	Sugar transporter, putative	Phospho-N-acetylmuramoyl-pentapeptide-transferase
HORVU.MOREX.r2.7HG0593030	HORVU.MOREX.r2.2HG0095710	0.938011	UDP-galactose transporter, putative	Phospho-N-acetylmuramoyl-pentapeptide-transferase
HORVU.MOREX.r2.1HG0021470	HORVU.MOREX.r2.2HG0095710	0.787352	RING/U-box superfamily protein	Phospho-N-acetylmuramoyl-pentapeptide-transferase
HORVU.MOREX.r2.2HG0095710	HORVU.MOREX.r2.2HG0095710	1	Phospho-N-acetylmuramoyl-pentapeptide-transferase	Phospho-N-acetylmuramoyl-pentapeptide-transferase
HORVU.MOREX.r2.5HG0434680	HORVU.MOREX.r2.2HG0095710	0.774252	Cellulose synthase	Phospho-N-acetylmuramoyl-pentapeptide-transferase
HORVU.MOREX.r2.7HG0583590	HORVU.MOREX.r2.2HG0095710	0.784323	Amino acid transporter, putative	Phospho-N-acetylmuramoyl-pentapeptide-transferase
HORVU.MOREX.r2.4HG0327430	HORVU.MOREX.r2.2HG0095710	0.86194	Transmembrane 9 superfamily member	Phospho-N-acetylmuramoyl-pentapeptide-transferase
[truncated: 8,694 more rows]

## Sheet: GO enrichment HvInt-R
ID	Description	GeneRatio	BgRatio	pvalue	p.adjust	qvalue	geneID	Count	GO_definition	GO_ontology	GO_term	group
GO:0004743	Pyruvate kinase	4/408	16/32782	3.82221e-05	0.00146336	0.00129323	HORVU.MOREX.r2.5HG0380250/HORVU.MOREX.r2.2HG0123640/HORVU.MOREX.r2.2HG0174570/HORVU.MOREX.r2.3HG0213560	4	Catalysis of the reaction: = ADP + H(+) + phosphoenolpyruvate => ATP + pyruvate.	MF	pyruvate kinase activity	R_cluster13
GO:0004970	Glutamate receptor	4/408	41/32782	0.00166409	0.0371648	0.032844	HORVU.MOREX.r2.7HG0608910/HORVU.MOREX.r2.2HG0115500/HORVU.MOREX.r2.5HG0399400/HORVU.MOREX.r2.2HG0162870	4	Catalysis of the transmembrane transfer of an ion by a channel that opens when glutamate has been bound by the channel complex or one of its constituent parts.	MF	ionotropic glutamate receptor activity	R_cluster13
GO:0005215	Sugar transporter, putative	17/408	201/32782	7.3538e-10	6.5694e-08	5.80563e-08	HORVU.MOREX.r2.2HG0083720/HORVU.MOREX.r2.2HG0111520/HORVU.MOREX.r2.3HG0264820/HORVU.MOREX.r2.7HG0578670/HORVU.MOREX.r2.2HG0117650/HORVU.MOREX.r2.5HG0404270/HORVU.MOREX.r2.6HG0513820/HORVU.MOREX.r2.1HG0042180/HORVU.MOREX.r2.6HG0501730/HORVU.MOREX.r2.2HG0148310/HORVU.MOREX.r2.4HG0343650/HORVU.MOREX.r2.5HG0404230/HORVU.MOREX.r2.2HG0163220/HORVU.MOREX.r2.2HG0108210/HORVU.MOREX.r2.1HG0075630/HORVU.MOR…	17	Enables the directed movement of substances (such as macromolecules, small molecules, ions) into, out of or within a cell, or between cells.	MF	transporter activity	R_cluster13
GO:0005783	transmembrane protein, putative (DUF247)	11/408	313/32782	0.00203875	0.0390276	0.0344902	HORVU.MOREX.r2.5HG0445510/HORVU.MOREX.r2.7HG0530900/HORVU.MOREX.r2.6HG0508670/HORVU.MOREX.r2.1HG0023650/HORVU.MOREX.r2.3HG0220590/HORVU.MOREX.r2.2HG0177030/HORVU.MOREX.r2.4HG0296290/HORVU.MOREX.r2.1HG0048790/HORVU.MOREX.r2.1HG0056600/HORVU.MOREX.r2.1HG0069830/HORVU.MOREX.r2.7HG0586440	11	The irregular network of unit membranes, visible only by electron microscopy, that occurs in the cytoplasm of many eukaryotic cells. The membranes form a complex meshwork of tubular channels, which are often expanded into slitlike cavities called cisternae. The ER takes two forms, rough (or granular), with ribosomes adhering to the outer surface, and smooth (with no ribosomes attached).	CC	endoplasmic reticulum	R_cluster13
GO:0006004	O-fucosyltransferase family protein	4/408	32/32782	0.000645275	0.0157212	0.0138935	HORVU.MOREX.r2.4HG0335750/HORVU.MOREX.r2.6HG0467990/HORVU.MOREX.r2.7HG0551500/HORVU.MOREX.r2.7HG0606840	4	The chemical reactions and pathways involving fucose, or 6-deoxygalactose, which has two enantiomers, D-fucose and L-fucose.	BP	fucose metabolic process	R_cluster13
GO:0006811	V-type proton ATPase proteolipid subunit	17/408	420/32782	2.47508e-05	0.00110553	0.000977004	HORVU.MOREX.r2.7HG0557110/HORVU.MOREX.r2.2HG0171110/HORVU.MOREX.r2.2HG0117130/HORVU.MOREX.r2.5HG0387370/HORVU.MOREX.r2.7HG0587840/HORVU.MOREX.r2.7HG0608910/HORVU.MOREX.r2.5HG0424570/HORVU.MOREX.r2.2HG0115500/HORVU.MOREX.r2.2HG0094680/HORVU.MOREX.r2.5HG0399400/HORVU.MOREX.r2.2HG0162870/HORVU.MOREX.r2.5HG0408620/HORVU.MOREX.r2.4HG0279780/HORVU.MOREX.r2.4HG0277550/HORVU.MOREX.r2.4HG0303230/HORVU.MOR…	17	The directed movement of charged atoms or small charged molecules into, out of or within a cell, or between cells, by means of some agent such as a transporter or pore.	BP	ion transport	R_cluster13
GO:0006855	Protein DETOXIFICATION	7/408	86/32782	0.000101428	0.0030203	0.00266916	HORVU.MOREX.r2.2HG0110730/HORVU.MOREX.r2.4HG0295800/HORVU.MOREX.r2.2HG0129090/HORVU.MOREX.r2.2HG0116210/HORVU.MOREX.r2.6HG0456210/HORVU.MOREX.r2.4HG0328220/HORVU.MOREX.r2.6HG0500330	7	The process in which a drug is transported across a membrane.	BP	drug transmembrane transport	R_cluster13
GO:0008643	WRKY family transcription factor family protein	16/408	120/32782	2.36296e-12	6.33273e-10	5.59649e-10	HORVU.MOREX.r2.2HG0083720/HORVU.MOREX.r2.2HG0111520/HORVU.MOREX.r2.3HG0264820/HORVU.MOREX.r2.5HG0355760/HORVU.MOREX.r2.6HG0491780/HORVU.MOREX.r2.7HG0578670/HORVU.MOREX.r2.6HG0513820/HORVU.MOREX.r2.1HG0055660/HORVU.MOREX.r2.6HG0521400/HORVU.MOREX.r2.7HG0546820/HORVU.MOREX.r2.1HG0042180/HORVU.MOREX.r2.4HG0343650/HORVU.MOREX.r2.1HG0025160/HORVU.MOREX.r2.1HG0075630/HORVU.MOREX.r2.3HG0195710/HORVU.MOR…	16	The directed movement of carbohydrate into, out of or within a cell, or between cells, by means of some agent such as a transporter or pore. Carbohydrates are any of a group of organic compounds based of the general formula Cx(H2O)y.	BP	carbohydrate transport	R_cluster13
GO:0015238	Protein DETOXIFICATION	7/408	86/32782	0.000101428	0.0030203	0.00266916	HORVU.MOREX.r2.2HG0110730/HORVU.MOREX.r2.4HG0295800/HORVU.MOREX.r2.2HG0129090/HORVU.MOREX.r2.2HG0116210/HORVU.MOREX.r2.6HG0456210/HORVU.MOREX.r2.4HG0328220/HORVU.MOREX.r2.6HG0500330	7	NA	NA	NA	R_cluster13
GO:0015297	Protein DETOXIFICATION	9/408	113/32782	1.2526e-05	0.000671392	0.000593336	HORVU.MOREX.r2.2HG0110730/HORVU.MOREX.r2.4HG0295800/HORVU.MOREX.r2.2HG0129090/HORVU.MOREX.r2.2HG0116210/HORVU.MOREX.r2.6HG0456210/HORVU.MOREX.r2.4HG0328220/HORVU.MOREX.r2.2HG0094680/HORVU.MOREX.r2.4HG0303230/HORVU.MOREX.r2.6HG0500330	9	Enables the active transport of a solute across a membrane by a mechanism whereby two or more species are transported in opposite directions in a tightly coupled process not directly linked to a form of energy other than chemiosmotic energy. The reaction is: solute A(out) + solute B(in) = solute A(in) + solute B(out).	MF	antiporter activity	R_cluster13
GO:0022857	WAT1-related protein	25/408	405/32782	7.1024e-11	9.51722e-09	8.41074e-09	HORVU.MOREX.r2.2HG0083720/HORVU.MOREX.r2.2HG0111520/HORVU.MOREX.r2.3HG0264820/HORVU.MOREX.r2.3HG0200760/HORVU.MOREX.r2.4HG0279230/HORVU.MOREX.r2.7HG0529000/HORVU.MOREX.r2.7HG0578670/HORVU.MOREX.r2.6HG0503490/HORVU.MOREX.r2.6HG0513820/HORVU.MOREX.r2.7HG0602080/HORVU.MOREX.r2.7HG0537760/HORVU.MOREX.r2.6HG0449580/HORVU.MOREX.r2.1HG0042180/HORVU.MOREX.r2.4HG0343650/HORVU.MOREX.r2.5HG0422250/HORVU.MOR…	25	Enables the transfer of a substance, usually a specific substance or a group of related substances, from one side of a membrane to the other.	MF	transmembrane transporter activity	R_cluster13
GO:0030955	Pyruvate kinase	4/408	21/32782	0.000119649	0.0032066	0.0028338	HORVU.MOREX.r2.5HG0380250/HORVU.MOREX.r2.2HG0123640/HORVU.MOREX.r2.2HG0174570/HORVU.MOREX.r2.3HG0213560	4	Interacting selectively and non-covalently with potassium (K+) ions.	MF	potassium ion binding	R_cluster13
GO:0032440	Receptor protein kinase, putative	12/408	185/32782	3.96476e-06	0.000265639	0.000234755	HORVU.MOREX.r2.2HG0083720/HORVU.MOREX.r2.2HG0111520/HORVU.MOREX.r2.3HG0264820/HORVU.MOREX.r2.3HG0194360/HORVU.MOREX.r2.7HG0578670/HORVU.MOREX.r2.5HG0350720/HORVU.MOREX.r2.2HG0152550/HORVU.MOREX.r2.1HG0042180/HORVU.MOREX.r2.4HG0343650/HORVU.MOREX.r2.3HG0195710/HORVU.MOREX.r2.5HG0350510/HORVU.MOREX.r2.7HG0538290	12	Catalysis of the reaction: n-alkanal + NAD(P)+ = alk-2-enal + NAD(P)H + H+.	MF	2-alkenal reductase [NAD(P)+] activity	R_cluster13
GO:0035235	Glutamate receptor	4/408	42/32782	0.0018214	0.0375489	0.0331834	HORVU.MOREX.r2.7HG0608910/HORVU.MOREX.r2.2HG0115500/HORVU.MOREX.r2.5HG0399400/HORVU.MOREX.r2.2HG0162870	4	A series of molecular signals initiated by glutamate binding to a glutamate receptor on the surface of the target cell, followed by the movement of ions through a channel in the receptor complex. Ends with regulation of a downstream cellular process, e.g. transcription.	BP	ionotropic glutamate receptor signaling pathway	R_cluster13
GO:0000139	Guanine nucleotide-binding protein G(k) subunit alpha	11/390	183/32782	1.34556e-05	0.000401747	0.000319698	HORVU.MOREX.r2.5HG0369400/HORVU.MOREX.r2.5HG0403270/HORVU.MOREX.r2.4HG0309820/HORVU.MOREX.r2.4HG0281140/HORVU.MOREX.r2.7HG0538650/HORVU.MOREX.r2.1HG0019680/HORVU.MOREX.r2.1HG0034210/HORVU.MOREX.r2.3HG0253370/HORVU.MOREX.r2.5HG0400820/HORVU.MOREX.r2.1HG0010520/HORVU.MOREX.r2.3HG0259610	11	The lipid bilayer surrounding any of the compartments of the Golgi apparatus.	CC	Golgi membrane	R_cluster3
GO:0003924	Ras-like protein	12/390	307/32782	0.000347102	0.00580355	0.00461828	HORVU.MOREX.r2.1HG0070320/HORVU.MOREX.r2.2HG0119140/HORVU.MOREX.r2.3HG0221540/HORVU.MOREX.r2.5HG0392470/HORVU.MOREX.r2.5HG0435600/HORVU.MOREX.r2.4HG0281440/HORVU.MOREX.r2.6HG0511000/HORVU.MOREX.r2.7HG0554850/HORVU.MOREX.r2.5HG0442930/HORVU.MOREX.r2.5HG0413330/HORVU.MOREX.r2.5HG0440080/HORVU.MOREX.r2.7HG0598420	12	Catalysis of the reaction: GTP + H2O = GDP + phosphate.	MF	GTPase activity	R_cluster3
GO:0004742	Acetyltransferase component of pyruvate dehydrogenase complex	4/390	10/32782	3.91446e-06	0.000148749	0.00011837	HORVU.MOREX.r2.7HG0528240/HORVU.MOREX.r2.6HG0450620/HORVU.MOREX.r2.4HG0284770/HORVU.MOREX.r2.7HG0581720	4	Catalysis of the reaction: acetyl-CoA + dihydrolipoamide = CoA + S-acetyldihydrolipoamide.	MF	dihydrolipoyllysine-residue acetyltransferase activity	R_cluster3
GO:0005484	Vesicle transport V-SNARE protein	8/390	31/32782	2.32018e-09	1.61639e-07	1.28627e-07	HORVU.MOREX.r2.3HG0198600/HORVU.MOREX.r2.7HG0532700/HORVU.MOREX.r2.1HG0065550/HORVU.MOREX.r2.5HG0429640/HORVU.MOREX.r2.5HG0369800/HORVU.MOREX.r2.2HG0123500/HORVU.MOREX.r2.5HG0430010/HORVU.MOREX.r2.3HG0235390	8	Acting as a marker to identify a membrane and interacting selectively with one or more SNAREs on another membrane to mediate membrane fusion.	MF	SNAP receptor activity	R_cluster3
GO:0005525	Ras-like protein	13/390	418/32782	0.00165529	0.0192198	0.0152945	HORVU.MOREX.r2.1HG0070320/HORVU.MOREX.r2.2HG0119140/HORVU.MOREX.r2.3HG0221540/HORVU.MOREX.r2.5HG0392470/HORVU.MOREX.r2.5HG0435600/HORVU.MOREX.r2.4HG0281440/HORVU.MOREX.r2.6HG0511000/HORVU.MOREX.r2.7HG0554850/HORVU.MOREX.r2.5HG0442930/HORVU.MOREX.r2.1HG0073710/HORVU.MOREX.r2.5HG0413330/HORVU.MOREX.r2.5HG0440080/HORVU.MOREX.r2.7HG0598420	13	Interacting selectively and non-covalently with GTP, guanosine triphosphate.	MF	GTP binding	R_cluster3
GO:0005741	Fission 1 protein	4/390	27/32782	0.000278751	0.00506599	0.00403136	HORVU.MOREX.r2.4HG0331780/HORVU.MOREX.r2.1HG0066370/HORVU.MOREX.r2.3HG0236330/HORVU.MOREX.r2.5HG0435600	4	The outer, i.e. cytoplasm-facing, lipid bilayer of the mitochondrial envelope.	CC	mitochondrial outer membrane	R_cluster3
GO:0005759	F-box family protein	7/390	73/32782	2.65198e-05	0.00073902	0.000588089	HORVU.MOREX.r2.5HG0377370/HORVU.MOREX.r2.6HG0511170/HORVU.MOREX.r2.7HG0528240/HORVU.MOREX.r2.6HG0450620/HORVU.MOREX.r2.4HG0284770/HORVU.MOREX.r2.5HG0390370/HORVU.MOREX.r2.7HG0581720	7	The gel-like material, with considerable fine structure, that lies in the matrix space, or lumen, of a mitochondrion. It contains the enzymes of the tricarboxylic acid cycle and, in some organisms, the enzymes concerned with fatty acid oxidation.	CC	mitochondrial matrix	R_cluster3
GO:0005783	transmembrane protein, putative (DUF247)	11/390	313/32782	0.00143258	0.0171091	0.0136149	HORVU.MOREX.r2.7HG0602800/HORVU.MOREX.r2.2HG0098530/HORVU.MOREX.r2.3HG0262260/HORVU.MOREX.r2.3HG0206170/HORVU.MOREX.r2.3HG0221540/HORVU.MOREX.r2.4HG0342100/HORVU.MOREX.r2.3HG0257800/HORVU.MOREX.r2.1HG0061210/HORVU.MOREX.r2.2HG0176780/HORVU.MOREX.r2.6HG0461570/HORVU.MOREX.r2.6HG0461610	11	The irregular network of unit membranes, visible only by electron microscopy, that occurs in the cytoplasm of many eukaryotic cells. The membranes form a complex meshwork of tubular channels, which are often expanded into slitlike cavities called cisternae. The ER takes two forms, rough (or granular), with ribosomes adhering to the outer surface, and smooth (with no ribosomes attached).	CC	endoplasmic reticulum	R_cluster3
GO:0005789	Guanine nucleotide-binding protein G(k) subunit alpha	8/390	212/32782	0.00405734	0.0413651	0.0329171	HORVU.MOREX.r2.7HG0602800/HORVU.MOREX.r2.2HG0152570/HORVU.MOREX.r2.3HG0206170/HORVU.MOREX.r2.3HG0221540/HORVU.MOREX.r2.4HG0342100/HORVU.MOREX.r2.2HG0111680/HORVU.MOREX.r2.7HG0580400/HORVU.MOREX.r2.7HG0598590	8	The lipid bilayer surrounding the endoplasmic reticulum.	CC	endoplasmic reticulum membrane	R_cluster3
GO:0005794	Guanine nucleotide-binding protein G(k) subunit alpha	20/390	346/32782	8.25657e-09	4.93035e-07	3.92342e-07	HORVU.MOREX.r2.7HG0602800/HORVU.MOREX.r2.5HG0369400/HORVU.MOREX.r2.6HG0520780/HORVU.MOREX.r2.4HG0343940/HORVU.MOREX.r2.6HG0520300/HORVU.MOREX.r2.7HG0544420/HORVU.MOREX.r2.1HG0065550/HORVU.MOREX.r2.4HG0281100/HORVU.MOREX.r2.2HG0098530/HORVU.MOREX.r2.4HG0281140/HORVU.MOREX.r2.7HG0538650/HORVU.MOREX.r2.3HG0235390/HORVU.MOREX.r2.1HG0019680/HORVU.MOREX.r2.1HG0034210/HORVU.MOREX.r2.3HG0253370/HORVU.MOR…	20	A compound membranous cytoplasmic organelle of eukaryotic cells, consisting of flattened, ribosome-free vesicles arranged in a more or less regular stack. The Golgi apparatus differs from the endoplasmic reticulum in often having slightly thicker membranes, appearing in sections as a characteristic shallow semicircle so that the convex side (cis or entry face) abuts the endoplasmic reticulum, sec…	CC	Golgi apparatus	R_cluster3
GO:0005905	Pentatricopeptide repeat-containing protein	3/390	14/32782	0.000551714	0.00795229	0.00632819	HORVU.MOREX.r2.4HG0347860/HORVU.MOREX.r2.5HG0385600/HORVU.MOREX.r2.4HG0295930	3	A part of the endomembrane system in the form of an invagination of a membrane upon which a clathrin coat forms, and that can be converted by vesicle budding into a clathrin-coated vesicle. Coated pits form on the plasma membrane, where they are involved in receptor-mediated selective transport of many proteins and other macromolecules across the cell membrane, in the trans-Golgi network, and on …	CC	clathrin-coated pit	R_cluster3
GO:0006006	Glyceraldehyde-3-phosphate dehydrogenase	3/390	28/32782	0.00438967	0.0426717	0.0339568	HORVU.MOREX.r2.6HG0490690/HORVU.MOREX.r2.4HG0342010/HORVU.MOREX.r2.2HG0143170	3	The chemical reactions and pathways involving glucose, the aldohexose gluco-hexose. D-glucose is dextrorotatory and is sometimes known as dextrose; it is an important source of energy for living organisms and is found free as well as combined in homo- and hetero-oligosaccharides and polysaccharides.	BP	glucose metabolic process	R_cluster3
GO:0006090	Pyruvate, phosphate dikinase	4/390	11/32782	6.09347e-06	0.000212256	0.000168907	HORVU.MOREX.r2.7HG0528240/HORVU.MOREX.r2.6HG0450620/HORVU.MOREX.r2.4HG0284770/HORVU.MOREX.r2.7HG0581720	4	The chemical reactions and pathways involving pyruvate, 2-oxopropanoate.	BP	pyruvate metabolic process	R_cluster3
GO:0006096	Glucose-6-phosphate isomerase	7/390	130/32782	0.000965226	0.0122262	0.00972924	HORVU.MOREX.r2.6HG0505220/HORVU.MOREX.r2.3HG0254340/HORVU.MOREX.r2.3HG0254350/HORVU.MOREX.r2.6HG0474240/HORVU.MOREX.r2.1HG0055260/HORVU.MOREX.r2.5HG0350790/HORVU.MOREX.r2.7HG0554840	7	The chemical reactions and pathways resulting in the breakdown of a carbohydrate into pyruvate, with the concomitant production of a small amount of ATP and the reduction of NAD(P) to NAD(P)H. Glycolysis begins with the metabolism of a carbohydrate to generate products that can enter the pathway and ends with the production of pyruvate. Pyruvate may be converted to acetyl-coenzyme A, ethanol, lac…	BP	glycolytic process	R_cluster3
GO:0006779	Glutamyl-tRNA reductase	5/390	45/32782	0.000191907	0.00407512	0.00324286	HORVU.MOREX.r2.4HG0314380/HORVU.MOREX.r2.3HG0226460/HORVU.MOREX.r2.2HG0158780/HORVU.MOREX.r2.7HG0549780/HORVU.MOREX.r2.6HG0490630	5	The chemical reactions and pathways resulting in the formation of any member of a large group of derivatives or analogs of porphyrin. Porphyrin consists of a ring of four pyrrole nuclei linked each to the next at their alpha positions through a methine group.	BP	porphyrin-containing compound biosynthetic process	R_cluster3
GO:0006782	Glutamyl-tRNA reductase	5/390	24/32782	8.19506e-06	0.000263503	0.000209687	HORVU.MOREX.r2.4HG0314380/HORVU.MOREX.r2.3HG0226460/HORVU.MOREX.r2.2HG0158780/HORVU.MOREX.r2.7HG0549780/HORVU.MOREX.r2.6HG0490630	5	The chemical reactions and pathways resulting in the formation of protoporphyrinogen IX.	BP	protoporphyrinogen IX biosynthetic process	R_cluster3
GO:0006886	Transforming growth factor-beta receptor-associated protein 1	29/390	205/32782	1.26073e-22	2.63492e-20	2.09679e-20	HORVU.MOREX.r2.3HG0198600/HORVU.MOREX.r2.6HG0501850/HORVU.MOREX.r2.5HG0428870/HORVU.MOREX.r2.7HG0532700/HORVU.MOREX.r2.4HG0312080/HORVU.MOREX.r2.4HG0347860/HORVU.MOREX.r2.6HG0520300/HORVU.MOREX.r2.7HG0544420/HORVU.MOREX.r2.1HG0065550/HORVU.MOREX.r2.5HG0385600/HORVU.MOREX.r2.4HG0295930/HORVU.MOREX.r2.5HG0403270/HORVU.MOREX.r2.4HG0309820/HORVU.MOREX.r2.5HG0429640/HORVU.MOREX.r2.5HG0369800/HORVU.MOR…	29	The directed movement of proteins in a cell, including the movement of proteins between specific compartments or structures within a cell, such as organelles of a eukaryotic cell.	BP	intracellular protein transport	R_cluster3
GO:0006888	Retrovirus-related Pol polyprotein from transposon TNT 1-94	6/390	56/32782	5.36193e-05	0.0014008	0.00111472	HORVU.MOREX.r2.5HG0403270/HORVU.MOREX.r2.4HG0309820/HORVU.MOREX.r2.2HG0079930/HORVU.MOREX.r2.5HG0400820/HORVU.MOREX.r2.2HG0148380/HORVU.MOREX.r2.4HG0288510	6	The directed movement of substances from the endoplasmic reticulum (ER) to the Golgi, mediated by COP II vesicles. Small COP II coated vesicles form from the ER and then fuse directly with the cis-Golgi. Larger structures are transported along microtubules to the cis-Golgi.	BP	endoplasmic reticulum to Golgi vesicle-mediated transport	R_cluster3
GO:0007030	Protein transport Sec24-like protein	3/390	10/32782	0.000188438	0.00407512	0.00324286	HORVU.MOREX.r2.5HG0444090/HORVU.MOREX.r2.2HG0079930/HORVU.MOREX.r2.7HG0611300	3	A process that is carried out at the cellular level which results in the assembly, arrangement of constituent parts, or disassembly of the Golgi apparatus.	BP	Golgi organization	R_cluster3
GO:0009055	Cytochrome b	10/390	297/32782	0.00315732	0.032994	0.0262556	HORVU.MOREX.r2.1HG0019760/HORVU.MOREX.r2.1HG0052160/HORVU.MOREX.r2.1HG0011090/HORVU.MOREX.r2.1HG0042190/HORVU.MOREX.r2.7HG0572100/HORVU.MOREX.r2.2HG0137070/HORVU.MOREX.r2.3HG0253360/HORVU.MOREX.r2.4HG0281460/HORVU.MOREX.r2.7HG0586250/HORVU.MOREX.r2.7HG0586260	10	Any molecular entity that serves as an electron acceptor and electron donor in an electron transport chain. An electron transport chain is a process in which a series of electron carriers operate together to transfer electrons from donors to any of several different terminal electron acceptors to generate a transmembrane electrochemical gradient.	MF	electron transfer activity	R_cluster3
GO:0009085	Succinyl-diaminopimelate desuccinylase	3/390	16/32782	0.000833924	0.0108931	0.00866842	HORVU.MOREX.r2.7HG0540790/HORVU.MOREX.r2.2HG0098330/HORVU.MOREX.r2.6HG0484190	3	The chemical reactions and pathways resulting in the formation of lysine, 2,6-diaminohexanoic acid.	BP	lysine biosynthetic process	R_cluster3
GO:0009089	4-hydroxy-tetrahydrodipicolinate reductase	4/390	33/32782	0.000614399	0.00856062	0.00681228	HORVU.MOREX.r2.7HG0540790/HORVU.MOREX.r2.2HG0098330/HORVU.MOREX.r2.6HG0484190/HORVU.MOREX.r2.5HG0425630	4	The chemical reactions and pathways resulting in the formation of lysine, via the intermediate diaminopimelate.	BP	lysine biosynthetic process via diaminopimelate	R_cluster3
GO:0009505	Beta-hexosaminidase	3/390	22/32782	0.00217517	0.0239268	0.0190402	HORVU.MOREX.r2.7HG0602800/HORVU.MOREX.r2.3HG0257800/HORVU.MOREX.r2.5HG0404500	3	A more or less rigid stucture lying outside the cell membrane of a cell and composed of cellulose and pectin and other organic and inorganic substances.	CC	plant-type cell wall	R_cluster3
GO:0009853	Ribulose bisphosphate carboxylase small chain	4/390	23/32782	0.00014603	0.00359062	0.00285731	HORVU.MOREX.r2.1HG0029020/HORVU.MOREX.r2.2HG0085980/HORVU.MOREX.r2.2HG0086010/HORVU.MOREX.r2.2HG0086020	4	A light-dependent catabolic process occurring concomitantly with photosynthesis in plants (especially C3 plants) whereby dioxygen (O2) is consumed and carbon dioxide (CO2) is evolved. The substrate is glycolate formed in large quantities in chloroplasts from 2-phosphoglycolate generated from ribulose 1,5-bisphosphate by the action of ribulose-bisphosphate carboxylase; the glycolate enters the per…	BP	photorespiration	R_cluster3
GO:0015031	Mitochondrial import inner membrane translocase subunit Tim9	23/390	319/32782	7.64488e-12	1.06519e-09	8.47643e-10	HORVU.MOREX.r2.6HG0501850/HORVU.MOREX.r2.5HG0428870/HORVU.MOREX.r2.5HG0369400/HORVU.MOREX.r2.4HG0312080/HORVU.MOREX.r2.4HG0347860/HORVU.MOREX.r2.6HG0520300/HORVU.MOREX.r2.5HG0374410/HORVU.MOREX.r2.7HG0544420/HORVU.MOREX.r2.5HG0403270/HORVU.MOREX.r2.4HG0309820/HORVU.MOREX.r2.4HG0281140/HORVU.MOREX.r2.7HG0538650/HORVU.MOREX.r2.1HG0034210/HORVU.MOREX.r2.3HG0253370/HORVU.MOREX.r2.5HG0444090/HORVU.MOR…	23	The directed movement of proteins into, out of or within a cell, or between cells, by means of some agent such as a transporter or pore.	BP	protein transport	R_cluster3
GO:0015977	Ribulose bisphosphate carboxylase small chain	4/390	32/32782	0.000545005	0.00795229	0.00632819	HORVU.MOREX.r2.1HG0029020/HORVU.MOREX.r2.2HG0085980/HORVU.MOREX.r2.2HG0086010/HORVU.MOREX.r2.2HG0086020	4	A metabolic process in which carbon (usually derived from carbon dioxide) is incorporated into organic compounds (usually carbohydrates).	BP	carbon fixation	R_cluster3
GO:0015979	Photosystem II CP43 reaction center protein	8/390	221/32782	0.00519393	0.0493423	0.0392651	HORVU.MOREX.r2.1HG0036700/HORVU.MOREX.r2.5HG0434470/HORVU.MOREX.r2.1HG0029020/HORVU.MOREX.r2.1HG0071390/HORVU.MOREX.r2.2HG0085980/HORVU.MOREX.r2.2HG0086010/HORVU.MOREX.r2.2HG0086020/HORVU.MOREX.r2.5HG0438210	8	The synthesis by organisms of organic chemical compounds, especially carbohydrates, from carbon dioxide (CO2) using energy obtained from light rather than from the oxidation of chemical compounds.	BP	photosynthesis	R_cluster3
GO:0016192	Transforming growth factor-beta receptor-associated protein 1	29/390	159/32782	6.85407e-26	2.865e-23	2.27988e-23	HORVU.MOREX.r2.3HG0198600/HORVU.MOREX.r2.6HG0501850/HORVU.MOREX.r2.5HG0428870/HORVU.MOREX.r2.7HG0532700/HORVU.MOREX.r2.4HG0312080/HORVU.MOREX.r2.4HG0347860/HORVU.MOREX.r2.6HG0520300/HORVU.MOREX.r2.7HG0544420/HORVU.MOREX.r2.1HG0065550/HORVU.MOREX.r2.2HG0086780/HORVU.MOREX.r2.5HG0385600/HORVU.MOREX.r2.4HG0295930/HORVU.MOREX.r2.5HG0429640/HORVU.MOREX.r2.2HG0098530/HORVU.MOREX.r2.4HG0298620/HORVU.MOR…	29	A cellular transport process in which transported substances are moved in membrane-bounded vesicles; transported substances are enclosed in the vesicle lumen or located in the vesicle membrane. The process begins with a step that directs a substance to the forming vesicle, and includes vesicle budding and coating. Vesicles are then targeted to, and fuse with, an acceptor membrane.	BP	vesicle-mediated transport	R_cluster3
GO:0016984	Ribulose bisphosphate carboxylase small chain	4/390	25/32782	0.000204731	0.00407512	0.00324286	HORVU.MOREX.r2.1HG0029020/HORVU.MOREX.r2.2HG0085980/HORVU.MOREX.r2.2HG0086010/HORVU.MOREX.r2.2HG0086020	4	Catalysis of the reaction: D-ribulose 1,5-bisphosphate + CO2 + H2O = 2 3-phospho-D-glycerate.	MF	ribulose-bisphosphate carboxylase activity	R_cluster3
GO:0019877	Succinyl-diaminopimelate desuccinylase	3/390	15/32782	0.000683574	0.00921723	0.00733479	HORVU.MOREX.r2.7HG0540790/HORVU.MOREX.r2.2HG0098330/HORVU.MOREX.r2.6HG0484190	3	The chemical reactions and pathways resulting in the formation of diaminopimelate, both as an intermediate in lysine biosynthesis and as a component (as meso-diaminopimelate) of the peptidoglycan of Gram-negative bacterial cell walls.	BP	diaminopimelate biosynthetic process	R_cluster3
GO:0022900	Dihydrolipoyl dehydrogenase	10/390	310/32782	0.00426459	0.0424429	0.0337747	HORVU.MOREX.r2.1HG0019760/HORVU.MOREX.r2.1HG0052160/HORVU.MOREX.r2.1HG0011090/HORVU.MOREX.r2.1HG0042190/HORVU.MOREX.r2.7HG0572100/HORVU.MOREX.r2.2HG0137070/HORVU.MOREX.r2.5HG0427220/HORVU.MOREX.r2.3HG0253360/HORVU.MOREX.r2.7HG0586250/HORVU.MOREX.r2.7HG0586260	10	A process in which a series of electron carriers operate together to transfer electrons from donors to any of several different terminal electron acceptors to generate a transmembrane electrochemical gradient.	BP	electron transport chain	R_cluster3
GO:0030117	Coatomer subunit gamma	9/390	29/32782	3.53443e-11	3.69348e-09	2.93916e-09	HORVU.MOREX.r2.5HG0428870/HORVU.MOREX.r2.4HG0312080/HORVU.MOREX.r2.4HG0347860/HORVU.MOREX.r2.6HG0520300/HORVU.MOREX.r2.7HG0544420/HORVU.MOREX.r2.4HG0281140/HORVU.MOREX.r2.7HG0538650/HORVU.MOREX.r2.1HG0034210/HORVU.MOREX.r2.1HG0044600	9	Any of several different proteinaceous coats that can associate with membranes. Membrane coats include those formed by clathrin plus an adaptor complex, the COPI and COPII complexes, and possibly others. They are found associated with membranes on many vesicles as well as other membrane features such as pits and perhaps tubules.	CC	membrane coat	R_cluster3
GO:0030126	Coatomer subunit gamma	3/390	11/32782	0.000256817	0.00487953	0.00388298	HORVU.MOREX.r2.4HG0281140/HORVU.MOREX.r2.1HG0034210/HORVU.MOREX.r2.3HG0253370	3	One of two multimeric complexes that forms a membrane vesicle coat. The mammalian COPI subunits are called alpha-, beta-, beta'-, gamma-, delta-, epsilon- and zeta-COP. Vesicles with COPI coats are found associated with Golgi membranes at steady state.	CC	COPI vesicle coat	R_cluster3
GO:0030127	Retrovirus-related Pol polyprotein from transposon TNT 1-94	4/390	38/32782	0.00105767	0.0130031	0.0103475	HORVU.MOREX.r2.5HG0403270/HORVU.MOREX.r2.4HG0309820/HORVU.MOREX.r2.2HG0079930/HORVU.MOREX.r2.4HG0288510	4	One of two multimeric complexes that forms a membrane vesicle coat. COPII is best characterized in S. cerevisiae, where the subunits are called Sar1p, Sec13p, Sec31p, Sec23p, and Sec24p. Vesicles with COPII coats are found associated with endoplasmic reticulum (ER) membranes at steady state.	CC	COPII vesicle coat	R_cluster3
GO:0030131	Serine/threonine-protein phosphatase 7 long form	7/390	19/32782	1.4242e-09	1.19063e-07	9.4747e-08	HORVU.MOREX.r2.6HG0501850/HORVU.MOREX.r2.4HG0312080/HORVU.MOREX.r2.4HG0347860/HORVU.MOREX.r2.6HG0520300/HORVU.MOREX.r2.7HG0544420/HORVU.MOREX.r2.1HG0065080/HORVU.MOREX.r2.3HG0234900	7	A membrane coat adaptor complex that links clathrin to a membrane.	CC	clathrin adaptor complex	R_cluster3
GO:0030663	Coatomer subunit gamma	3/390	14/32782	0.000551714	0.00795229	0.00632819	HORVU.MOREX.r2.7HG0538650/HORVU.MOREX.r2.1HG0034210/HORVU.MOREX.r2.3HG0253370	3	The lipid bilayer surrounding a COPI-coated vesicle.	CC	COPI-coated vesicle membrane	R_cluster3
GO:0031410	Ammonium transporter Rh type B	5/390	83/32782	0.00315721	0.032994	0.0262556	HORVU.MOREX.r2.5HG0385600/HORVU.MOREX.r2.4HG0295930/HORVU.MOREX.r2.7HG0538650/HORVU.MOREX.r2.1HG0034210/HORVU.MOREX.r2.3HG0253370	5	A vesicle found in the cytoplasm of a cell.	CC	cytoplasmic vesicle	R_cluster3
GO:0042823	Pyridoxine/pyridoxamine 5'-phosphate oxidase	4/390	25/32782	0.000204731	0.00407512	0.00324286	HORVU.MOREX.r2.2HG0130400/HORVU.MOREX.r2.6HG0459050/HORVU.MOREX.r2.4HG0298010/HORVU.MOREX.r2.4HG0336500	4	The chemical reactions and pathways resulting in the formation of pyridoxal phosphate, pyridoxal phosphorylated at the hydroxymethyl group of C-5, the active form of vitamin B6.	BP	pyridoxal phosphate biosynthetic process	R_cluster3
GO:0045254	Acetyltransferase component of pyruvate dehydrogenase complex	4/390	10/32782	3.91446e-06	0.000148749	0.00011837	HORVU.MOREX.r2.7HG0528240/HORVU.MOREX.r2.6HG0450620/HORVU.MOREX.r2.4HG0284770/HORVU.MOREX.r2.7HG0581720	4	Complex that carries out the oxidative decarboxylation of pyruvate to form acetyl-CoA; comprises subunits possessing three catalytic activities: pyruvate dehydrogenase (E1), dihydrolipoamide S-acetyltransferase (E2), and dihydrolipoamide dehydrogenase (E3).	CC	pyruvate dehydrogenase complex	R_cluster3
GO:0046914	Heavy metal-associated domain containing protein, expressed	3/390	13/32782	0.00043734	0.00703107	0.00559511	HORVU.MOREX.r2.7HG0597830/HORVU.MOREX.r2.3HG0221330/HORVU.MOREX.r2.6HG0453610	3	Interacting selectively and non-covalently with a transition metal ions; a transition metal is an element whose atom has an incomplete d-subshell of extranuclear electrons, or which gives rise to a cation or cations with an incomplete d-subshell. Transition metals often have more than one valency state. Biologically relevant transition metals include vanadium, manganese, iron, copper, cobalt, nic…	MF	transition metal ion binding	R_cluster3
GO:0046916	Heavy metal-associated domain containing protein, expressed	3/390	12/32782	0.000339405	0.00580355	0.00461828	HORVU.MOREX.r2.7HG0597830/HORVU.MOREX.r2.3HG0221330/HORVU.MOREX.r2.6HG0453610	3	Any process involved in the maintenance of an internal steady state of transition metal ions at the level of a cell. A transition metal is an element whose atom has an incomplete d-subshell of extranuclear electrons, or which gives rise to a cation or cations with an incomplete d-subshell. Transition metals often have more than one valency state. Biologically relevant transition metals include va…	BP	cellular transition metal ion homeostasis	R_cluster3
GO:0048193	Syntaxin protein	6/390	15/32782	1.24731e-08	6.5172e-07	5.18619e-07	HORVU.MOREX.r2.2HG0098530/HORVU.MOREX.r2.3HG0262260/HORVU.MOREX.r2.3HG0271180/HORVU.MOREX.r2.4HG0291420/HORVU.MOREX.r2.5HG0441730/HORVU.MOREX.r2.5HG0388870	6	The directed movement of substances into, out of or within the Golgi apparatus, mediated by vesicles.	BP	Golgi vesicle transport	R_cluster3
GO:0051082	2-oxoglutarate (2OG) and Fe(II)-dependent oxygenase superfamily protein	6/390	107/32782	0.00179775	0.0203097	0.0161618	HORVU.MOREX.r2.5HG0421800/HORVU.MOREX.r2.7HG0619420/HORVU.MOREX.r2.2HG0176780/HORVU.MOREX.r2.5HG0373950/HORVU.MOREX.r2.6HG0461570/HORVU.MOREX.r2.6HG0461610	6	Interacting selectively and non-covalently with an unfolded protein.	MF	unfolded protein binding	R_cluster3
GO:0061025	Vesicle transport V-SNARE protein	7/390	35/32782	1.61319e-07	7.49237e-06	5.9622e-06	HORVU.MOREX.r2.3HG0198600/HORVU.MOREX.r2.7HG0532700/HORVU.MOREX.r2.1HG0065550/HORVU.MOREX.r2.5HG0429640/HORVU.MOREX.r2.5HG0369800/HORVU.MOREX.r2.2HG0123500/HORVU.MOREX.r2.3HG0235390	7	The membrane organization process that joins two lipid bilayers to form a single membrane.	BP	membrane fusion	R_cluster3
GO:0000049	Alanine--tRNA ligase	9/308	115/32782	1.49351e-06	2.36117e-05	1.95392e-05	HORVU.MOREX.r2.1HG0071030/HORVU.MOREX.r2.5HG0363250/HORVU.MOREX.r2.3HG0247870/HORVU.MOREX.r2.7HG0617640/HORVU.MOREX.r2.5HG0363090/HORVU.MOREX.r2.4HG0329770/HORVU.MOREX.r2.4HG0347420/HORVU.MOREX.r2.5HG0398020/HORVU.MOREX.r2.5HG0398040	9	Interacting selectively and non-covalently with transfer RNA.	MF	tRNA binding	R_cluster8
GO:0000439	General transcription factor IIH subunit 5	2/308	11/32782	0.00457581	0.0359977	0.0297889	HORVU.MOREX.r2.2HG0149380/HORVU.MOREX.r2.6HG0458450	2	The 7 subunit core of TFIIH that is a part of either the general transcription factor holo-TFIIH or the nucleotide-excision repair factor 3 complex. In S. cerevisiae/humans the complex is composed of: Ssl2/XPB, Tfb1/p62, Tfb2/p52, Ssl1/p44, Tfb4/p34, Tfb5/p8 and Rad3/XPD.	CC	transcription factor TFIIH core complex	R_cluster8
GO:0001732	Transposon protein, putative, CACTA, En/Spm sub-class	10/308	27/32782	3.39251e-14	1.40789e-12	1.16506e-12	HORVU.MOREX.r2.4HG0308470/HORVU.MOREX.r2.5HG0399730/HORVU.MOREX.r2.6HG0516470/HORVU.MOREX.r2.2HG0132970/HORVU.MOREX.r2.6HG0458540/HORVU.MOREX.r2.3HG0206600/HORVU.MOREX.r2.4HG0337620/HORVU.MOREX.r2.7HG0562200/HORVU.MOREX.r2.1HG0073380/HORVU.MOREX.r2.6HG0456190	10	Joining of the large subunit, with release of IF2/eIF2 and IF3/eIF3. This leaves the functional ribosome at the AUG, with the methionyl/formyl-methionyl-tRNA positioned at the P site.	BP	formation of cytoplasmic translation initiation complex	R_cluster8
GO:0002098	tRNA uridine 5-carboxymethylaminomethyl modification enzyme MnmG	3/308	33/32782	0.00363728	0.0312673	0.0258743	HORVU.MOREX.r2.5HG0365850/HORVU.MOREX.r2.5HG0363090/HORVU.MOREX.r2.5HG0398020	3	The process in which a uridine in position 34 of a tRNA is post-transcriptionally modified.	BP	tRNA wobble uridine modification	R_cluster8
GO:0002161	Leucine--tRNA ligase	5/308	39/32782	3.14025e-05	0.000453289	0.000375106	HORVU.MOREX.r2.3HG0208150/HORVU.MOREX.r2.2HG0099480/HORVU.MOREX.r2.7HG0617640/HORVU.MOREX.r2.5HG0370820/HORVU.MOREX.r2.6HG0513670	5	The hydrolysis of an incorrectly aminoacylated tRNA.	MF	aminoacyl-tRNA editing activity	R_cluster8
GO:0002183	Eukaryotic translation initiation factor 3 subunit D	10/308	24/32782	8.0856e-15	3.83488e-13	3.17345e-13	HORVU.MOREX.r2.4HG0308470/HORVU.MOREX.r2.5HG0399730/HORVU.MOREX.r2.6HG0516470/HORVU.MOREX.r2.2HG0132970/HORVU.MOREX.r2.6HG0458540/HORVU.MOREX.r2.3HG0206600/HORVU.MOREX.r2.4HG0337620/HORVU.MOREX.r2.7HG0562200/HORVU.MOREX.r2.1HG0073380/HORVU.MOREX.r2.6HG0456190	10	The process preceding formation of the peptide bond between the first two amino acids of a protein in the cytoplasm. This includes the formation of a complex of the ribosome, mRNA or circRNA, and an initiation complex that contains the first aminoacyl-tRNA.	BP	cytoplasmic translational initiation	R_cluster8
GO:0003743	Transcription initiation factor TFIID subunit 6	17/308	196/32782	6.28472e-12	1.49038e-10	1.23332e-10	HORVU.MOREX.r2.4HG0319410/HORVU.MOREX.r2.4HG0315180/HORVU.MOREX.r2.5HG0364500/HORVU.MOREX.r2.4HG0308470/HORVU.MOREX.r2.5HG0399730/HORVU.MOREX.r2.6HG0516470/HORVU.MOREX.r2.2HG0132970/HORVU.MOREX.r2.6HG0458540/HORVU.MOREX.r2.3HG0206600/HORVU.MOREX.r2.2HG0089200/HORVU.MOREX.r2.5HG0422000/HORVU.MOREX.r2.4HG0337620/HORVU.MOREX.r2.7HG0562200/HORVU.MOREX.r2.1HG0073380/HORVU.MOREX.r2.6HG0456190/HORVU.MOR…	17	Functions in the initiation of ribosome-mediated translation of mRNA into a polypeptide.	MF	translation initiation factor activity	R_cluster8
GO:0003746	Elongation factor	6/308	113/32782	0.000713509	0.00717833	0.00594022	HORVU.MOREX.r2.5HG0363530/HORVU.MOREX.r2.7HG0594550/HORVU.MOREX.r2.2HG0095490/HORVU.MOREX.r2.4HG0320500/HORVU.MOREX.r2.5HG0427700/HORVU.MOREX.r2.2HG0103440	6	Functions in chain elongation during polypeptide synthesis at the ribosome.	MF	translation elongation factor activity	R_cluster8
GO:0003899	RNA polymerase Rpb1, domain 2 family protein	7/308	208/32782	0.00366798	0.0312673	0.0258743	HORVU.MOREX.r2.1HG0035590/HORVU.MOREX.r2.5HG0441020/HORVU.MOREX.r2.1HG0047060/HORVU.MOREX.r2.1HG0020750/HORVU.MOREX.r2.4HG0288260/HORVU.MOREX.r2.5HG0377400/HORVU.MOREX.r2.4HG0281160	7	Catalysis of the reaction: nucleoside triphosphate + RNA(n) = diphosphate + RNA(n+1). Utilizes a DNA template, i.e. the catalysis of DNA-template-directed extension of the 3'-end of an RNA strand by one nucleotide at a time. Can initiate a chain 'de novo'.	MF	DNA-directed 5'-3' RNA polymerase activity	R_cluster8
GO:0004332	Fructose-bisphosphate aldolase	2/308	10/32782	0.00376715	0.0312673	0.0258743	HORVU.MOREX.r2.3HG0183840/HORVU.MOREX.r2.4HG0291220	2	Catalysis of the reaction: D-fructose 1,6-bisphosphate = glycerone phosphate + D-glyceraldehyde-3-phosphate.	MF	fructose-bisphosphate aldolase activity	R_cluster8
GO:0004812	Leucine--tRNA ligase	18/308	220/32782	4.00334e-12	1.10371e-10	9.13341e-11	HORVU.MOREX.r2.3HG0197100/HORVU.MOREX.r2.3HG0190470/HORVU.MOREX.r2.3HG0208150/HORVU.MOREX.r2.5HG0363250/HORVU.MOREX.r2.3HG0258190/HORVU.MOREX.r2.2HG0099480/HORVU.MOREX.r2.5HG0387260/HORVU.MOREX.r2.5HG0432020/HORVU.MOREX.r2.3HG0247870/HORVU.MOREX.r2.7HG0617640/HORVU.MOREX.r2.3HG0212800/HORVU.MOREX.r2.1HG0064440/HORVU.MOREX.r2.5HG0370820/HORVU.MOREX.r2.1HG0016780/HORVU.MOREX.r2.4HG0329770/HORVU.MOR…	18	Catalysis of the formation of aminoacyl-tRNA from ATP, amino acid, and tRNA with the release of diphosphate and AMP.	MF	aminoacyl-tRNA ligase activity	R_cluster8
GO:0004818	Glutamate--tRNA ligase	2/308	12/32782	0.00545704	0.0393856	0.0325924	HORVU.MOREX.r2.3HG0212800/HORVU.MOREX.r2.1HG0064440	2	Catalysis of the reaction: ATP + L-glutamate + tRNA(Glu) = AMP + diphosphate + L-glutamyl-tRNA(Glu).	MF	glutamate-tRNA ligase activity	R_cluster8
GO:0004825	Methionine-tRNA ligase, putative	3/308	15/32782	0.000343676	0.00380334	0.00314735	HORVU.MOREX.r2.5HG0363250/HORVU.MOREX.r2.3HG0247870/HORVU.MOREX.r2.4HG0329770	3	Catalysis of the reaction: ATP + L-methionine + tRNA(Met) = AMP + diphosphate + L-methionyl-tRNA(Met).	MF	methionine-tRNA ligase activity	R_cluster8
GO:0004826	Phenylalanine--tRNA ligase beta subunit	2/308	10/32782	0.00376715	0.0312673	0.0258743	HORVU.MOREX.r2.5HG0370820/HORVU.MOREX.r2.5HG0398040	2	Catalysis of the reaction: ATP + L-phenylalanine + tRNA(Phe) = AMP + diphosphate + L-phenylalanyl-tRNA(Phe).	MF	phenylalanine-tRNA ligase activity	R_cluster8
GO:0005643	Nuclear pore complex protein Nup107	3/308	42/32782	0.00719281	0.0497503	0.0411694	HORVU.MOREX.r2.1HG0049050/HORVU.MOREX.r2.5HG0365730/HORVU.MOREX.r2.6HG0479310	3	Any of the numerous similar discrete openings in the nuclear envelope of a eukaryotic cell, where the inner and outer nuclear membranes are joined.	CC	nuclear pore	R_cluster8
GO:0005829	MICOS complex subunit Mic25	13/308	480/32782	0.000683755	0.00709396	0.0058704	HORVU.MOREX.r2.3HG0253280/HORVU.MOREX.r2.1HG0035590/HORVU.MOREX.r2.1HG0070120/HORVU.MOREX.r2.1HG0031510/HORVU.MOREX.r2.4HG0337620/HORVU.MOREX.r2.2HG0118970/HORVU.MOREX.r2.3HG0210600/HORVU.MOREX.r2.5HG0365850/HORVU.MOREX.r2.7HG0574400/HORVU.MOREX.r2.5HG0435890/HORVU.MOREX.r2.1HG0004870/HORVU.MOREX.r2.1HG0065890/HORVU.MOREX.r2.7HG0572510	13	The part of the cytoplasm that does not contain organelles but which does contain other particulate matter, such as protein complexes.	CC	cytosol	R_cluster8
GO:0005852	Transposon protein, putative, CACTA, En/Spm sub-class	10/308	38/32782	1.73528e-12	5.23738e-11	4.33404e-11	HORVU.MOREX.r2.4HG0308470/HORVU.MOREX.r2.5HG0399730/HORVU.MOREX.r2.6HG0516470/HORVU.MOREX.r2.2HG0132970/HORVU.MOREX.r2.6HG0458540/HORVU.MOREX.r2.3HG0206600/HORVU.MOREX.r2.4HG0337620/HORVU.MOREX.r2.7HG0562200/HORVU.MOREX.r2.1HG0073380/HORVU.MOREX.r2.6HG0456190	10	A complex of several polypeptides that plays at least two important roles in protein synthesis: First, eIF3 binds to the 40S ribosome and facilitates loading of the Met-tRNA/eIF2.GTP ternary complex to form the 43S preinitiation complex. Subsequently, eIF3 apparently assists eIF4 in recruiting mRNAs to the 43S complex. The eIF3 complex contains five conserved core subunits, and may contain severa…	CC	eukaryotic translation initiation factor 3 complex	R_cluster8
GO:0006048	Serine/threonine-protein phosphatase 7 long form-like protein	2/308	12/32782	0.00545704	0.0393856	0.0325924	HORVU.MOREX.r2.6HG0501530/HORVU.MOREX.r2.7HG0560200	2	The chemical reactions and pathways resulting in the formation of UDP-N-acetylglucosamine, a substance composed of N-acetylglucosamine, a common structural unit of oligosaccharides, in glycosidic linkage with uridine diphosphate.	BP	UDP-N-acetylglucosamine biosynthetic process	R_cluster8
GO:0006401	ATP-dependent RNA helicase family protein	3/308	10/32782	9.38564e-05	0.00119847	0.000991762	HORVU.MOREX.r2.6HG0482280/HORVU.MOREX.r2.7HG0527930/HORVU.MOREX.r2.2HG0100410	3	The chemical reactions and pathways resulting in the breakdown of RNA, ribonucleic acid, one of the two main type of nucleic acid, consisting of a long, unbranched macromolecule formed from ribonucleotides joined in 3',5'-phosphodiester linkage.	BP	RNA catabolic process	R_cluster8
GO:0006413	Transcription initiation factor TFIID subunit 6	17/308	203/32782	1.10346e-11	2.44234e-10	2.02108e-10	HORVU.MOREX.r2.4HG0319410/HORVU.MOREX.r2.4HG0315180/HORVU.MOREX.r2.5HG0364500/HORVU.MOREX.r2.4HG0308470/HORVU.MOREX.r2.5HG0399730/HORVU.MOREX.r2.6HG0516470/HORVU.MOREX.r2.2HG0132970/HORVU.MOREX.r2.6HG0458540/HORVU.MOREX.r2.3HG0206600/HORVU.MOREX.r2.2HG0089200/HORVU.MOREX.r2.5HG0422000/HORVU.MOREX.r2.4HG0337620/HORVU.MOREX.r2.7HG0562200/HORVU.MOREX.r2.1HG0073380/HORVU.MOREX.r2.6HG0456190/HORVU.MOR…	17	The process preceding formation of the peptide bond between the first two amino acids of a protein. This includes the formation of a complex of the ribosome, mRNA or circRNA, and an initiation complex that contains the first aminoacyl-tRNA.	BP	translational initiation	R_cluster8
GO:0006414	Elongation factor	6/308	112/32782	0.000680913	0.00709396	0.0058704	HORVU.MOREX.r2.5HG0363530/HORVU.MOREX.r2.7HG0594550/HORVU.MOREX.r2.2HG0095490/HORVU.MOREX.r2.4HG0320500/HORVU.MOREX.r2.5HG0427700/HORVU.MOREX.r2.2HG0103440	6	The successive addition of amino acid residues to a nascent polypeptide chain during protein biosynthesis.	BP	translational elongation	R_cluster8
GO:0006418	Leucine--tRNA ligase	14/308	185/32782	2.81102e-09	4.91189e-08	4.06469e-08	HORVU.MOREX.r2.3HG0197100/HORVU.MOREX.r2.3HG0190470/HORVU.MOREX.r2.3HG0208150/HORVU.MOREX.r2.5HG0363250/HORVU.MOREX.r2.3HG0258190/HORVU.MOREX.r2.2HG0099480/HORVU.MOREX.r2.5HG0387260/HORVU.MOREX.r2.5HG0432020/HORVU.MOREX.r2.3HG0247870/HORVU.MOREX.r2.7HG0617640/HORVU.MOREX.r2.3HG0212800/HORVU.MOREX.r2.1HG0064440/HORVU.MOREX.r2.1HG0016780/HORVU.MOREX.r2.4HG0329770	14	The synthesis of aminoacyl tRNA by the formation of an ester bond between the 3'-hydroxyl group of the most 3' adenosine of the tRNA and the alpha carboxylic acid group of an amino acid, to be used in ribosome-mediated polypeptide synthesis.	BP	tRNA aminoacylation for protein translation	R_cluster8
GO:0006424	Glutamate--tRNA ligase	2/308	12/32782	0.00545704	0.0393856	0.0325924	HORVU.MOREX.r2.3HG0212800/HORVU.MOREX.r2.1HG0064440	2	The process of coupling glutamate to glutamyl-tRNA, catalyzed by glutamyl-tRNA synthetase. The glutamyl-tRNA synthetase is a class-I synthetase. The activated amino acid is transferred to the 2'-OH group of a glutamic acid-accetping tRNA. The 2'-O-aminoacyl-tRNA will ultimately migrate to the 3' position via transesterification.	BP	glutamyl-tRNA aminoacylation	R_cluster8
GO:0006431	Methionine-tRNA ligase, putative	3/308	15/32782	0.000343676	0.00380334	0.00314735	HORVU.MOREX.r2.5HG0363250/HORVU.MOREX.r2.3HG0247870/HORVU.MOREX.r2.4HG0329770	3	The process of coupling methionine to methionyl-tRNA, catalyzed by methionyl-tRNA synthetase. The methionyl-tRNA synthetase is a class-I synthetase. The activated amino acid is transferred to the 2'-OH group of a methionine-accetping tRNA. The 2'-O-aminoacyl-tRNA will ultimately migrate to the 3' position via transesterification.	BP	methionyl-tRNA aminoacylation	R_cluster8
GO:0006432	Phenylalanine--tRNA ligase beta subunit	2/308	10/32782	0.00376715	0.0312673	0.0258743	HORVU.MOREX.r2.5HG0370820/HORVU.MOREX.r2.5HG0398040	2	The process of coupling phenylalanine to phenylalanyl-tRNA, catalyzed by phenylalanyl-tRNA synthetase. The phenylalanyl-tRNA synthetase is a class-II synthetase. However, unlike other class II enzymes, The activated amino acid is transferred to the 2'-OH group of a phenylalanine-accepting tRNA. The 2'-O-aminoacyl-tRNA will ultimately migrate to the 3' position via transesterification.	BP	phenylalanyl-tRNA aminoacylation	R_cluster8
GO:0006457	Peptidyl-prolyl cis-trans isomerase	15/308	182/32782	2.29896e-10	4.48974e-09	3.71535e-09	HORVU.MOREX.r2.7HG0549490/HORVU.MOREX.r2.7HG0558720/HORVU.MOREX.r2.6HG0523490/HORVU.MOREX.r2.6HG0467890/HORVU.MOREX.r2.1HG0031510/HORVU.MOREX.r2.2HG0098650/HORVU.MOREX.r2.5HG0416920/HORVU.MOREX.r2.4HG0330680/HORVU.MOREX.r2.7HG0588640/HORVU.MOREX.r2.5HG0435890/HORVU.MOREX.r2.7HG0595300/HORVU.MOREX.r2.4HG0308580/HORVU.MOREX.r2.1HG0065890/HORVU.MOREX.r2.1HG0077450/HORVU.MOREX.r2.3HG0256290	15	The process of assisting in the covalent and noncovalent assembly of single chain polypeptides or multisubunit complexes into the correct tertiary structure.	BP	protein folding	R_cluster8
GO:0009522	RING/U-box superfamily protein	16/308	68/32782	2.361e-18	3.91926e-16	3.24327e-16	HORVU.MOREX.r2.2HG0142880/HORVU.MOREX.r2.5HG0418240/HORVU.MOREX.r2.1HG0073450/HORVU.MOREX.r2.7HG0560430/HORVU.MOREX.r2.5HG0401340/HORVU.MOREX.r2.1HG0064430/HORVU.MOREX.r2.1HG0073510/HORVU.MOREX.r2.2HG0108480/HORVU.MOREX.r2.3HG0249480/HORVU.MOREX.r2.4HG0287380/HORVU.MOREX.r2.5HG0434090/HORVU.MOREX.r2.5HG0434060/HORVU.MOREX.r2.5HG0434070/HORVU.MOREX.r2.6HG0460210/HORVU.MOREX.r2.6HG0523360/HORVU.MOR…	16	A photosystem that contains an iron-sulfur reaction center associated with accessory pigments and electron carriers. In cyanobacteria and chloroplasts, photosystem I functions as a light-dependent plastocyanin-ferredoxin oxidoreductase, transferring electrons from plastocyanin to ferredoxin; in photosynthetic bacteria that have only a single type I photosystem, such as the green sulfur bacteria, …	CC	photosystem I	R_cluster8
GO:0009523	Photosystem II CP43 reaction center protein	17/308	119/32782	1.53151e-15	1.01692e-13	8.41523e-14	HORVU.MOREX.r2.2HG0142880/HORVU.MOREX.r2.5HG0418240/HORVU.MOREX.r2.1HG0073450/HORVU.MOREX.r2.7HG0560430/HORVU.MOREX.r2.5HG0401340/HORVU.MOREX.r2.1HG0064430/HORVU.MOREX.r2.1HG0073510/HORVU.MOREX.r2.2HG0108480/HORVU.MOREX.r2.3HG0249480/HORVU.MOREX.r2.4HG0287380/HORVU.MOREX.r2.5HG0434090/HORVU.MOREX.r2.5HG0434060/HORVU.MOREX.r2.5HG0434070/HORVU.MOREX.r2.6HG0460210/HORVU.MOREX.r2.6HG0523360/HORVU.MOR…	17	A photosystem that contains a pheophytin-quinone reaction center with associated accessory pigments and electron carriers. In cyanobacteria and chloroplasts, in the presence of light, PSII functions as a water-plastoquinone oxidoreductase, transferring electrons from water to plastoquinone, whereas other photosynthetic bacteria carry out anoxygenic photosynthesis and oxidize other compounds to re…	CC	photosystem II	R_cluster8
GO:0009534	Peptidyl-prolyl cis-trans isomerase	3/308	36/32782	0.00466236	0.0359977	0.0297889	HORVU.MOREX.r2.7HG0560430/HORVU.MOREX.r2.3HG0183840/HORVU.MOREX.r2.3HG0214090	3	Sac-like membranous structures (cisternae) in a chloroplast combined into stacks (grana) and present singly in the stroma (stroma thylakoids or frets) as interconnections between grana. An example of this component is found in Arabidopsis thaliana.	CC	chloroplast thylakoid	R_cluster8
GO:0009535	Peptidyl-prolyl cis-trans isomerase	17/308	158/32782	1.85673e-13	6.16436e-12	5.10113e-12	HORVU.MOREX.r2.2HG0142880/HORVU.MOREX.r2.5HG0418240/HORVU.MOREX.r2.1HG0073450/HORVU.MOREX.r2.7HG0560430/HORVU.MOREX.r2.5HG0401340/HORVU.MOREX.r2.1HG0064430/HORVU.MOREX.r2.1HG0073510/HORVU.MOREX.r2.2HG0108480/HORVU.MOREX.r2.3HG0214090/HORVU.MOREX.r2.3HG0249480/HORVU.MOREX.r2.4HG0287380/HORVU.MOREX.r2.5HG0434090/HORVU.MOREX.r2.5HG0434060/HORVU.MOREX.r2.5HG0434070/HORVU.MOREX.r2.6HG0460210/HORVU.MOR…	17	The pigmented membrane of a chloroplast thylakoid. An example of this component is found in Arabidopsis thaliana.	CC	chloroplast thylakoid membrane	R_cluster8
GO:0009536	ATP synthase subunit b, chloroplastic	20/308	415/32782	3.27671e-09	5.43933e-08	4.50116e-08	HORVU.MOREX.r2.5HG0363530/HORVU.MOREX.r2.2HG0142880/HORVU.MOREX.r2.5HG0418240/HORVU.MOREX.r2.1HG0073450/HORVU.MOREX.r2.7HG0560430/HORVU.MOREX.r2.5HG0401340/HORVU.MOREX.r2.3HG0206270/HORVU.MOREX.r2.1HG0064430/HORVU.MOREX.r2.1HG0073510/HORVU.MOREX.r2.2HG0108480/HORVU.MOREX.r2.3HG0183840/HORVU.MOREX.r2.3HG0214090/HORVU.MOREX.r2.3HG0249480/HORVU.MOREX.r2.4HG0287380/HORVU.MOREX.r2.5HG0434090/HORVU.MOR…	20	Any member of a family of organelles found in the cytoplasm of plants and some protists, which are membrane-bounded and contain DNA. Plant plastids develop from a common type, the proplastid.	CC	plastid	R_cluster8
GO:0009579	Peptidyl-prolyl cis-trans isomerase	16/308	198/32782	7.69427e-11	1.59656e-09	1.32119e-09	HORVU.MOREX.r2.2HG0142880/HORVU.MOREX.r2.5HG0418240/HORVU.MOREX.r2.1HG0073450/HORVU.MOREX.r2.7HG0560430/HORVU.MOREX.r2.5HG0401340/HORVU.MOREX.r2.1HG0064430/HORVU.MOREX.r2.1HG0073510/HORVU.MOREX.r2.2HG0108480/HORVU.MOREX.r2.3HG0249480/HORVU.MOREX.r2.4HG0287380/HORVU.MOREX.r2.5HG0434090/HORVU.MOREX.r2.5HG0434060/HORVU.MOREX.r2.5HG0434070/HORVU.MOREX.r2.6HG0460210/HORVU.MOREX.r2.6HG0523360/HORVU.MOR…	16	A membranous cellular structure that bears the photosynthetic pigments in plants, algae, and cyanobacteria. In cyanobacteria thylakoids are of various shapes and are attached to, or continuous with, the plasma membrane. In eukaryotes they are flattened, membrane-bounded disk-like structures located in the chloroplasts; in the chloroplasts of higher plants the thylakoids form dense stacks called g…	CC	thylakoid	R_cluster8
GO:0009765	Chlorophyll a-b binding protein, chloroplastic	16/308	32/32782	1.30774e-24	4.3417e-22	3.59285e-22	HORVU.MOREX.r2.2HG0142880/HORVU.MOREX.r2.5HG0418240/HORVU.MOREX.r2.1HG0073450/HORVU.MOREX.r2.7HG0560430/HORVU.MOREX.r2.5HG0401340/HORVU.MOREX.r2.1HG0064430/HORVU.MOREX.r2.1HG0073510/HORVU.MOREX.r2.2HG0108480/HORVU.MOREX.r2.3HG0249480/HORVU.MOREX.r2.4HG0287380/HORVU.MOREX.r2.5HG0434090/HORVU.MOREX.r2.5HG0434060/HORVU.MOREX.r2.5HG0434070/HORVU.MOREX.r2.6HG0460210/HORVU.MOREX.r2.6HG0523360/HORVU.MOR…	16	Absorption and transfer of the energy absorbed from light photons between photosystem reaction centers.	BP	photosynthesis, light harvesting	R_cluster8
GO:0009941	Transducin/WD-like repeat-protein	4/308	76/32782	0.00576867	0.0407489	0.0337206	HORVU.MOREX.r2.5HG0436100/HORVU.MOREX.r2.4HG0343480/HORVU.MOREX.r2.7HG0560430/HORVU.MOREX.r2.3HG0214090	4	The double lipid bilayer enclosing the chloroplast and separating its contents from the rest of the cytoplasm; includes the intermembrane space.	CC	chloroplast envelope	R_cluster8
GO:0015979	Photosystem II CP43 reaction center protein	18/308	221/32782	4.32175e-12	1.10371e-10	9.13341e-11	HORVU.MOREX.r2.2HG0142880/HORVU.MOREX.r2.5HG0418240/HORVU.MOREX.r2.1HG0073450/HORVU.MOREX.r2.7HG0560430/HORVU.MOREX.r2.5HG0401340/HORVU.MOREX.r2.1HG0064430/HORVU.MOREX.r2.1HG0073510/HORVU.MOREX.r2.2HG0108480/HORVU.MOREX.r2.3HG0214090/HORVU.MOREX.r2.3HG0249480/HORVU.MOREX.r2.4HG0287380/HORVU.MOREX.r2.5HG0434090/HORVU.MOREX.r2.5HG0434060/HORVU.MOREX.r2.5HG0434070/HORVU.MOREX.r2.6HG0460210/HORVU.MOR…	18	The synthesis by organisms of organic chemical compounds, especially carbohydrates, from carbon dioxide (CO2) using energy obtained from light rather than from the oxidation of chemical compounds.	BP	photosynthesis	R_cluster8
GO:0016168	Photosystem II CP43 reaction center protein	16/308	77/32782	2.036e-17	2.25318e-15	1.86455e-15	HORVU.MOREX.r2.2HG0142880/HORVU.MOREX.r2.5HG0418240/HORVU.MOREX.r2.1HG0073450/HORVU.MOREX.r2.7HG0560430/HORVU.MOREX.r2.5HG0401340/HORVU.MOREX.r2.1HG0064430/HORVU.MOREX.r2.1HG0073510/HORVU.MOREX.r2.2HG0108480/HORVU.MOREX.r2.3HG0249480/HORVU.MOREX.r2.4HG0287380/HORVU.MOREX.r2.5HG0434090/HORVU.MOREX.r2.5HG0434060/HORVU.MOREX.r2.5HG0434070/HORVU.MOREX.r2.6HG0460210/HORVU.MOREX.r2.6HG0523360/HORVU.MOR…	16	Interacting selectively and non-covalently with chlorophyll; any compound of magnesium complexed in a porphyrin (tetrapyrrole) ring and which functions as a photosynthetic pigment.	MF	chlorophyll binding	R_cluster8
GO:0016282	Eukaryotic translation initiation factor 3 subunit D	10/308	28/32782	5.23364e-14	1.93063e-12	1.59764e-12	HORVU.MOREX.r2.4HG0308470/HORVU.MOREX.r2.5HG0399730/HORVU.MOREX.r2.6HG0516470/HORVU.MOREX.r2.2HG0132970/HORVU.MOREX.r2.6HG0458540/HORVU.MOREX.r2.3HG0206600/HORVU.MOREX.r2.4HG0337620/HORVU.MOREX.r2.7HG0562200/HORVU.MOREX.r2.1HG0073380/HORVU.MOREX.r2.6HG0456190	10	A protein complex composed of the 40S ribosomal subunit plus eIF1A, eIF3, and eIF2-GTP-bound methionyl-initiator methionine tRNA.	CC	eukaryotic 43S preinitiation complex	R_cluster8
GO:0016717	D-ribose-binding periplasmic	2/308	10/32782	0.00376715	0.0312673	0.0258743	HORVU.MOREX.r2.6HG0505350/HORVU.MOREX.r2.5HG0385770	2	Catalysis of an oxidation-reduction (redox) reaction in which hydrogen or electrons are transferred from each of two donors, and molecular oxygen is reduced to two molecules of water.	MF	oxidoreductase activity, acting on paired donors, with oxidation of a pair of donors resulting in the reduction of molecular oxygen to two molecules of water	R_cluster8
GO:0018298	Phytochrome B	16/308	86/32782	1.33458e-16	1.1077e-14	9.16646e-15	HORVU.MOREX.r2.2HG0142880/HORVU.MOREX.r2.5HG0418240/HORVU.MOREX.r2.1HG0073450/HORVU.MOREX.r2.7HG0560430/HORVU.MOREX.r2.5HG0401340/HORVU.MOREX.r2.1HG0064430/HORVU.MOREX.r2.1HG0073510/HORVU.MOREX.r2.2HG0108480/HORVU.MOREX.r2.3HG0249480/HORVU.MOREX.r2.4HG0287380/HORVU.MOREX.r2.5HG0434090/HORVU.MOREX.r2.5HG0434060/HORVU.MOREX.r2.5HG0434070/HORVU.MOREX.r2.6HG0460210/HORVU.MOREX.r2.6HG0523360/HORVU.MOR…	16	The covalent or noncovalent attachment of a chromophore to a protein.	BP	protein-chromophore linkage	R_cluster8
GO:0019904	Guanine nucleotide-binding protein G(k) subunit alpha	3/308	35/32782	0.00430342	0.0348472	0.0288368	HORVU.MOREX.r2.3HG0210600/HORVU.MOREX.r2.7HG0560430/HORVU.MOREX.r2.4HG0301490	3	Interacting selectively and non-covalently with a specific domain of a protein.	MF	protein domain specific binding	R_cluster8
GO:0033290	Eukaryotic translation initiation factor 3 subunit D	10/308	24/32782	8.0856e-15	3.83488e-13	3.17345e-13	HORVU.MOREX.r2.4HG0308470/HORVU.MOREX.r2.5HG0399730/HORVU.MOREX.r2.6HG0516470/HORVU.MOREX.r2.2HG0132970/HORVU.MOREX.r2.6HG0458540/HORVU.MOREX.r2.3HG0206600/HORVU.MOREX.r2.4HG0337620/HORVU.MOREX.r2.7HG0562200/HORVU.MOREX.r2.1HG0073380/HORVU.MOREX.r2.6HG0456190	10	A protein complex composed of the small ribosomal subunit, eIF3, eIF1A, methionyl-initiatior methionine and a capped mRNA. The complex is initially positioned at the 5'-end of the capped mRNA.	CC	eukaryotic 48S preinitiation complex	R_cluster8
GO:0034227	Ser/Thr-rich protein T10 in DGCR region	3/308	13/32782	0.000219057	0.00269359	0.002229	HORVU.MOREX.r2.5HG0365850/HORVU.MOREX.r2.5HG0363090/HORVU.MOREX.r2.5HG0398020	3	The addition a sulfur atom to a nucleotide in a tRNA molecule.	BP	tRNA thio-modification	R_cluster8
GO:0043039	Alanine--tRNA ligase	6/308	48/32782	5.76907e-06	8.70605e-05	7.20444e-05	HORVU.MOREX.r2.3HG0197100/HORVU.MOREX.r2.3HG0190470/HORVU.MOREX.r2.3HG0212800/HORVU.MOREX.r2.1HG0064440/HORVU.MOREX.r2.4HG0347420/HORVU.MOREX.r2.5HG0398040	6	The chemical reactions and pathways by which the various amino acids become bonded to their corresponding tRNAs. The most common route for synthesis of aminoacyl tRNA is by the formation of an ester bond between the 3'-hydroxyl group of the most 3' adenosine of the tRNA and the alpha carboxylic acid group of an amino acid, usually catalyzed by the cognate aminoacyl-tRNA ligase. A given aminoacyl-…	BP	tRNA aminoacylation	R_cluster8
GO:0044183	60 kDa chaperonin	3/308	14/32782	0.000276863	0.00328281	0.00271659	HORVU.MOREX.r2.1HG0031510/HORVU.MOREX.r2.1HG0065890/HORVU.MOREX.r2.1HG0077450	3	Interacting selectively and non-covalently with any protein or protein complex (a complex of two or more proteins that may include other nonprotein molecules) that contributes to the process of protein folding.	MF	protein folding chaperone	R_cluster8
GO:0044237	Methylthioribose-1-phosphate isomerase	4/308	22/32782	4.8909e-05	0.000649511	0.000537484	HORVU.MOREX.r2.1HG0028810/HORVU.MOREX.r2.5HG0422000/HORVU.MOREX.r2.2HG0102760/HORVU.MOREX.r2.5HG0378260	4	The chemical reactions and pathways by which individual cells transform chemical substances.	BP	cellular metabolic process	R_cluster8
GO:0046686	Inorganic pyrophosphatase family protein	3/308	33/32782	0.00363728	0.0312673	0.0258743	HORVU.MOREX.r2.4HG0329640/HORVU.MOREX.r2.1HG0004870/HORVU.MOREX.r2.3HG0183840	3	Any process that results in a change in state or activity of a cell or an organism (in terms of movement, secretion, enzyme production, gene expression, etc.) as a result of a cadmium (Cd) ion stimulus.	BP	response to cadmium ion	R_cluster8
GO:0051082	2-oxoglutarate (2OG) and Fe(II)-dependent oxygenase superfamily protein	12/308	107/32782	4.27359e-10	7.8824e-09	6.52285e-09	HORVU.MOREX.r2.7HG0549490/HORVU.MOREX.r2.7HG0558720/HORVU.MOREX.r2.6HG0523490/HORVU.MOREX.r2.6HG0467890/HORVU.MOREX.r2.1HG0031510/HORVU.MOREX.r2.5HG0416920/HORVU.MOREX.r2.4HG0330680/HORVU.MOREX.r2.7HG0588640/HORVU.MOREX.r2.7HG0595300/HORVU.MOREX.r2.4HG0308580/HORVU.MOREX.r2.1HG0065890/HORVU.MOREX.r2.3HG0256290	12	Interacting selectively and non-covalently with an unfolded protein.	MF	unfolded protein binding	R_cluster8
GO:0106074	Leucine--tRNA ligase	5/308	40/32782	3.5614e-05	0.000492661	0.000407687	HORVU.MOREX.r2.3HG0208150/HORVU.MOREX.r2.2HG0099480/HORVU.MOREX.r2.7HG0617640/HORVU.MOREX.r2.5HG0370820/HORVU.MOREX.r2.6HG0513670	5	Any process which detects an amino-acid acetylated tRNA is charged with the correct amino acid, or removes incorrect amino acids from a charged tRNA. This process can be performed by tRNA synthases, or by subsequent reactions after tRNA aminoacylation.	BP	aminoacyl-tRNA metabolism involved in translational fidelity	R_cluster8
GO:0000162	LURP-one-like protein	3/206	21/32782	0.00029918	0.00523564	0.0042515	HORVU.MOREX.r2.4HG0342490/HORVU.MOREX.r2.1HG0077030/HORVU.MOREX.r2.7HG0582550	3	The chemical reactions and pathways resulting in the formation of tryptophan, the chiral amino acid 2-amino-3-(1H-indol-3-yl)propanoic acid; tryptophan is synthesized from chorismate via anthranilate.	BP	tryptophan biosynthetic process	R_cluster14
GO:0000502	Proteasome subunit alpha type	25/206	94/32782	5.66622e-34	1.38822e-31	1.12728e-31	HORVU.MOREX.r2.1HG0056110/HORVU.MOREX.r2.2HG0161350/HORVU.MOREX.r2.4HG0337290/HORVU.MOREX.r2.1HG0074920/HORVU.MOREX.r2.4HG0279770/HORVU.MOREX.r2.5HG0415180/HORVU.MOREX.r2.7HG0570790/HORVU.MOREX.r2.7HG0544550/HORVU.MOREX.r2.4HG0344760/HORVU.MOREX.r2.4HG0308660/HORVU.MOREX.r2.2HG0146120/HORVU.MOREX.r2.7HG0537870/HORVU.MOREX.r2.7HG0541070/HORVU.MOREX.r2.2HG0129920/HORVU.MOREX.r2.5HG0434930/HORVU.MOR…	25	A large multisubunit complex which catalyzes protein degradation, found in eukaryotes, archaea and some bacteria. In eukaryotes, this complex consists of the barrel shaped proteasome core complex and one or two associated proteins or complexes that act in regulating entry into or exit from the core.	CC	proteasome complex	R_cluster14
GO:0003684	DUF241 domain protein (DUF241)	3/206	45/32782	0.0028573	0.031195	0.0253313	HORVU.MOREX.r2.5HG0397220/HORVU.MOREX.r2.7HG0556350/HORVU.MOREX.r2.5HG0446440	3	Interacting selectively and non-covalently with damaged DNA.	MF	damaged DNA binding	R_cluster14
GO:0004175	Proteasome subunit alpha type	15/206	52/32782	2.04865e-21	1.00384e-19	8.15147e-20	HORVU.MOREX.r2.1HG0056110/HORVU.MOREX.r2.4HG0337290/HORVU.MOREX.r2.1HG0074920/HORVU.MOREX.r2.4HG0279770/HORVU.MOREX.r2.5HG0415180/HORVU.MOREX.r2.7HG0570790/HORVU.MOREX.r2.7HG0544550/HORVU.MOREX.r2.4HG0308660/HORVU.MOREX.r2.7HG0537870/HORVU.MOREX.r2.7HG0541070/HORVU.MOREX.r2.5HG0434930/HORVU.MOREX.r2.3HG0237260/HORVU.MOREX.r2.2HG0108030/HORVU.MOREX.r2.6HG0460860/HORVU.MOREX.r2.6HG0471070	15	Catalysis of the hydrolysis of internal, alpha-peptide bonds in a polypeptide chain.	MF	endopeptidase activity	R_cluster14
GO:0004298	Proteasome subunit alpha type	15/206	34/32782	9.3642e-25	1.14711e-22	9.31492e-23	HORVU.MOREX.r2.1HG0056110/HORVU.MOREX.r2.4HG0337290/HORVU.MOREX.r2.1HG0074920/HORVU.MOREX.r2.4HG0279770/HORVU.MOREX.r2.5HG0415180/HORVU.MOREX.r2.7HG0570790/HORVU.MOREX.r2.7HG0544550/HORVU.MOREX.r2.4HG0308660/HORVU.MOREX.r2.7HG0537870/HORVU.MOREX.r2.7HG0541070/HORVU.MOREX.r2.5HG0434930/HORVU.MOREX.r2.3HG0237260/HORVU.MOREX.r2.2HG0108030/HORVU.MOREX.r2.6HG0460860/HORVU.MOREX.r2.6HG0471070	15	Catalysis of the hydrolysis of internal peptide bonds in a polypeptide chain by a mechanism in which the hydroxyl group of a threonine residue at the active center acts as a nucleophile.	MF	threonine-type endopeptidase activity	R_cluster14
GO:0004721	Protein phosphatase 2c, putative	5/206	126/32782	0.00123218	0.0188677	0.0153211	HORVU.MOREX.r2.1HG0078260/HORVU.MOREX.r2.3HG0221890/HORVU.MOREX.r2.1HG0068730/HORVU.MOREX.r2.3HG0233390/HORVU.MOREX.r2.3HG0236180	5	Catalysis of the reaction: a phosphoprotein + H2O = a protein + phosphate. Together with protein kinases, these enzymes control the state of phosphorylation of cell proteins and thereby provide an important mechanism for regulating cellular activity.	MF	phosphoprotein phosphatase activity	R_cluster14
GO:0004775	F-box family protein	2/206	11/32782	0.00208213	0.0255061	0.0207117	HORVU.MOREX.r2.2HG0108460/HORVU.MOREX.r2.6HG0493950	2	Catalysis of the reaction: ATP + succinate + CoA = ADP + succinyl-CoA + phosphate.	MF	succinate-CoA ligase (ADP-forming) activity	R_cluster14
GO:0004834	LURP-one-like protein	2/206	13/32782	0.00292851	0.031195	0.0253313	HORVU.MOREX.r2.1HG0077030/HORVU.MOREX.r2.7HG0582550	2	Catalysis of the reaction: L-serine + (1S,2R)-1-C-(indol-3-yl)glycerol 3-phosphate = L-tryptophan + glyceraldehyde 3-phosphate + H2O.	MF	tryptophan synthase activity	R_cluster14
GO:0005839	Proteasome subunit alpha type	15/206	40/32782	1.9639e-23	1.20289e-21	9.76782e-22	HORVU.MOREX.r2.1HG0056110/HORVU.MOREX.r2.4HG0337290/HORVU.MOREX.r2.1HG0074920/HORVU.MOREX.r2.4HG0279770/HORVU.MOREX.r2.5HG0415180/HORVU.MOREX.r2.7HG0570790/HORVU.MOREX.r2.7HG0544550/HORVU.MOREX.r2.4HG0308660/HORVU.MOREX.r2.7HG0537870/HORVU.MOREX.r2.7HG0541070/HORVU.MOREX.r2.5HG0434930/HORVU.MOREX.r2.3HG0237260/HORVU.MOREX.r2.2HG0108030/HORVU.MOREX.r2.6HG0460860/HORVU.MOREX.r2.6HG0471070	15	A multisubunit barrel shaped endoprotease complex, which is the core of the proteasome complex.	CC	proteasome core complex	R_cluster14
GO:0005885	Actin-related protein 2/3 complex subunit 5	2/206	15/32782	0.00390977	0.0383157	0.0311135	HORVU.MOREX.r2.4HG0281020/HORVU.MOREX.r2.6HG0490130	2	A stable protein complex that contains two actin-related proteins, Arp2 and Arp3, and five novel proteins (ARPC1-5), and functions in the nucleation of branched actin filaments.	CC	Arp2/3 protein complex	R_cluster14
GO:0005985	Sucrose synthase	3/206	17/32782	0.000155826	0.00318145	0.00258343	HORVU.MOREX.r2.6HG0470810/HORVU.MOREX.r2.3HG0181790/HORVU.MOREX.r2.7HG0617910	3	The chemical reactions and pathways involving sucrose, the disaccharide fructofuranosyl-glucopyranoside.	BP	sucrose metabolic process	R_cluster14
GO:0006470	Protein phosphatase 2c, putative	5/206	169/32782	0.00439893	0.0403786	0.0327886	HORVU.MOREX.r2.1HG0078260/HORVU.MOREX.r2.3HG0221890/HORVU.MOREX.r2.1HG0068730/HORVU.MOREX.r2.3HG0233390/HORVU.MOREX.r2.3HG0236180	5	The process of removing one or more phosphoric residues from a protein.	BP	protein dephosphorylation	R_cluster14
GO:0006511	cDNA clone:J013058P10, full insert sequence	15/206	272/32782	2.33007e-10	8.15526e-09	6.62232e-09	HORVU.MOREX.r2.1HG0056110/HORVU.MOREX.r2.2HG0161350/HORVU.MOREX.r2.4HG0337290/HORVU.MOREX.r2.5HG0415180/HORVU.MOREX.r2.7HG0570790/HORVU.MOREX.r2.7HG0544550/HORVU.MOREX.r2.4HG0308660/HORVU.MOREX.r2.3HG0237260/HORVU.MOREX.r2.2HG0108030/HORVU.MOREX.r2.4HG0332910/HORVU.MOREX.r2.5HG0415950/HORVU.MOREX.r2.3HG0220940/HORVU.MOREX.r2.6HG0460860/HORVU.MOREX.r2.1HG0042030/HORVU.MOREX.r2.1HG0017460	15	The chemical reactions and pathways resulting in the breakdown of a protein or peptide by hydrolysis of its peptide bonds, initiated by the covalent attachment of a ubiquitin group, or multiple ubiquitin groups, to the protein.	BP	ubiquitin-dependent protein catabolic process	R_cluster14
GO:0006904	Vacuolar protein-sorting protein 33	2/206	18/32782	0.00562696	0.0475382	0.0386024	HORVU.MOREX.r2.2HG0128300/HORVU.MOREX.r2.6HG0483250	2	The initial attachment of a vesicle membrane to a target membrane, mediated by proteins protruding from the membrane of the vesicle and the target membrane, that contributes to exocytosis.	BP	vesicle docking involved in exocytosis	R_cluster14
GO:0007015	Glucan 1,3-beta-glucosidase	3/206	38/32782	0.00175431	0.0238781	0.0193897	HORVU.MOREX.r2.4HG0281020/HORVU.MOREX.r2.6HG0490130/HORVU.MOREX.r2.5HG0447340	3	A process that is carried out at the cellular level which results in the assembly, arrangement of constituent parts, or disassembly of cytoskeletal structures comprising actin filaments. Includes processes that control the spatial distribution of actin filaments, such as organizing filaments into meshworks, bundles, or other structures, as by cross-linking.	BP	actin filament organization	R_cluster14
GO:0016157	Sucrose synthase	3/206	16/32782	0.000128924	0.00287149	0.00233174	HORVU.MOREX.r2.6HG0470810/HORVU.MOREX.r2.3HG0181790/HORVU.MOREX.r2.7HG0617910	3	Catalysis of the reaction: UDP-glucose + D-fructose = UDP + sucrose.	MF	sucrose synthase activity	R_cluster14
GO:0016853	Peptidyl-prolyl cis-trans isomerase	10/206	407/32782	0.000274621	0.00517555	0.0042027	HORVU.MOREX.r2.3HG0229390/HORVU.MOREX.r2.3HG0191310/HORVU.MOREX.r2.4HG0280050/HORVU.MOREX.r2.5HG0414620/HORVU.MOREX.r2.7HG0566960/HORVU.MOREX.r2.5HG0408520/HORVU.MOREX.r2.1HG0019110/HORVU.MOREX.r2.1HG0052930/HORVU.MOREX.r2.2HG0177520/HORVU.MOREX.r2.7HG0554110	10	Catalysis of the geometric or structural changes within one molecule. Isomerase is the systematic name for any enzyme of EC class 5.	MF	isomerase activity	R_cluster14
GO:0019773	Proteasome subunit alpha type	9/206	22/32782	5.93885e-15	2.42503e-13	1.9692e-13	HORVU.MOREX.r2.1HG0056110/HORVU.MOREX.r2.4HG0337290/HORVU.MOREX.r2.5HG0415180/HORVU.MOREX.r2.7HG0570790/HORVU.MOREX.r2.7HG0544550/HORVU.MOREX.r2.4HG0308660/HORVU.MOREX.r2.3HG0237260/HORVU.MOREX.r2.2HG0108030/HORVU.MOREX.r2.6HG0460860	9	The proteasome core subcomplex that constitutes the two outer rings of the proteasome core complex. An example of this component is found in Mus musculus.	CC	proteasome core complex, alpha-subunit complex	R_cluster14
GO:0030163	Lon protease	5/206	63/32782	4.87912e-05	0.00146237	0.00118749	HORVU.MOREX.r2.6HG0520000/HORVU.MOREX.r2.6HG0515910/HORVU.MOREX.r2.7HG0597220/HORVU.MOREX.r2.2HG0088730/HORVU.MOREX.r2.6HG0474390	5	The chemical reactions and pathways resulting in the breakdown of a protein by the destruction of the native, active configuration, with or without the hydrolysis of peptide bonds.	BP	protein catabolic process	R_cluster14
GO:0030234	Nitrogen regulatory protein P-II-like protein	3/206	13/32782	6.67664e-05	0.00163578	0.0013283	HORVU.MOREX.r2.2HG0146120/HORVU.MOREX.r2.4HG0332910/HORVU.MOREX.r2.5HG0415950	3	Binds to and modulates the activity of an enzyme.	MF	enzyme regulator activity	R_cluster14
GO:0034314	Actin-related protein 2/3 complex subunit 5	2/206	16/32782	0.00444989	0.0403786	0.0327886	HORVU.MOREX.r2.4HG0281020/HORVU.MOREX.r2.6HG0490130	2	The actin nucleation process in which actin monomers combine to form a new branch on the side of an existing actin filament; mediated by the Arp2/3 protein complex and its interaction with other proteins.	BP	Arp2/3 complex-mediated actin nucleation	R_cluster14
GO:0042026	60 kDa chaperonin	3/206	30/32782	0.000876044	0.0143087	0.0116191	HORVU.MOREX.r2.4HG0338920/HORVU.MOREX.r2.5HG0447070/HORVU.MOREX.r2.2HG0084300	3	The process carried out by a cell that restores the biological activity of an unfolded or misfolded protein, using helper proteins such as chaperones.	BP	protein refolding	R_cluster14
GO:0043161	E3 ubiquitin-protein ligase	4/206	33/32782	5.37198e-05	0.00146237	0.00118749	HORVU.MOREX.r2.4HG0308660/HORVU.MOREX.r2.5HG0397220/HORVU.MOREX.r2.7HG0556350/HORVU.MOREX.r2.6HG0471070	4	The chemical reactions and pathways resulting in the breakdown of a protein or peptide by hydrolysis of its peptide bonds, initiated by the covalent attachment of ubiquitin, and mediated by the proteasome.	BP	proteasome-mediated ubiquitin-dependent protein catabolic process	R_cluster14
GO:0043248	Pentatricopeptide repeat-containing protein, putative	2/206	18/32782	0.00562696	0.0475382	0.0386024	HORVU.MOREX.r2.2HG0161350/HORVU.MOREX.r2.1HG0042030	2	The aggregation, arrangement and bonding together of a mature, active proteasome complex.	BP	proteasome assembly	R_cluster14
GO:0044183	60 kDa chaperonin	2/206	14/32782	0.0034025	0.0347338	0.0282049	HORVU.MOREX.r2.4HG0338920/HORVU.MOREX.r2.7HG0550830	2	Interacting selectively and non-covalently with any protein or protein complex (a complex of two or more proteins that may include other nonprotein molecules) that contributes to the process of protein folding.	MF	protein folding chaperone	R_cluster14
GO:0045492	Glucuronoxylan 4-O-methyltransferase	2/206	10/32782	0.00171063	0.0238781	0.0193897	HORVU.MOREX.r2.5HG0413010/HORVU.MOREX.r2.4HG0287430	2	The chemical reactions and pathways resulting in the formation of xylan, a polymer containing a beta-1,4-linked D-xylose backbone.	BP	xylan biosynthetic process	R_cluster14
GO:0050790	Nitrogen regulatory protein P-II-like protein	3/206	40/32782	0.00203575	0.0255061	0.0207117	HORVU.MOREX.r2.2HG0146120/HORVU.MOREX.r2.4HG0332910/HORVU.MOREX.r2.5HG0415950	3	Any process that modulates the activity of an enzyme.	BP	regulation of catalytic activity	R_cluster14
GO:0051013	Cytokinin riboside 5'-monophosphate phosphoribohydrolase	2/206	13/32782	0.00292851	0.031195	0.0253313	HORVU.MOREX.r2.7HG0592250/HORVU.MOREX.r2.6HG0478760	2	The process in which a microtubule is broken down into smaller segments. Severing enzymes remove dimers from the middle of the filament to create new ends, unlike depolymerizing kinesins that use ATP to uncap microtubules at their ends.	BP	microtubule severing	R_cluster14
GO:0051603	Proteasome subunit alpha type	15/206	38/32782	7.63671e-24	6.23665e-22	5.06434e-22	HORVU.MOREX.r2.1HG0056110/HORVU.MOREX.r2.4HG0337290/HORVU.MOREX.r2.1HG0074920/HORVU.MOREX.r2.4HG0279770/HORVU.MOREX.r2.5HG0415180/HORVU.MOREX.r2.7HG0570790/HORVU.MOREX.r2.7HG0544550/HORVU.MOREX.r2.4HG0308660/HORVU.MOREX.r2.7HG0537870/HORVU.MOREX.r2.7HG0541070/HORVU.MOREX.r2.5HG0434930/HORVU.MOREX.r2.3HG0237260/HORVU.MOREX.r2.2HG0108030/HORVU.MOREX.r2.6HG0460860/HORVU.MOREX.r2.6HG0471070	15	The hydrolysis of a peptide bond or bonds within a protein as part of the chemical reactions and pathways resulting in the breakdown of a protein by individual cells.	BP	proteolysis involved in cellular protein catabolic process	R_cluster14
GO:0000159	Serine/threonine protein phosphatase 2A regulatory subunit B	3/230	16/32782	0.000178434	0.00540654	0.00462049	HORVU.MOREX.r2.2HG0146130/HORVU.MOREX.r2.5HG0443250/HORVU.MOREX.r2.6HG0481070	3	A protein complex that has protein serine/threonine phosphatase activity that is polycation-stimulated (PCS), being directly stimulated by protamine, polylysine, or histone H1; it constitutes a subclass of several enzymes activated by different histones and polylysine, and consists of catalytic, scaffolding, and regulatory subunits. The catalytic and scaffolding subunits form the core enzyme, and…	CC	protein phosphatase type 2A complex	R_cluster1
GO:0000165	Receptor protein kinase, putative	4/230	72/32782	0.00167189	0.0316614	0.0270582	HORVU.MOREX.r2.1HG0040860/HORVU.MOREX.r2.7HG0602250/HORVU.MOREX.r2.4HG0320920/HORVU.MOREX.r2.1HG0015100	4	An intracellular protein kinase cascade containing at least a MAPK, a MAPKK and a MAP3K. The cascade can also contain an additional tiers: the upstream MAP4K. The kinases in each tier phosphorylate and activate the kinase in the downstream tier to transmit a signal within a cell.	BP	MAPK cascade	R_cluster1
GO:0004707	Mitogen-activated protein kinase	4/230	21/32782	1.28634e-05	0.000624887	0.000534035	HORVU.MOREX.r2.1HG0040860/HORVU.MOREX.r2.7HG0602250/HORVU.MOREX.r2.4HG0320920/HORVU.MOREX.r2.1HG0015100	4	Catalysis of the reaction: protein + ATP = protein phosphate + ADP. This reaction is the phosphorylation of proteins. Mitogen-activated protein kinase; a family of protein kinases that perform a crucial step in relaying signals from the plasma membrane to the nucleus. They are activated by a wide range of proliferation- or differentiation-inducing signals; activation is strong with agonists such …	MF	MAP kinase activity	R_cluster1
GO:0004721	Protein phosphatase 2c, putative	5/230	126/32782	0.00199786	0.0326418	0.0278961	HORVU.MOREX.r2.6HG0505960/HORVU.MOREX.r2.1HG0066210/HORVU.MOREX.r2.6HG0480120/HORVU.MOREX.r2.7HG0594080/HORVU.MOREX.r2.7HG0559890	5	Catalysis of the reaction: a phosphoprotein + H2O = a protein + phosphate. Together with protein kinases, these enzymes control the state of phosphorylation of cell proteins and thereby provide an important mechanism for regulating cellular activity.	MF	phosphoprotein phosphatase activity	R_cluster1
GO:0004725	F-box family protein	3/230	38/32782	0.00239915	0.0326418	0.0278961	HORVU.MOREX.r2.6HG0505960/HORVU.MOREX.r2.7HG0550270/HORVU.MOREX.r2.7HG0559890	3	Catalysis of the reaction: protein tyrosine phosphate + H2O = protein tyrosine + phosphate.	MF	protein tyrosine phosphatase activity	R_cluster1
GO:0004775	F-box family protein	2/230	11/32782	0.00258549	0.0326418	0.0278961	HORVU.MOREX.r2.4HG0299430/HORVU.MOREX.r2.5HG0366520	2	Catalysis of the reaction: ATP + succinate + CoA = ADP + succinyl-CoA + phosphate.	MF	succinate-CoA ligase (ADP-forming) activity	R_cluster1
GO:0005509	Protein kinase	13/230	436/32782	1.44363e-05	0.000624887	0.000534035	HORVU.MOREX.r2.1HG0071870/HORVU.MOREX.r2.3HG0226490/HORVU.MOREX.r2.3HG0268900/HORVU.MOREX.r2.7HG0617750/HORVU.MOREX.r2.5HG0359860/HORVU.MOREX.r2.7HG0617740/HORVU.MOREX.r2.5HG0359840/HORVU.MOREX.r2.5HG0373900/HORVU.MOREX.r2.1HG0033270/HORVU.MOREX.r2.4HG0316710/HORVU.MOREX.r2.2HG0090830/HORVU.MOREX.r2.5HG0440060/HORVU.MOREX.r2.6HG0501410	13	Interacting selectively and non-covalently with calcium ions (Ca2+).	MF	calcium ion binding	R_cluster1
GO:0005667	SKI family transcriptional corepressor 1	2/230	14/32782	0.00421891	0.0491665	0.0420183	HORVU.MOREX.r2.4HG0333510/HORVU.MOREX.r2.6HG0485390	2	A protein complex that is capable of associating with DNA by direct binding, or via other DNA-binding proteins or complexes, and regulating transcription.	CC	transcription regulator complex	R_cluster1
GO:0006099	Retrotransposon protein, putative, Ty1-copia subclass	4/230	66/32782	0.00121021	0.0261923	0.0223843	HORVU.MOREX.r2.6HG0461070/HORVU.MOREX.r2.1HG0067490/HORVU.MOREX.r2.4HG0299430/HORVU.MOREX.r2.5HG0366520	4	A nearly universal metabolic pathway in which the acetyl group of acetyl coenzyme A is effectively oxidized to two CO2 and four pairs of electrons are transferred to coenzymes. The acetyl group combines with oxaloacetate to form citrate, which undergoes successive transformations to isocitrate, 2-oxoglutarate, succinyl-CoA, succinate, fumarate, malate, and oxaloacetate again, thus completing the …	BP	tricarboxylic acid cycle	R_cluster1
GO:0006457	Peptidyl-prolyl cis-trans isomerase	8/230	182/32782	4.66332e-05	0.00156999	0.00134173	HORVU.MOREX.r2.5HG0406220/HORVU.MOREX.r2.2HG0163370/HORVU.MOREX.r2.5HG0368460/HORVU.MOREX.r2.6HG0492100/HORVU.MOREX.r2.1HG0025880/HORVU.MOREX.r2.4HG0347970/HORVU.MOREX.r2.5HG0429690/HORVU.MOREX.r2.5HG0440060	8	The process of assisting in the covalent and noncovalent assembly of single chain polypeptides or multisubunit complexes into the correct tertiary structure.	BP	protein folding	R_cluster1
GO:0006559	Phenylalanine ammonia-lyase	4/230	24/32782	2.24638e-05	0.000850817	0.000727118	HORVU.MOREX.r2.6HG0494410/HORVU.MOREX.r2.6HG0494420/HORVU.MOREX.r2.2HG0109440/HORVU.MOREX.r2.2HG0150540	4	The chemical reactions and pathways resulting in the breakdown of phenylalanine, 2-amino-3-phenylpropanoic acid.	BP	L-phenylalanine catabolic process	R_cluster1
GO:0006796	Inorganic pyrophosphatase family protein	2/230	10/32782	0.00212521	0.0326418	0.0278961	HORVU.MOREX.r2.1HG0061590/HORVU.MOREX.r2.1HG0062120	2	The chemical reactions and pathways involving the phosphate group, the anion or salt of any phosphoric acid.	BP	phosphate-containing compound metabolic process	R_cluster1
GO:0009698	Phenylalanine ammonia-lyase	4/230	17/32782	5.22937e-06	0.000528167	0.000451377	HORVU.MOREX.r2.6HG0494410/HORVU.MOREX.r2.6HG0494420/HORVU.MOREX.r2.2HG0109440/HORVU.MOREX.r2.2HG0150540	4	The chemical reactions and pathways involving aromatic derivatives of trans-cinnamic acid.	BP	phenylpropanoid metabolic process	R_cluster1
GO:0009723	Myb transcription factor	2/230	11/32782	0.00258549	0.0326418	0.0278961	HORVU.MOREX.r2.6HG0501040/HORVU.MOREX.r2.6HG0514200	2	Any process that results in a change in state or activity of a cell or an organism (in terms of movement, secretion, enzyme production, gene expression, etc.) as a result of an ethylene (ethene) stimulus.	BP	response to ethylene	R_cluster1
GO:0009800	Phenylalanine ammonia-lyase	4/230	17/32782	5.22937e-06	0.000528167	0.000451377	HORVU.MOREX.r2.6HG0494410/HORVU.MOREX.r2.6HG0494420/HORVU.MOREX.r2.2HG0109440/HORVU.MOREX.r2.2HG0150540	4	The chemical reactions and pathways resulting in the formation of cinnamic acid, 3-phenyl-2-propenoic acid.	BP	cinnamic acid biosynthetic process	R_cluster1
GO:0015450	Protein transport protein Sec61 subunit gamma	2/230	10/32782	0.00212521	0.0326418	0.0278961	HORVU.MOREX.r2.4HG0327040/HORVU.MOREX.r2.4HG0323420	2	Primary active carrier-mediated transport of a protein across a membrane, driven by the hydrolysis of the diphosphate bond of inorganic pyrophosphate, ATP, or another nucleoside triphosphate. The transport protein may or may not be transiently phosphorylated, but the substrate is not phosphorylated.	MF	P-P-bond-hydrolysis-driven protein transmembrane transporter activity	R_cluster1
GO:0016567	U-box domain-containing protein 1	8/230	304/32782	0.00145547	0.0294005	0.025126	HORVU.MOREX.r2.2HG0137960/HORVU.MOREX.r2.6HG0521380/HORVU.MOREX.r2.6HG0521570/HORVU.MOREX.r2.3HG0250080/HORVU.MOREX.r2.7HG0590210/HORVU.MOREX.r2.3HG0207340/HORVU.MOREX.r2.2HG0146780/HORVU.MOREX.r2.3HG0207310	8	The process in which one or more ubiquitin groups are added to a protein.	BP	protein ubiquitination	R_cluster1
GO:0016791	F-box family protein	4/230	79/32782	0.00235039	0.0326418	0.0278961	HORVU.MOREX.r2.6HG0505960/HORVU.MOREX.r2.7HG0550270/HORVU.MOREX.r2.3HG0230400/HORVU.MOREX.r2.7HG0559890	4	Catalysis of the hydrolysis of phosphoric monoesters, releasing inorganic phosphate.	MF	phosphatase activity	R_cluster1
GO:0016841	Phenylalanine ammonia-lyase	4/230	20/32782	1.04708e-05	0.000624887	0.000534035	HORVU.MOREX.r2.6HG0494410/HORVU.MOREX.r2.6HG0494420/HORVU.MOREX.r2.2HG0109440/HORVU.MOREX.r2.2HG0150540	4	Catalysis of the release of ammonia by the cleavage of a carbon-nitrogen bond or the reverse reaction with ammonia as a substrate.	MF	ammonia-lyase activity	R_cluster1
GO:0019888	Serine/threonine protein phosphatase 2A regulatory subunit B	3/230	20/32782	0.000355787	0.00980033	0.00837547	HORVU.MOREX.r2.2HG0146130/HORVU.MOREX.r2.5HG0443250/HORVU.MOREX.r2.6HG0481070	3	Modulates the activity of a protein phosphatase, an enzyme which catalyzes of the removal of a phosphate group from a protein substrate molecule.	MF	protein phosphatase regulator activity	R_cluster1
GO:0035335	F-box family protein	3/230	38/32782	0.00239915	0.0326418	0.0278961	HORVU.MOREX.r2.6HG0505960/HORVU.MOREX.r2.7HG0550270/HORVU.MOREX.r2.7HG0559890	3	The removal of phosphoric residues from peptidyl-O-phospho-tyrosine to form peptidyl-tyrosine.	BP	peptidyl-tyrosine dephosphorylation	R_cluster1
GO:0042393	PHD finger alfin-like protein	3/230	30/32782	0.00120325	0.0261923	0.0223843	HORVU.MOREX.r2.3HG0256210/HORVU.MOREX.r2.4HG0287210/HORVU.MOREX.r2.5HG0436960	3	Interacting selectively and non-covalently with a histone, any of a group of water-soluble proteins found in association with the DNA of eukaroytic chromosomes. They are involved in the condensation and coiling of chromosomes during cell division and have also been implicated in nonspecific suppression of gene activity.	MF	histone binding	R_cluster1
GO:0043666	Peptidyl-prolyl cis-trans isomerase	3/230	29/32782	0.00108853	0.0261923	0.0223843	HORVU.MOREX.r2.2HG0146130/HORVU.MOREX.r2.5HG0443250/HORVU.MOREX.r2.6HG0481070	3	Any process that modulates the frequency, rate or extent of phosphoprotein phosphatase activity, the catalysis of the hydrolysis of phosphate from a phosphoprotein.	BP	regulation of phosphoprotein phosphatase activity	R_cluster1
GO:0045548	Phenylalanine ammonia-lyase	4/230	17/32782	5.22937e-06	0.000528167	0.000451377	HORVU.MOREX.r2.6HG0494410/HORVU.MOREX.r2.6HG0494420/HORVU.MOREX.r2.2HG0109440/HORVU.MOREX.r2.2HG0150540	4	Catalysis of the reaction: L-phenylalanine = NH(4)(+) + trans-cinnamate.	MF	phenylalanine ammonia-lyase activity	R_cluster1
GO:0051082	2-oxoglutarate (2OG) and Fe(II)-dependent oxygenase superfamily protein	7/230	107/32782	1.09832e-05	0.000624887	0.000534035	HORVU.MOREX.r2.5HG0406220/HORVU.MOREX.r2.2HG0163370/HORVU.MOREX.r2.5HG0368460/HORVU.MOREX.r2.1HG0025880/HORVU.MOREX.r2.4HG0347970/HORVU.MOREX.r2.5HG0429690/HORVU.MOREX.r2.5HG0440060	7	Interacting selectively and non-covalently with an unfolded protein.	MF	unfolded protein binding	R_cluster1
GO:0071806	Protein transport protein Sec61 subunit gamma	2/230	13/32782	0.00363295	0.0440313	0.0376297	HORVU.MOREX.r2.4HG0327040/HORVU.MOREX.r2.4HG0323420	2	The process in which a protein is transported across a membrane.	BP	protein transmembrane transport	R_cluster1
GO:0003713	F-box family protein	44220	14/32782	0.0102029	0.0357102	0.0161099	HORVU.MOREX.r2.5HG0411510	1	A protein or a member of a complex that interacts specifically and non-covalently with a DNA-bound DNA-binding transcription factor to activate the transcription of specific genes. Coactivators often act by altering chromatin structure and modifications. For example, one class of transcription coregulators modifies chromatin structure through covalent modification of histones. A second ATP-depend…	MF	transcription coactivator activity	R_cluster11
GO:0004707	Mitogen-activated protein kinase	44220	21/32782	0.0152669	0.0411031	0.0185428	HORVU.MOREX.r2.1HG0075930	1	Catalysis of the reaction: protein + ATP = protein phosphate + ADP. This reaction is the phosphorylation of proteins. Mitogen-activated protein kinase; a family of protein kinases that perform a crucial step in relaying signals from the plasma membrane to the nucleus. They are activated by a wide range of proliferation- or differentiation-inducing signals; activation is strong with agonists such …	MF	MAP kinase activity	R_cluster11
GO:0005623	Dihydrolipoyl dehydrogenase	44251	204/32782	0.00971964	0.0357102	0.0161099	HORVU.MOREX.r2.5HG0385760/HORVU.MOREX.r2.3HG0200290	2	The basic structural and functional unit of all organisms. Includes the plasma membrane and any external encapsulating structures such as the cell wall and cell envelope.	CC	cell	R_cluster11
GO:0006606	Importin subunit alpha	44220	14/32782	0.0102029	0.0357102	0.0161099	HORVU.MOREX.r2.3HG0209860	1	The directed movement of a protein from the cytoplasm to the nucleus.	BP	protein import into nucleus	R_cluster11
GO:0008565	Transducin/WD-like repeat-protein	44220	32/32782	0.0231744	0.047712	0.0215242	HORVU.MOREX.r2.3HG0209860	1	NA	NA	NA	R_cluster11
GO:0009055	Cytochrome b	44251	297/32782	0.0197993	0.0469214	0.0211675	HORVU.MOREX.r2.5HG0385760/HORVU.MOREX.r2.3HG0200290	2	Any molecular entity that serves as an electron acceptor and electron donor in an electron transport chain. An electron transport chain is a process in which a series of electron carriers operate together to transfer electrons from donors to any of several different terminal electron acceptors to generate a transmembrane electrochemical gradient.	MF	electron transfer activity	R_cluster11
GO:0009705	F-box protein	44220	17/32782	0.0123762	0.0360973	0.0162845	HORVU.MOREX.r2.5HG0423400	1	The lipid bilayer surrounding a vacuole that retains the same shape regardless of cell cycle phase. The membrane separates its contents from the cytoplasm of the cell. An example of this component is found in Arabidopsis thaliana.	CC	plant-type vacuole membrane	R_cluster11
GO:0009725	Auxin response factor	44251	48/32782	0.000567619	0.00993333	0.0044812	HORVU.MOREX.r2.7HG0549250/HORVU.MOREX.r2.7HG0609910	2	Any process that results in a change in state or activity of a cell or an organism (in terms of movement, secretion, enzyme production, gene expression, etc.) as a result of a hormone stimulus.	BP	response to hormone	R_cluster11
GO:0009734	Transport inhibitor response 1	44371	82/32782	2.63918e-11	9.23713e-10	4.16713e-10	HORVU.MOREX.r2.7HG0549250/HORVU.MOREX.r2.7HG0589900/HORVU.MOREX.r2.5HG0360110/HORVU.MOREX.r2.5HG0432000/HORVU.MOREX.r2.5HG0360080/HORVU.MOREX.r2.7HG0609910	6	A series of molecular signals generated by the binding of the plant hormone auxin to a receptor, and ending with modulation of a downstream cellular process, e.g. transcription.	BP	auxin-activated signaling pathway	R_cluster11
GO:0015035	Glutaredoxin	44251	116/32782	0.00325606	0.0357102	0.0161099	HORVU.MOREX.r2.5HG0385760/HORVU.MOREX.r2.3HG0200290	2	Catalysis of the reaction: a protein with reduced sulfide groups = a protein with oxidized disulfide bonds.	MF	protein disulfide oxidoreductase activity	R_cluster11
GO:0015914	Phospholipid-transporting ATPase	44220	17/32782	0.0123762	0.0360973	0.0162845	HORVU.MOREX.r2.5HG0422780	1	The directed movement of phospholipids into, out of or within a cell, or between cells, by means of some agent such as a transporter or pore. Phospholipids are any lipids containing phosphoric acid as a mono- or diester.	BP	phospholipid transport	R_cluster11
GO:0022900	Dihydrolipoyl dehydrogenase	44251	310/32782	0.0214498	0.0469214	0.0211675	HORVU.MOREX.r2.5HG0385760/HORVU.MOREX.r2.3HG0200290	2	A process in which a series of electron carriers operate together to transfer electrons from donors to any of several different terminal electron acceptors to generate a transmembrane electrochemical gradient.	BP	electron transport chain	R_cluster11
GO:0031625	Cullin-1	44220	29/32782	0.0210239	0.0469214	0.0211675	HORVU.MOREX.r2.5HG0349230	1	Interacting selectively and non-covalently with a ubiquitin protein ligase enzyme, any of the E3 proteins.	MF	ubiquitin protein ligase binding	R_cluster11
GO:0045332	Phospholipid-transporting ATPase	44220	12/32782	0.00875148	0.0357102	0.0161099	HORVU.MOREX.r2.5HG0422780	1	The movement of a phospholipid molecule from one leaflet of a membrane bilayer to the opposite leaflet.	BP	phospholipid translocation	R_cluster11
GO:0045454	Dihydrolipoyl dehydrogenase	44251	188/32782	0.00831023	0.0357102	0.0161099	HORVU.MOREX.r2.5HG0385760/HORVU.MOREX.r2.3HG0200290	2	Any process that maintains the redox environment of a cell or compartment within a cell.	BP	cell redox homeostasis	R_cluster11
GO:0061608	Importin subunit alpha	44220	10/32782	0.00729802	0.0357102	0.0161099	HORVU.MOREX.r2.3HG0209860	1	Combining with a nuclear import signal (NIS) on a cargo to be transported, to mediate transport of the cargo through the nuclear pore, from the cytoplasm to the nuclear lumen. The cargo can be either a RNA or a protein.	MF	nuclear import signal receptor activity	R_cluster11
GO:0000027	Glioma tumor suppressor-like protein	4/315	26/32782	0.000105815	0.00208984	0.00193994	HORVU.MOREX.r2.3HG0201870/HORVU.MOREX.r2.1HG0024100/HORVU.MOREX.r2.5HG0354740/HORVU.MOREX.r2.1HG0030900	4	The aggregation, arrangement and bonding together of constituent RNAs and proteins to form the large ribosomal subunit.	BP	ribosomal large subunit assembly	R_cluster15
GO:0000154	S-locus lectin protein kinase family protein	3/315	24/32782	0.00153141	0.0226839	0.0210568	HORVU.MOREX.r2.4HG0332760/HORVU.MOREX.r2.1HG0069590/HORVU.MOREX.r2.2HG0095540	3	The covalent alteration of one or more nucleotides within an rRNA molecule to produce an rRNA molecule with a sequence that differs from that coded genetically.	BP	rRNA modification	R_cluster15
GO:0005643	Nuclear pore complex protein Nup107	4/315	42/32782	0.000702069	0.011885	0.0110325	HORVU.MOREX.r2.3HG0251150/HORVU.MOREX.r2.2HG0120940/HORVU.MOREX.r2.1HG0007670/HORVU.MOREX.r2.4HG0328930	4	Any of the numerous similar discrete openings in the nuclear envelope of a eukaryotic cell, where the inner and outer nuclear membranes are joined.	CC	nuclear pore	R_cluster15
GO:0005730	ATP-dependent RNA helicase dbp3	22/315	135/32782	8.02626e-21	1.90222e-18	1.76578e-18	HORVU.MOREX.r2.2HG0098990/HORVU.MOREX.r2.3HG0236190/HORVU.MOREX.r2.4HG0314300/HORVU.MOREX.r2.4HG0279970/HORVU.MOREX.r2.5HG0369750/HORVU.MOREX.r2.7HG0549020/HORVU.MOREX.r2.7HG0619910/HORVU.MOREX.r2.6HG0507260/HORVU.MOREX.r2.5HG0419700/HORVU.MOREX.r2.2HG0105280/HORVU.MOREX.r2.1HG0065910/HORVU.MOREX.r2.5HG0356470/HORVU.MOREX.r2.5HG0376250/HORVU.MOREX.r2.5HG0440720/HORVU.MOREX.r2.4HG0332760/HORVU.MOR…	22	A small, dense body one or more of which are present in the nucleus of eukaryotic cells. It is rich in RNA and protein, is not bounded by a limiting membrane, and is not seen during mitosis. Its prime function is the transcription of the nucleolar DNA into 45S ribosomal-precursor RNA, the processing of this RNA into 5.8S, 18S, and 28S components of ribosomal RNA, and the association of these comp…	CC	nucleolus	R_cluster15
GO:0006364	ATP-dependent RNA helicase dbp3	17/315	141/32782	3.99206e-14	1.57686e-12	1.46375e-12	HORVU.MOREX.r2.3HG0236190/HORVU.MOREX.r2.5HG0431990/HORVU.MOREX.r2.4HG0279970/HORVU.MOREX.r2.7HG0588940/HORVU.MOREX.r2.2HG0173950/HORVU.MOREX.r2.7HG0619910/HORVU.MOREX.r2.5HG0419700/HORVU.MOREX.r2.6HG0506700/HORVU.MOREX.r2.2HG0105280/HORVU.MOREX.r2.5HG0356470/HORVU.MOREX.r2.4HG0332760/HORVU.MOREX.r2.7HG0612250/HORVU.MOREX.r2.6HG0523600/HORVU.MOREX.r2.7HG0617800/HORVU.MOREX.r2.4HG0309240/HORVU.MOR…	17	Any process involved in the conversion of a primary ribosomal RNA (rRNA) transcript into one or more mature rRNA molecules.	BP	rRNA processing	R_cluster15
GO:0006913	Nuclear pore complex protein Nup107	4/315	48/32782	0.0011666	0.0184323	0.0171102	HORVU.MOREX.r2.1HG0049370/HORVU.MOREX.r2.3HG0251150/HORVU.MOREX.r2.1HG0007670/HORVU.MOREX.r2.4HG0328930	4	The directed movement of molecules between the nucleus and the cytoplasm.	BP	nucleocytoplasmic transport	R_cluster15
GO:0015934	50S ribosomal protein L2, putative	7/315	72/32782	6.10689e-06	0.000131576	0.000122138	HORVU.MOREX.r2.5HG0389360/HORVU.MOREX.r2.7HG0567650/HORVU.MOREX.r2.3HG0202480/HORVU.MOREX.r2.2HG0129270/HORVU.MOREX.r2.7HG0572270/HORVU.MOREX.r2.3HG0250830/HORVU.MOREX.r2.1HG0070950	7	The larger of the two subunits of a ribosome. Two sites on the ribosomal large subunit are involved in translation, namely the aminoacyl site (A site) and peptidyl site (P site).	CC	large ribosomal subunit	R_cluster15
GO:0015935	30S ribosomal protein S4	16/315	70/32782	5.60213e-18	3.31926e-16	3.08117e-16	HORVU.MOREX.r2.5HG0437010/HORVU.MOREX.r2.1HG0058860/HORVU.MOREX.r2.5HG0401170/HORVU.MOREX.r2.2HG0103970/HORVU.MOREX.r2.2HG0100920/HORVU.MOREX.r2.5HG0378380/HORVU.MOREX.r2.3HG0192970/HORVU.MOREX.r2.7HG0577670/HORVU.MOREX.r2.3HG0253300/HORVU.MOREX.r2.3HG0252280/HORVU.MOREX.r2.4HG0337610/HORVU.MOREX.r2.7HG0545050/HORVU.MOREX.r2.5HG0354630/HORVU.MOREX.r2.7HG0535840/HORVU.MOREX.r2.2HG0167620/HORVU.MOR…	16	The smaller of the two subunits of a ribosome.	CC	small ribosomal subunit	R_cluster15
GO:0017056	Nuclear pore complex protein Nup107	3/315	28/32782	0.0024094	0.0335898	0.0311804	HORVU.MOREX.r2.3HG0251150/HORVU.MOREX.r2.1HG0007670/HORVU.MOREX.r2.4HG0328930	3	The action of a molecule that contributes to the structural integrity of the nuclear pore complex, a protein-lined channel in the nuclear envelope that allows the transfer of macromolecules.	MF	structural constituent of nuclear pore	R_cluster15
GO:0019843	P-loop containing nucleoside triphosphate hydrolases superfamily protein	26/315	246/32782	1.73951e-19	2.06132e-17	1.91346e-17	HORVU.MOREX.r2.5HG0437010/HORVU.MOREX.r2.3HG0182650/HORVU.MOREX.r2.2HG0158350/HORVU.MOREX.r2.1HG0058860/HORVU.MOREX.r2.5HG0401170/HORVU.MOREX.r2.7HG0528960/HORVU.MOREX.r2.2HG0103970/HORVU.MOREX.r2.3HG0182620/HORVU.MOREX.r2.3HG0201870/HORVU.MOREX.r2.1HG0024100/HORVU.MOREX.r2.5HG0389360/HORVU.MOREX.r2.2HG0100920/HORVU.MOREX.r2.5HG0378380/HORVU.MOREX.r2.7HG0567650/HORVU.MOREX.r2.3HG0202480/HORVU.MOR…	26	Interacting selectively and non-covalently with ribosomal RNA.	MF	rRNA binding	R_cluster15
GO:0022625	60S ribosomal protein L27	5/315	15/32782	2.2023e-07	5.79939e-06	5.3834e-06	HORVU.MOREX.r2.3HG0201870/HORVU.MOREX.r2.1HG0024100/HORVU.MOREX.r2.4HG0314500/HORVU.MOREX.r2.2HG0092650/HORVU.MOREX.r2.5HG0354740	5	The large subunit of a ribosome located in the cytosol.	CC	cytosolic large ribosomal subunit	R_cluster15
GO:0022627	40S ribosomal protein S3a	5/315	11/32782	3.49694e-08	1.03597e-06	9.61659e-07	HORVU.MOREX.r2.4HG0331970/HORVU.MOREX.r2.1HG0026750/HORVU.MOREX.r2.7HG0595620/HORVU.MOREX.r2.4HG0337610/HORVU.MOREX.r2.1HG0034290	5	The small subunit of a ribosome located in the cytosol.	CC	cytosolic small ribosomal subunit	R_cluster15
GO:0030687	ATP-dependent RNA helicase dbp3	4/315	11/32782	2.61727e-06	6.20292e-05	5.75798e-05	HORVU.MOREX.r2.4HG0280470/HORVU.MOREX.r2.4HG0279970/HORVU.MOREX.r2.5HG0419700/HORVU.MOREX.r2.2HG0105280	4	A preribosomal complex consisting of 27SA, 27SB, and/or 7S pre-rRNA, 5S rRNA, ribosomal proteins including late-associating large subunit proteins, and associated proteins; a precursor of the eukaryotic cytoplasmic large ribosomal subunit.	CC	preribosome, large subunit precursor	R_cluster15
GO:0032040	BTB/POZ/MATH-domain protein	10/315	25/32782	1.67387e-14	7.93413e-13	7.36502e-13	HORVU.MOREX.r2.7HG0588940/HORVU.MOREX.r2.5HG0356470/HORVU.MOREX.r2.5HG0409330/HORVU.MOREX.r2.1HG0069590/HORVU.MOREX.r2.5HG0363580/HORVU.MOREX.r2.7HG0617800/HORVU.MOREX.r2.2HG0095540/HORVU.MOREX.r2.7HG0613950/HORVU.MOREX.r2.3HG0246350/HORVU.MOREX.r2.7HG0542740	10	A large ribonucleoprotein complex that is an early preribosomal complex. In S. cerevisiae, it has a size of 80S and consists of the 35S pre-rRNA, early-associating ribosomal proteins most of which are part of the small ribosomal subunit, the U3 snoRNA and associated proteins.	CC	small-subunit processome	R_cluster15
GO:0042254	ATP-dependent RNA helicase dbp3	17/315	72/32782	2.77067e-19	2.18883e-17	2.03183e-17	HORVU.MOREX.r2.5HG0409860/HORVU.MOREX.r2.7HG0568170/HORVU.MOREX.r2.2HG0098990/HORVU.MOREX.r2.3HG0236190/HORVU.MOREX.r2.4HG0279970/HORVU.MOREX.r2.7HG0549020/HORVU.MOREX.r2.5HG0419700/HORVU.MOREX.r2.2HG0105280/HORVU.MOREX.r2.7HG0582810/HORVU.MOREX.r2.5HG0440720/HORVU.MOREX.r2.7HG0591270/HORVU.MOREX.r2.5HG0385560/HORVU.MOREX.r2.6HG0458680/HORVU.MOREX.r2.1HG0009950/HORVU.MOREX.r2.4HG0309240/HORVU.MOR…	17	A cellular process that results in the biosynthesis of constituent macromolecules, assembly, and arrangement of constituent parts of ribosome subunits; includes transport to the sites of protein synthesis.	BP	ribosome biogenesis	R_cluster15
GO:0042273	Eukaryotic translation initiation factor 6	5/315	10/32782	1.92256e-08	6.50924e-07	6.04233e-07	HORVU.MOREX.r2.2HG0098990/HORVU.MOREX.r2.4HG0279970/HORVU.MOREX.r2.2HG0165560/HORVU.MOREX.r2.5HG0419700/HORVU.MOREX.r2.2HG0105280	5	A cellular process that results in the biosynthesis of constituent macromolecules, assembly, and arrangement of constituent parts of a large ribosomal subunit; includes transport to the sites of protein synthesis.	BP	ribosomal large subunit biogenesis	R_cluster15
GO:1990904	DNA topoisomerase 2-alpha	3/315	17/32782	0.000540751	0.0098583	0.00915117	HORVU.MOREX.r2.5HG0409860/HORVU.MOREX.r2.7HG0568170/HORVU.MOREX.r2.4HG0326920	3	NA	CC	ribonucleoprotein complex	R_cluster15
GO:0003756	F-box family protein	44238	10/32782	4.59951e-06	0.000142585	4.35743e-05	HORVU.MOREX.r2.4HG0289350/HORVU.MOREX.r2.4HG0283660	2	Catalysis of the rearrangement of both intrachain and interchain disulfide bonds in proteins.	MF	protein disulfide isomerase activity	R_cluster9
GO:0004617	D-3-phosphoglycerate dehydrogenase	44207	31/32782	0.0103546	0.0220864	0.00674966	HORVU.MOREX.r2.2HG0169770	1	Catalysis of the reaction: 3-phosphoglycerate + NAD+ = 3-phosphohydroxypyruvate + NADH + H+.	MF	phosphoglycerate dehydrogenase activity	R_cluster9
GO:0005783	transmembrane protein, putative (DUF247)	44238	313/32782	0.0047215	0.0207439	0.00633939	HORVU.MOREX.r2.4HG0289350/HORVU.MOREX.r2.4HG0283660	2	The irregular network of unit membranes, visible only by electron microscopy, that occurs in the cytoplasm of many eukaryotic cells. The membranes form a complex meshwork of tubular channels, which are often expanded into slitlike cavities called cisternae. The ER takes two forms, rough (or granular), with ribosomes adhering to the outer surface, and smooth (with no ribosomes attached).	CC	endoplasmic reticulum	R_cluster9
GO:0006526	Argininosuccinate synthase	44207	32/32782	0.010687	0.0220864	0.00674966	HORVU.MOREX.r2.4HG0286260	1	The chemical reactions and pathways resulting in the formation of arginine, 2-amino-5-(carbamimidamido)pentanoic acid.	BP	arginine biosynthetic process	R_cluster9
GO:0006564	D-3-phosphoglycerate dehydrogenase	44207	35/32782	0.0116835	0.0226368	0.00691788	HORVU.MOREX.r2.2HG0169770	1	The chemical reactions and pathways resulting in the formation of L-serine, the L-enantiomer of serine, i.e. (2S)-2-amino-3-hydroxypropanoic acid.	BP	L-serine biosynthetic process	R_cluster9
GO:0006749	Glutathione S-transferase	44207	19/32782	0.00635797	0.0207439	0.00633939	HORVU.MOREX.r2.4HG0335030	1	The chemical reactions and pathways involving glutathione, the tripeptide glutamylcysteinylglycine, which acts as a coenzyme for some enzymes and as an antioxidant in the protection of sulfhydryl groups in enzymes and other proteins; it has a specific role in the reduction of hydrogen peroxide (H2O2) and oxidized ascorbate, and it participates in the gamma-glutamyl cycle.	BP	glutathione metabolic process	R_cluster9
GO:0008615	Pyridoxine/pyridoxamine 5'-phosphate oxidase	44207	17/32782	0.00569045	0.0207439	0.00633939	HORVU.MOREX.r2.6HG0495400	1	The chemical reactions and pathways resulting in the formation of pyridoxine, 2-methyl-3-hydroxy-4,5-bis(hydroxymethyl)pyridine, one of the vitamin B6 compounds.	BP	pyridoxine biosynthetic process	R_cluster9
GO:0008652	D-3-phosphoglycerate dehydrogenase	44266	264/32782	8.12261e-05	0.001259	0.000384755	HORVU.MOREX.r2.4HG0325400/HORVU.MOREX.r2.4HG0286260/HORVU.MOREX.r2.2HG0169770	3	The chemical reactions and pathways resulting in the formation of amino acids, organic acids containing one or more amino substituents.	BP	cellular amino acid biosynthetic process	R_cluster9
GO:0009073	LURP-one-like protein	44207	39/32782	0.0130109	0.0237257	0.00725063	HORVU.MOREX.r2.4HG0325400	1	The chemical reactions and pathways resulting in the formation of aromatic amino acid family, amino acids with aromatic ring (phenylalanine, tyrosine, tryptophan).	BP	aromatic amino acid family biosynthetic process	R_cluster9
GO:0009423	Phospho-2-dehydro-3-deoxyheptonate aldolase	44207	18/32782	0.00602426	0.0207439	0.00633939	HORVU.MOREX.r2.4HG0325400	1	The chemical reactions and pathways resulting in the formation of the unsymmetrical ether derived from phosphoenolpyruvate and 5-phosphoshikimic acid formed as an intermediate in the biosynthesis of aromatic amino acids and many other compounds.	BP	chorismate biosynthetic process	R_cluster9
GO:0010181	12-oxophytodienoate reductase-like protein	44207	63/32782	0.0209409	0.0347037	0.0106055	HORVU.MOREX.r2.6HG0495400	1	Interacting selectively and non-covalently with flavin mono nucleotide. Flavin mono nucleotide (FMN) is the coenzyme or the prosthetic group of various flavoprotein oxidoreductase enzymes.	MF	FMN binding	R_cluster9
GO:0016620	Aldehyde dehydrogenase	44207	64/32782	0.02127	0.0347037	0.0106055	HORVU.MOREX.r2.4HG0286260	1	Catalysis of an oxidation-reduction (redox) reaction in which an aldehyde or ketone (oxo) group acts as a hydrogen or electron donor and reduces NAD or NADP.	MF	oxidoreductase activity, acting on the aldehyde or oxo group of donors, NAD or NADP as acceptor	R_cluster9
GO:0016671	Peptide methionine sulfoxide reductase MsrB	44207	12/32782	0.00401985	0.0207439	0.00633939	HORVU.MOREX.r2.4HG0283660	1	Catalysis of an oxidation-reduction (redox) reaction in which a sulfur-containing group acts as a hydrogen or electron donor and reduces disulfide.	MF	oxidoreductase activity, acting on a sulfur group of donors, disulfide as acceptor	R_cluster9
GO:0016853	Peptidyl-prolyl cis-trans isomerase	44238	407/32782	0.0078529	0.0215188	0.0065762	HORVU.MOREX.r2.4HG0289350/HORVU.MOREX.r2.6HG0495400	2	Catalysis of the geometric or structural changes within one molecule. Isomerase is the systematic name for any enzyme of EC class 5.	MF	isomerase activity	R_cluster9
GO:0035999	DNA/RNA helicase protein	44207	27/32782	0.009024	0.0215188	0.0065762	HORVU.MOREX.r2.5HG0436080	1	The chemical reactions and pathways by which one-carbon (C1) units are transferred between tetrahydrofolate molecules, to synthesise other tetrahydrofolate molecules.	BP	tetrahydrofolate interconversion	R_cluster9
GO:0042823	Pyridoxine/pyridoxamine 5'-phosphate oxidase	44207	25/32782	0.00835811	0.0215188	0.0065762	HORVU.MOREX.r2.6HG0495400	1	The chemical reactions and pathways resulting in the formation of pyridoxal phosphate, pyridoxal phosphorylated at the hydroxymethyl group of C-5, the active form of vitamin B6.	BP	pyridoxal phosphate biosynthetic process	R_cluster9
GO:0045454	Dihydrolipoyl dehydrogenase	44238	188/32782	0.00173907	0.0134778	0.00411886	HORVU.MOREX.r2.4HG0335030/HORVU.MOREX.r2.4HG0289350	2	Any process that maintains the redox environment of a cell or compartment within a cell.	BP	cell redox homeostasis	R_cluster9
GO:0048037	Pyridoxine/pyridoxamine 5'-phosphate oxidase	44207	20/32782	0.00669158	0.0207439	0.00633939	HORVU.MOREX.r2.6HG0495400	1	Interacting selectively and non-covalently with a cofactor, a substance that is required for the activity of an enzyme or other protein. Cofactors may be inorganic, such as the metal atoms zinc, iron, and copper in certain forms, or organic, in which case they are referred to as coenzymes. Cofactors may either be bound tightly to active sites or bind loosely with the substrate.	MF	cofactor binding	R_cluster9
GO:0051287	D-3-phosphoglycerate dehydrogenase	44238	187/32782	0.00172089	0.0134778	0.00411886	HORVU.MOREX.r2.4HG0286260/HORVU.MOREX.r2.2HG0169770	2	Interacting selectively and non-covalently with nicotinamide adenine dinucleotide, a coenzyme involved in many redox and biosynthetic reactions; binding may be to either the oxidized form, NAD+, or the reduced form, NADH.	MF	NAD binding	R_cluster9
GO:0004713	Receptor-like kinase protein	12086	32/32782	0.000478275	0.00876838	0.00537011	HORVU.MOREX.r2.5HG0383160/HORVU.MOREX.r2.3HG0255360	2	Catalysis of the reaction: ATP + a protein tyrosine = ADP + protein tyrosine phosphate.	MF	protein tyrosine kinase activity	R_cluster20
GO:0007169	Serine/threonine protein phosphatase 7 long form isogeny	12086	10/32782	4.39975e-05	0.00145368	0.000890291	HORVU.MOREX.r2.5HG0383160/HORVU.MOREX.r2.3HG0255360	2	A series of molecular signals initiated by the binding of an extracellular ligand to a receptor on the surface of the target cell where the receptor possesses tyrosine kinase activity, and ending with regulation of a downstream cellular process, e.g. transcription.	BP	transmembrane receptor protein tyrosine kinase signaling pathway	R_cluster20
GO:0015934	50S ribosomal protein L2, putative	12114	72/32782	5.2861e-05	0.00145368	0.000890291	HORVU.MOREX.r2.1HG0003070/HORVU.MOREX.r2.3HG0232100/HORVU.MOREX.r2.7HG0596370	3	The larger of the two subunits of a ribosome. Two sites on the ribosomal large subunit are involved in translation, namely the aminoacyl site (A site) and peptidyl site (P site).	CC	large ribosomal subunit	R_cluster20
GO:0018108	Receptor-like kinase protein	12086	84/32782	0.00325331	0.0357864	0.021917	HORVU.MOREX.r2.5HG0383160/HORVU.MOREX.r2.3HG0255360	2	The phosphorylation of peptidyl-tyrosine to form peptidyl-O4'-phospho-L-tyrosine.	BP	peptidyl-tyrosine phosphorylation	R_cluster20
GO:0019843	P-loop containing nucleoside triphosphate hydrolases superfamily protein	12114	246/32782	0.00192855	0.0265175	0.0162404	HORVU.MOREX.r2.1HG0067540/HORVU.MOREX.r2.3HG0204940/HORVU.MOREX.r2.3HG0238270	3	Interacting selectively and non-covalently with ribosomal RNA.	MF	rRNA binding	R_cluster20
GO:0009725	Auxin response factor	18295	48/32782	0.00245895	0.0204912	0.0146674	HORVU.MOREX.r2.3HG0240310/HORVU.MOREX.r2.1HG0072210	2	Any process that results in a change in state or activity of a cell or an organism (in terms of movement, secretion, enzyme production, gene expression, etc.) as a result of a hormone stimulus.	BP	response to hormone	R_cluster16
GO:0009734	Transport inhibitor response 1	18295	82/32782	0.00700452	0.0358526	0.0256629	HORVU.MOREX.r2.3HG0240310/HORVU.MOREX.r2.1HG0072210	2	A series of molecular signals generated by the binding of the plant hormone auxin to a receptor, and ending with modulation of a downstream cellular process, e.g. transcription.	BP	auxin-activated signaling pathway	R_cluster16
GO:0032502	Mitochondrial transcription termination factor family protein	18295	83/32782	0.00717052	0.0358526	0.0256629	HORVU.MOREX.r2.4HG0283150/HORVU.MOREX.r2.6HG0487890	2	A biological process whose specific outcome is the progression of an integrated living unit: an anatomical structure (which may be a subcellular structure, cell, tissue, or organ), or organism over time from an initial condition to a later condition.	BP	developmental process	R_cluster16
GO:0043565	ROP interactive partner 3	18445	413/32782	2.99854e-06	7.49635e-05	5.36581e-05	HORVU.MOREX.r2.7HG0609340/HORVU.MOREX.r2.4HG0348600/HORVU.MOREX.r2.2HG0104300/HORVU.MOREX.r2.1HG0068990/HORVU.MOREX.r2.2HG0089210/HORVU.MOREX.r2.4HG0334780/HORVU.MOREX.r2.5HG0431380	7	Interacting selectively and non-covalently with DNA of a specific nucleotide composition, e.g. GC-rich DNA binding, or with a specific sequence motif or type of DNA e.g. promotor binding or rDNA binding.	MF	sequence-specific DNA binding	R_cluster16
GO:0046982	Transcription initiation factor TFIID subunit 6	18354	252/32782	0.000594835	0.00743544	0.00532221	HORVU.MOREX.r2.7HG0609340/HORVU.MOREX.r2.7HG0562570/HORVU.MOREX.r2.4HG0325810/HORVU.MOREX.r2.2HG0104300	4	Interacting selectively and non-covalently with a nonidentical protein to form a heterodimer.	MF	protein heterodimerization activity	R_cluster16
GO:0006164	Retrovirus-related Pol polyprotein from transposon TNT 1-94	44236	39/32782	4.93861e-05	0.000444475	0.000181949	HORVU.MOREX.r2.4HG0336370/HORVU.MOREX.r2.3HG0262650	2	The chemical reactions and pathways resulting in the formation of a purine nucleotide, a compound consisting of nucleoside (a purine base linked to a deoxyribose or ribose sugar) esterified with a phosphate group at either the 3' or 5'-hydroxyl group of the sugar.	BP	purine nucleotide biosynthetic process	R_cluster22
GO:0008236	Lysosomal Pro-X carboxypeptidase	44236	166/32782	0.00089638	0.00537828	0.00220164	HORVU.MOREX.r2.7HG0550890/HORVU.MOREX.r2.6HG0493190	2	Catalysis of the hydrolysis of peptide bonds in a polypeptide chain by a catalytic mechanism that involves a catalytic triad consisting of a serine nucleophile that is activated by a proton relay involving an acidic residue (e.g. aspartate or glutamate) and a basic residue (usually histidine).	MF	serine-type peptidase activity	R_cluster22
GO:0009082	Dihydroxy-acid dehydratase	44264	38/32782	1.20119e-07	2.16215e-06	8.8509e-07	HORVU.MOREX.r2.1HG0074710/HORVU.MOREX.r2.2HG0178540/HORVU.MOREX.r2.7HG0572580	3	The chemical reactions and pathways resulting in the formation of amino acids containing a branched carbon skeleton, comprising isoleucine, leucine and valine.	BP	branched-chain amino acid biosynthetic process	R_cluster22
GO:0009097	Dihydroxy-acid dehydratase	44205	20/32782	0.0054781	0.0140866	0.00576643	HORVU.MOREX.r2.1HG0074710	1	The chemical reactions and pathways resulting in the formation of isoleucine, (2R*,3R*)-2-amino-3-methylpentanoic acid.	BP	isoleucine biosynthetic process	R_cluster22
GO:0009098	3-isopropylmalate dehydratase large subunit 2	44205	14/32782	0.00383748	0.0115124	0.0047127	HORVU.MOREX.r2.2HG0178540	1	The chemical reactions and pathways resulting in the formation of leucine, 2-amino-4-methylpentanoic acid.	BP	leucine biosynthetic process	R_cluster22
GO:0009099	Dihydroxy-acid dehydratase	44205	14/32782	0.00383748	0.0115124	0.0047127	HORVU.MOREX.r2.1HG0074710	1	The chemical reactions and pathways resulting in the formation of valine, 2-amino-3-methylbutanoic acid.	BP	valine biosynthetic process	R_cluster22
GO:0070008	Prolyl endopeptidase	44205	10/32782	0.0027424	0.0115124	0.0047127	HORVU.MOREX.r2.6HG0493190	1	Catalysis of the hydrolysis of a peptide bond not more than three residues from the N- or C-terminus of a polypeptide chain by a catalytic mechanism that involves a catalytic triad consisting of a serine nucleophile that is activated by a proton relay involving an acidic residue (e.g. aspartate or glutamate) and a basic residue (usually histidine).	MF	serine-type exopeptidase activity	R_cluster22
GO:0000105	Serine/threonine-protein kinase	44202	32/32782	0.00584304	0.0165692	0.00475672	HORVU.MOREX.r2.6HG0478780	1	The chemical reactions and pathways resulting in the formation of histidine, 2-amino-3-(1H-imidazol-4-yl)propanoic acid.	BP	histidine biosynthetic process	R_cluster25
GO:0003729	Nucleic acid-binding, OB-fold-like protein	44202	76/32782	0.0138307	0.0253564	0.00727934	HORVU.MOREX.r2.2HG0178250	1	Interacting selectively and non-covalently with messenger RNA (mRNA), an intermediate molecule between DNA and protein. mRNA includes UTR and coding sequences, but does not contain introns.	MF	mRNA binding	R_cluster25
GO:0005200	Tubulin beta chain	44202	28/32782	0.00511422	0.0165692	0.00475672	HORVU.MOREX.r2.1HG0019290	1	The action of a molecule that contributes to the structural integrity of a cytoskeletal structure.	MF	structural constituent of cytoskeleton	R_cluster25
GO:0005874	Kinesin-like protein	44202	154/32782	0.0278593	0.043779	0.0125681	HORVU.MOREX.r2.1HG0019290	1	Any of the long, generally straight, hollow tubes of internal diameter 12-15 nm and external diameter 24 nm found in a wide variety of eukaryotic cells; each consists (usually) of 13 protofilaments of polymeric tubulin, staggered in such a manner that the tubulin monomers are arranged in a helical pattern on the microtubular surface, and with the alpha/beta axes of the tubulin subunits parallel t…	CC	microtubule	R_cluster25
GO:0006378	Cleavage and polyadenylation specificity factor subunit 5	44202	15/32782	0.00274248	0.0165692	0.00475672	HORVU.MOREX.r2.2HG0178250	1	The enzymatic addition of a sequence of 40-200 adenylyl residues at the 3' end of a eukaryotic mRNA primary transcript.	BP	mRNA polyadenylation	R_cluster25
GO:0007010	Villin	44202	58/32782	0.0105695	0.023253	0.0066755	HORVU.MOREX.r2.1HG0019290	1	A process that is carried out at the cellular level which results in the assembly, arrangement of constituent parts, or disassembly of cytoskeletal structures.	BP	cytoskeleton organization	R_cluster25
GO:0007017	Tubulin beta chain	44202	33/32782	0.00602518	0.0165692	0.00475672	HORVU.MOREX.r2.1HG0019290	1	Any cellular process that depends upon or alters the microtubule cytoskeleton, that part of the cytoskeleton comprising microtubules and their associated proteins.	BP	microtubule-based process	R_cluster25
GO:0006596	F-box domain containing protein	44236	16/32782	8.02399e-06	4.41319e-05	8.44631e-06	HORVU.MOREX.r2.6HG0491960/HORVU.MOREX.r2.2HG0147840	2	The chemical reactions and pathways resulting in the formation of polyamines, any organic compound containing two or more amino groups.	BP	polyamine biosynthetic process	R_cluster12
GO:0006662	Thioredoxin-like protein	44205	42/32782	0.0114732	0.025241	0.00483082	HORVU.MOREX.r2.1HG0020650	1	The chemical reactions and pathways involving glycerol ethers, any anhydride formed between two organic hydroxy compounds, one of which is glycerol.	BP	glycerol ether metabolic process	R_cluster12
GO:0006855	Protein DETOXIFICATION	44205	86/32782	0.0233671	0.0367197	0.0070277	HORVU.MOREX.r2.6HG0516700	1	The process in which a drug is transported across a membrane.	BP	drug transmembrane transport	R_cluster12
GO:0008295	Arginine decarboxylase	44236	13/32782	5.21782e-06	4.41319e-05	8.44631e-06	HORVU.MOREX.r2.6HG0491960/HORVU.MOREX.r2.2HG0147840	2	The chemical reactions and pathways resulting in the formation of spermidine, N-(3-aminopropyl)-1,4-diaminobutane.	BP	spermidine biosynthetic process	R_cluster12
GO:0009691	Cytokinin riboside 5'-monophosphate phosphoribohydrolase	44205	17/32782	0.00465809	0.0128098	0.00245163	HORVU.MOREX.r2.1HG0065630	1	The chemical reactions and pathways resulting in the formation of cytokinins, a class of adenine-derived compounds that can function in plants as growth regulators.	BP	cytokinin biosynthetic process	R_cluster12
GO:0015035	Glutaredoxin	44205	116/32782	0.0314035	0.038382	0.00734584	HORVU.MOREX.r2.1HG0020650	1	Catalysis of the reaction: a protein with reduced sulfide groups = a protein with oxidized disulfide bonds.	MF	protein disulfide oxidoreductase activity	R_cluster12
GO:0015238	Protein DETOXIFICATION	44205	86/32782	0.0233671	0.0367197	0.0070277	HORVU.MOREX.r2.6HG0516700	1	NA	NA	NA	R_cluster12
GO:0015297	Protein DETOXIFICATION	44205	113/32782	0.0306025	0.038382	0.00734584	HORVU.MOREX.r2.6HG0516700	1	Enables the active transport of a solute across a membrane by a mechanism whereby two or more species are transported in opposite directions in a tightly coupled process not directly linked to a form of energy other than chemiosmotic energy. The reaction is: solute A(out) + solute B(in) = solute A(in) + solute B(out).	MF	antiporter activity	R_cluster12
GO:0016831	Arginine decarboxylase	44236	83/32782	0.000225386	0.000826416	0.000158166	HORVU.MOREX.r2.6HG0491960/HORVU.MOREX.r2.2HG0147840	2	Catalysis of the nonhydrolytic addition or removal of a carboxyl group to or from a compound.	MF	carboxy-lyase activity	R_cluster12
GO:0003725	Dicer-like protein 3	44199	16/32782	0.00146355	0.00926461	NA	HORVU.MOREX.r2.4HG0312850	1	Interacting selectively and non-covalently with double-stranded RNA.	MF	double-stranded RNA binding	R_cluster17
GO:0004518	Transposon Ty1-PR3 Gag-Pol polyprotein	44199	249/32782	0.0226149	0.0268552	NA	HORVU.MOREX.r2.4HG0312850	1	Catalysis of the hydrolysis of ester linkages within nucleic acids.	MF	nuclease activity	R_cluster17
GO:0004519	Transposon Ty1-PR3 Gag-Pol polyprotein	44199	212/32782	0.0192763	0.0244166	NA	HORVU.MOREX.r2.4HG0312850	1	Catalysis of the hydrolysis of ester linkages within nucleic acids by creating internal breaks.	MF	endonuclease activity	R_cluster17
GO:0004525	Dicer-like protein 3	44199	16/32782	0.00146355	0.00926461	NA	HORVU.MOREX.r2.4HG0312850	1	Catalysis of the endonucleolytic cleavage of RNA with 5'-phosphomonoesters and 3'-OH termini; makes two staggered cuts in both strands of dsRNA, leaving a 3' overhang of 2 nt.	MF	ribonuclease III activity	R_cluster17
GO:0005515	transmembrane protein, putative (DUF247)	44199	413/32782	0.0373221	0.0393955	NA	HORVU.MOREX.r2.4HG0312850	1	Interacting selectively and non-covalently with any protein or protein complex (a complex of two or more proteins that may include other nonprotein molecules).	MF	protein binding	R_cluster17
GO:0005654	TTF-type zinc finger protein with HAT dimerization domain	44199	136/32782	0.0123947	0.0181153	NA	HORVU.MOREX.r2.4HG0312850	1	That part of the nuclear content other than the chromosomes or the nucleolus.	CC	nucleoplasm	R_cluster17
GO:0005730	ATP-dependent RNA helicase dbp3	44199	135/32782	0.0123039	0.0181153	NA	HORVU.MOREX.r2.4HG0312850	1	A small, dense body one or more of which are present in the nucleus of eukaryotic cells. It is rich in RNA and protein, is not bounded by a limiting membrane, and is not seen during mitosis. Its prime function is the transcription of the nucleolar DNA into 45S ribosomal-precursor RNA, the processing of this RNA into 5.8S, 18S, and 28S components of ribosomal RNA, and the association of these comp…	CC	nucleolus	R_cluster17
GO:0006396	tRNA pseudouridine synthase B	44199	130/32782	0.01185	0.0181153	NA	HORVU.MOREX.r2.4HG0312850	1	Any process involved in the conversion of one or more primary RNA transcripts into one or more mature RNA molecules.	BP	RNA processing	R_cluster17
GO:0010468	D-3-phosphoglycerate dehydrogenase	44199	29/32782	0.00265163	0.00926461	NA	HORVU.MOREX.r2.4HG0312850	1	Any process that modulates the frequency, rate or extent of gene expression. Gene expression is the process in which a gene's coding sequence is converted into a mature gene product or products (proteins or RNA). This includes the production of an RNA transcript as well as any processing to produce a mature RNA product or an mRNA or circRNA (for protein-coding genes) and the translation of that m…	BP	regulation of gene expression	R_cluster17
GO:0010628	CLAVATA3/ESR (CLE)-related protein 8	44199	24/32782	0.00219479	0.00926461	NA	HORVU.MOREX.r2.4HG0312850	1	Any process that increases the frequency, rate or extent of gene expression. Gene expression is the process in which a gene's coding sequence is converted into a mature gene product or products (proteins or RNA). This includes the production of an RNA transcript as well as any processing to produce a mature RNA product or an mRNA or circRNA (for protein-coding genes) and the translation of that m…	BP	positive regulation of gene expression	R_cluster17
GO:0014069	dipeptide transport ATP-binding protein	44199	32/32782	0.00292567	0.00926461	NA	HORVU.MOREX.r2.4HG0312850	1	An electron dense network of proteins within and adjacent to the postsynaptic membrane of an asymmetric, neuron-neuron synapse. Its major components include neurotransmitter receptors and the proteins that spatially and functionally organize them such as anchoring and scaffolding molecules, signaling enzymes and cytoskeletal components.	CC	postsynaptic density	R_cluster17
GO:0016788	GDSL esterase/lipase	44199	445/32782	0.0401745	0.0401745	NA	HORVU.MOREX.r2.4HG0311830	1	Catalysis of the hydrolysis of any ester bond.	MF	hydrolase activity, acting on ester bonds	R_cluster17
GO:0030422	DNA-directed RNA polymerase subunit	44199	10/32782	0.000914885	0.00926461	NA	HORVU.MOREX.r2.4HG0312850	1	Cleavage of double-stranded RNA to form small interfering RNA molecules (siRNAs) of 21-23 nucleotides, in the context of RNA interference.	BP	production of siRNA involved in RNA interference	R_cluster17
GO:0031047	transmembrane protein, putative (DUF247)	44199	77/32782	0.00703023	0.0148416	NA	HORVU.MOREX.r2.4HG0312850	1	Any process in which RNA molecules inactivate expression of target genes.	BP	gene silencing by RNA	R_cluster17
GO:0042254	ATP-dependent RNA helicase dbp3	44199	72/32782	0.00657472	0.0148416	NA	HORVU.MOREX.r2.4HG0312850	1	A cellular process that results in the biosynthesis of constituent macromolecules, assembly, and arrangement of constituent parts of ribosome subunits; includes transport to the sites of protein synthesis.	BP	ribosome biogenesis	R_cluster17
GO:0042803	Myosin-9	44199	104/32782	0.00948754	0.0180263	NA	HORVU.MOREX.r2.4HG0312850	1	Interacting selectively and non-covalently with an identical protein to form a homodimer.	MF	protein homodimerization activity	R_cluster17
GO:0090305	Transposon Ty1-PR3 Gag-Pol polyprotein	44199	394/32782	0.0356258	0.0393955	NA	HORVU.MOREX.r2.4HG0312850	1	The nucleic acid metabolic process in which the phosphodiester bonds between nucleotides are cleaved by hydrolysis.	BP	nucleic acid phosphodiester bond hydrolysis	R_cluster17
GO:0090501	Transposon Ty1-PR3 Gag-Pol polyprotein	44199	40/32782	0.00365619	0.00992395	NA	HORVU.MOREX.r2.4HG0312850	1	The RNA metabolic process in which the phosphodiester bonds between ribonucleotides are cleaved by hydrolysis.	BP	RNA phosphodiester bond hydrolysis	R_cluster17
GO:0090502	Transposon Ty1-PR3 Gag-Pol polyprotein	44199	174/32782	0.0158395	0.0214964	NA	HORVU.MOREX.r2.4HG0312850	1	The chemical reactions and pathways involving the hydrolysis of internal 3',5'-phosphodiester bonds in one or two strands of ribonucleotides.	BP	RNA phosphodiester bond hydrolysis, endonucleolytic	R_cluster17
GO:0000272	Endoglucanase	44202	61/32782	0.0111137	0.0222274	0.00389954	HORVU.MOREX.r2.4HG0284050	1	The chemical reactions and pathways resulting in the breakdown of a polysaccharide, a polymer of many (typically more than 10) monosaccharide residues linked glycosidically.	BP	polysaccharide catabolic process	R_cluster27
GO:0008810	Endoglucanase	44202	39/32782	0.00711741	0.0175184	0.00307341	HORVU.MOREX.r2.4HG0284050	1	Catalysis of the endohydrolysis of (1->4)-beta-D-glucosidic linkages in cellulose, lichenin and cereal beta-D-glucans.	MF	cellulase activity	R_cluster27
GO:0016760	Cellulose synthase-like protein	44292	49/32782	6.59125e-11	7.90949e-10	1.38763e-10	HORVU.MOREX.r2.1HG0032090/HORVU.MOREX.r2.2HG0091570/HORVU.MOREX.r2.3HG0239900/HORVU.MOREX.r2.5HG0400090	4	Catalysis of the reaction: UDP-glucose + ((1,4)-beta-D-glucosyl)(n) = UDP + ((1,4)-beta-D-glucosyl)(n+1).	MF	cellulose synthase (UDP-forming) activity	R_cluster27
GO:0030244	Cellulose synthase-like protein	44292	58/32782	1.31928e-10	7.91568e-10	1.38872e-10	HORVU.MOREX.r2.1HG0032090/HORVU.MOREX.r2.2HG0091570/HORVU.MOREX.r2.3HG0239900/HORVU.MOREX.r2.5HG0400090	4	The chemical reactions and pathways resulting in the formation of cellulose, a linear beta1-4 glucan of molecular mass 50-400 kDa with the pyranose units in the -4C1 conformation.	BP	cellulose biosynthetic process	R_cluster27
GO:0030245	Endoglucanase	44202	40/32782	0.00729935	0.0175184	0.00307341	HORVU.MOREX.r2.4HG0284050	1	The chemical reactions and pathways resulting in the breakdown of cellulose, a linear beta1-4 glucan of molecular mass 50-400 kDa with the pyranose units in the -4C1 conformation.	BP	cellulose catabolic process	R_cluster27
GO:0071555	Pectin acetylesterase	44292	288/32782	8.63125e-08	3.4525e-07	6.05701e-08	HORVU.MOREX.r2.1HG0032090/HORVU.MOREX.r2.2HG0091570/HORVU.MOREX.r2.3HG0239900/HORVU.MOREX.r2.5HG0400090	4	A process that results in the assembly, arrangement of constituent parts, or disassembly of the cell wall, the rigid or semi-rigid envelope lying outside the cell membrane of plant, fungal and most prokaryotic cells, maintaining their shape and protecting them from osmotic lysis.	BP	cell wall organization	R_cluster27
GO:0008610	Methylsterol monooxygenase 1-2	44265	39/32782	1.8572e-07	1.67148e-06	3.9099e-07	HORVU.MOREX.r2.5HG0434100/HORVU.MOREX.r2.1HG0043590/HORVU.MOREX.r2.6HG0510100	3	The chemical reactions and pathways resulting in the formation of lipids, compounds soluble in an organic solvent but not, or sparingly, in an aqueous solvent.	BP	lipid biosynthetic process	R_cluster6
GO:0009058	Methionine S-methyltransferase	44265	193/32782	2.33869e-05	7.01606e-05	1.64118e-05	HORVU.MOREX.r2.5HG0434100/HORVU.MOREX.r2.4HG0325660/HORVU.MOREX.r2.3HG0261030	3	The chemical reactions and pathways resulting in the formation of substances; typically the energy-requiring part of metabolism in which simpler substances are transformed into more complex ones.	BP	biosynthetic process	R_cluster6
GO:0009102	Pimeloyl-[acyl-carrier protein] methyl ester esterase	44237	16/32782	1.00271e-05	4.51221e-05	1.05549e-05	HORVU.MOREX.r2.4HG0325660/HORVU.MOREX.r2.3HG0261030	2	The chemical reactions and pathways resulting in the formation of biotin, cis-tetrahydro-2-oxothieno(3,4-d)imidazoline-4-valeric acid.	BP	biotin biosynthetic process	R_cluster6
GO:0016746	O-acyltransferase WSD1	44265	382/32782	0.000177278	0.000398875	9.3304e-05	HORVU.MOREX.r2.4HG0325660/HORVU.MOREX.r2.3HG0252260/HORVU.MOREX.r2.3HG0261030	3	Catalysis of the transfer of an acyl group from one compound (donor) to another (acceptor).	MF	transferase activity, transferring acyl groups	R_cluster6
GO:0016765	Protoheme IX farnesyltransferase	44206	58/32782	0.0175548	0.0225705	0.00527965	HORVU.MOREX.r2.5HG0434100	1	Catalysis of the transfer of an alkyl or aryl (but not methyl) group from one compound (donor) to another (acceptor).	MF	transferase activity, transferring alkyl or aryl (other than methyl) groups	R_cluster6
GO:0019706	S-acyltransferase	44206	45/32782	0.0136444	0.0204666	0.00478752	HORVU.MOREX.r2.3HG0252260	1	Catalysis of the transfer of a palmitoyl (systematic name, hexadecanoyl) group to a sulfur atom on the cysteine of a protein molecule, in the reaction hexadecanoyl-CoA + L-cysteinyl-[protein] = CoA + S-hexadecanoyl-L-cysteinyl-[protein].	MF	protein-cysteine S-palmitoyltransferase activity	R_cluster6
GO:0030170	Methionine S-methyltransferase	44237	173/32782	0.00121183	0.0021813	0.000510246	HORVU.MOREX.r2.4HG0325660/HORVU.MOREX.r2.3HG0261030	2	Interacting selectively and non-covalently with pyridoxal 5' phosphate, 3-hydroxy-5-(hydroxymethyl)-2-methyl4-pyridine carboxaldehyde 5' phosphate, the biologically active form of vitamin B6.	MF	pyridoxal phosphate binding	R_cluster6
GO:0000786	Histone H2A	44547	191/32782	6.502e-24	3.9012e-23	6.84421e-24	HORVU.MOREX.r2.1HG0047820/HORVU.MOREX.r2.1HG0064590/HORVU.MOREX.r2.7HG0613370/HORVU.MOREX.r2.1HG0047880/HORVU.MOREX.r2.3HG0191650/HORVU.MOREX.r2.7HG0615100/HORVU.MOREX.r2.1HG0056280/HORVU.MOREX.r2.2HG0113860/HORVU.MOREX.r2.3HG0252760/HORVU.MOREX.r2.6HG0459340/HORVU.MOREX.r2.4HG0331860/HORVU.MOREX.r2.6HG0459280	12	A complex comprised of DNA wound around a multisubunit core and associated proteins, which forms the primary packing unit of DNA into higher order structures.	CC	nucleosome	R_cluster18
GO:0005694	Histone H2A	44547	309/32782	2.35572e-21	4.71145e-21	8.2657e-22	HORVU.MOREX.r2.1HG0047820/HORVU.MOREX.r2.1HG0064590/HORVU.MOREX.r2.7HG0613370/HORVU.MOREX.r2.1HG0047880/HORVU.MOREX.r2.3HG0191650/HORVU.MOREX.r2.7HG0615100/HORVU.MOREX.r2.1HG0056280/HORVU.MOREX.r2.2HG0113860/HORVU.MOREX.r2.3HG0252760/HORVU.MOREX.r2.6HG0459340/HORVU.MOREX.r2.4HG0331860/HORVU.MOREX.r2.6HG0459280	12	A structure composed of a very long molecule of DNA and associated proteins (e.g. histones) that carries hereditary information.	CC	chromosome	R_cluster18
GO:0006325	Chromatin remodeling factor, putative	44244	60/32782	0.000440152	0.000528182	9.26635e-05	HORVU.MOREX.r2.6HG0479380/HORVU.MOREX.r2.2HG0104600	2	Any process that results in the specification, formation or maintenance of the physical structure of eukaryotic chromatin.	BP	chromatin organization	R_cluster18
GO:0016575	Histone deacetylase	44244	12/32782	1.66544e-05	2.49817e-05	4.38275e-06	HORVU.MOREX.r2.6HG0479380/HORVU.MOREX.r2.2HG0104600	2	The modification of histones by removal of acetyl groups.	BP	histone deacetylation	R_cluster18
GO:0046982	Transcription initiation factor TFIID subunit 6	44547	252/32782	1.95597e-22	5.86791e-22	1.02946e-22	HORVU.MOREX.r2.1HG0047820/HORVU.MOREX.r2.1HG0064590/HORVU.MOREX.r2.7HG0613370/HORVU.MOREX.r2.1HG0047880/HORVU.MOREX.r2.3HG0191650/HORVU.MOREX.r2.7HG0615100/HORVU.MOREX.r2.1HG0056280/HORVU.MOREX.r2.2HG0113860/HORVU.MOREX.r2.3HG0252760/HORVU.MOREX.r2.6HG0459340/HORVU.MOREX.r2.4HG0331860/HORVU.MOREX.r2.6HG0459280	12	Interacting selectively and non-covalently with a nonidentical protein to form a heterodimer.	MF	protein heterodimerization activity	R_cluster18
GO:0006807	two-component response regulator	44203	52/32782	0.011052	0.0246849	0.0103937	HORVU.MOREX.r2.2HG0134730	1	The chemical reactions and pathways involving organic or inorganic compounds that contain nitrogen.	BP	nitrogen compound metabolic process	R_cluster5
GO:0008773	Bifunctional uridylyltransferase/uridylyl-removing enzyme	44203	12/32782	0.0025598	0.00959926	0.0040418	HORVU.MOREX.r2.2HG0134730	1	Catalysis of the reaction: UTP + (protein-PII) = diphosphate + uridylyl-(protein-PII).	MF	[protein-PII] uridylyltransferase activity	R_cluster5
GO:0009116	Hypoxanthine phosphoribosyltransferase	44203	45/32782	0.00957032	0.0246849	0.0103937	HORVU.MOREX.r2.1HG0059720	1	The chemical reactions and pathways involving a nucleoside, a nucleobase linked to either beta-D-ribofuranose (a ribonucleoside) or 2-deoxy-beta-D-ribofuranose, (a deoxyribonucleoside), e.g. adenosine, guanosine, inosine, cytidine, uridine and deoxyadenosine, deoxyguanosine, deoxycytidine and thymidine (= deoxythymidine).	BP	nucleoside metabolic process	R_cluster5
GO:0009399	Bifunctional uridylyltransferase/uridylyl-removing enzyme	44203	10/32782	0.00213356	0.00959926	0.0040418	HORVU.MOREX.r2.2HG0134730	1	The process in which nitrogen is taken from its relatively inert molecular form (N2) in the atmosphere and converted into nitrogen compounds useful for other chemical processes, such as ammonia, nitrate and nitrogen dioxide.	BP	nitrogen fixation	R_cluster5
GO:0022900	Dihydrolipoyl dehydrogenase	44234	310/32782	0.00181409	0.00959926	0.0040418	HORVU.MOREX.r2.7HG0541250/HORVU.MOREX.r2.2HG0112010	2	A process in which a series of electron carriers operate together to transfer electrons from donors to any of several different terminal electron acceptors to generate a transmembrane electrochemical gradient.	BP	electron transport chain	R_cluster5
GO:0042651	Photosystem II CP43 reaction center protein	44203	57/32782	0.0121091	0.0246849	0.0103937	HORVU.MOREX.r2.2HG0112010	1	The pigmented membrane of any thylakoid.	CC	thylakoid membrane	R_cluster5
GO:0045158	Cytochrome b6-f complex iron-sulfur subunit	44203	10/32782	0.00213356	0.00959926	0.0040418	HORVU.MOREX.r2.2HG0112010	1	Enables the directed movement of electrons within the cytochrome b6/f complex of photosystem II.	MF	electron transporter, transferring electrons within cytochrome b6/f complex of photosystem II activity	R_cluster5
GO:0051537	F-box protein PP2-A13	44203	62/32782	0.0131653	0.0246849	0.0103937	HORVU.MOREX.r2.2HG0112010	1	Interacting selectively and non-covalently with a 2 iron, 2 sulfur (2Fe-2S) cluster; this cluster consists of two iron atoms, with two inorganic sulfur atoms found between the irons and acting as bridging ligands.	MF	2 iron, 2 sulfur cluster binding	R_cluster5
GO:0005623	Dihydrolipoyl dehydrogenase	44197	204/32782	0.00622293	0.00622293	NA	HORVU.MOREX.r2.3HG0271220	1	The basic structural and functional unit of all organisms. Includes the plasma membrane and any external encapsulating structures such as the cell wall and cell envelope.	CC	cell	R_cluster29
GO:0006662	Thioredoxin-like protein	44197	42/32782	0.00128119	0.00512476	NA	HORVU.MOREX.r2.3HG0271220	1	The chemical reactions and pathways involving glycerol ethers, any anhydride formed between two organic hydroxy compounds, one of which is glycerol.	BP	glycerol ether metabolic process	R_cluster29
GO:0015035	Glutaredoxin	44197	116/32782	0.00353853	0.00622293	NA	HORVU.MOREX.r2.3HG0271220	1	Catalysis of the reaction: a protein with reduced sulfide groups = a protein with oxidized disulfide bonds.	MF	protein disulfide oxidoreductase activity	R_cluster29
GO:0045454	Dihydrolipoyl dehydrogenase	44197	188/32782	0.00573485	0.00622293	NA	HORVU.MOREX.r2.3HG0271220	1	Any process that maintains the redox environment of a cell or compartment within a cell.	BP	cell redox homeostasis	R_cluster29
GO:0005198	D-aminoacid aminotransferase-like PLP-dependent enzymes superfamily protein	44202	116/32782	0.0210458	0.0321808	0.00635147	HORVU.MOREX.r2.2HG0097010	1	The action of a molecule that contributes to the structural integrity of a complex or its assembly within or outside a cell.	MF	structural molecule activity	R_cluster10
GO:0006310	Transposon Ty1-PR3 Gag-Pol polyprotein	44202	200/32782	0.0360544	0.0480725	0.00948799	HORVU.MOREX.r2.5HG0430150	1	Any process in which a new genotype is formed by reassortment of genes resulting in gene combinations different from those that were present in the parents. In eukaryotes genetic recombination can occur by chromosome assortment, intrachromosomal recombination, or nonreciprocal interchromosomal recombination. Interchromosomal recombination occurs by crossing over. In bacteria it may occur by genet…	BP	DNA recombination	R_cluster10
GO:0009378	Plant/F9H3-4 protein	44202	18/32782	0.00329022	0.0255575	0.00504424	HORVU.MOREX.r2.5HG0430150	1	Catalysis of the reaction: ATP + H2O = ADP + phosphate, where this reaction drives the unwinding of the DNA helix of DNA containing four-way junctions, including Holliday junctions.	MF	four-way junction helicase activity	R_cluster10
GO:0009432	Tesmin/TSO1-like CXC domain containing protein	44202	67/32782	0.0122013	0.0321808	0.00635147	HORVU.MOREX.r2.5HG0430150	1	An error-prone process for repairing damaged microbial DNA.	BP	SOS response	R_cluster10
GO:0016032	Polymerase basic protein 2	44202	122/32782	0.0221243	0.0321808	0.00635147	HORVU.MOREX.r2.2HG0097010	1	A multi-organism process in which a virus is a participant. The other participant is the host. Includes infection of a host cell, replication of the viral genome, and assembly of progeny virus particles. In some cases the viral genetic material may integrate into the host genome and only subsequently, under particular circumstances, 'complete' its life cycle.	BP	viral process	R_cluster10
GO:0019012	Fusion glycoprotein F0	44202	119/32782	0.0215852	0.0321808	0.00635147	HORVU.MOREX.r2.2HG0097010	1	The complete fully infectious extracellular virus particle.	CC	virion	R_cluster10
GO:0019013	Gag-Pol polyprotein	44202	67/32782	0.0122013	0.0321808	0.00635147	HORVU.MOREX.r2.2HG0097010	1	The complete protein-nucleic acid complex that is the packaged form of the genome in a virus particle.	CC	viral nucleocapsid	R_cluster10
GO:0019028	Gag-Pol polyprotein	44202	81/32782	0.014735	0.0321808	0.00635147	HORVU.MOREX.r2.2HG0097010	1	The protein coat that surrounds the infective nucleic acid in some virus particles. It comprises numerous regularly arranged subunits, or capsomeres.	CC	viral capsid	R_cluster10
GO:0032508	RNA-directed DNA polymerase (reverse transcriptase)-related family protein	44202	119/32782	0.0215852	0.0321808	0.00635147	HORVU.MOREX.r2.5HG0430150	1	The process in which interchain hydrogen bonds between two strands of DNA are broken or 'melted', generating a region of unpaired single strands.	BP	DNA duplex unwinding	R_cluster10
GO:0039660	Retinal-binding protein	44202	27/32782	0.00493195	0.0255575	0.00504424	HORVU.MOREX.r2.2HG0097010	1	The action of a molecule that contributes to the structural integrity of a virion.	MF	structural constituent of virion	R_cluster10
GO:0039702	Retinal-binding protein	44202	35/32782	0.00638937	0.0255575	0.00504424	HORVU.MOREX.r2.2HG0097010	1	Viral budding which uses a host ESCRT protein complex, or complexes, to mediate the budding process.	BP	viral budding via host ESCRT complex	R_cluster10
GO:0046755	Retinal-binding protein	44202	35/32782	0.00638937	0.0255575	0.00504424	HORVU.MOREX.r2.2HG0097010	1	A viral process by which enveloped viruses acquire a host-derived membrane enriched in viral proteins to form their external envelope. The process starts when nucleocapsids, assembled or in the process of being built, induce formation of a membrane curvature in the host plasma or organelle membrane and wrap up in the forming bud. The process ends when the bud is eventually pinched off by membrane…	BP	viral budding	R_cluster10
GO:0004252	Serine protease	44295	228/32782	2.79422e-07	2.23538e-06	5.88257e-07	HORVU.MOREX.r2.3HG0213080/HORVU.MOREX.r2.7HG0537160/HORVU.MOREX.r2.1HG0077870/HORVU.MOREX.r2.4HG0312490	4	Catalysis of the hydrolysis of internal, alpha-peptide bonds in a polypeptide chain by a catalytic mechanism that involves a catalytic triad consisting of a serine nucleophile that is activated by a proton relay involving an acidic residue (e.g. aspartate or glutamate) and a basic residue (usually histidine).	MF	serine-type endopeptidase activity	R_cluster2
GO:0006457	Peptidyl-prolyl cis-trans isomerase	44264	182/32782	1.37958e-05	5.51833e-05	1.45219e-05	HORVU.MOREX.r2.6HG0515070/HORVU.MOREX.r2.7HG0549280/HORVU.MOREX.r2.5HG0398330	3	The process of assisting in the covalent and noncovalent assembly of single chain polypeptides or multisubunit complexes into the correct tertiary structure.	BP	protein folding	R_cluster2
GO:0009570	Chalcone-flavonone isomerase family protein	44236	110/32782	0.000395535	0.000632855	0.000166541	HORVU.MOREX.r2.4HG0312490/HORVU.MOREX.r2.5HG0414110	2	The space enclosed by the double membrane of a chloroplast but excluding the thylakoid space. It contains DNA, ribosomes and some temporary products of photosynthesis.	CC	chloroplast stroma	R_cluster2
GO:0009941	Transducin/WD-like repeat-protein	44236	76/32782	0.000188948	0.000377897	9.94465e-05	HORVU.MOREX.r2.4HG0312490/HORVU.MOREX.r2.5HG0414110	2	The double lipid bilayer enclosing the chloroplast and separating its contents from the rest of the cytoplasm; includes the intermembrane space.	CC	chloroplast envelope	R_cluster2
GO:0019538	Leucine aminopeptidase, putative	44236	46/32782	6.89119e-05	0.000183765	4.83592e-05	HORVU.MOREX.r2.4HG0326080/HORVU.MOREX.r2.5HG0414110	2	The chemical reactions and pathways involving a protein. Includes protein modification.	BP	protein metabolic process	R_cluster2
GO:0042803	Myosin-9	44205	104/32782	0.028196	0.0375947	0.00989333	HORVU.MOREX.r2.5HG0414110	1	Interacting selectively and non-covalently with an identical protein to form a homodimer.	MF	protein homodimerization activity	R_cluster2
GO:0003924	Ras-like protein	44201	307/32782	0.0459584	0.0459584	NA	HORVU.MOREX.r2.4HG0293280	1	Catalysis of the reaction: GTP + H2O = GDP + phosphate.	MF	GTPase activity	R_cluster26
GO:0005525	Ras-like protein	44232	418/32782	0.00158124	0.00302208	NA	HORVU.MOREX.r2.4HG0293280/HORVU.MOREX.r2.3HG0269660	2	Interacting selectively and non-covalently with GTP, guanosine triphosphate.	MF	GTP binding	R_cluster26
GO:0006614	Signal recognition particle 54 kDa protein	44232	18/32782	2.84472e-06	1.99131e-05	NA	HORVU.MOREX.r2.4HG0293280/HORVU.MOREX.r2.3HG0269660	2	The targeting of proteins to a membrane that occurs during translation and is dependent upon two key components, the signal-recognition particle (SRP) and the SRP receptor. SRP is a cytosolic particle that transiently binds to the endoplasmic reticulum (ER) signal sequence in a nascent protein, to the large ribosomal unit, and to the SRP receptor in the ER membrane.	BP	SRP-dependent cotranslational protein targeting to membrane	R_cluster26
GO:0008312	Signal recognition particle 54 kDa protein	44201	17/32782	0.00259036	0.00302208	NA	HORVU.MOREX.r2.4HG0293280	1	Interacting selectively and non-covalently with 7S RNA, the RNA component of the signal recognition particle (SRP).	MF	7S RNA binding	R_cluster26
GO:0015031	Mitochondrial import inner membrane translocase subunit Tim9	44232	319/32782	0.000925848	0.00302208	NA	HORVU.MOREX.r2.3HG0191640/HORVU.MOREX.r2.5HG0387220	2	The directed movement of proteins into, out of or within a cell, or between cells, by means of some agent such as a transporter or pore.	BP	protein transport	R_cluster26
GO:0032977	Membrane protein insertase YidC	44201	12/32782	0.00182904	0.00302208	NA	HORVU.MOREX.r2.3HG0191640	1	Mediates the integration of proteins into a membrane from the inner side of the membrane. Membrane insertases are highly conserved and include the bacterial YidC family, the plant chloroplast Alb3 family, and the fungal and animal mitochondrial Oxa1/Cox18 family.	MF	membrane insertase activity	R_cluster26
GO:0048500	Signal recognition particle 54 kDa protein	44201	16/32782	0.00243813	0.00302208	NA	HORVU.MOREX.r2.4HG0293280	1	A complex of protein and RNA which facilitates translocation of proteins across membranes.	CC	signal recognition particle	R_cluster26
GO:0004791	Thioredoxin reductase	44197	10/32782	0.000305045	0.000915136	NA	HORVU.MOREX.r2.2HG0096380	1	Catalysis of the reaction: NADP(+) + thioredoxin = H(+) + NADPH + thioredoxin disulfide.	MF	thioredoxin-disulfide reductase activity	R_cluster30
GO:0019430	Superoxide dismutase [Cu-Zn]	44197	23/32782	0.000701605	0.00105241	NA	HORVU.MOREX.r2.2HG0096380	1	Any process, acting at the cellular level, involved in removing superoxide radicals (O2-) from a cell or organism, e.g. by conversion to dioxygen (O2) and hydrogen peroxide (H2O2).	BP	removal of superoxide radicals	R_cluster30
GO:0045454	Dihydrolipoyl dehydrogenase	44197	188/32782	0.00573485	0.00573485	NA	HORVU.MOREX.r2.2HG0096380	1	Any process that maintains the redox environment of a cell or compartment within a cell.	BP	cell redox homeostasis	R_cluster30
GO:0006457	Peptidyl-prolyl cis-trans isomerase	44291	182/32782	4.57607e-09	9.15213e-09	NA	HORVU.MOREX.r2.5HG0366920/HORVU.MOREX.r2.2HG0162620/HORVU.MOREX.r2.3HG0199660/HORVU.MOREX.r2.2HG0123410	4	The process of assisting in the covalent and noncovalent assembly of single chain polypeptides or multisubunit complexes into the correct tertiary structure.	BP	protein folding	R_cluster23
GO:0051082	2-oxoglutarate (2OG) and Fe(II)-dependent oxygenase superfamily protein	44260	107/32782	3.36468e-07	3.36468e-07	NA	HORVU.MOREX.r2.2HG0162620/HORVU.MOREX.r2.3HG0199660/HORVU.MOREX.r2.2HG0123410	3	Interacting selectively and non-covalently with an unfolded protein.	MF	unfolded protein binding	R_cluster23
GO:0006855	Protein DETOXIFICATION	44201	86/32782	0.0130491	0.0171177	NA	HORVU.MOREX.r2.7HG0563000	1	The process in which a drug is transported across a membrane.	BP	drug transmembrane transport	R_cluster19
GO:0015238	Protein DETOXIFICATION	44201	86/32782	0.0130491	0.0171177	NA	HORVU.MOREX.r2.7HG0563000	1	NA	NA	NA	R_cluster19
GO:0015297	Protein DETOXIFICATION	44201	113/32782	0.0171177	0.0171177	NA	HORVU.MOREX.r2.7HG0563000	1	Enables the active transport of a solute across a membrane by a mechanism whereby two or more species are transported in opposite directions in a tightly coupled process not directly linked to a form of energy other than chemiosmotic energy. The reaction is: solute A(out) + solute B(in) = solute A(in) + solute B(out).	MF	antiporter activity	R_cluster19
GO:0015935	30S ribosomal protein S4	44197	70/32782	0.00213532	0.00213532	NA	HORVU.MOREX.r2.5HG0406190	1	The smaller of the two subunits of a ribosome.	CC	small ribosomal subunit	R_cluster31
GO:0006526	Argininosuccinate synthase	44197	32/32782	0.000976145	0.000976145	NA	HORVU.MOREX.r2.2HG0157120	1	The chemical reactions and pathways resulting in the formation of arginine, 2-amino-5-(carbamimidamido)pentanoic acid.	BP	arginine biosynthetic process	R_cluster32
GO:0000165	Receptor protein kinase, putative	44202	72/32782	0.0131068	0.0254622	NA	HORVU.MOREX.r2.6HG0464530	1	An intracellular protein kinase cascade containing at least a MAPK, a MAPKK and a MAP3K. The cascade can also contain an additional tiers: the upstream MAP4K. The kinases in each tier phosphorylate and activate the kinase in the downstream tier to transmit a signal within a cell.	BP	MAPK cascade	R_cluster7
GO:0003729	Nucleic acid-binding, OB-fold-like protein	44202	76/32782	0.0138307	0.0254622	NA	HORVU.MOREX.r2.4HG0322280	1	Interacting selectively and non-covalently with messenger RNA (mRNA), an intermediate molecule between DNA and protein. mRNA includes UTR and coding sequences, but does not contain introns.	MF	mRNA binding	R_cluster7
GO:0004707	Mitogen-activated protein kinase	44202	21/32782	0.00383771	0.0254622	NA	HORVU.MOREX.r2.6HG0464530	1	Catalysis of the reaction: protein + ATP = protein phosphate + ADP. This reaction is the phosphorylation of proteins. Mitogen-activated protein kinase; a family of protein kinases that perform a crucial step in relaying signals from the plasma membrane to the nucleus. They are activated by a wide range of proliferation- or differentiation-inducing signals; activation is strong with agonists such …	MF	MAP kinase activity	R_cluster7
GO:0004715	Kinase, putative	44202	49/32782	0.00893557	0.0254622	NA	HORVU.MOREX.r2.3HG0239700	1	Catalysis of the reaction: ATP + protein L-tyrosine = ADP + protein L-tyrosine phosphate by a non-membrane spanning protein.	MF	non-membrane spanning protein tyrosine kinase activity	R_cluster7
GO:0005654	TTF-type zinc finger protein with HAT dimerization domain	44202	136/32782	0.0246368	0.030796	NA	HORVU.MOREX.r2.4HG0322280	1	That part of the nuclear content other than the chromosomes or the nucleolus.	CC	nucleoplasm	R_cluster7
GO:0016614	L-gulonolactone oxidase	44202	105/32782	0.0190661	0.0272373	NA	HORVU.MOREX.r2.1HG0040100	1	Catalysis of an oxidation-reduction (redox) reaction in which a CH-OH group act as a hydrogen or electron donor and reduces a hydrogen or electron acceptor.	MF	oxidoreductase activity, acting on CH-OH group of donors	R_cluster7
GO:0018108	Receptor-like kinase protein	44202	84/32782	0.0152773	0.0254622	NA	HORVU.MOREX.r2.3HG0239700	1	The phosphorylation of peptidyl-tyrosine to form peptidyl-O4'-phospho-L-tyrosine.	BP	peptidyl-tyrosine phosphorylation	R_cluster7
GO:0050660	Flavin-containing monooxygenase	44202	244/32782	0.0438391	0.0438391	NA	HORVU.MOREX.r2.1HG0040100	1	Interacting selectively and non-covalently with FAD, flavin-adenine dinucleotide, the coenzyme or the prosthetic group of various flavoprotein oxidoreductase enzymes, in either the oxidized form, FAD, or the reduced form, FADH2.	MF	flavin adenine dinucleotide binding	R_cluster7
GO:0051536	Pentatricopeptide repeat-containing protein	44202	241/32782	0.04331	0.0438391	NA	HORVU.MOREX.r2.1HG0040100	1	Interacting selectively and non-covalently with an iron-sulfur cluster, a combination of iron and sulfur atoms.	MF	iron-sulfur cluster binding	R_cluster7
GO:0051537	F-box protein PP2-A13	44202	62/32782	0.011295	0.0254622	NA	HORVU.MOREX.r2.1HG0040100	1	Interacting selectively and non-covalently with a 2 iron, 2 sulfur (2Fe-2S) cluster; this cluster consists of two iron atoms, with two inorganic sulfur atoms found between the irons and acting as bridging ligands.	MF	2 iron, 2 sulfur cluster binding	R_cluster7
GO:0000398	keratin-associated protein, putative (DUF819)	44199	78/32782	0.00712131	0.0092577	NA	HORVU.MOREX.r2.6HG0511470	1	The joining together of exons from one or more primary transcripts of messenger RNA (mRNA) and the excision of intron sequences, via a spliceosomal mechanism, so that mRNA consisting only of the joined exons is produced.	BP	mRNA splicing, via spliceosome	R_cluster21
GO:0005681	keratin-associated protein, putative (DUF819)	44199	38/32782	0.00347359	0.008312	NA	HORVU.MOREX.r2.6HG0511470	1	Any of a series of ribonucleoprotein complexes that contain snRNA(s) and small nuclear ribonucleoproteins (snRNPs), and are formed sequentially during the spliceosomal splicing of one or more substrate RNAs, and which also contain the RNA substrate(s) from the initial target RNAs of splicing, the splicing intermediate RNA(s), to the final RNA products. During cis-splicing, the initial target RNA …	CC	spliceosomal complex	R_cluster21
GO:0005730	ATP-dependent RNA helicase dbp3	44199	135/32782	0.0123039	0.0133292	NA	HORVU.MOREX.r2.6HG0511470	1	A small, dense body one or more of which are present in the nucleus of eukaryotic cells. It is rich in RNA and protein, is not bounded by a limiting membrane, and is not seen during mitosis. Its prime function is the transcription of the nucleolar DNA into 45S ribosomal-precursor RNA, the processing of this RNA into 5.8S, 18S, and 28S components of ribosomal RNA, and the association of these comp…	CC	nucleolus	R_cluster21
GO:0006298	DNA mismatch repair protein mutS	44199	63/32782	0.00575446	0.008312	NA	HORVU.MOREX.r2.3HG0269970	1	A system for the correction of errors in which an incorrect base, which cannot form hydrogen bonds with the corresponding base in the parent strand, is incorporated into the daughter strand. The mismatch repair system promotes genomic fidelity by repairing base-base mismatches, insertion-deletion loops and heterologies generated during DNA replication and recombination.	BP	mismatch repair	R_cluster21
GO:0008380	keratin-associated protein, putative (DUF819)	44199	124/32782	0.0113052	0.0133292	NA	HORVU.MOREX.r2.6HG0511470	1	The process of removing sections of the primary RNA transcript to remove sequences not present in the mature form of the RNA and joining the remaining sections to form the mature form of the RNA.	BP	RNA splicing	R_cluster21
GO:0009651	Kinase family protein	44199	55/32782	0.00502496	0.008312	NA	HORVU.MOREX.r2.6HG0511470	1	Any process that results in a change in state or activity of a cell or an organism (in terms of movement, secretion, enzyme production, gene expression, etc.) as a result of a stimulus indicating an increase or decrease in the concentration of salt (particularly but not exclusively sodium and chloride ions) in the environment.	BP	response to salt stress	R_cluster21
GO:0009737	Zinc finger protein-like 1-like protein	44199	48/32782	0.00438636	0.008312	NA	HORVU.MOREX.r2.6HG0511470	1	Any process that results in a change in state or activity of a cell or an organism (in terms of movement, secretion, enzyme production, gene expression, etc.) as a result of an abscisic acid stimulus.	BP	response to abscisic acid	R_cluster21
GO:0016887	ABC transporter ATP-binding protein	44199	349/32782	0.0316004	0.0316004	NA	HORVU.MOREX.r2.3HG0269970	1	Catalysis of the reaction: ATP + H2O = ADP + phosphate + 2 H+. May or may not be coupled to another reaction.	MF	ATPase activity	R_cluster21
GO:0030983	DNA mismatch repair protein mutS	44199	61/32782	0.00557212	0.008312	NA	HORVU.MOREX.r2.3HG0269970	1	Interacting selectively and non-covalently with double-stranded DNA containing one or more mismatches.	MF	mismatched DNA binding	R_cluster21
GO:0032300	DNA mismatch repair protein mutS	44199	26/32782	0.00237754	0.008312	NA	HORVU.MOREX.r2.3HG0269970	1	Any complex formed of proteins that act in mismatch repair.	CC	mismatch repair complex	R_cluster21
[truncated: 27 more rows]

## Sheet: HvInt(S)
Source	Target	Weight	Source description	Target description
[truncated: 12,798 more rows]

## Sheet: GO enrichment HvInt-S
ID	Description	GeneRatio	BgRatio	pvalue	p.adjust	qvalue	geneID	Count	GO_definition	GO_ontology	GO_term	group
[truncated: 420 more rows]

[truncated: 3 more sheets: HvInt(R-S), GO enrichment HvInt-R-S, HvInt(S-R)]
